# Supplementary material for: Summer weather conditions influence winter survival of honey bees (Apis mellifera) in the northeastern United States
Source: PubMed Central journal article supplement (PMC7811010; doi:10.1038/s41598-021-81051-8), 2021-01-15
Supplement: 41598_2021_81051_MOESM1_ESM.pdf [file 41598_2021_81051_MOESM1_ESM.pdf]

## SUPPLEMENTARY MATERIALS

### TITLE

Summer weather conditions influence winter survival of honey bees (*Apis mellifera*) in the northeastern United States

### AUTHORS

Martina Calovi<sup>1\*</sup>, Christina M. Grozinger<sup>2</sup>, Douglas A. Miller<sup>3,4</sup>, Sarah C. Goslee<sup>5\*</sup>

\*co-corresponding authors: [mcalovi@psu.edu](mailto:mcalovi@psu.edu) , [Sarah.Goslee@usda.gov](mailto:Sarah.Goslee@usda.gov)

1. Department of Ecosystem Science and Management, The Pennsylvania State University, University Park, PA, 16802, USA.
2. Department of Entomology, Center for Pollinator Research, Huck Institutes of the Life Sciences, The Pennsylvania University, University Park, PA, 16802, USA.
3. Department of Geography, The Pennsylvania State University, University Park, PA, 16802, USA.
4. Department of Ecosystem Science and Management, The Pennsylvania State University, University Park, PA, 16802, USA.
5. USDA-ARS Pasture Systems and Watershed Management Research Unit, University Park, PA, 16802, USA.

**Sample questions from Pennsylvania State Beekeepers Survey S1** (please note that the exact list of questions may have varied between years, and thus we focused on questions that were consistently used)

Are you a current member of the PA State Beekeepers Association?

How many colonies of honey bees did you have alive in November of 20???

How many of these colonies have survived, as of mid-April 20???

Do you monitor for mites?

Did you use any mite treatments on these colonies?

Have you found small hive beetles in your colonies?

Were any of your colonies used to provide pollination services?

If so, what crops did they primarily pollinate?

GPS coordinates (if known)

How did you replace losses?

When do you have your primary nectar flow?

What is your primary nectar flow of the year?

Are you raising nucs for sale in Pennsylvania in 2019?

How many years experience do you have keeping honey bees?

**Table S2:** Anonymized survey database included with corresponding weather, topographic, landscape and management data (geographic information is missing for privacy concerns). A description of all the variables is included, and it follows Table 1 presented in the main manuscript.

|           | <b>Description</b>                                                            |
|-----------|-------------------------------------------------------------------------------|
| id        | Sequential number                                                             |
| spring_yr | Spring year                                                                   |
| survival  | Binary survival response                                                      |
| bee1      | Winter minimum temperature                                                    |
| bee2      | Winter total precipitation                                                    |
| bee3      | Winter days within the bee-optimal temperature range -5 °C to +10 °C          |
| bee4      | Winter days with maximum temperature above 16 °C and precipitation below 3 mm |
| bee5      | Winter minimum temperature variation                                          |
| bee6      | Autumn total precipitation                                                    |
| gdd       | Growing degree days (base 5 C)                                                |
| dd_rain   | Days between rain events > 0.25 mm                                            |
| bioc02    | Mean diurnal temperature range                                                |
| bioc03    | Temperature isothermality                                                     |
| bioc04    | Temperature seasonality                                                       |
| bioc05    | Maximum temperature of warmest month                                          |
| bioc06    | Minimum Temperature of Coldest Month                                          |
| bioc07    | Temperature Annual Range                                                      |
| bioc08    | Mean Temperature of Wettest Quarter                                           |
| bioc09    | Mean Temperature of Driest Quarter                                            |
| bioc12    | Annual Precipitation                                                          |
| bioc16    | Precipitation of Wettest Quarter                                              |
| bioc17    | Precipitation of Driest Quarter                                               |
| bioc18    | Precipitation of Warmest Quarter                                              |
| bioc19    | Precipitation of Coldest Quarter                                              |
| elevation | Elevation                                                                     |
| slope     | Slope                                                                         |
| solar_rad | Potential incident solar radiation, 21 Dec                                    |
| pcurv     | Profile curvature                                                             |
| tcurv     | Terrain curvature                                                             |
| twi       | Topographic wetness index                                                     |
| EW        | East/West orientation of slope                                                |
| NS        | North/South orientation of slope                                              |
| ITL       | Distance-weighted Insect Toxic Load                                           |
| FRI       | Distance-weighted Forage Quality autumn                                       |
| exp_yrs   | Beekeeper years of experience                                                 |
| col_nov   | Number of colonies in November                                                |

Table S2 - Anonymized database

| id | spring_yr | survival | bee1     | bee2    | bee3 | bee4 | bee5     | bee6    |
|----|-----------|----------|----------|---------|------|------|----------|---------|
| 1  | 2017      | 1        | -4.36069 | 255.949 | 42   | 3    | 5.219447 | 199.134 |
| 2  | 2017      | 1        | -4.36069 | 255.949 | 42   | 3    | 5.219447 | 199.134 |
| 3  | 2017      | 1        | -3.91699 | 250.93  | 41   | 4    | 5.13138  | 158.388 |
| 4  | 2017      | 1        | -3.91699 | 250.93  | 41   | 4    | 5.13138  | 158.388 |
| 5  | 2017      | 0        | -3.91699 | 250.93  | 41   | 4    | 5.13138  | 158.388 |
| 6  | 2017      | 0        | -3.91699 | 250.93  | 41   | 4    | 5.13138  | 158.388 |
| 7  | 2017      | 0        | -3.91699 | 250.93  | 41   | 4    | 5.13138  | 158.388 |
| 8  | 2017      | 0        | -3.91699 | 250.93  | 41   | 4    | 5.13138  | 158.388 |
| 9  | 2017      | 0        | -3.91699 | 250.93  | 41   | 4    | 5.13138  | 158.388 |
| 10 | 2017      | 0        | -3.82073 | 260.689 | 43   | 3    | 5.227614 | 191.46  |
| 11 | 2017      | 1        | -2.84711 | 309.225 | 43   | 4    | 5.231623 | 420.546 |
| 12 | 2017      | 1        | -4.23402 | 254.908 | 41   | 4    | 5.25069  | 174.998 |
| 13 | 2017      | 1        | -4.23402 | 254.908 | 41   | 4    | 5.25069  | 174.998 |
| 14 | 2017      | 1        | -4.23402 | 254.908 | 41   | 4    | 5.25069  | 174.998 |
| 15 | 2017      | 1        | -4.23402 | 254.908 | 41   | 4    | 5.25069  | 174.998 |
| 16 | 2017      | 1        | -3.11921 | 256.488 | 39   | 9    | 5.628216 | 249.682 |
| 17 | 2017      | 0        | -2.66657 | 279.187 | 39   | 9    | 5.705937 | 251.112 |
| 18 | 2017      | 1        | -2.34964 | 250.488 | 43   | 8    | 5.578132 | 205.594 |
| 19 | 2017      | 1        | -2.34964 | 250.488 | 43   | 8    | 5.578132 | 205.594 |
| 20 | 2017      | 1        | -3.25281 | 268.095 | 38   | 9    | 5.634371 | 255.319 |
| 21 | 2017      | 1        | -3.25281 | 268.095 | 38   | 9    | 5.634371 | 255.319 |
| 22 | 2017      | 1        | -3.25281 | 268.095 | 38   | 9    | 5.634371 | 255.319 |
| 23 | 2017      | 1        | -3.25281 | 268.095 | 38   | 9    | 5.634371 | 255.319 |
| 24 | 2017      | 1        | -3.25281 | 268.095 | 38   | 9    | 5.634371 | 255.319 |
| 25 | 2017      | 0        | -3.25281 | 268.095 | 38   | 9    | 5.634371 | 255.319 |
| 26 | 2017      | 0        | -3.25281 | 268.095 | 38   | 9    | 5.634371 | 255.319 |
| 27 | 2017      | 0        | -1.1028  | 254.063 | 47   | 7    | 4.569406 | 154.869 |
| 28 | 2017      | 0        | -1.1028  | 254.063 | 47   | 7    | 4.569406 | 154.869 |
| 29 | 2017      | 1        | -1.67815 | 243.274 | 42   | 6    | 4.674064 | 172.809 |
| 30 | 2017      | 1        | -0.82113 | 231.405 | 47   | 7    | 4.717594 | 179.124 |
| 31 | 2017      | 1        | -0.82113 | 231.405 | 47   | 7    | 4.717594 | 179.124 |
| 32 | 2017      | 0        | -0.82113 | 231.405 | 47   | 7    | 4.717594 | 179.124 |
| 33 | 2017      | 0        | -5.50916 | 271.421 | 28   | 4    | 5.703766 | 245.691 |
| 34 | 2017      | 0        | -5.50916 | 271.421 | 28   | 4    | 5.703766 | 245.691 |
| 35 | 2017      | 1        | -2.44371 | 217.816 | 48   | 5    | 4.640893 | 138.423 |
| 36 | 2017      | 1        | -5.89067 | 255.451 | 29   | 3    | 5.851359 | 271.748 |
| 37 | 2017      | 1        | -5.89067 | 255.451 | 29   | 3    | 5.851359 | 271.748 |
| 38 | 2017      | 1        | -5.89067 | 255.451 | 29   | 3    | 5.851359 | 271.748 |
| 39 | 2017      | 1        | -5.89067 | 255.451 | 29   | 3    | 5.851359 | 271.748 |
| 40 | 2017      | 0        | -5.89067 | 255.451 | 29   | 3    | 5.851359 | 271.748 |
| 41 | 2017      | 1        | -2.41516 | 281.324 | 51   | 4    | 4.609469 | 135.313 |
| 42 | 2017      | 1        | -0.62281 | 196.601 | 50   | 9    | 5.000262 | 120.801 |
| 43 | 2017      | 0        | -4.15284 | 241.354 | 44   | 4    | 5.075255 | 165.691 |
| 44 | 2017      | 0        | -4.15284 | 241.354 | 44   | 4    | 5.075255 | 165.691 |
| 45 | 2017      | 1        | -4.02763 | 320.581 | 39   | 5    | 5.949704 | 283.617 |
| 46 | 2017      | 0        | -4.02763 | 320.581 | 39   | 5    | 5.949704 | 283.617 |
| 47 | 2017      | 0        | -4.02763 | 320.581 | 39   | 5    | 5.949704 | 283.617 |
| 48 | 2017      | 0        | -4.02763 | 320.581 | 39   | 5    | 5.949704 | 283.617 |
| 49 | 2017      | 0        | -4.02763 | 320.581 | 39   | 5    | 5.949704 | 283.617 |

Table S2 - Anonymized database

|    |      |   |          |         |    |   |          |         |
|----|------|---|----------|---------|----|---|----------|---------|
| 50 | 2017 | 1 | -3.91699 | 250.93  | 41 | 4 | 5.13138  | 158.388 |
| 51 | 2017 | 1 | -3.91699 | 250.93  | 41 | 4 | 5.13138  | 158.388 |
| 52 | 2017 | 1 | -3.91699 | 250.93  | 41 | 4 | 5.13138  | 158.388 |
| 53 | 2017 | 0 | -3.91699 | 250.93  | 41 | 4 | 5.13138  | 158.388 |
| 54 | 2017 | 0 | -3.91699 | 250.93  | 41 | 4 | 5.13138  | 158.388 |
| 55 | 2017 | 0 | -3.91699 | 250.93  | 41 | 4 | 5.13138  | 158.388 |
| 56 | 2017 | 0 | -3.91699 | 250.93  | 41 | 4 | 5.13138  | 158.388 |
| 57 | 2017 | 1 | -2.44569 | 267.856 | 50 | 6 | 4.747708 | 161.22  |
| 58 | 2017 | 1 | -2.19266 | 223.705 | 40 | 6 | 4.845217 | 179.86  |
| 59 | 2017 | 1 | -2.19266 | 223.705 | 40 | 6 | 4.845217 | 179.86  |
| 60 | 2017 | 1 | -2.19266 | 223.705 | 40 | 6 | 4.845217 | 179.86  |
| 61 | 2017 | 0 | -6.27829 | 280.736 | 29 | 1 | 5.385093 | 166.786 |
| 62 | 2017 | 0 | -6.27829 | 280.736 | 29 | 1 | 5.385093 | 166.786 |
| 63 | 2017 | 0 | -6.27829 | 280.736 | 29 | 1 | 5.385093 | 166.786 |
| 64 | 2017 | 0 | -6.27829 | 280.736 | 29 | 1 | 5.385093 | 166.786 |
| 65 | 2017 | 0 | -1.74929 | 187.55  | 51 | 6 | 4.50047  | 158.041 |
| 66 | 2017 | 0 | -1.74929 | 187.55  | 51 | 6 | 4.50047  | 158.041 |
| 67 | 2017 | 0 | -2.76385 | 342.135 | 39 | 5 | 5.909051 | 323.233 |
| 68 | 2017 | 0 | -1.51202 | 234.967 | 46 | 5 | 4.498084 | 158.335 |
| 69 | 2017 | 0 | -1.51202 | 234.967 | 46 | 5 | 4.498084 | 158.335 |
| 70 | 2017 | 0 | -4.71991 | 235.65  | 40 | 4 | 5.499929 | 190.248 |
| 71 | 2017 | 0 | -4.71991 | 235.65  | 40 | 4 | 5.499929 | 190.248 |
| 72 | 2017 | 1 | -3.37782 | 317.836 | 33 | 7 | 6.291442 | 235.771 |
| 73 | 2017 | 1 | -3.37782 | 317.836 | 33 | 7 | 6.291442 | 235.771 |
| 74 | 2017 | 0 | -3.37782 | 317.836 | 33 | 7 | 6.291442 | 235.771 |
| 75 | 2017 | 0 | -3.37782 | 317.836 | 33 | 7 | 6.291442 | 235.771 |
| 76 | 2017 | 1 | -2.37481 | 292.987 | 41 | 9 | 5.935042 | 294.079 |
| 77 | 2017 | 1 | -6.08353 | 278.206 | 33 | 2 | 5.33728  | 208.905 |
| 78 | 2017 | 1 | -6.08353 | 278.206 | 33 | 2 | 5.33728  | 208.905 |
| 79 | 2017 | 1 | -6.08353 | 278.206 | 33 | 2 | 5.33728  | 208.905 |
| 80 | 2017 | 0 | -6.08353 | 278.206 | 33 | 2 | 5.33728  | 208.905 |
| 81 | 2017 | 0 | -6.08353 | 278.206 | 33 | 2 | 5.33728  | 208.905 |
| 82 | 2017 | 0 | -6.08353 | 278.206 | 33 | 2 | 5.33728  | 208.905 |
| 83 | 2017 | 0 | -6.08353 | 278.206 | 33 | 2 | 5.33728  | 208.905 |
| 84 | 2017 | 0 | -6.08353 | 278.206 | 33 | 2 | 5.33728  | 208.905 |
| 85 | 2017 | 0 | -4.41719 | 332.607 | 34 | 4 | 5.723377 | 344.114 |
| 86 | 2017 | 0 | -4.41719 | 332.607 | 34 | 4 | 5.723377 | 344.114 |
| 87 | 2017 | 1 | -4.35438 | 342.828 | 33 | 3 | 5.835702 | 311.989 |
| 88 | 2017 | 0 | -4.35438 | 342.828 | 33 | 3 | 5.835702 | 311.989 |
| 89 | 2017 | 0 | -0.95466 | 262.192 | 47 | 6 | 4.689568 | 144.347 |
| 90 | 2018 | 1 | -6.88819 | 301.882 | 29 | 2 | 6.529027 | 195.725 |
| 91 | 2018 | 0 | -6.88819 | 301.882 | 29 | 2 | 6.529027 | 195.725 |
| 92 | 2018 | 0 | -6.88819 | 301.882 | 29 | 2 | 6.529027 | 195.725 |
| 93 | 2018 | 0 | -6.88819 | 301.882 | 29 | 2 | 6.529027 | 195.725 |
| 94 | 2018 | 0 | -6.88819 | 301.882 | 29 | 2 | 6.529027 | 195.725 |
| 95 | 2018 | 0 | -6.88819 | 301.882 | 29 | 2 | 6.529027 | 195.725 |
| 96 | 2018 | 0 | -7.43247 | 332.114 | 25 | 3 | 6.71717  | 208.137 |
| 97 | 2018 | 1 | -6.48333 | 394.557 | 17 | 3 | 7.808361 | 262.725 |
| 98 | 2018 | 1 | -6.48333 | 394.557 | 17 | 3 | 7.808361 | 262.725 |
| 99 | 2018 | 1 | -6.48333 | 394.557 | 17 | 3 | 7.808361 | 262.725 |

Table S2 - Anonymized database

|     |      |   |          |         |    |   |          |         |
|-----|------|---|----------|---------|----|---|----------|---------|
| 100 | 2018 | 1 | -6.48333 | 394.557 | 17 | 3 | 7.808361 | 262.725 |
| 101 | 2018 | 1 | -6.48333 | 394.557 | 17 | 3 | 7.808361 | 262.725 |
| 102 | 2018 | 1 | -6.48333 | 394.557 | 17 | 3 | 7.808361 | 262.725 |
| 103 | 2018 | 0 | -6.48333 | 394.557 | 17 | 3 | 7.808361 | 262.725 |
| 104 | 2018 | 1 | -5.90725 | 366.045 | 21 | 2 | 7.512705 | 252.161 |
| 105 | 2018 | 1 | -5.90725 | 366.045 | 21 | 2 | 7.512705 | 252.161 |
| 106 | 2018 | 1 | -5.90725 | 366.045 | 21 | 2 | 7.512705 | 252.161 |
| 107 | 2018 | 1 | -6.40208 | 277.682 | 30 | 2 | 6.105073 | 258.973 |
| 108 | 2018 | 0 | -6.40208 | 277.682 | 30 | 2 | 6.105073 | 258.973 |
| 109 | 2018 | 1 | -7.39365 | 313.661 | 20 | 2 | 7.515178 | 245.655 |
| 110 | 2018 | 1 | -7.39365 | 313.661 | 20 | 2 | 7.515178 | 245.655 |
| 111 | 2018 | 1 | -7.39365 | 313.661 | 20 | 2 | 7.515178 | 245.655 |
| 112 | 2018 | 1 | -5.77559 | 374.622 | 16 | 2 | 7.911587 | 269.805 |
| 113 | 2018 | 0 | -5.77559 | 374.622 | 16 | 2 | 7.911587 | 269.805 |
| 114 | 2018 | 1 | -6.21015 | 363.865 | 21 | 2 | 7.552881 | 264.371 |
| 115 | 2018 | 1 | -6.21015 | 363.865 | 21 | 2 | 7.552881 | 264.371 |
| 116 | 2018 | 1 | -6.21015 | 363.865 | 21 | 2 | 7.552881 | 264.371 |
| 117 | 2018 | 1 | -6.49495 | 310.095 | 24 | 1 | 6.916134 | 351.541 |
| 118 | 2018 | 0 | -6.49495 | 310.095 | 24 | 1 | 6.916134 | 351.541 |
| 119 | 2018 | 1 | -4.617   | 272.42  | 34 | 2 | 5.883047 | 224.837 |
| 120 | 2018 | 1 | -4.617   | 272.42  | 34 | 2 | 5.883047 | 224.837 |
| 121 | 2018 | 1 | -4.617   | 272.42  | 34 | 2 | 5.883047 | 224.837 |
| 122 | 2018 | 1 | -4.617   | 272.42  | 34 | 2 | 5.883047 | 224.837 |
| 123 | 2018 | 1 | -4.617   | 272.42  | 34 | 2 | 5.883047 | 224.837 |
| 124 | 2018 | 1 | -4.617   | 272.42  | 34 | 2 | 5.883047 | 224.837 |
| 125 | 2018 | 1 | -4.617   | 272.42  | 34 | 2 | 5.883047 | 224.837 |
| 126 | 2018 | 1 | -8.65423 | 308.168 | 20 | 2 | 7.117683 | 236.414 |
| 127 | 2018 | 0 | -7.20009 | 364.583 | 20 | 2 | 7.820609 | 262.127 |
| 128 | 2018 | 1 | -4.87848 | 263.795 | 31 | 3 | 5.976067 | 224.208 |
| 129 | 2018 | 1 | -4.87848 | 263.795 | 31 | 3 | 5.976067 | 224.208 |
| 130 | 2018 | 0 | -4.87848 | 263.795 | 31 | 3 | 5.976067 | 224.208 |
| 131 | 2018 | 0 | -4.87848 | 263.795 | 31 | 3 | 5.976067 | 224.208 |
| 132 | 2018 | 0 | -4.87848 | 263.795 | 31 | 3 | 5.976067 | 224.208 |
| 133 | 2018 | 1 | -4.4763  | 261.526 | 31 | 2 | 5.876564 | 215.879 |
| 134 | 2018 | 1 | -4.4763  | 261.526 | 31 | 2 | 5.876564 | 215.879 |
| 135 | 2018 | 1 | -6.33545 | 385.796 | 20 | 2 | 7.653489 | 281.62  |
| 136 | 2018 | 1 | -6.33545 | 385.796 | 20 | 2 | 7.653489 | 281.62  |
| 137 | 2018 | 1 | -6.33545 | 385.796 | 20 | 2 | 7.653489 | 281.62  |
| 138 | 2018 | 0 | -6.351   | 266.57  | 33 | 3 | 6.343261 | 241.322 |
| 139 | 2018 | 1 | -6.90174 | 306.527 | 25 | 3 | 6.60448  | 168.631 |
| 140 | 2018 | 0 | -5.69859 | 365.818 | 22 | 2 | 7.792316 | 251.577 |
| 141 | 2018 | 1 | -4.74038 | 330.101 | 31 | 2 | 6.290736 | 216.878 |
| 142 | 2018 | 1 | -7.82124 | 334.567 | 18 | 1 | 7.513873 | 250.932 |
| 143 | 2018 | 1 | -7.82124 | 334.567 | 18 | 1 | 7.513873 | 250.932 |
| 144 | 2018 | 0 | -7.82124 | 334.567 | 18 | 1 | 7.513873 | 250.932 |
| 145 | 2018 | 0 | -7.82124 | 334.567 | 18 | 1 | 7.513873 | 250.932 |
| 146 | 2018 | 0 | -7.82124 | 334.567 | 18 | 1 | 7.513873 | 250.932 |
| 147 | 2018 | 1 | -5.39716 | 365.214 | 28 | 2 | 7.43428  | 266.66  |
| 148 | 2018 | 1 | -4.89354 | 249.698 | 28 | 3 | 6.306965 | 191.885 |
| 149 | 2018 | 0 | -4.89354 | 249.698 | 28 | 3 | 6.306965 | 191.885 |

Table S2 - Anonymized database

|     |      |   |          |         |    |   |          |         |
|-----|------|---|----------|---------|----|---|----------|---------|
| 150 | 2018 | 1 | -5.50224 | 229.409 | 26 | 3 | 6.216757 | 249.32  |
| 151 | 2018 | 1 | -6.75184 | 351.38  | 15 | 2 | 7.815742 | 280.961 |
| 152 | 2018 | 1 | -4.7954  | 320.677 | 31 | 2 | 6.34931  | 176.38  |
| 153 | 2018 | 0 | -4.7954  | 320.677 | 31 | 2 | 6.34931  | 176.38  |
| 154 | 2018 | 0 | -5.1961  | 326.94  | 31 | 2 | 6.173674 | 222.067 |
| 155 | 2018 | 1 | -6.58408 | 381.708 | 16 | 3 | 7.864085 | 312.963 |
| 156 | 2018 | 0 | -6.58408 | 381.708 | 16 | 3 | 7.864085 | 312.963 |
| 157 | 2018 | 0 | -6.58408 | 381.708 | 16 | 3 | 7.864085 | 312.963 |
| 158 | 2018 | 1 | -5.14502 | 320.559 | 29 | 3 | 6.399948 | 186.715 |
| 159 | 2018 | 1 | -5.14502 | 320.559 | 29 | 3 | 6.399948 | 186.715 |
| 160 | 2018 | 1 | -7.94169 | 345.115 | 18 | 2 | 7.964071 | 283.577 |
| 161 | 2018 | 0 | -7.94169 | 345.115 | 18 | 2 | 7.964071 | 283.577 |
| 162 | 2018 | 0 | -4.61864 | 274.952 | 35 | 3 | 5.960754 | 208.252 |
| 163 | 2018 | 1 | -7.55909 | 356.968 | 19 | 1 | 7.863856 | 261.97  |
| 164 | 2018 | 1 | -5.02796 | 330.199 | 33 | 2 | 5.989155 | 220.014 |
| 165 | 2018 | 1 | -5.02796 | 330.199 | 33 | 2 | 5.989155 | 220.014 |
| 166 | 2018 | 1 | -5.02796 | 330.199 | 33 | 2 | 5.989155 | 220.014 |
| 167 | 2018 | 1 | -5.02796 | 330.199 | 33 | 2 | 5.989155 | 220.014 |
| 168 | 2018 | 1 | -5.02796 | 330.199 | 33 | 2 | 5.989155 | 220.014 |
| 169 | 2018 | 1 | -5.02796 | 330.199 | 33 | 2 | 5.989155 | 220.014 |
| 170 | 2018 | 1 | -5.02796 | 330.199 | 33 | 2 | 5.989155 | 220.014 |
| 171 | 2018 | 0 | -5.02796 | 330.199 | 33 | 2 | 5.989155 | 220.014 |
| 172 | 2018 | 1 | -4.53398 | 301.064 | 30 | 1 | 6.283117 | 206.422 |
| 173 | 2018 | 1 | -4.25138 | 245.162 | 33 | 1 | 5.949284 | 183.973 |
| 174 | 2018 | 1 | -4.25138 | 245.162 | 33 | 1 | 5.949284 | 183.973 |
| 175 | 2018 | 1 | -4.25138 | 245.162 | 33 | 1 | 5.949284 | 183.973 |
| 176 | 2018 | 1 | -4.25138 | 245.162 | 33 | 1 | 5.949284 | 183.973 |
| 177 | 2018 | 0 | -7.07599 | 282.616 | 29 | 2 | 6.611127 | 164.806 |
| 178 | 2018 | 0 | -7.07599 | 282.616 | 29 | 2 | 6.611127 | 164.806 |
| 179 | 2018 | 0 | -7.07599 | 282.616 | 29 | 2 | 6.611127 | 164.806 |
| 180 | 2018 | 0 | -7.07599 | 282.616 | 29 | 2 | 6.611127 | 164.806 |
| 181 | 2018 | 1 | -7.81114 | 353.792 | 19 | 2 | 7.937767 | 285.335 |
| 182 | 2018 | 1 | -7.81114 | 353.792 | 19 | 2 | 7.937767 | 285.335 |
| 183 | 2018 | 1 | -4.56224 | 327.497 | 31 | 2 | 6.316774 | 179.786 |
| 184 | 2018 | 0 | -4.56224 | 327.497 | 31 | 2 | 6.316774 | 179.786 |
| 185 | 2018 | 0 | -4.92368 | 249.868 | 27 | 2 | 6.349614 | 181.04  |
| 186 | 2018 | 0 | -4.92368 | 249.868 | 27 | 2 | 6.349614 | 181.04  |
| 187 | 2018 | 0 | -4.92368 | 249.868 | 27 | 2 | 6.349614 | 181.04  |
| 188 | 2018 | 0 | -4.92368 | 249.868 | 27 | 2 | 6.349614 | 181.04  |
| 189 | 2018 | 1 | -8.36164 | 232.982 | 28 | 1 | 6.739847 | 155.565 |
| 190 | 2018 | 1 | -8.36164 | 232.982 | 28 | 1 | 6.739847 | 155.565 |
| 191 | 2018 | 0 | -8.36164 | 232.982 | 28 | 1 | 6.739847 | 155.565 |
| 192 | 2018 | 1 | -6.20356 | 372.322 | 21 | 2 | 7.571872 | 272.363 |
| 193 | 2018 | 1 | -6.30913 | 329.647 | 29 | 2 | 6.266621 | 226.935 |
| 194 | 2018 | 1 | -6.30913 | 329.647 | 29 | 2 | 6.266621 | 226.935 |
| 195 | 2018 | 1 | -6.30913 | 329.647 | 29 | 2 | 6.266621 | 226.935 |
| 196 | 2018 | 0 | -6.30913 | 329.647 | 29 | 2 | 6.266621 | 226.935 |
| 197 | 2019 | 1 | -4.32079 | 298.703 | 40 | 2 | 5.256502 | 468.632 |
| 198 | 2019 | 1 | -4.15021 | 384.071 | 44 | 1 | 5.121034 | 480.147 |
| 199 | 2019 | 0 | -4.24736 | 331.21  | 43 | 4 | 5.016366 | 519.1   |



Table S2 - Anonymized database

|     |      |   |          |         |    |   |          |         |
|-----|------|---|----------|---------|----|---|----------|---------|
| 200 | 2019 | 0 | -3.81418 | 331.612 | 44 | 2 | 4.772582 | 511.533 |
| 201 | 2019 | 1 | -6.17555 | 270.877 | 38 | 0 | 5.833252 | 484.947 |
| 202 | 2019 | 1 | -4.73384 | 352.958 | 40 | 1 | 5.403044 | 537.427 |
| 203 | 2019 | 1 | -3.75734 | 322.093 | 44 | 2 | 4.80665  | 475.52  |
| 204 | 2019 | 1 | -1.95247 | 398.256 | 53 | 3 | 4.525149 | 640.779 |
| 205 | 2019 | 0 | -4.57584 | 303.157 | 40 | 2 | 5.300677 | 463.864 |
| 206 | 2019 | 1 | -4.53618 | 313.966 | 39 | 2 | 5.291598 | 478.142 |
| 207 | 2019 | 1 | -4.33018 | 342.578 | 39 | 2 | 5.477741 | 614.214 |
| 208 | 2019 | 1 | -4.33018 | 342.578 | 39 | 2 | 5.477741 | 614.214 |
| 209 | 2019 | 1 | -4.41011 | 336.875 | 47 | 1 | 5.149436 | 524.707 |
| 210 | 2019 | 0 | -4.41011 | 336.875 | 47 | 1 | 5.149436 | 524.707 |
| 211 | 2019 | 1 | -4.2633  | 325.812 | 40 | 2 | 5.236413 | 489.847 |
| 212 | 2019 | 0 | -6.36062 | 318.007 | 40 | 0 | 5.700947 | 458.444 |
| 213 | 2019 | 1 | -4.22433 | 320.648 | 46 | 1 | 5.172312 | 491.093 |
| 214 | 2019 | 1 | -4.22433 | 320.648 | 46 | 1 | 5.172312 | 491.093 |
| 215 | 2019 | 0 | -3.18124 | 322     | 53 | 1 | 4.868373 | 472.559 |
| 216 | 2019 | 0 | -3.9488  | 354.511 | 46 | 1 | 5.098173 | 568.326 |
| 217 | 2019 | 1 | -4.14487 | 326.941 | 42 | 2 | 5.308244 | 534.958 |
| 218 | 2019 | 0 | -3.32877 | 405.774 | 47 | 2 | 5.007678 | 505.575 |
| 219 | 2019 | 1 | -6.24288 | 391.685 | 38 | 0 | 5.22349  | 575.969 |
| 220 | 2019 | 1 | -3.75855 | 321.524 | 48 | 1 | 5.03645  | 476.372 |
| 221 | 2019 | 1 | -3.23505 | 292.894 | 50 | 2 | 5.061666 | 468.763 |
| 222 | 2019 | 0 | -2.62644 | 335.621 | 49 | 3 | 4.628169 | 565.458 |
| 223 | 2019 | 0 | -4.41796 | 375.687 | 39 | 1 | 5.141097 | 548.239 |
| 224 | 2019 | 1 | -4.17502 | 356.028 | 45 | 2 | 5.06267  | 509.974 |
| 225 | 2019 | 1 | -4.27281 | 352.552 | 45 | 1 | 5.109867 | 518.887 |
| 226 | 2019 | 0 | -4.27281 | 352.552 | 45 | 1 | 5.109867 | 518.887 |
| 227 | 2019 | 0 | -6.55951 | 299.438 | 36 | 0 | 6.000892 | 471.31  |
| 228 | 2019 | 1 | -3.6911  | 330.824 | 47 | 1 | 4.999539 | 589.911 |
| 229 | 2019 | 0 | -3.6911  | 330.824 | 47 | 1 | 4.999539 | 589.911 |
| 230 | 2019 | 0 | -6.23256 | 263.12  | 35 | 1 | 5.8627   | 383.889 |
| 231 | 2019 | 0 | -6.23256 | 263.12  | 35 | 1 | 5.8627   | 383.889 |
| 232 | 2019 | 0 | -4.46262 | 322.218 | 37 | 2 | 5.455272 | 601.429 |
| 233 | 2019 | 0 | -2.48211 | 400.639 | 51 | 2 | 4.783273 | 514.754 |
| 234 | 2019 | 0 | -3.63914 | 334.62  | 46 | 2 | 4.63291  | 511.473 |
| 235 | 2019 | 1 | -5.15019 | 289.288 | 45 | 1 | 5.376062 | 499.956 |
| 236 | 2019 | 1 | -5.07581 | 330.386 | 32 | 2 | 5.808935 | 496.347 |
| 237 | 2019 | 1 | -5.07581 | 330.386 | 32 | 2 | 5.808935 | 496.347 |
| 238 | 2019 | 0 | -5.07581 | 330.386 | 32 | 2 | 5.808935 | 496.347 |
| 239 | 2019 | 0 | -5.07581 | 330.386 | 32 | 2 | 5.808935 | 496.347 |
| 240 | 2019 | 1 | -5.94608 | 339.673 | 38 | 0 | 5.682072 | 507.493 |
| 241 | 2019 | 1 | -5.94608 | 339.673 | 38 | 0 | 5.682072 | 507.493 |
| 242 | 2019 | 1 | -4.23208 | 365.71  | 43 | 1 | 5.194001 | 519.539 |
| 243 | 2019 | 1 | -4.46704 | 342.849 | 36 | 2 | 5.522096 | 511.449 |
| 244 | 2019 | 1 | -8.06668 | 248.124 | 28 | 0 | 5.879601 | 501.356 |
| 245 | 2019 | 1 | -4.48699 | 335.255 | 43 | 2 | 5.329501 | 560.741 |
| 246 | 2019 | 1 | -4.48699 | 335.255 | 43 | 2 | 5.329501 | 560.741 |
| 247 | 2019 | 1 | -6.9887  | 274.518 | 39 | 0 | 6.269623 | 498.654 |
| 248 | 2019 | 1 | -4.72295 | 327.698 | 44 | 1 | 5.411894 | 477.704 |
| 249 | 2019 | 0 | -4.72295 | 327.698 | 44 | 1 | 5.411894 | 477.704 |

Table S2 - Anonymized database

|     |      |   |          |         |    |   |          |         |
|-----|------|---|----------|---------|----|---|----------|---------|
| 250 | 2019 | 0 | -4.72295 | 327.698 | 44 | 1 | 5.411894 | 477.704 |
| 251 | 2019 | 1 | -5.31249 | 332.657 | 37 | 1 | 5.727701 | 529.991 |
| 252 | 2019 | 1 | -6.41129 | 269.816 | 36 | 0 | 5.565534 | 563.718 |
| 253 | 2019 | 0 | -5.40087 | 309.561 | 36 | 0 | 5.442493 | 484.634 |
| 254 | 2019 | 0 | -5.40087 | 309.561 | 36 | 0 | 5.442493 | 484.634 |
| 255 | 2019 | 0 | -5.40087 | 309.561 | 36 | 0 | 5.442493 | 484.634 |
| 256 | 2019 | 1 | -3.51463 | 367.233 | 49 | 2 | 5.232931 | 532.969 |
| 257 | 2019 | 1 | -4.05765 | 338.255 | 40 | 1 | 5.013981 | 520.512 |
| 258 | 2019 | 1 | -4.05765 | 338.255 | 40 | 1 | 5.013981 | 520.512 |
| 259 | 2019 | 1 | -4.05765 | 338.255 | 40 | 1 | 5.013981 | 520.512 |
| 260 | 2019 | 1 | -5.5641  | 310.64  | 43 | 0 | 5.404042 | 506.256 |
| 261 | 2019 | 1 | -5.5641  | 310.64  | 43 | 0 | 5.404042 | 506.256 |
| 262 | 2019 | 0 | -5.47236 | 416.38  | 34 | 1 | 5.313608 | 622.153 |
| 263 | 2019 | 1 | -3.66295 | 333.767 | 45 | 2 | 4.952486 | 513.223 |
| 264 | 2019 | 0 | -3.66295 | 333.767 | 45 | 2 | 4.952486 | 513.223 |
| 265 | 2019 | 1 | -4.79401 | 322.572 | 45 | 1 | 5.279937 | 571.487 |
| 266 | 2019 | 0 | -4.79401 | 322.572 | 45 | 1 | 5.279937 | 571.487 |
| 267 | 2019 | 1 | -4.75329 | 310.003 | 46 | 0 | 5.133521 | 487.816 |
| 268 | 2019 | 1 | -4.75329 | 310.003 | 46 | 0 | 5.133521 | 487.816 |
| 269 | 2019 | 1 | -3.28244 | 324.213 | 43 | 2 | 4.698999 | 534.732 |
| 270 | 2019 | 1 | -3.28244 | 324.213 | 43 | 2 | 4.698999 | 534.732 |
| 271 | 2019 | 1 | -3.28244 | 324.213 | 43 | 2 | 4.698999 | 534.732 |
| 272 | 2019 | 1 | -3.50415 | 318.524 | 53 | 1 | 5.022956 | 490.892 |
| 273 | 2019 | 0 | -3.50415 | 318.524 | 53 | 1 | 5.022956 | 490.892 |
| 274 | 2019 | 1 | -6.05771 | 256.914 | 35 | 2 | 5.984195 | 423.871 |
| 275 | 2019 | 1 | -6.05771 | 256.914 | 35 | 2 | 5.984195 | 423.871 |
| 276 | 2019 | 1 | -4.40974 | 345.852 | 46 | 1 | 5.137047 | 529.694 |
| 277 | 2019 | 0 | -4.40974 | 345.852 | 46 | 1 | 5.137047 | 529.694 |
| 278 | 2019 | 0 | -7.76235 | 277.011 | 30 | 0 | 6.483886 | 487.437 |
| 279 | 2019 | 0 | -4.07084 | 313.487 | 45 | 1 | 5.190497 | 514.185 |
| 280 | 2019 | 1 | -5.19449 | 358.12  | 38 | 1 | 5.838659 | 552.653 |
| 281 | 2019 | 1 | -5.19449 | 358.12  | 38 | 1 | 5.838659 | 552.653 |
| 282 | 2019 | 1 | -4.29449 | 321.305 | 42 | 1 | 5.220583 | 528.529 |
| 283 | 2019 | 0 | -4.29449 | 321.305 | 42 | 1 | 5.220583 | 528.529 |
| 284 | 2019 | 1 | -4.63667 | 327.979 | 38 | 2 | 5.431978 | 566.958 |
| 285 | 2019 | 1 | -4.63667 | 327.979 | 38 | 2 | 5.431978 | 566.958 |
| 286 | 2019 | 1 | -4.63667 | 327.979 | 38 | 2 | 5.431978 | 566.958 |
| 287 | 2019 | 0 | -4.63667 | 327.979 | 38 | 2 | 5.431978 | 566.958 |
| 288 | 2019 | 1 | -4.4804  | 331.583 | 42 | 1 | 5.148194 | 518.009 |
| 289 | 2019 | 0 | -3.75833 | 320.514 | 50 | 1 | 5.0674   | 485.061 |
| 290 | 2019 | 1 | -3.91564 | 347.476 | 38 | 3 | 5.476024 | 565.449 |
| 291 | 2019 | 1 | -4.061   | 330.015 | 41 | 2 | 5.321926 | 523.361 |
| 292 | 2019 | 1 | -4.061   | 330.015 | 41 | 2 | 5.321926 | 523.361 |
| 293 | 2019 | 1 | -3.9578  | 317.211 | 45 | 1 | 5.123914 | 480.404 |
| 294 | 2019 | 1 | -3.9578  | 317.211 | 45 | 1 | 5.123914 | 480.404 |
| 295 | 2019 | 1 | -6.43747 | 269.529 | 36 | 0 | 5.95026  | 447.542 |
| 296 | 2019 | 0 | -6.43747 | 269.529 | 36 | 0 | 5.95026  | 447.542 |
| 297 | 2019 | 0 | -6.43747 | 269.529 | 36 | 0 | 5.95026  | 447.542 |
| 298 | 2019 | 0 | -3.55612 | 376.155 | 48 | 2 | 5.019857 | 559.01  |
| 299 | 2019 | 0 | -3.55612 | 376.155 | 48 | 2 | 5.019857 | 559.01  |

Table S2 - Anonymized database

|     |      |   |          |         |    |   |          |         |
|-----|------|---|----------|---------|----|---|----------|---------|
| 300 | 2019 | 1 | -5.59907 | 348.703 | 37 | 0 | 5.467555 | 576.059 |
| 301 | 2019 | 1 | -5.59907 | 348.703 | 37 | 0 | 5.467555 | 576.059 |
| 302 | 2019 | 0 | -4.20769 | 318.57  | 43 | 3 | 4.95145  | 488.611 |
| 303 | 2019 | 0 | -4.20769 | 318.57  | 43 | 3 | 4.95145  | 488.611 |
| 304 | 2019 | 0 | -4.20769 | 318.57  | 43 | 3 | 4.95145  | 488.611 |
| 305 | 2019 | 0 | -4.20769 | 318.57  | 43 | 3 | 4.95145  | 488.611 |
| 306 | 2019 | 1 | -3.69078 | 312.203 | 44 | 2 | 5.240152 | 492.006 |
| 307 | 2019 | 1 | -3.55705 | 304.823 | 47 | 2 | 5.08267  | 474.252 |
| 308 | 2019 | 0 | -3.55705 | 304.823 | 47 | 2 | 5.08267  | 474.252 |
| 309 | 2019 | 1 | -4.33927 | 330.623 | 43 | 2 | 5.00001  | 502.706 |
| 310 | 2019 | 1 | -4.33927 | 330.623 | 43 | 2 | 5.00001  | 502.706 |
| 311 | 2019 | 1 | -4.33927 | 330.623 | 43 | 2 | 5.00001  | 502.706 |
| 312 | 2019 | 1 | -4.33927 | 330.623 | 43 | 2 | 5.00001  | 502.706 |
| 313 | 2019 | 1 | -4.38503 | 341.272 | 44 | 1 | 5.119593 | 519.767 |
| 314 | 2019 | 1 | -4.33927 | 330.623 | 43 | 2 | 5.00001  | 502.706 |
| 315 | 2019 | 1 | -4.33927 | 330.623 | 43 | 2 | 5.00001  | 502.706 |
| 316 | 2019 | 1 | -4.91638 | 309.095 | 41 | 2 | 5.392417 | 497.162 |
| 317 | 2019 | 1 | -4.91638 | 309.095 | 41 | 2 | 5.392417 | 497.162 |
| 318 | 2019 | 1 | -5.87555 | 315.59  | 40 | 0 | 5.694942 | 516.263 |
| 319 | 2019 | 1 | -5.87555 | 315.59  | 40 | 0 | 5.694942 | 516.263 |
| 320 | 2019 | 0 | -5.87555 | 315.59  | 40 | 0 | 5.694942 | 516.263 |
| 321 | 2019 | 1 | -6.59369 | 250.609 | 36 | 0 | 5.62224  | 483.596 |
| 322 | 2019 | 0 | -5.84955 | 308.039 | 32 | 0 | 5.886017 | 561.172 |
| 323 | 2019 | 1 | -3.49504 | 313.277 | 46 | 2 | 4.914761 | 491.934 |
| 324 | 2019 | 0 | -3.49504 | 313.277 | 46 | 2 | 4.914761 | 491.934 |
| 325 | 2019 | 1 | -4.19045 | 320.987 | 41 | 2 | 5.221517 | 501.406 |
| 326 | 2019 | 1 | -4.19045 | 320.987 | 41 | 2 | 5.221517 | 501.406 |
| 327 | 2019 | 1 | -4.19045 | 320.987 | 41 | 2 | 5.221517 | 501.406 |
| 328 | 2019 | 1 | -6.17124 | 287.268 | 41 | 0 | 5.625112 | 492.719 |
| 329 | 2019 | 1 | -6.17124 | 287.268 | 41 | 0 | 5.625112 | 492.719 |
| 330 | 2019 | 1 | -6.17124 | 287.268 | 41 | 0 | 5.625112 | 492.719 |
| 331 | 2019 | 1 | -6.17124 | 287.268 | 41 | 0 | 5.625112 | 492.719 |
| 332 | 2019 | 1 | -2.67178 | 364.946 | 50 | 2 | 4.603849 | 583.92  |
| 333 | 2019 | 1 | -2.67178 | 364.946 | 50 | 2 | 4.603849 | 583.92  |
| 334 | 2019 | 0 | -2.67178 | 364.946 | 50 | 2 | 4.603849 | 583.92  |
| 335 | 2019 | 1 | -3.5203  | 317.732 | 49 | 1 | 4.986291 | 463.512 |
| 336 | 2019 | 1 | -3.5203  | 317.732 | 49 | 1 | 4.986291 | 463.512 |
| 337 | 2019 | 1 | -3.5203  | 317.732 | 49 | 1 | 4.986291 | 463.512 |
| 338 | 2019 | 1 | -3.93419 | 340.409 | 38 | 3 | 5.31214  | 548.711 |
| 339 | 2019 | 1 | -3.93419 | 340.409 | 38 | 3 | 5.31214  | 548.711 |
| 340 | 2019 | 1 | -3.93419 | 340.409 | 38 | 3 | 5.31214  | 548.711 |
| 341 | 2019 | 1 | -4.47043 | 303.935 | 41 | 1 | 5.195107 | 513.713 |
| 342 | 2019 | 1 | -4.47043 | 303.935 | 41 | 1 | 5.195107 | 513.713 |
| 343 | 2019 | 1 | -4.27204 | 308.602 | 41 | 2 | 5.232071 | 467.972 |
| 344 | 2019 | 1 | -4.27204 | 308.602 | 41 | 2 | 5.232071 | 467.972 |
| 345 | 2019 | 1 | -4.27204 | 308.602 | 41 | 2 | 5.232071 | 467.972 |
| 346 | 2019 | 1 | -4.27204 | 308.602 | 41 | 2 | 5.232071 | 467.972 |
| 347 | 2019 | 0 | -4.27204 | 308.602 | 41 | 2 | 5.232071 | 467.972 |
| 348 | 2019 | 0 | -5.24159 | 310.989 | 43 | 0 | 5.287071 | 440.49  |
| 349 | 2019 | 0 | -5.24159 | 310.989 | 43 | 0 | 5.287071 | 440.49  |

Table S2 - Anonymized database

|     |      |   |          |         |    |   |          |         |
|-----|------|---|----------|---------|----|---|----------|---------|
| 350 | 2019 | 1 | -3.87159 | 318.522 | 48 | 1 | 5.018917 | 488.66  |
| 351 | 2019 | 0 | -3.87159 | 318.522 | 48 | 1 | 5.018917 | 488.66  |
| 352 | 2019 | 0 | -3.87159 | 318.522 | 48 | 1 | 5.018917 | 488.66  |
| 353 | 2019 | 0 | -4.45918 | 334.315 | 37 | 2 | 5.523238 | 511.474 |
| 354 | 2019 | 0 | -4.45918 | 334.315 | 37 | 2 | 5.523238 | 511.474 |
| 355 | 2019 | 0 | -4.45918 | 334.315 | 37 | 2 | 5.523238 | 511.474 |
| 356 | 2019 | 0 | -7.82548 | 322.886 | 28 | 0 | 5.510701 | 528.394 |
| 357 | 2019 | 0 | -7.82548 | 322.886 | 28 | 0 | 5.510701 | 528.394 |
| 358 | 2019 | 1 | -4.05768 | 386.287 | 43 | 1 | 5.090078 | 505.107 |
| 359 | 2019 | 1 | -4.05768 | 386.287 | 43 | 1 | 5.090078 | 505.107 |
| 360 | 2019 | 0 | -4.05768 | 386.287 | 43 | 1 | 5.090078 | 505.107 |
| 361 | 2019 | 0 | -4.05768 | 386.287 | 43 | 1 | 5.090078 | 505.107 |
| 362 | 2019 | 0 | -4.05768 | 386.287 | 43 | 1 | 5.090078 | 505.107 |
| 363 | 2019 | 0 | -4.05768 | 386.287 | 43 | 1 | 5.090078 | 505.107 |
| 364 | 2019 | 0 | -7.33269 | 184.695 | 33 | 0 | 5.911776 | 469.051 |
| 365 | 2019 | 0 | -7.33269 | 184.695 | 33 | 0 | 5.911776 | 469.051 |
| 366 | 2019 | 0 | -7.33269 | 184.695 | 33 | 0 | 5.911776 | 469.051 |
| 367 | 2019 | 0 | -7.33269 | 184.695 | 33 | 0 | 5.911776 | 469.051 |
| 368 | 2019 | 1 | -3.96623 | 304.299 | 52 | 1 | 5.140466 | 459.523 |
| 369 | 2019 | 1 | -3.96623 | 304.299 | 52 | 1 | 5.140466 | 459.523 |
| 370 | 2019 | 0 | -3.96623 | 304.299 | 52 | 1 | 5.140466 | 459.523 |
| 371 | 2019 | 0 | -3.96623 | 304.299 | 52 | 1 | 5.140466 | 459.523 |
| 372 | 2019 | 1 | -7.65899 | 238.94  | 34 | 0 | 5.859651 | 518.333 |
| 373 | 2019 | 1 | -7.65899 | 238.94  | 34 | 0 | 5.859651 | 518.333 |
| 374 | 2019 | 0 | -7.65899 | 238.94  | 34 | 0 | 5.859651 | 518.333 |
| 375 | 2019 | 1 | -5.6137  | 294.652 | 41 | 0 | 5.426873 | 543.489 |
| 376 | 2019 | 1 | -5.6137  | 294.652 | 41 | 0 | 5.426873 | 543.489 |
| 377 | 2019 | 1 | -5.6137  | 294.652 | 41 | 0 | 5.426873 | 543.489 |
| 378 | 2019 | 0 | -5.6137  | 294.652 | 41 | 0 | 5.426873 | 543.489 |
| 379 | 2019 | 0 | -5.6137  | 294.652 | 41 | 0 | 5.426873 | 543.489 |
| 380 | 2019 | 1 | -7.00074 | 299.039 | 36 | 0 | 6.096522 | 389.577 |
| 381 | 2019 | 0 | -7.00074 | 299.039 | 36 | 0 | 6.096522 | 389.577 |
| 382 | 2019 | 0 | -7.00074 | 299.039 | 36 | 0 | 6.096522 | 389.577 |
| 383 | 2019 | 0 | -7.00074 | 299.039 | 36 | 0 | 6.096522 | 389.577 |
| 384 | 2019 | 1 | -2.90229 | 317.849 | 52 | 2 | 4.930131 | 537.539 |
| 385 | 2019 | 1 | -2.90229 | 317.849 | 52 | 2 | 4.930131 | 537.539 |
| 386 | 2019 | 1 | -2.90229 | 317.849 | 52 | 2 | 4.930131 | 537.539 |
| 387 | 2019 | 1 | -2.90229 | 317.849 | 52 | 2 | 4.930131 | 537.539 |
| 388 | 2019 | 1 | -3.93111 | 324.98  | 44 | 2 | 5.178228 | 540.026 |
| 389 | 2019 | 1 | -3.93111 | 324.98  | 44 | 2 | 5.178228 | 540.026 |
| 390 | 2019 | 1 | -3.93111 | 324.98  | 44 | 2 | 5.178228 | 540.026 |
| 391 | 2019 | 1 | -3.4318  | 319.197 | 46 | 2 | 5.039764 | 515.073 |
| 392 | 2019 | 1 | -3.4318  | 319.197 | 46 | 2 | 5.039764 | 515.073 |
| 393 | 2019 | 1 | -3.4318  | 319.197 | 46 | 2 | 5.039764 | 515.073 |
| 394 | 2019 | 1 | -4.55829 | 313.129 | 39 | 1 | 4.963728 | 501.908 |
| 395 | 2019 | 1 | -4.55829 | 313.129 | 39 | 1 | 4.963728 | 501.908 |
| 396 | 2019 | 0 | -4.55829 | 313.129 | 39 | 1 | 4.963728 | 501.908 |
| 397 | 2019 | 1 | -8.35988 | 217.186 | 26 | 0 | 6.415313 | 407.724 |
| 398 | 2019 | 1 | -8.35988 | 217.186 | 26 | 0 | 6.415313 | 407.724 |
| 399 | 2019 | 1 | -8.35988 | 217.186 | 26 | 0 | 6.415313 | 407.724 |

Table S2 - Anonymized database

|     |      |   |          |         |    |   |          |         |
|-----|------|---|----------|---------|----|---|----------|---------|
| 400 | 2019 | 1 | -8.35988 | 217.186 | 26 | 0 | 6.415313 | 407.724 |
| 401 | 2019 | 1 | -5.31593 | 314.043 | 36 | 2 | 5.66843  | 508.904 |
| 402 | 2019 | 1 | -5.31593 | 314.043 | 36 | 2 | 5.66843  | 508.904 |
| 403 | 2019 | 1 | -5.31593 | 314.043 | 36 | 2 | 5.66843  | 508.904 |
| 404 | 2019 | 1 | -5.31593 | 314.043 | 36 | 2 | 5.66843  | 508.904 |
| 405 | 2019 | 1 | -5.31593 | 314.043 | 36 | 2 | 5.66843  | 508.904 |
| 406 | 2019 | 1 | -5.31593 | 314.043 | 36 | 2 | 5.66843  | 508.904 |
| 407 | 2019 | 1 | -4.7944  | 356.626 | 44 | 1 | 5.006661 | 556.198 |
| 408 | 2019 | 1 | -4.7944  | 356.626 | 44 | 1 | 5.006661 | 556.198 |
| 409 | 2019 | 1 | -4.7944  | 356.626 | 44 | 1 | 5.006661 | 556.198 |
| 410 | 2019 | 1 | -4.7944  | 356.626 | 44 | 1 | 5.006661 | 556.198 |
| 411 | 2019 | 1 | -4.45186 | 362.907 | 39 | 1 | 5.173466 | 572.828 |
| 412 | 2019 | 1 | -4.45186 | 362.907 | 39 | 1 | 5.173466 | 572.828 |
| 413 | 2019 | 1 | -4.45186 | 362.907 | 39 | 1 | 5.173466 | 572.828 |
| 414 | 2019 | 1 | -4.45186 | 362.907 | 39 | 1 | 5.173466 | 572.828 |
| 415 | 2019 | 1 | -4.45186 | 362.907 | 39 | 1 | 5.173466 | 572.828 |
| 416 | 2019 | 1 | -4.45186 | 362.907 | 39 | 1 | 5.173466 | 572.828 |
| 417 | 2019 | 1 | -4.45186 | 362.907 | 39 | 1 | 5.173466 | 572.828 |
| 418 | 2019 | 1 | -4.45186 | 362.907 | 39 | 1 | 5.173466 | 572.828 |
| 419 | 2019 | 1 | -4.45186 | 362.907 | 39 | 1 | 5.173466 | 572.828 |
| 420 | 2019 | 1 | -4.45186 | 362.907 | 39 | 1 | 5.173466 | 572.828 |
| 421 | 2019 | 1 | -3.3129  | 348.276 | 48 | 1 | 4.975174 | 484.098 |
| 422 | 2019 | 1 | -3.3129  | 348.276 | 48 | 1 | 4.975174 | 484.098 |
| 423 | 2019 | 1 | -3.3129  | 348.276 | 48 | 1 | 4.975174 | 484.098 |
| 424 | 2019 | 1 | -3.3129  | 348.276 | 48 | 1 | 4.975174 | 484.098 |
| 425 | 2019 | 1 | -5.45258 | 304.945 | 43 | 0 | 5.550265 | 480.654 |
| 426 | 2019 | 1 | -5.45258 | 304.945 | 43 | 0 | 5.550265 | 480.654 |
| 427 | 2019 | 1 | -5.45258 | 304.945 | 43 | 0 | 5.550265 | 480.654 |
| 428 | 2019 | 1 | -5.45258 | 304.945 | 43 | 0 | 5.550265 | 480.654 |
| 429 | 2019 | 1 | -5.45258 | 304.945 | 43 | 0 | 5.550265 | 480.654 |
| 430 | 2019 | 0 | -5.45258 | 304.945 | 43 | 0 | 5.550265 | 480.654 |
| 431 | 2019 | 0 | -5.45258 | 304.945 | 43 | 0 | 5.550265 | 480.654 |
| 432 | 2019 | 0 | -5.45258 | 304.945 | 43 | 0 | 5.550265 | 480.654 |
| 433 | 2019 | 0 | -5.45258 | 304.945 | 43 | 0 | 5.550265 | 480.654 |
| 434 | 2017 | 1 | -3.25281 | 268.095 | 38 | 9 | 5.634371 | 255.319 |
| 435 | 2017 | 0 | -3.91699 | 250.93  | 41 | 4 | 5.13138  | 158.388 |
| 436 | 2017 | 1 | -4.02763 | 320.581 | 39 | 5 | 5.949704 | 283.617 |
| 437 | 2017 | 0 | -1.9847  | 238.16  | 43 | 6 | 4.704746 | 134.217 |
| 438 | 2017 | 0 | -0.82113 | 231.405 | 47 | 7 | 4.717594 | 179.124 |
| 439 | 2017 | 0 | -4.23402 | 254.908 | 41 | 4 | 5.25069  | 174.998 |
| 440 | 2017 | 0 | -4.02763 | 320.581 | 39 | 5 | 5.949704 | 283.617 |
| 441 | 2017 | 1 | -1.74929 | 187.55  | 51 | 6 | 4.50047  | 158.041 |
| 442 | 2017 | 0 | -3.91699 | 250.93  | 41 | 4 | 5.13138  | 158.388 |
| 443 | 2017 | 1 | -2.66657 | 279.187 | 39 | 9 | 5.705937 | 251.112 |
| 444 | 2017 | 1 | -5.50916 | 271.421 | 28 | 4 | 5.703766 | 245.691 |
| 445 | 2017 | 0 | -3.91699 | 250.93  | 41 | 4 | 5.13138  | 158.388 |
| 446 | 2017 | 0 | -3.91699 | 250.93  | 41 | 4 | 5.13138  | 158.388 |
| 447 | 2017 | 1 | -5.89067 | 255.451 | 29 | 3 | 5.851359 | 271.748 |
| 448 | 2017 | 1 | -4.15284 | 241.354 | 44 | 4 | 5.075255 | 165.691 |
| 449 | 2017 | 1 | -2.68832 | 269.539 | 49 | 4 | 4.510327 | 154.518 |

Table S2 - Anonymized database

|     |      |   |          |         |    |    |          |         |
|-----|------|---|----------|---------|----|----|----------|---------|
| 450 | 2017 | 0 | -3.91699 | 250.93  | 41 | 4  | 5.13138  | 158.388 |
| 451 | 2017 | 1 | -4.36069 | 255.949 | 42 | 3  | 5.219447 | 199.134 |
| 452 | 2017 | 0 | -3.91699 | 250.93  | 41 | 4  | 5.13138  | 158.388 |
| 453 | 2017 | 1 | -3.88911 | 291.142 | 38 | 6  | 6.068213 | 253.926 |
| 454 | 2017 | 1 | -2.50998 | 260.164 | 44 | 6  | 4.736388 | 137.96  |
| 455 | 2017 | 0 | -2.84711 | 309.225 | 43 | 4  | 5.231623 | 420.546 |
| 456 | 2017 | 1 | -4.23402 | 254.908 | 41 | 4  | 5.25069  | 174.998 |
| 457 | 2017 | 0 | -3.91699 | 250.93  | 41 | 4  | 5.13138  | 158.388 |
| 458 | 2017 | 1 | -4.23402 | 254.908 | 41 | 4  | 5.25069  | 174.998 |
| 459 | 2017 | 0 | -4.41719 | 332.607 | 34 | 4  | 5.723377 | 344.114 |
| 460 | 2017 | 0 | -4.41719 | 332.607 | 34 | 4  | 5.723377 | 344.114 |
| 461 | 2017 | 1 | -4.23402 | 254.908 | 41 | 4  | 5.25069  | 174.998 |
| 462 | 2017 | 0 | -4.71991 | 235.65  | 40 | 4  | 5.499929 | 190.248 |
| 463 | 2017 | 1 | -2.68832 | 269.539 | 49 | 4  | 4.510327 | 154.518 |
| 464 | 2017 | 0 | -4.02763 | 320.581 | 39 | 5  | 5.949704 | 283.617 |
| 465 | 2017 | 1 | -3.91699 | 250.93  | 41 | 4  | 5.13138  | 158.388 |
| 466 | 2017 | 0 | -2.58724 | 292.76  | 47 | 6  | 4.721779 | 135.801 |
| 467 | 2017 | 0 | -2.54548 | 206.109 | 50 | 4  | 4.652779 | 173.933 |
| 468 | 2017 | 0 | -2.76385 | 342.135 | 39 | 5  | 5.909051 | 323.233 |
| 469 | 2017 | 1 | -1.33192 | 237.143 | 49 | 5  | 4.479017 | 176.606 |
| 470 | 2017 | 1 | -4.36069 | 255.949 | 42 | 3  | 5.219447 | 199.134 |
| 471 | 2017 | 0 | -4.71991 | 235.65  | 40 | 4  | 5.499929 | 190.248 |
| 472 | 2017 | 0 | -2.85334 | 264.701 | 39 | 10 | 5.700035 | 238.075 |
| 473 | 2017 | 1 | -3.25281 | 268.095 | 38 | 9  | 5.634371 | 255.319 |
| 474 | 2017 | 0 | -2.41516 | 281.324 | 51 | 4  | 4.609469 | 135.313 |
| 475 | 2017 | 0 | -2.50998 | 260.164 | 44 | 6  | 4.736388 | 137.96  |
| 476 | 2017 | 0 | -3.91699 | 250.93  | 41 | 4  | 5.13138  | 158.388 |
| 477 | 2017 | 1 | -1.33192 | 237.143 | 49 | 5  | 4.479017 | 176.606 |
| 478 | 2017 | 1 | -3.37782 | 317.836 | 33 | 7  | 6.291442 | 235.771 |
| 479 | 2017 | 1 | -2.84711 | 309.225 | 43 | 4  | 5.231623 | 420.546 |
| 480 | 2017 | 0 | -3.91699 | 250.93  | 41 | 4  | 5.13138  | 158.388 |
| 481 | 2017 | 1 | -4.15284 | 241.354 | 44 | 4  | 5.075255 | 165.691 |
| 482 | 2017 | 1 | -3.11921 | 256.488 | 39 | 9  | 5.628216 | 249.682 |
| 483 | 2017 | 0 | -1.9456  | 209.2   | 46 | 6  | 4.532762 | 165.345 |
| 484 | 2017 | 1 | -0.95466 | 262.192 | 47 | 6  | 4.689568 | 144.347 |
| 485 | 2017 | 0 | -4.15284 | 241.354 | 44 | 4  | 5.075255 | 165.691 |
| 486 | 2017 | 1 | -2.34964 | 250.488 | 43 | 8  | 5.578132 | 205.594 |
| 487 | 2017 | 1 | -4.71991 | 235.65  | 40 | 4  | 5.499929 | 190.248 |
| 488 | 2017 | 0 | -4.02763 | 320.581 | 39 | 5  | 5.949704 | 283.617 |
| 489 | 2017 | 0 | -3.91699 | 250.93  | 41 | 4  | 5.13138  | 158.388 |
| 490 | 2017 | 1 | -2.43968 | 272.889 | 41 | 6  | 4.817793 | 185.432 |
| 491 | 2017 | 0 | -2.96015 | 195.957 | 45 | 7  | 4.610741 | 126.263 |
| 492 | 2017 | 1 | -3.37782 | 317.836 | 33 | 7  | 6.291442 | 235.771 |
| 493 | 2017 | 1 | -0.95466 | 262.192 | 47 | 6  | 4.689568 | 144.347 |
| 494 | 2017 | 0 | -6.08353 | 278.206 | 33 | 2  | 5.33728  | 208.905 |
| 495 | 2017 | 0 | -3.91699 | 250.93  | 41 | 4  | 5.13138  | 158.388 |
| 496 | 2017 | 0 | -2.76942 | 272.611 | 45 | 6  | 4.776855 | 143.822 |
| 497 | 2017 | 1 | -6.27829 | 280.736 | 29 | 1  | 5.385093 | 166.786 |
| 498 | 2017 | 1 | -5.89067 | 255.451 | 29 | 3  | 5.851359 | 271.748 |
| 499 | 2017 | 0 | -0.62281 | 196.601 | 50 | 9  | 5.000262 | 120.801 |

Table S2 - Anonymized database

|     |      |   |          |         |    |   |          |         |
|-----|------|---|----------|---------|----|---|----------|---------|
| 500 | 2017 | 1 | -2.68832 | 269.539 | 49 | 4 | 4.510327 | 154.518 |
| 501 | 2017 | 1 | -1.9456  | 209.2   | 46 | 6 | 4.532762 | 165.345 |
| 502 | 2017 | 0 | -3.91699 | 250.93  | 41 | 4 | 5.13138  | 158.388 |
| 503 | 2017 | 0 | -6.27829 | 280.736 | 29 | 1 | 5.385093 | 166.786 |
| 504 | 2017 | 0 | -4.02763 | 320.581 | 39 | 5 | 5.949704 | 283.617 |
| 505 | 2017 | 1 | -4.35438 | 342.828 | 33 | 3 | 5.835702 | 311.989 |
| 506 | 2017 | 0 | -5.89067 | 255.451 | 29 | 3 | 5.851359 | 271.748 |
| 507 | 2017 | 0 | -3.91699 | 250.93  | 41 | 4 | 5.13138  | 158.388 |
| 508 | 2017 | 1 | -3.91699 | 250.93  | 41 | 4 | 5.13138  | 158.388 |
| 509 | 2017 | 1 | -3.11921 | 256.488 | 39 | 9 | 5.628216 | 249.682 |
| 510 | 2017 | 1 | -2.84711 | 309.225 | 43 | 4 | 5.231623 | 420.546 |
| 511 | 2017 | 1 | -5.89067 | 255.451 | 29 | 3 | 5.851359 | 271.748 |
| 512 | 2017 | 1 | -2.44569 | 267.856 | 50 | 6 | 4.747708 | 161.22  |
| 513 | 2017 | 0 | -3.37782 | 317.836 | 33 | 7 | 6.291442 | 235.771 |
| 514 | 2017 | 1 | -2.84711 | 309.225 | 43 | 4 | 5.231623 | 420.546 |
| 515 | 2017 | 0 | -3.11921 | 256.488 | 39 | 9 | 5.628216 | 249.682 |
| 516 | 2017 | 1 | -2.44569 | 267.856 | 50 | 6 | 4.747708 | 161.22  |
| 517 | 2017 | 0 | -3.11921 | 256.488 | 39 | 9 | 5.628216 | 249.682 |
| 518 | 2017 | 0 | -3.91699 | 250.93  | 41 | 4 | 5.13138  | 158.388 |
| 519 | 2017 | 0 | -6.08353 | 278.206 | 33 | 2 | 5.33728  | 208.905 |
| 520 | 2017 | 1 | -3.91699 | 250.93  | 41 | 4 | 5.13138  | 158.388 |
| 521 | 2017 | 1 | -5.89067 | 255.451 | 29 | 3 | 5.851359 | 271.748 |
| 522 | 2017 | 1 | -0.62281 | 196.601 | 50 | 9 | 5.000262 | 120.801 |
| 523 | 2017 | 1 | -3.37782 | 317.836 | 33 | 7 | 6.291442 | 235.771 |
| 524 | 2017 | 0 | -3.91699 | 250.93  | 41 | 4 | 5.13138  | 158.388 |
| 525 | 2017 | 0 | -2.43968 | 272.889 | 41 | 6 | 4.817793 | 185.432 |
| 526 | 2017 | 1 | -2.44371 | 217.816 | 48 | 5 | 4.640893 | 138.423 |
| 527 | 2017 | 1 | -0.95466 | 262.192 | 47 | 6 | 4.689568 | 144.347 |
| 528 | 2017 | 1 | -5.89067 | 255.451 | 29 | 3 | 5.851359 | 271.748 |
| 529 | 2017 | 1 | -5.89067 | 255.451 | 29 | 3 | 5.851359 | 271.748 |
| 530 | 2017 | 1 | -0.62281 | 196.601 | 50 | 9 | 5.000262 | 120.801 |
| 531 | 2017 | 0 | -4.15284 | 241.354 | 44 | 4 | 5.075255 | 165.691 |
| 532 | 2017 | 0 | -1.1028  | 254.063 | 47 | 7 | 4.569406 | 154.869 |
| 533 | 2017 | 1 | -2.76942 | 272.611 | 45 | 6 | 4.776855 | 143.822 |
| 534 | 2017 | 1 | -5.89067 | 255.451 | 29 | 3 | 5.851359 | 271.748 |
| 535 | 2017 | 0 | -4.23402 | 254.908 | 41 | 4 | 5.25069  | 174.998 |
| 536 | 2017 | 1 | -2.39007 | 261.853 | 45 | 6 | 4.668481 | 169.656 |
| 537 | 2017 | 1 | -6.08353 | 278.206 | 33 | 2 | 5.33728  | 208.905 |
| 538 | 2017 | 0 | -1.97122 | 263.819 | 46 | 9 | 5.531372 | 306.474 |
| 539 | 2017 | 0 | -4.15284 | 241.354 | 44 | 4 | 5.075255 | 165.691 |
| 540 | 2017 | 1 | -5.89067 | 255.451 | 29 | 3 | 5.851359 | 271.748 |
| 541 | 2017 | 0 | -2.19266 | 223.705 | 40 | 6 | 4.845217 | 179.86  |
| 542 | 2017 | 1 | -3.11921 | 256.488 | 39 | 9 | 5.628216 | 249.682 |
| 543 | 2017 | 0 | -4.15284 | 241.354 | 44 | 4 | 5.075255 | 165.691 |
| 544 | 2017 | 0 | -3.25281 | 268.095 | 38 | 9 | 5.634371 | 255.319 |
| 545 | 2017 | 0 | -2.19266 | 223.705 | 40 | 6 | 4.845217 | 179.86  |
| 546 | 2017 | 0 | -2.24355 | 265.847 | 46 | 6 | 4.715598 | 129.172 |
| 547 | 2017 | 0 | -4.02763 | 320.581 | 39 | 5 | 5.949704 | 283.617 |
| 548 | 2017 | 0 | -2.84711 | 309.225 | 43 | 4 | 5.231623 | 420.546 |
| 549 | 2017 | 1 | -4.23402 | 254.908 | 41 | 4 | 5.25069  | 174.998 |

Table S2 - Anonymized database

|     |      |   |          |         |    |   |          |         |
|-----|------|---|----------|---------|----|---|----------|---------|
| 550 | 2017 | 0 | -2.24355 | 265.847 | 46 | 6 | 4.715598 | 129.172 |
| 551 | 2017 | 1 | -0.62281 | 196.601 | 50 | 9 | 5.000262 | 120.801 |
| 552 | 2017 | 0 | -0.95466 | 262.192 | 47 | 6 | 4.689568 | 144.347 |
| 553 | 2017 | 0 | -6.08353 | 278.206 | 33 | 2 | 5.33728  | 208.905 |
| 554 | 2017 | 0 | -3.91699 | 250.93  | 41 | 4 | 5.13138  | 158.388 |
| 555 | 2017 | 0 | -3.91699 | 250.93  | 41 | 4 | 5.13138  | 158.388 |
| 556 | 2017 | 1 | -3.48788 | 217.594 | 44 | 5 | 5.100494 | 166.871 |
| 557 | 2017 | 0 | -4.15284 | 241.354 | 44 | 4 | 5.075255 | 165.691 |
| 558 | 2017 | 0 | -6.27829 | 280.736 | 29 | 1 | 5.385093 | 166.786 |
| 559 | 2017 | 1 | -4.36069 | 255.949 | 42 | 3 | 5.219447 | 199.134 |
| 560 | 2017 | 1 | -1.74724 | 252.738 | 44 | 6 | 4.710191 | 185.309 |
| 561 | 2017 | 1 | -3.91699 | 250.93  | 41 | 4 | 5.13138  | 158.388 |
| 562 | 2017 | 0 | -4.36069 | 255.949 | 42 | 3 | 5.219447 | 199.134 |
| 563 | 2017 | 0 | -3.25281 | 268.095 | 38 | 9 | 5.634371 | 255.319 |
| 564 | 2017 | 1 | -4.36069 | 255.949 | 42 | 3 | 5.219447 | 199.134 |
| 565 | 2017 | 0 | -4.02763 | 320.581 | 39 | 5 | 5.949704 | 283.617 |
| 566 | 2017 | 1 | -2.44371 | 217.816 | 48 | 5 | 4.640893 | 138.423 |
| 567 | 2017 | 1 | -2.19266 | 223.705 | 40 | 6 | 4.845217 | 179.86  |
| 568 | 2017 | 0 | -3.25281 | 268.095 | 38 | 9 | 5.634371 | 255.319 |
| 569 | 2017 | 0 | -4.41719 | 332.607 | 34 | 4 | 5.723377 | 344.114 |
| 570 | 2017 | 1 | -2.50998 | 260.164 | 44 | 6 | 4.736388 | 137.96  |
| 571 | 2017 | 1 | -3.91699 | 250.93  | 41 | 4 | 5.13138  | 158.388 |
| 572 | 2017 | 0 | -6.08353 | 278.206 | 33 | 2 | 5.33728  | 208.905 |
| 573 | 2017 | 1 | -2.19266 | 223.705 | 40 | 6 | 4.845217 | 179.86  |
| 574 | 2017 | 0 | -2.43968 | 272.889 | 41 | 6 | 4.817793 | 185.432 |
| 575 | 2017 | 0 | -3.25281 | 268.095 | 38 | 9 | 5.634371 | 255.319 |
| 576 | 2017 | 0 | -6.27829 | 280.736 | 29 | 1 | 5.385093 | 166.786 |
| 577 | 2017 | 1 | -1.71027 | 266.643 | 43 | 7 | 4.556356 | 157.905 |
| 578 | 2017 | 1 | -5.89067 | 255.451 | 29 | 3 | 5.851359 | 271.748 |
| 579 | 2017 | 1 | -4.71991 | 235.65  | 40 | 4 | 5.499929 | 190.248 |
| 580 | 2017 | 1 | -3.91699 | 250.93  | 41 | 4 | 5.13138  | 158.388 |
| 581 | 2017 | 0 | -2.43968 | 272.889 | 41 | 6 | 4.817793 | 185.432 |
| 582 | 2017 | 0 | -3.91699 | 250.93  | 41 | 4 | 5.13138  | 158.388 |
| 583 | 2017 | 1 | -3.37782 | 317.836 | 33 | 7 | 6.291442 | 235.771 |
| 584 | 2017 | 0 | -0.62281 | 196.601 | 50 | 9 | 5.000262 | 120.801 |
| 585 | 2017 | 0 | -4.15284 | 241.354 | 44 | 4 | 5.075255 | 165.691 |
| 586 | 2017 | 0 | -3.91699 | 250.93  | 41 | 4 | 5.13138  | 158.388 |
| 587 | 2017 | 0 | -2.40715 | 236.684 | 50 | 4 | 4.60509  | 201.376 |
| 588 | 2017 | 0 | -4.41719 | 332.607 | 34 | 4 | 5.723377 | 344.114 |
| 589 | 2017 | 0 | -5.50916 | 271.421 | 28 | 4 | 5.703766 | 245.691 |
| 590 | 2017 | 1 | -2.50998 | 260.164 | 44 | 6 | 4.736388 | 137.96  |
| 591 | 2017 | 0 | -6.27829 | 280.736 | 29 | 1 | 5.385093 | 166.786 |
| 592 | 2017 | 1 | -1.67815 | 243.274 | 42 | 6 | 4.674064 | 172.809 |
| 593 | 2017 | 0 | -3.91699 | 250.93  | 41 | 4 | 5.13138  | 158.388 |
| 594 | 2017 | 0 | -3.25281 | 268.095 | 38 | 9 | 5.634371 | 255.319 |
| 595 | 2017 | 1 | -3.48788 | 217.594 | 44 | 5 | 5.100494 | 166.871 |
| 596 | 2017 | 1 | -3.11921 | 256.488 | 39 | 9 | 5.628216 | 249.682 |
| 597 | 2017 | 0 | -5.50916 | 271.421 | 28 | 4 | 5.703766 | 245.691 |
| 598 | 2017 | 1 | -5.89067 | 255.451 | 29 | 3 | 5.851359 | 271.748 |
| 599 | 2017 | 0 | -2.84711 | 309.225 | 43 | 4 | 5.231623 | 420.546 |



Table S2 - Anonymized database

|     |      |   |          |         |    |    |          |         |
|-----|------|---|----------|---------|----|----|----------|---------|
| 600 | 2017 | 1 | -3.48788 | 217.594 | 44 | 5  | 5.100494 | 166.871 |
| 601 | 2017 | 0 | -2.24355 | 265.847 | 46 | 6  | 4.715598 | 129.172 |
| 602 | 2017 | 1 | -3.25281 | 268.095 | 38 | 9  | 5.634371 | 255.319 |
| 603 | 2017 | 1 | -3.91699 | 250.93  | 41 | 4  | 5.13138  | 158.388 |
| 604 | 2017 | 0 | -4.71991 | 235.65  | 40 | 4  | 5.499929 | 190.248 |
| 605 | 2017 | 1 | -2.50998 | 260.164 | 44 | 6  | 4.736388 | 137.96  |
| 606 | 2017 | 0 | -3.92423 | 344.363 | 34 | 3  | 5.911061 | 339.89  |
| 607 | 2017 | 0 | -3.91699 | 250.93  | 41 | 4  | 5.13138  | 158.388 |
| 608 | 2017 | 0 | -2.43968 | 272.889 | 41 | 6  | 4.817793 | 185.432 |
| 609 | 2017 | 1 | -3.91699 | 250.93  | 41 | 4  | 5.13138  | 158.388 |
| 610 | 2017 | 0 | -0.62281 | 196.601 | 50 | 9  | 5.000262 | 120.801 |
| 611 | 2017 | 0 | -4.41719 | 332.607 | 34 | 4  | 5.723377 | 344.114 |
| 612 | 2017 | 0 | -0.82113 | 231.405 | 47 | 7  | 4.717594 | 179.124 |
| 613 | 2017 | 1 | -1.1028  | 254.063 | 47 | 7  | 4.569406 | 154.869 |
| 614 | 2017 | 0 | -4.71991 | 235.65  | 40 | 4  | 5.499929 | 190.248 |
| 615 | 2017 | 1 | -2.84711 | 309.225 | 43 | 4  | 5.231623 | 420.546 |
| 616 | 2017 | 1 | -3.48788 | 217.594 | 44 | 5  | 5.100494 | 166.871 |
| 617 | 2017 | 0 | -3.91699 | 250.93  | 41 | 4  | 5.13138  | 158.388 |
| 618 | 2017 | 0 | -2.44569 | 267.856 | 50 | 6  | 4.747708 | 161.22  |
| 619 | 2017 | 0 | -6.27829 | 280.736 | 29 | 1  | 5.385093 | 166.786 |
| 620 | 2017 | 1 | -2.44569 | 267.856 | 50 | 6  | 4.747708 | 161.22  |
| 621 | 2017 | 1 | -2.34964 | 250.488 | 43 | 8  | 5.578132 | 205.594 |
| 622 | 2017 | 0 | -4.15284 | 241.354 | 44 | 4  | 5.075255 | 165.691 |
| 623 | 2017 | 1 | -1.71027 | 266.643 | 43 | 7  | 4.556356 | 157.905 |
| 624 | 2017 | 0 | -3.11921 | 256.488 | 39 | 9  | 5.628216 | 249.682 |
| 625 | 2017 | 1 | -2.85334 | 264.701 | 39 | 10 | 5.700035 | 238.075 |
| 626 | 2017 | 1 | -4.71991 | 235.65  | 40 | 4  | 5.499929 | 190.248 |
| 627 | 2017 | 1 | -3.37782 | 317.836 | 33 | 7  | 6.291442 | 235.771 |
| 628 | 2017 | 0 | -2.54548 | 206.109 | 50 | 4  | 4.652779 | 173.933 |
| 629 | 2017 | 1 | -3.91699 | 250.93  | 41 | 4  | 5.13138  | 158.388 |
| 630 | 2017 | 0 | -6.27829 | 280.736 | 29 | 1  | 5.385093 | 166.786 |
| 631 | 2017 | 1 | -2.50998 | 260.164 | 44 | 6  | 4.736388 | 137.96  |
| 632 | 2017 | 0 | -1.9847  | 238.16  | 43 | 6  | 4.704746 | 134.217 |
| 633 | 2017 | 1 | -1.67815 | 243.274 | 42 | 6  | 4.674064 | 172.809 |
| 634 | 2017 | 0 | -4.15284 | 241.354 | 44 | 4  | 5.075255 | 165.691 |
| 635 | 2017 | 1 | -4.41719 | 332.607 | 34 | 4  | 5.723377 | 344.114 |
| 636 | 2017 | 0 | -6.08353 | 278.206 | 33 | 2  | 5.33728  | 208.905 |
| 637 | 2017 | 0 | -3.82073 | 260.689 | 43 | 3  | 5.227614 | 191.46  |
| 638 | 2017 | 0 | -6.08353 | 278.206 | 33 | 2  | 5.33728  | 208.905 |
| 639 | 2017 | 0 | -2.33675 | 267.894 | 48 | 6  | 4.748405 | 160.053 |
| 640 | 2018 | 0 | -6.88819 | 301.882 | 29 | 2  | 6.529027 | 195.725 |
| 641 | 2018 | 1 | -8.27169 | 305.458 | 25 | 2  | 6.790788 | 190.623 |
| 642 | 2018 | 0 | -6.58408 | 381.708 | 16 | 3  | 7.864085 | 312.963 |
| 643 | 2018 | 1 | -5.90725 | 366.045 | 21 | 2  | 7.512705 | 252.161 |
| 644 | 2018 | 1 | -5.77559 | 374.622 | 16 | 2  | 7.911587 | 269.805 |
| 645 | 2018 | 1 | -6.20356 | 372.322 | 21 | 2  | 7.571872 | 272.363 |
| 646 | 2018 | 1 | -6.48333 | 394.557 | 17 | 3  | 7.808361 | 262.725 |
| 647 | 2018 | 1 | -6.88819 | 301.882 | 29 | 2  | 6.529027 | 195.725 |
| 648 | 2018 | 1 | -4.25138 | 245.162 | 33 | 1  | 5.949284 | 183.973 |
| 649 | 2018 | 0 | -6.88819 | 301.882 | 29 | 2  | 6.529027 | 195.725 |

Table S2 - Anonymized database

|     |      |   |          |         |    |   |          |         |
|-----|------|---|----------|---------|----|---|----------|---------|
| 650 | 2018 | 1 | -6.49495 | 310.095 | 24 | 1 | 6.916134 | 351.541 |
| 651 | 2018 | 1 | -7.39365 | 313.661 | 20 | 2 | 7.515178 | 245.655 |
| 652 | 2018 | 0 | -6.58408 | 381.708 | 16 | 3 | 7.864085 | 312.963 |
| 653 | 2018 | 1 | -6.48333 | 394.557 | 17 | 3 | 7.808361 | 262.725 |
| 654 | 2018 | 0 | -4.87848 | 263.795 | 31 | 3 | 5.976067 | 224.208 |
| 655 | 2018 | 0 | -6.48333 | 394.557 | 17 | 3 | 7.808361 | 262.725 |
| 656 | 2018 | 1 | -7.39365 | 313.661 | 20 | 2 | 7.515178 | 245.655 |
| 657 | 2018 | 1 | -7.82124 | 334.567 | 18 | 1 | 7.513873 | 250.932 |
| 658 | 2018 | 1 | -4.617   | 272.42  | 34 | 2 | 5.883047 | 224.837 |
| 659 | 2018 | 1 | -6.88819 | 301.882 | 29 | 2 | 6.529027 | 195.725 |
| 660 | 2018 | 1 | -8.65423 | 308.168 | 20 | 2 | 7.117683 | 236.414 |
| 661 | 2018 | 1 | -4.617   | 272.42  | 34 | 2 | 5.883047 | 224.837 |
| 662 | 2018 | 1 | -6.48333 | 394.557 | 17 | 3 | 7.808361 | 262.725 |
| 663 | 2018 | 0 | -8.27169 | 305.458 | 25 | 2 | 6.790788 | 190.623 |
| 664 | 2018 | 0 | -4.793   | 281.388 | 34 | 3 | 6.025163 | 214.309 |
| 665 | 2018 | 1 | -7.39365 | 313.661 | 20 | 2 | 7.515178 | 245.655 |
| 666 | 2018 | 0 | -4.87848 | 263.795 | 31 | 3 | 5.976067 | 224.208 |
| 667 | 2018 | 1 | -4.617   | 272.42  | 34 | 2 | 5.883047 | 224.837 |
| 668 | 2018 | 1 | -4.617   | 272.42  | 34 | 2 | 5.883047 | 224.837 |
| 669 | 2018 | 1 | -5.02796 | 330.199 | 33 | 2 | 5.989155 | 220.014 |
| 670 | 2018 | 0 | -6.90174 | 306.527 | 25 | 3 | 6.60448  | 168.631 |
| 671 | 2018 | 0 | -9.06615 | 295.1   | 24 | 1 | 6.91996  | 180.283 |
| 672 | 2018 | 1 | -7.81114 | 353.792 | 19 | 2 | 7.937767 | 285.335 |
| 673 | 2018 | 1 | -5.36521 | 366.405 | 27 | 2 | 7.461253 | 266.411 |
| 674 | 2018 | 1 | -7.39365 | 313.661 | 20 | 2 | 7.515178 | 245.655 |
| 675 | 2018 | 0 | -5.02252 | 263.153 | 27 | 3 | 6.894613 | 267.039 |
| 676 | 2018 | 0 | -6.88819 | 301.882 | 29 | 2 | 6.529027 | 195.725 |
| 677 | 2018 | 0 | -7.07599 | 282.616 | 29 | 2 | 6.611127 | 164.806 |
| 678 | 2018 | 1 | -3.97457 | 269.805 | 34 | 2 | 5.878606 | 179.97  |
| 679 | 2018 | 1 | -5.02796 | 330.199 | 33 | 2 | 5.989155 | 220.014 |
| 680 | 2018 | 1 | -9.06615 | 295.1   | 24 | 1 | 6.91996  | 180.283 |
| 681 | 2018 | 0 | -6.58408 | 381.708 | 16 | 3 | 7.864085 | 312.963 |
| 682 | 2018 | 1 | -4.87848 | 263.795 | 31 | 3 | 5.976067 | 224.208 |
| 683 | 2018 | 1 | -7.39365 | 313.661 | 20 | 2 | 7.515178 | 245.655 |
| 684 | 2018 | 1 | -4.87848 | 263.795 | 31 | 3 | 5.976067 | 224.208 |
| 685 | 2018 | 0 | -5.14502 | 320.559 | 29 | 3 | 6.399948 | 186.715 |
| 686 | 2018 | 1 | -6.30913 | 329.647 | 29 | 2 | 6.266621 | 226.935 |
| 687 | 2018 | 1 | -7.07599 | 282.616 | 29 | 2 | 6.611127 | 164.806 |
| 688 | 2018 | 1 | -7.20009 | 364.583 | 20 | 2 | 7.820609 | 262.127 |
| 689 | 2018 | 1 | -4.87848 | 263.795 | 31 | 3 | 5.976067 | 224.208 |
| 690 | 2018 | 1 | -6.48333 | 394.557 | 17 | 3 | 7.808361 | 262.725 |
| 691 | 2018 | 1 | -4.37908 | 311.745 | 32 | 1 | 6.1943   | 204.526 |
| 692 | 2018 | 1 | -5.14502 | 320.559 | 29 | 3 | 6.399948 | 186.715 |
| 693 | 2018 | 1 | -4.87848 | 263.795 | 31 | 3 | 5.976067 | 224.208 |
| 694 | 2018 | 1 | -4.617   | 272.42  | 34 | 2 | 5.883047 | 224.837 |
| 695 | 2018 | 0 | -7.82124 | 334.567 | 18 | 1 | 7.513873 | 250.932 |
| 696 | 2018 | 1 | -4.617   | 272.42  | 34 | 2 | 5.883047 | 224.837 |
| 697 | 2018 | 1 | -5.39716 | 365.214 | 28 | 2 | 7.43428  | 266.66  |
| 698 | 2018 | 1 | -6.30913 | 329.647 | 29 | 2 | 6.266621 | 226.935 |
| 699 | 2018 | 0 | -6.58408 | 381.708 | 16 | 3 | 7.864085 | 312.963 |

Table S2 - Anonymized database

|     |      |   |          |         |    |   |          |         |
|-----|------|---|----------|---------|----|---|----------|---------|
| 700 | 2018 | 1 | -4.25138 | 245.162 | 33 | 1 | 5.949284 | 183.973 |
| 701 | 2018 | 1 | -4.37908 | 311.745 | 32 | 1 | 6.1943   | 204.526 |
| 702 | 2018 | 1 | -5.69859 | 365.818 | 22 | 2 | 7.792316 | 251.577 |
| 703 | 2018 | 1 | -4.87848 | 263.795 | 31 | 3 | 5.976067 | 224.208 |
| 704 | 2018 | 1 | -9.06615 | 295.1   | 24 | 1 | 6.91996  | 180.283 |
| 705 | 2018 | 1 | -4.92368 | 249.868 | 27 | 2 | 6.349614 | 181.04  |
| 706 | 2018 | 1 | -6.48333 | 394.557 | 17 | 3 | 7.808361 | 262.725 |
| 707 | 2018 | 0 | -6.75184 | 351.38  | 15 | 2 | 7.815742 | 280.961 |
| 708 | 2018 | 1 | -5.69859 | 365.818 | 22 | 2 | 7.792316 | 251.577 |
| 709 | 2018 | 1 | -4.617   | 272.42  | 34 | 2 | 5.883047 | 224.837 |
| 710 | 2018 | 1 | -7.39365 | 313.661 | 20 | 2 | 7.515178 | 245.655 |
| 711 | 2018 | 1 | -5.39716 | 365.214 | 28 | 2 | 7.43428  | 266.66  |
| 712 | 2018 | 0 | -6.49495 | 310.095 | 24 | 1 | 6.916134 | 351.541 |
| 713 | 2018 | 0 | -7.94169 | 345.115 | 18 | 2 | 7.964071 | 283.577 |
| 714 | 2018 | 0 | -4.16202 | 331.251 | 33 | 2 | 6.285675 | 190.878 |
| 715 | 2018 | 1 | -9.06615 | 295.1   | 24 | 1 | 6.91996  | 180.283 |
| 716 | 2018 | 0 | -5.50224 | 229.409 | 26 | 3 | 6.216757 | 249.32  |
| 717 | 2018 | 1 | -9.06615 | 295.1   | 24 | 1 | 6.91996  | 180.283 |
| 718 | 2018 | 0 | -5.1982  | 337.653 | 28 | 2 | 6.180266 | 218.816 |
| 719 | 2018 | 1 | -5.90725 | 366.045 | 21 | 2 | 7.512705 | 252.161 |
| 720 | 2018 | 1 | -5.02796 | 330.199 | 33 | 2 | 5.989155 | 220.014 |
| 721 | 2018 | 1 | -6.25511 | 348.549 | 20 | 3 | 7.64078  | 284.237 |
| 722 | 2018 | 1 | -6.21015 | 363.865 | 21 | 2 | 7.552881 | 264.371 |
| 723 | 2018 | 0 | -7.43247 | 332.114 | 25 | 3 | 6.71717  | 208.137 |
| 724 | 2018 | 1 | -4.617   | 272.42  | 34 | 2 | 5.883047 | 224.837 |
| 725 | 2018 | 0 | -5.1982  | 337.653 | 28 | 2 | 6.180266 | 218.816 |
| 726 | 2018 | 1 | -5.02796 | 330.199 | 33 | 2 | 5.989155 | 220.014 |
| 727 | 2018 | 0 | -6.58408 | 381.708 | 16 | 3 | 7.864085 | 312.963 |
| 728 | 2018 | 1 | -4.87848 | 263.795 | 31 | 3 | 5.976067 | 224.208 |
| 729 | 2018 | 1 | -6.48333 | 394.557 | 17 | 3 | 7.808361 | 262.725 |
| 730 | 2018 | 1 | -4.89354 | 249.698 | 28 | 3 | 6.306965 | 191.885 |
| 731 | 2018 | 0 | -6.30913 | 329.647 | 29 | 2 | 6.266621 | 226.935 |
| 732 | 2018 | 0 | -4.92368 | 249.868 | 27 | 2 | 6.349614 | 181.04  |
| 733 | 2018 | 1 | -8.36164 | 232.982 | 28 | 1 | 6.739847 | 155.565 |
| 734 | 2018 | 1 | -5.14502 | 320.559 | 29 | 3 | 6.399948 | 186.715 |
| 735 | 2018 | 1 | -4.92368 | 249.868 | 27 | 2 | 6.349614 | 181.04  |
| 736 | 2018 | 1 | -6.21015 | 363.865 | 21 | 2 | 7.552881 | 264.371 |
| 737 | 2018 | 0 | -4.92368 | 249.868 | 27 | 2 | 6.349614 | 181.04  |
| 738 | 2018 | 1 | -4.617   | 272.42  | 34 | 2 | 5.883047 | 224.837 |
| 739 | 2018 | 1 | -6.88819 | 301.882 | 29 | 2 | 6.529027 | 195.725 |
| 740 | 2018 | 1 | -6.88819 | 301.882 | 29 | 2 | 6.529027 | 195.725 |
| 741 | 2018 | 1 | -6.88819 | 301.882 | 29 | 2 | 6.529027 | 195.725 |
| 742 | 2018 | 1 | -9.06615 | 295.1   | 24 | 1 | 6.91996  | 180.283 |
| 743 | 2018 | 1 | -6.58408 | 381.708 | 16 | 3 | 7.864085 | 312.963 |
| 744 | 2018 | 0 | -5.57762 | 322.333 | 30 | 2 | 6.382592 | 213.469 |
| 745 | 2018 | 0 | -4.617   | 272.42  | 34 | 2 | 5.883047 | 224.837 |
| 746 | 2018 | 0 | -4.25138 | 245.162 | 33 | 1 | 5.949284 | 183.973 |
| 747 | 2018 | 1 | -5.36521 | 366.405 | 27 | 2 | 7.461253 | 266.411 |
| 748 | 2018 | 0 | -6.48333 | 394.557 | 17 | 3 | 7.808361 | 262.725 |
| 749 | 2018 | 0 | -7.07599 | 282.616 | 29 | 2 | 6.611127 | 164.806 |

Table S2 - Anonymized database

|     |      |   |          |         |    |   |          |         |
|-----|------|---|----------|---------|----|---|----------|---------|
| 750 | 2018 | 1 | -4.617   | 272.42  | 34 | 2 | 5.883047 | 224.837 |
| 751 | 2018 | 0 | -6.58408 | 381.708 | 16 | 3 | 7.864085 | 312.963 |
| 752 | 2018 | 1 | -4.617   | 272.42  | 34 | 2 | 5.883047 | 224.837 |
| 753 | 2018 | 1 | -5.69859 | 365.818 | 22 | 2 | 7.792316 | 251.577 |
| 754 | 2018 | 0 | -4.92368 | 249.868 | 27 | 2 | 6.349614 | 181.04  |
| 755 | 2018 | 1 | -6.21015 | 363.865 | 21 | 2 | 7.552881 | 264.371 |
| 756 | 2018 | 1 | -4.00785 | 282.449 | 33 | 2 | 6.290476 | 177.442 |
| 757 | 2018 | 0 | -6.49495 | 310.095 | 24 | 1 | 6.916134 | 351.541 |
| 758 | 2018 | 0 | -6.49495 | 310.095 | 24 | 1 | 6.916134 | 351.541 |
| 759 | 2018 | 1 | -6.21015 | 363.865 | 21 | 2 | 7.552881 | 264.371 |
| 760 | 2018 | 0 | -6.88819 | 301.882 | 29 | 2 | 6.529027 | 195.725 |
| 761 | 2018 | 0 | -5.44999 | 360.827 | 25 | 2 | 7.2608   | 247.862 |
| 762 | 2018 | 1 | -6.30913 | 329.647 | 29 | 2 | 6.266621 | 226.935 |
| 763 | 2018 | 0 | -7.07599 | 282.616 | 29 | 2 | 6.611127 | 164.806 |
| 764 | 2018 | 0 | -7.55909 | 356.968 | 19 | 1 | 7.863856 | 261.97  |
| 765 | 2018 | 1 | -4.617   | 272.42  | 34 | 2 | 5.883047 | 224.837 |
| 766 | 2018 | 1 | -6.48333 | 394.557 | 17 | 3 | 7.808361 | 262.725 |
| 767 | 2018 | 0 | -5.1961  | 326.94  | 31 | 2 | 6.173674 | 222.067 |
| 768 | 2018 | 1 | -7.39365 | 313.661 | 20 | 2 | 7.515178 | 245.655 |
| 769 | 2018 | 1 | -5.02796 | 330.199 | 33 | 2 | 5.989155 | 220.014 |
| 770 | 2018 | 0 | -6.88819 | 301.882 | 29 | 2 | 6.529027 | 195.725 |
| 771 | 2018 | 0 | -4.87848 | 263.795 | 31 | 3 | 5.976067 | 224.208 |
| 772 | 2018 | 1 | -6.25511 | 348.549 | 20 | 3 | 7.64078  | 284.237 |
| 773 | 2018 | 1 | -4.87848 | 263.795 | 31 | 3 | 5.976067 | 224.208 |
| 774 | 2018 | 1 | -5.39716 | 365.214 | 28 | 2 | 7.43428  | 266.66  |
| 775 | 2018 | 1 | -7.82124 | 334.567 | 18 | 1 | 7.513873 | 250.932 |
| 776 | 2018 | 1 | -4.617   | 272.42  | 34 | 2 | 5.883047 | 224.837 |
| 777 | 2018 | 1 | -5.14502 | 320.559 | 29 | 3 | 6.399948 | 186.715 |
| 778 | 2018 | 1 | -4.87848 | 263.795 | 31 | 3 | 5.976067 | 224.208 |
| 779 | 2018 | 1 | -6.21015 | 363.865 | 21 | 2 | 7.552881 | 264.371 |
| 780 | 2018 | 1 | -6.88819 | 301.882 | 29 | 2 | 6.529027 | 195.725 |
| 781 | 2018 | 1 | -5.77559 | 374.622 | 16 | 2 | 7.911587 | 269.805 |
| 782 | 2018 | 1 | -4.87848 | 263.795 | 31 | 3 | 5.976067 | 224.208 |
| 783 | 2018 | 1 | -4.617   | 272.42  | 34 | 2 | 5.883047 | 224.837 |
| 784 | 2018 | 1 | -4.617   | 272.42  | 34 | 2 | 5.883047 | 224.837 |
| 785 | 2018 | 1 | -8.36164 | 232.982 | 28 | 1 | 6.739847 | 155.565 |
| 786 | 2018 | 1 | -9.06615 | 295.1   | 24 | 1 | 6.91996  | 180.283 |
| 787 | 2018 | 1 | -4.617   | 272.42  | 34 | 2 | 5.883047 | 224.837 |
| 788 | 2018 | 1 | -7.86677 | 355.888 | 20 | 1 | 7.928198 | 277.851 |
| 789 | 2018 | 1 | -4.87848 | 263.795 | 31 | 3 | 5.976067 | 224.208 |
| 790 | 2018 | 1 | -4.74038 | 330.101 | 31 | 2 | 6.290736 | 216.878 |
| 791 | 2018 | 1 | -5.02796 | 330.199 | 33 | 2 | 5.989155 | 220.014 |
| 792 | 2018 | 1 | -5.02796 | 330.199 | 33 | 2 | 5.989155 | 220.014 |
| 793 | 2018 | 0 | -6.58408 | 381.708 | 16 | 3 | 7.864085 | 312.963 |
| 794 | 2018 | 1 | -4.617   | 272.42  | 34 | 2 | 5.883047 | 224.837 |
| 795 | 2018 | 0 | -6.58408 | 381.708 | 16 | 3 | 7.864085 | 312.963 |
| 796 | 2018 | 1 | -6.21015 | 363.865 | 21 | 2 | 7.552881 | 264.371 |
| 797 | 2018 | 1 | -6.75184 | 351.38  | 15 | 2 | 7.815742 | 280.961 |
| 798 | 2018 | 0 | -6.58408 | 381.708 | 16 | 3 | 7.864085 | 312.963 |
| 799 | 2018 | 1 | -4.617   | 272.42  | 34 | 2 | 5.883047 | 224.837 |

Table S2 - Anonymized database

|     |      |   |          |         |    |   |          |         |
|-----|------|---|----------|---------|----|---|----------|---------|
| 800 | 2018 | 1 | -4.87848 | 263.795 | 31 | 3 | 5.976067 | 224.208 |
| 801 | 2018 | 1 | -6.21015 | 363.865 | 21 | 2 | 7.552881 | 264.371 |
| 802 | 2018 | 1 | -5.44999 | 360.827 | 25 | 2 | 7.2608   | 247.862 |
| 803 | 2018 | 1 | -7.07599 | 282.616 | 29 | 2 | 6.611127 | 164.806 |
| 804 | 2018 | 1 | -4.87848 | 263.795 | 31 | 3 | 5.976067 | 224.208 |
| 805 | 2018 | 1 | -4.87848 | 263.795 | 31 | 3 | 5.976067 | 224.208 |
| 806 | 2018 | 1 | -7.20009 | 364.583 | 20 | 2 | 7.820609 | 262.127 |
| 807 | 2018 | 1 | -5.69859 | 365.818 | 22 | 2 | 7.792316 | 251.577 |
| 808 | 2018 | 1 | -6.30913 | 329.647 | 29 | 2 | 6.266621 | 226.935 |
| 809 | 2018 | 0 | -5.44999 | 360.827 | 25 | 2 | 7.2608   | 247.862 |
| 810 | 2018 | 0 | -4.92368 | 249.868 | 27 | 2 | 6.349614 | 181.04  |
| 811 | 2018 | 1 | -5.02796 | 330.199 | 33 | 2 | 5.989155 | 220.014 |
| 812 | 2018 | 1 | -8.08821 | 336.689 | 17 | 1 | 7.084207 | 282.846 |
| 813 | 2018 | 1 | -5.90725 | 366.045 | 21 | 2 | 7.512705 | 252.161 |
| 814 | 2018 | 1 | -5.14502 | 320.559 | 29 | 3 | 6.399948 | 186.715 |
| 815 | 2018 | 1 | -8.65423 | 308.168 | 20 | 2 | 7.117683 | 236.414 |
| 816 | 2018 | 1 | -7.81114 | 353.792 | 19 | 2 | 7.937767 | 285.335 |
| 817 | 2018 | 1 | -5.77559 | 374.622 | 16 | 2 | 7.911587 | 269.805 |
| 818 | 2018 | 1 | -4.87848 | 263.795 | 31 | 3 | 5.976067 | 224.208 |
| 819 | 2018 | 1 | -6.33545 | 385.796 | 20 | 2 | 7.653489 | 281.62  |
| 820 | 2018 | 1 | -7.20009 | 364.583 | 20 | 2 | 7.820609 | 262.127 |
| 821 | 2018 | 1 | -6.25511 | 348.549 | 20 | 3 | 7.64078  | 284.237 |
| 822 | 2018 | 1 | -6.49495 | 310.095 | 24 | 1 | 6.916134 | 351.541 |
| 823 | 2018 | 1 | -4.87848 | 263.795 | 31 | 3 | 5.976067 | 224.208 |
| 824 | 2018 | 1 | -6.88819 | 301.882 | 29 | 2 | 6.529027 | 195.725 |
| 825 | 2018 | 1 | -7.86677 | 355.888 | 20 | 1 | 7.928198 | 277.851 |
| 826 | 2018 | 1 | -5.39716 | 365.214 | 28 | 2 | 7.43428  | 266.66  |
| 827 | 2018 | 0 | -4.92368 | 249.868 | 27 | 2 | 6.349614 | 181.04  |
| 828 | 2018 | 1 | -5.02796 | 330.199 | 33 | 2 | 5.989155 | 220.014 |
| 829 | 2018 | 0 | -7.20009 | 364.583 | 20 | 2 | 7.820609 | 262.127 |
| 830 | 2018 | 1 | -7.20009 | 364.583 | 20 | 2 | 7.820609 | 262.127 |
| 831 | 2018 | 1 | -6.30913 | 329.647 | 29 | 2 | 6.266621 | 226.935 |
| 832 | 2018 | 1 | -6.21015 | 363.865 | 21 | 2 | 7.552881 | 264.371 |
| 833 | 2018 | 1 | -6.88819 | 301.882 | 29 | 2 | 6.529027 | 195.725 |
| 834 | 2018 | 1 | -7.81114 | 353.792 | 19 | 2 | 7.937767 | 285.335 |
| 835 | 2018 | 1 | -4.617   | 272.42  | 34 | 2 | 5.883047 | 224.837 |
| 836 | 2018 | 1 | -6.48333 | 394.557 | 17 | 3 | 7.808361 | 262.725 |
| 837 | 2018 | 1 | -7.39365 | 313.661 | 20 | 2 | 7.515178 | 245.655 |
| 838 | 2018 | 1 | -7.20009 | 364.583 | 20 | 2 | 7.820609 | 262.127 |
| 839 | 2018 | 0 | -4.92368 | 249.868 | 27 | 2 | 6.349614 | 181.04  |
| 840 | 2018 | 1 | -5.14502 | 320.559 | 29 | 3 | 6.399948 | 186.715 |
| 841 | 2018 | 0 | -4.617   | 272.42  | 34 | 2 | 5.883047 | 224.837 |
| 842 | 2018 | 1 | -5.77559 | 374.622 | 16 | 2 | 7.911587 | 269.805 |
| 843 | 2018 | 1 | -6.88819 | 301.882 | 29 | 2 | 6.529027 | 195.725 |
| 844 | 2018 | 1 | -7.82124 | 334.567 | 18 | 1 | 7.513873 | 250.932 |
| 845 | 2018 | 1 | -4.617   | 272.42  | 34 | 2 | 5.883047 | 224.837 |
| 846 | 2018 | 1 | -6.88819 | 301.882 | 29 | 2 | 6.529027 | 195.725 |
| 847 | 2018 | 1 | -4.87848 | 263.795 | 31 | 3 | 5.976067 | 224.208 |
| 848 | 2018 | 0 | -6.88819 | 301.882 | 29 | 2 | 6.529027 | 195.725 |
| 849 | 2018 | 1 | -6.88819 | 301.882 | 29 | 2 | 6.529027 | 195.725 |

Table S2 - Anonymized database

|     |      |   |          |         |    |   |          |         |
|-----|------|---|----------|---------|----|---|----------|---------|
| 850 | 2018 | 1 | -5.90725 | 366.045 | 21 | 2 | 7.512705 | 252.161 |
| 851 | 2018 | 1 | -7.39365 | 313.661 | 20 | 2 | 7.515178 | 245.655 |
| 852 | 2018 | 0 | -6.58408 | 381.708 | 16 | 3 | 7.864085 | 312.963 |
| 853 | 2018 | 1 | -6.30913 | 329.647 | 29 | 2 | 6.266621 | 226.935 |
| 854 | 2018 | 1 | -4.92368 | 249.868 | 27 | 2 | 6.349614 | 181.04  |
| 855 | 2018 | 0 | -4.617   | 272.42  | 34 | 2 | 5.883047 | 224.837 |
| 856 | 2018 | 0 | -8.27169 | 305.458 | 25 | 2 | 6.790788 | 190.623 |
| 857 | 2018 | 1 | -5.90725 | 366.045 | 21 | 2 | 7.512705 | 252.161 |
| 858 | 2018 | 0 | -7.39365 | 313.661 | 20 | 2 | 7.515178 | 245.655 |
| 859 | 2018 | 1 | -4.28441 | 244.851 | 29 | 2 | 6.183555 | 181.364 |
| 860 | 2018 | 1 | -4.4763  | 261.526 | 31 | 2 | 5.876564 | 215.879 |
| 861 | 2018 | 1 | -4.617   | 272.42  | 34 | 2 | 5.883047 | 224.837 |
| 862 | 2018 | 0 | -6.88819 | 301.882 | 29 | 2 | 6.529027 | 195.725 |
| 863 | 2018 | 0 | -6.58408 | 381.708 | 16 | 3 | 7.864085 | 312.963 |
| 864 | 2018 | 1 | -4.53398 | 301.064 | 30 | 1 | 6.283117 | 206.422 |
| 865 | 2018 | 0 | -4.87848 | 263.795 | 31 | 3 | 5.976067 | 224.208 |
| 866 | 2018 | 1 | -7.39365 | 313.661 | 20 | 2 | 7.515178 | 245.655 |
| 867 | 2018 | 1 | -4.87848 | 263.795 | 31 | 3 | 5.976067 | 224.208 |
| 868 | 2018 | 0 | -4.92368 | 249.868 | 27 | 2 | 6.349614 | 181.04  |
| 869 | 2018 | 1 | -6.88819 | 301.882 | 29 | 2 | 6.529027 | 195.725 |
| 870 | 2018 | 1 | -6.88819 | 301.882 | 29 | 2 | 6.529027 | 195.725 |
| 871 | 2018 | 1 | -4.87848 | 263.795 | 31 | 3 | 5.976067 | 224.208 |
| 872 | 2018 | 0 | -5.02796 | 330.199 | 33 | 2 | 5.989155 | 220.014 |
| 873 | 2018 | 1 | -5.02796 | 330.199 | 33 | 2 | 5.989155 | 220.014 |
| 874 | 2018 | 1 | -6.33545 | 385.796 | 20 | 2 | 7.653489 | 281.62  |
| 875 | 2018 | 1 | -7.20009 | 364.583 | 20 | 2 | 7.820609 | 262.127 |
| 876 | 2018 | 1 | -4.87848 | 263.795 | 31 | 3 | 5.976067 | 224.208 |
| 877 | 2018 | 0 | -7.07599 | 282.616 | 29 | 2 | 6.611127 | 164.806 |
| 878 | 2018 | 0 | -4.92368 | 249.868 | 27 | 2 | 6.349614 | 181.04  |
| 879 | 2018 | 0 | -7.82124 | 334.567 | 18 | 1 | 7.513873 | 250.932 |
| 880 | 2018 | 0 | -5.44999 | 360.827 | 25 | 2 | 7.2608   | 247.862 |
| 881 | 2018 | 0 | -7.81114 | 353.792 | 19 | 2 | 7.937767 | 285.335 |
| 882 | 2018 | 0 | -6.49495 | 310.095 | 24 | 1 | 6.916134 | 351.541 |
| 883 | 2018 | 1 | -5.90725 | 366.045 | 21 | 2 | 7.512705 | 252.161 |
| 884 | 2018 | 0 | -7.07599 | 282.616 | 29 | 2 | 6.611127 | 164.806 |
| 885 | 2019 | 1 | -3.76051 | 346.815 | 47 | 2 | 4.898393 | 504.376 |
| 886 | 2019 | 0 | -7.00074 | 299.039 | 36 | 0 | 6.096522 | 389.577 |
| 887 | 2019 | 1 | -4.09345 | 382.29  | 43 | 1 | 5.095937 | 500.127 |
| 888 | 2019 | 1 | -5.24159 | 310.989 | 43 | 0 | 5.287071 | 440.49  |
| 889 | 2019 | 0 | -4.40974 | 345.852 | 46 | 1 | 5.137047 | 529.694 |
| 890 | 2019 | 0 | -6.23996 | 269.162 | 35 | 0 | 6.072267 | 432.924 |
| 891 | 2019 | 1 | -3.69078 | 312.203 | 44 | 2 | 5.240152 | 492.006 |
| 892 | 2019 | 1 | -5.87555 | 315.59  | 40 | 0 | 5.694942 | 516.263 |
| 893 | 2019 | 1 | -3.4318  | 319.197 | 46 | 2 | 5.039764 | 515.073 |
| 894 | 2019 | 0 | -4.45918 | 334.315 | 37 | 2 | 5.523238 | 511.474 |
| 895 | 2019 | 1 | -5.6137  | 294.652 | 41 | 0 | 5.426873 | 543.489 |
| 896 | 2019 | 1 | -8.06668 | 248.124 | 28 | 0 | 5.879601 | 501.356 |
| 897 | 2019 | 1 | -5.31593 | 314.043 | 36 | 2 | 5.66843  | 508.904 |
| 898 | 2019 | 1 | -4.63667 | 327.979 | 38 | 2 | 5.431978 | 566.958 |
| 899 | 2019 | 1 | -5.15019 | 289.288 | 45 | 1 | 5.376062 | 499.956 |

Table S2 - Anonymized database

|     |      |   |          |         |    |   |          |         |
|-----|------|---|----------|---------|----|---|----------|---------|
| 900 | 2019 | 1 | -2.48211 | 400.639 | 51 | 2 | 4.783273 | 514.754 |
| 901 | 2019 | 1 | -5.45258 | 304.945 | 43 | 0 | 5.550265 | 480.654 |
| 902 | 2019 | 1 | -4.29449 | 321.305 | 42 | 1 | 5.220583 | 528.529 |
| 903 | 2019 | 1 | -4.05768 | 386.287 | 43 | 1 | 5.090078 | 505.107 |
| 904 | 2019 | 1 | -4.64643 | 311.157 | 39 | 1 | 5.043631 | 474.124 |
| 905 | 2019 | 0 | -5.47236 | 416.38  | 34 | 1 | 5.313608 | 622.153 |
| 906 | 2019 | 1 | -4.4804  | 331.583 | 42 | 1 | 5.148194 | 518.009 |
| 907 | 2019 | 1 | -3.3129  | 348.276 | 48 | 1 | 4.975174 | 484.098 |
| 908 | 2019 | 0 | -3.88729 | 336.306 | 46 | 1 | 4.835687 | 499.207 |
| 909 | 2019 | 1 | -4.47043 | 303.935 | 41 | 1 | 5.195107 | 513.713 |
| 910 | 2019 | 1 | -6.16152 | 322.998 | 38 | 0 | 5.854097 | 462.293 |
| 911 | 2019 | 1 | -4.46262 | 322.218 | 37 | 2 | 5.455272 | 601.429 |
| 912 | 2019 | 1 | -8.35988 | 217.186 | 26 | 0 | 6.415313 | 407.724 |
| 913 | 2019 | 0 | -3.9578  | 317.211 | 45 | 1 | 5.123914 | 480.404 |
| 914 | 2019 | 1 | -4.47043 | 303.935 | 41 | 1 | 5.195107 | 513.713 |
| 915 | 2019 | 0 | -3.93419 | 340.409 | 38 | 3 | 5.31214  | 548.711 |
| 916 | 2019 | 1 | -3.3129  | 348.276 | 48 | 1 | 4.975174 | 484.098 |
| 917 | 2019 | 1 | -5.6137  | 294.652 | 41 | 0 | 5.426873 | 543.489 |
| 918 | 2019 | 0 | -5.24159 | 310.989 | 43 | 0 | 5.287071 | 440.49  |
| 919 | 2019 | 1 | -4.75329 | 310.003 | 46 | 0 | 5.133521 | 487.816 |
| 920 | 2019 | 1 | -3.49504 | 313.277 | 46 | 2 | 4.914761 | 491.934 |
| 921 | 2019 | 0 | -4.20769 | 318.57  | 43 | 3 | 4.95145  | 488.611 |
| 922 | 2019 | 1 | -6.59369 | 250.609 | 36 | 0 | 5.62224  | 483.596 |
| 923 | 2019 | 0 | -3.75833 | 320.514 | 50 | 1 | 5.0674   | 485.061 |
| 924 | 2019 | 0 | -3.87159 | 318.522 | 48 | 1 | 5.018917 | 488.66  |
| 925 | 2019 | 0 | -5.11453 | 303.235 | 45 | 0 | 5.674451 | 462.749 |
| 926 | 2019 | 0 | -5.87555 | 315.59  | 40 | 0 | 5.694942 | 516.263 |
| 927 | 2019 | 1 | -2.68799 | 351.335 | 49 | 2 | 4.581138 | 596.635 |
| 928 | 2019 | 1 | -3.4318  | 319.197 | 46 | 2 | 5.039764 | 515.073 |
| 929 | 2019 | 0 | -7.65899 | 238.94  | 34 | 0 | 5.859651 | 518.333 |
| 930 | 2019 | 1 | -3.3129  | 348.276 | 48 | 1 | 4.975174 | 484.098 |
| 931 | 2019 | 0 | -5.87555 | 315.59  | 40 | 0 | 5.694942 | 516.263 |
| 932 | 2019 | 0 | -7.65899 | 238.94  | 34 | 0 | 5.859651 | 518.333 |
| 933 | 2019 | 1 | -3.3129  | 348.276 | 48 | 1 | 4.975174 | 484.098 |
| 934 | 2019 | 1 | -5.6137  | 294.652 | 41 | 0 | 5.426873 | 543.489 |
| 935 | 2019 | 1 | -5.84955 | 308.039 | 32 | 0 | 5.886017 | 561.172 |
| 936 | 2019 | 1 | -4.47043 | 303.935 | 41 | 1 | 5.195107 | 513.713 |
| 937 | 2019 | 1 | -7.65899 | 238.94  | 34 | 0 | 5.859651 | 518.333 |
| 938 | 2019 | 1 | -3.9578  | 317.211 | 45 | 1 | 5.123914 | 480.404 |
| 939 | 2019 | 1 | -6.05771 | 256.914 | 35 | 2 | 5.984195 | 423.871 |
| 940 | 2019 | 1 | -4.4831  | 330.103 | 38 | 2 | 5.392603 | 562.945 |
| 941 | 2019 | 1 | -5.19449 | 358.12  | 38 | 1 | 5.838659 | 552.653 |
| 942 | 2019 | 1 | -3.87159 | 318.522 | 48 | 1 | 5.018917 | 488.66  |
| 943 | 2019 | 0 | -5.45258 | 304.945 | 43 | 0 | 5.550265 | 480.654 |
| 944 | 2019 | 0 | -4.45918 | 334.315 | 37 | 2 | 5.523238 | 511.474 |
| 945 | 2019 | 1 | -5.6137  | 294.652 | 41 | 0 | 5.426873 | 543.489 |
| 946 | 2019 | 0 | -4.72295 | 327.698 | 44 | 1 | 5.411894 | 477.704 |
| 947 | 2019 | 1 | -3.3129  | 348.276 | 48 | 1 | 4.975174 | 484.098 |
| 948 | 2019 | 1 | -4.7944  | 356.626 | 44 | 1 | 5.006661 | 556.198 |
| 949 | 2019 | 1 | -3.3129  | 348.276 | 48 | 1 | 4.975174 | 484.098 |

Table S2 - Anonymized database

|     |      |   |          |         |    |   |          |         |
|-----|------|---|----------|---------|----|---|----------|---------|
| 950 | 2019 | 0 | -6.33396 | 266.799 | 37 | 1 | 6.01164  | 406.389 |
| 951 | 2019 | 0 | -5.45258 | 304.945 | 43 | 0 | 5.550265 | 480.654 |
| 952 | 2019 | 0 | -5.31593 | 314.043 | 36 | 2 | 5.66843  | 508.904 |
| 953 | 2019 | 1 | -5.24159 | 310.989 | 43 | 0 | 5.287071 | 440.49  |
| 954 | 2019 | 0 | -3.4318  | 319.197 | 46 | 2 | 5.039764 | 515.073 |
| 955 | 2019 | 0 | -6.43747 | 269.529 | 36 | 0 | 5.95026  | 447.542 |
| 956 | 2019 | 0 | -5.45258 | 304.945 | 43 | 0 | 5.550265 | 480.654 |
| 957 | 2019 | 0 | -5.94688 | 258.055 | 36 | 2 | 5.751378 | 388.757 |
| 958 | 2019 | 1 | -5.47236 | 416.38  | 34 | 1 | 5.313608 | 622.153 |
| 959 | 2019 | 1 | -7.33269 | 184.695 | 33 | 0 | 5.911776 | 469.051 |
| 960 | 2019 | 0 | -4.30589 | 344.709 | 43 | 2 | 5.10428  | 508.747 |
| 961 | 2019 | 0 | -4.45918 | 334.315 | 37 | 2 | 5.523238 | 511.474 |
| 962 | 2019 | 0 | -4.91638 | 309.095 | 41 | 2 | 5.392417 | 497.162 |
| 963 | 2019 | 1 | -5.94608 | 339.673 | 38 | 0 | 5.682072 | 507.493 |
| 964 | 2019 | 1 | -3.3129  | 348.276 | 48 | 1 | 4.975174 | 484.098 |
| 965 | 2019 | 1 | -7.00074 | 299.039 | 36 | 0 | 6.096522 | 389.577 |
| 966 | 2019 | 0 | -4.45918 | 334.315 | 37 | 2 | 5.523238 | 511.474 |
| 967 | 2019 | 1 | -3.93419 | 340.409 | 38 | 3 | 5.31214  | 548.711 |
| 968 | 2019 | 0 | -4.47043 | 303.935 | 41 | 1 | 5.195107 | 513.713 |
| 969 | 2019 | 1 | -4.7944  | 356.626 | 44 | 1 | 5.006661 | 556.198 |
| 970 | 2019 | 1 | -3.93111 | 324.98  | 44 | 2 | 5.178228 | 540.026 |
| 971 | 2019 | 1 | -3.51463 | 367.233 | 49 | 2 | 5.232931 | 532.969 |
| 972 | 2019 | 0 | -6.41129 | 269.816 | 36 | 0 | 5.565534 | 563.718 |
| 973 | 2019 | 1 | -4.7944  | 356.626 | 44 | 1 | 5.006661 | 556.198 |
| 974 | 2019 | 1 | -3.3129  | 348.276 | 48 | 1 | 4.975174 | 484.098 |
| 975 | 2019 | 1 | -4.33927 | 330.623 | 43 | 2 | 5.00001  | 502.706 |
| 976 | 2019 | 0 | -5.84955 | 308.039 | 32 | 0 | 5.886017 | 561.172 |
| 977 | 2019 | 1 | -3.3129  | 348.276 | 48 | 1 | 4.975174 | 484.098 |
| 978 | 2019 | 0 | -3.63914 | 334.62  | 46 | 2 | 4.63291  | 511.473 |
| 979 | 2019 | 1 | -4.47043 | 303.935 | 41 | 1 | 5.195107 | 513.713 |
| 980 | 2019 | 1 | -5.45258 | 304.945 | 43 | 0 | 5.550265 | 480.654 |
| 981 | 2019 | 1 | -3.49504 | 313.277 | 46 | 2 | 4.914761 | 491.934 |
| 982 | 2019 | 1 | -3.93419 | 340.409 | 38 | 3 | 5.31214  | 548.711 |
| 983 | 2019 | 0 | -4.45186 | 362.907 | 39 | 1 | 5.173466 | 572.828 |
| 984 | 2019 | 0 | -5.45258 | 304.945 | 43 | 0 | 5.550265 | 480.654 |
| 985 | 2019 | 1 | -2.90229 | 317.849 | 52 | 2 | 4.930131 | 537.539 |
| 986 | 2019 | 0 | -3.87159 | 318.522 | 48 | 1 | 5.018917 | 488.66  |
| 987 | 2019 | 1 | -5.45258 | 304.945 | 43 | 0 | 5.550265 | 480.654 |
| 988 | 2019 | 1 | -4.33927 | 330.623 | 43 | 2 | 5.00001  | 502.706 |
| 989 | 2019 | 1 | -6.16152 | 322.998 | 38 | 0 | 5.854097 | 462.293 |
| 990 | 2019 | 1 | -4.6838  | 319.487 | 38 | 2 | 5.346952 | 494.65  |
| 991 | 2019 | 0 | -3.50415 | 318.524 | 53 | 1 | 5.022956 | 490.892 |
| 992 | 2019 | 1 | -4.4804  | 331.583 | 42 | 1 | 5.148194 | 518.009 |
| 993 | 2019 | 1 | -5.45258 | 304.945 | 43 | 0 | 5.550265 | 480.654 |
| 994 | 2019 | 1 | -2.65456 | 369.101 | 50 | 2 | 4.613546 | 552.573 |
| 995 | 2019 | 1 | -6.05771 | 256.914 | 35 | 2 | 5.984195 | 423.871 |
| 996 | 2019 | 1 | -3.4318  | 319.197 | 46 | 2 | 5.039764 | 515.073 |
| 997 | 2019 | 1 | -4.55829 | 313.129 | 39 | 1 | 4.963728 | 501.908 |
| 998 | 2019 | 1 | -3.3129  | 348.276 | 48 | 1 | 4.975174 | 484.098 |
| 999 | 2019 | 1 | -4.33927 | 330.623 | 43 | 2 | 5.00001  | 502.706 |



Table S2 - Anonymized database

|      |      |   |          |         |    |   |          |         |
|------|------|---|----------|---------|----|---|----------|---------|
| 1000 | 2019 | 1 | -4.70182 | 292.193 | 38 | 2 | 5.359046 | 482.036 |
| 1001 | 2019 | 0 | -2.08757 | 381.085 | 50 | 3 | 4.534825 | 607.024 |
| 1002 | 2019 | 1 | -4.63667 | 327.979 | 38 | 2 | 5.431978 | 566.958 |
| 1003 | 2019 | 1 | -4.38503 | 341.272 | 44 | 1 | 5.119593 | 519.767 |
| 1004 | 2019 | 0 | -4.38503 | 341.272 | 44 | 1 | 5.119593 | 519.767 |
| 1005 | 2019 | 1 | -4.91638 | 309.095 | 41 | 2 | 5.392417 | 497.162 |
| 1006 | 2019 | 0 | -7.76235 | 277.011 | 30 | 0 | 6.483886 | 487.437 |
| 1007 | 2019 | 1 | -6.17124 | 287.268 | 41 | 0 | 5.625112 | 492.719 |
| 1008 | 2019 | 1 | -4.7944  | 356.626 | 44 | 1 | 5.006661 | 556.198 |
| 1009 | 2019 | 1 | -4.19045 | 320.987 | 41 | 2 | 5.221517 | 501.406 |
| 1010 | 2019 | 1 | -4.20769 | 318.57  | 43 | 3 | 4.95145  | 488.611 |
| 1011 | 2019 | 0 | -4.29449 | 321.305 | 42 | 1 | 5.220583 | 528.529 |
| 1012 | 2019 | 0 | -2.08757 | 381.085 | 50 | 3 | 4.534825 | 607.024 |
| 1013 | 2019 | 0 | -5.6137  | 294.652 | 41 | 0 | 5.426873 | 543.489 |
| 1014 | 2019 | 0 | -6.55951 | 299.438 | 36 | 0 | 6.000892 | 471.31  |
| 1015 | 2019 | 1 | -3.69078 | 312.203 | 44 | 2 | 5.240152 | 492.006 |
| 1016 | 2019 | 0 | -7.00074 | 299.039 | 36 | 0 | 6.096522 | 389.577 |
| 1017 | 2019 | 1 | -4.7944  | 356.626 | 44 | 1 | 5.006661 | 556.198 |
| 1018 | 2019 | 1 | -4.38503 | 341.272 | 44 | 1 | 5.119593 | 519.767 |
| 1019 | 2019 | 1 | -4.55829 | 313.129 | 39 | 1 | 4.963728 | 501.908 |
| 1020 | 2019 | 1 | -5.87555 | 315.59  | 40 | 0 | 5.694942 | 516.263 |
| 1021 | 2019 | 1 | -4.7944  | 356.626 | 44 | 1 | 5.006661 | 556.198 |
| 1022 | 2019 | 1 | -4.27204 | 308.602 | 41 | 2 | 5.232071 | 467.972 |
| 1023 | 2019 | 0 | -4.75329 | 310.003 | 46 | 0 | 5.133521 | 487.816 |
| 1024 | 2019 | 0 | -6.17492 | 336.916 | 38 | 0 | 5.527432 | 554.077 |
| 1025 | 2019 | 0 | -5.31593 | 314.043 | 36 | 2 | 5.66843  | 508.904 |
| 1026 | 2019 | 1 | -3.5203  | 317.732 | 49 | 1 | 4.986291 | 463.512 |
| 1027 | 2019 | 0 | -3.55612 | 376.155 | 48 | 2 | 5.019857 | 559.01  |
| 1028 | 2019 | 1 | -6.59369 | 250.609 | 36 | 0 | 5.62224  | 483.596 |
| 1029 | 2019 | 1 | -3.55705 | 304.823 | 47 | 2 | 5.08267  | 474.252 |
| 1030 | 2019 | 0 | -4.47043 | 303.935 | 41 | 1 | 5.195107 | 513.713 |
| 1031 | 2019 | 1 | -2.66879 | 342.33  | 50 | 2 | 4.614109 | 571.654 |
| 1032 | 2019 | 0 | -4.32788 | 320.592 | 41 | 4 | 4.962579 | 492.906 |
| 1033 | 2019 | 1 | -5.84955 | 308.039 | 32 | 0 | 5.886017 | 561.172 |
| 1034 | 2019 | 1 | -5.45258 | 304.945 | 43 | 0 | 5.550265 | 480.654 |
| 1035 | 2019 | 1 | -6.16152 | 322.998 | 38 | 0 | 5.854097 | 462.293 |
| 1036 | 2019 | 1 | -3.91564 | 347.476 | 38 | 3 | 5.476024 | 565.449 |
| 1037 | 2019 | 1 | -8.35988 | 217.186 | 26 | 0 | 6.415313 | 407.724 |
| 1038 | 2019 | 1 | -4.46262 | 322.218 | 37 | 2 | 5.455272 | 601.429 |
| 1039 | 2019 | 0 | -2.68799 | 351.335 | 49 | 2 | 4.581138 | 596.635 |
| 1040 | 2019 | 1 | -3.93111 | 324.98  | 44 | 2 | 5.178228 | 540.026 |
| 1041 | 2019 | 0 | -4.41025 | 366.521 | 40 | 1 | 4.98413  | 567.192 |
| 1042 | 2019 | 0 | -4.45918 | 334.315 | 37 | 2 | 5.523238 | 511.474 |
| 1043 | 2019 | 1 | -4.05768 | 386.287 | 43 | 1 | 5.090078 | 505.107 |
| 1044 | 2019 | 1 | -5.59907 | 348.703 | 37 | 0 | 5.467555 | 576.059 |
| 1045 | 2019 | 0 | -7.33269 | 184.695 | 33 | 0 | 5.911776 | 469.051 |
| 1046 | 2019 | 1 | -4.4831  | 330.103 | 38 | 2 | 5.392603 | 562.945 |
| 1047 | 2019 | 0 | -4.061   | 330.015 | 41 | 2 | 5.321926 | 523.361 |
| 1048 | 2019 | 1 | -4.05768 | 386.287 | 43 | 1 | 5.090078 | 505.107 |
| 1049 | 2019 | 0 | -8.35988 | 217.186 | 26 | 0 | 6.415313 | 407.724 |

Table S2 - Anonymized database

|      |      |   |          |         |    |   |          |         |
|------|------|---|----------|---------|----|---|----------|---------|
| 1050 | 2019 | 1 | -3.91564 | 347.476 | 38 | 3 | 5.476024 | 565.449 |
| 1051 | 2019 | 1 | -6.09832 | 362.381 | 32 | 0 | 6.020559 | 542.213 |
| 1052 | 2019 | 0 | -7.65899 | 238.94  | 34 | 0 | 5.859651 | 518.333 |
| 1053 | 2019 | 1 | -4.41025 | 366.521 | 40 | 1 | 4.98413  | 567.192 |
| 1054 | 2019 | 0 | -5.40087 | 309.561 | 36 | 0 | 5.442493 | 484.634 |
| 1055 | 2019 | 1 | -4.7944  | 356.626 | 44 | 1 | 5.006661 | 556.198 |
| 1056 | 2019 | 0 | -7.65899 | 238.94  | 34 | 0 | 5.859651 | 518.333 |
| 1057 | 2019 | 1 | -3.95811 | 331.068 | 42 | 2 | 5.278865 | 566.068 |
| 1058 | 2019 | 1 | -4.4831  | 330.103 | 38 | 2 | 5.392603 | 562.945 |
| 1059 | 2019 | 0 | -7.65899 | 238.94  | 34 | 0 | 5.859651 | 518.333 |
| 1060 | 2019 | 1 | -3.93111 | 324.98  | 44 | 2 | 5.178228 | 540.026 |
| 1061 | 2019 | 1 | -5.45258 | 304.945 | 43 | 0 | 5.550265 | 480.654 |
| 1062 | 2019 | 1 | -4.4804  | 331.583 | 42 | 1 | 5.148194 | 518.009 |
| 1063 | 2019 | 0 | -3.96623 | 304.299 | 52 | 1 | 5.140466 | 459.523 |
| 1064 | 2019 | 0 | -7.00074 | 299.039 | 36 | 0 | 6.096522 | 389.577 |
| 1065 | 2019 | 1 | -3.3129  | 348.276 | 48 | 1 | 4.975174 | 484.098 |
| 1066 | 2019 | 0 | -6.59369 | 250.609 | 36 | 0 | 5.62224  | 483.596 |
| 1067 | 2019 | 1 | -4.45186 | 362.907 | 39 | 1 | 5.173466 | 572.828 |
| 1068 | 2019 | 1 | -6.59369 | 250.609 | 36 | 0 | 5.62224  | 483.596 |
| 1069 | 2019 | 0 | -3.49504 | 313.277 | 46 | 2 | 4.914761 | 491.934 |
| 1070 | 2019 | 0 | -4.061   | 330.015 | 41 | 2 | 5.321926 | 523.361 |
| 1071 | 2019 | 1 | -3.49504 | 313.277 | 46 | 2 | 4.914761 | 491.934 |
| 1072 | 2019 | 1 | -3.34624 | 318.067 | 53 | 2 | 4.98291  | 495.029 |
| 1073 | 2019 | 0 | -7.82548 | 322.886 | 28 | 0 | 5.510701 | 528.394 |
| 1074 | 2019 | 0 | -4.66312 | 326.279 | 38 | 2 | 5.426116 | 570.167 |
| 1075 | 2019 | 0 | -7.00074 | 299.039 | 36 | 0 | 6.096522 | 389.577 |
| 1076 | 2019 | 1 | -4.96542 | 383.416 | 38 | 1 | 5.073697 | 526.242 |
| 1077 | 2019 | 1 | -3.3129  | 348.276 | 48 | 1 | 4.975174 | 484.098 |
| 1078 | 2019 | 1 | -4.46704 | 342.849 | 36 | 2 | 5.522096 | 511.449 |
| 1079 | 2019 | 0 | -6.23996 | 269.162 | 35 | 0 | 6.072267 | 432.924 |
| 1080 | 2019 | 1 | -3.50415 | 318.524 | 53 | 1 | 5.022956 | 490.892 |
| 1081 | 2019 | 0 | -7.33269 | 184.695 | 33 | 0 | 5.911776 | 469.051 |
| 1082 | 2019 | 1 | -2.32977 | 366.025 | 50 | 2 | 4.555181 | 616.989 |
| 1083 | 2019 | 0 | -3.18124 | 322     | 53 | 1 | 4.868373 | 472.559 |
| 1084 | 2019 | 0 | -6.33396 | 266.799 | 37 | 1 | 6.01164  | 406.389 |
| 1085 | 2019 | 0 | -5.31593 | 314.043 | 36 | 2 | 5.66843  | 508.904 |
| 1086 | 2019 | 1 | -4.23208 | 365.71  | 43 | 1 | 5.194001 | 519.539 |
| 1087 | 2019 | 0 | -7.00074 | 299.039 | 36 | 0 | 6.096522 | 389.577 |
| 1088 | 2019 | 1 | -5.47236 | 416.38  | 34 | 1 | 5.313608 | 622.153 |
| 1089 | 2019 | 1 | -5.45258 | 304.945 | 43 | 0 | 5.550265 | 480.654 |
| 1090 | 2019 | 0 | -7.76235 | 277.011 | 30 | 0 | 6.483886 | 487.437 |
| 1091 | 2019 | 1 | -3.5203  | 317.732 | 49 | 1 | 4.986291 | 463.512 |
| 1092 | 2019 | 0 | -4.32788 | 320.592 | 41 | 4 | 4.962579 | 492.906 |
| 1093 | 2019 | 1 | -3.4318  | 319.197 | 46 | 2 | 5.039764 | 515.073 |
| 1094 | 2019 | 1 | -4.6838  | 319.487 | 38 | 2 | 5.346952 | 494.65  |
| 1095 | 2019 | 1 | -3.93111 | 324.98  | 44 | 2 | 5.178228 | 540.026 |
| 1096 | 2019 | 0 | -7.33269 | 184.695 | 33 | 0 | 5.911776 | 469.051 |
| 1097 | 2019 | 0 | -7.82548 | 322.886 | 28 | 0 | 5.510701 | 528.394 |
| 1098 | 2019 | 1 | -4.53618 | 313.966 | 39 | 2 | 5.291598 | 478.142 |
| 1099 | 2019 | 1 | -4.75329 | 310.003 | 46 | 0 | 5.133521 | 487.816 |

Table S2 - Anonymized database

|      |      |   |          |         |    |   |          |         |
|------|------|---|----------|---------|----|---|----------|---------|
| 1100 | 2019 | 1 | -5.31593 | 314.043 | 36 | 2 | 5.66843  | 508.904 |
| 1101 | 2019 | 1 | -4.48699 | 335.255 | 43 | 2 | 5.329501 | 560.741 |
| 1102 | 2019 | 0 | -3.12136 | 335.365 | 49 | 1 | 4.576384 | 540.209 |
| 1103 | 2019 | 1 | -4.07084 | 313.487 | 45 | 1 | 5.190497 | 514.185 |
| 1104 | 2019 | 1 | -4.05765 | 338.255 | 40 | 1 | 5.013981 | 520.512 |
| 1105 | 2019 | 1 | -4.33927 | 330.623 | 43 | 2 | 5.00001  | 502.706 |
| 1106 | 2019 | 1 | -3.49504 | 313.277 | 46 | 2 | 4.914761 | 491.934 |
| 1107 | 2019 | 0 | -6.33396 | 266.799 | 37 | 1 | 6.01164  | 406.389 |
| 1108 | 2019 | 1 | -4.27204 | 308.602 | 41 | 2 | 5.232071 | 467.972 |
| 1109 | 2019 | 1 | -3.66295 | 333.767 | 45 | 2 | 4.952486 | 513.223 |
| 1110 | 2019 | 1 | -3.86198 | 325.153 | 44 | 1 | 4.846032 | 504.883 |
| 1111 | 2019 | 1 | -5.5641  | 310.64  | 43 | 0 | 5.404042 | 506.256 |
| 1112 | 2019 | 0 | -7.82548 | 322.886 | 28 | 0 | 5.510701 | 528.394 |
| 1113 | 2019 | 1 | -3.4318  | 319.197 | 46 | 2 | 5.039764 | 515.073 |
| 1114 | 2019 | 1 | -3.34624 | 318.067 | 53 | 2 | 4.98291  | 495.029 |
| 1115 | 2019 | 1 | -4.70182 | 292.193 | 38 | 2 | 5.359046 | 482.036 |
| 1116 | 2019 | 0 | -7.00074 | 299.039 | 36 | 0 | 6.096522 | 389.577 |
| 1117 | 2019 | 1 | -4.19045 | 320.987 | 41 | 2 | 5.221517 | 501.406 |
| 1118 | 2019 | 0 | -3.32877 | 405.774 | 47 | 2 | 5.007678 | 505.575 |
| 1119 | 2019 | 1 | -8.35988 | 217.186 | 26 | 0 | 6.415313 | 407.724 |
| 1120 | 2019 | 0 | -3.88729 | 336.306 | 46 | 1 | 4.835687 | 499.207 |
| 1121 | 2019 | 1 | -4.45186 | 362.907 | 39 | 1 | 5.173466 | 572.828 |
| 1122 | 2019 | 1 | -4.55829 | 313.129 | 39 | 1 | 4.963728 | 501.908 |
| 1123 | 2019 | 1 | -3.9488  | 354.511 | 46 | 1 | 5.098173 | 568.326 |
| 1124 | 2019 | 1 | -4.2633  | 325.812 | 40 | 2 | 5.236413 | 489.847 |
| 1125 | 2019 | 1 | -5.45258 | 304.945 | 43 | 0 | 5.550265 | 480.654 |
| 1126 | 2019 | 1 | -6.38046 | 262.27  | 36 | 0 | 5.918594 | 437.236 |
| 1127 | 2019 | 0 | -3.93419 | 340.409 | 38 | 3 | 5.31214  | 548.711 |
| 1128 | 2019 | 0 | -4.91638 | 309.095 | 41 | 2 | 5.392417 | 497.162 |
| 1129 | 2019 | 0 | -4.45918 | 334.315 | 37 | 2 | 5.523238 | 511.474 |
| 1130 | 2019 | 1 | -4.38503 | 341.272 | 44 | 1 | 5.119593 | 519.767 |
| 1131 | 2019 | 0 | -3.96623 | 304.299 | 52 | 1 | 5.140466 | 459.523 |
| 1132 | 2019 | 1 | -5.31593 | 314.043 | 36 | 2 | 5.66843  | 508.904 |
| 1133 | 2019 | 0 | -5.59907 | 348.703 | 37 | 0 | 5.467555 | 576.059 |
| 1134 | 2019 | 1 | -4.45186 | 362.907 | 39 | 1 | 5.173466 | 572.828 |
| 1135 | 2019 | 1 | -4.23208 | 365.71  | 43 | 1 | 5.194001 | 519.539 |
| 1136 | 2019 | 0 | -7.76235 | 277.011 | 30 | 0 | 6.483886 | 487.437 |
| 1137 | 2019 | 1 | -5.45258 | 304.945 | 43 | 0 | 5.550265 | 480.654 |
| 1138 | 2019 | 1 | -4.23208 | 365.71  | 43 | 1 | 5.194001 | 519.539 |
| 1139 | 2019 | 1 | -7.82548 | 322.886 | 28 | 0 | 5.510701 | 528.394 |
| 1140 | 2019 | 1 | -8.35988 | 217.186 | 26 | 0 | 6.415313 | 407.724 |
| 1141 | 2019 | 1 | -4.55829 | 313.129 | 39 | 1 | 4.963728 | 501.908 |
| 1142 | 2019 | 1 | -4.05768 | 386.287 | 43 | 1 | 5.090078 | 505.107 |
| 1143 | 2019 | 1 | -3.95811 | 331.068 | 42 | 2 | 5.278865 | 566.068 |
| 1144 | 2019 | 1 | -3.5203  | 317.732 | 49 | 1 | 4.986291 | 463.512 |
| 1145 | 2019 | 1 | -3.55705 | 304.823 | 47 | 2 | 5.08267  | 474.252 |
| 1146 | 2019 | 1 | -3.51463 | 367.233 | 49 | 2 | 5.232931 | 532.969 |
| 1147 | 2019 | 0 | -4.79401 | 322.572 | 45 | 1 | 5.279937 | 571.487 |
| 1148 | 2019 | 1 | -8.35988 | 217.186 | 26 | 0 | 6.415313 | 407.724 |
| 1149 | 2019 | 0 | -3.4318  | 319.197 | 46 | 2 | 5.039764 | 515.073 |

Table S2 - Anonymized database

|      |      |   |          |         |    |   |          |         |
|------|------|---|----------|---------|----|---|----------|---------|
| 1150 | 2019 | 0 | -4.55829 | 313.129 | 39 | 1 | 4.963728 | 501.908 |
| 1151 | 2019 | 0 | -6.36062 | 318.007 | 40 | 0 | 5.700947 | 458.444 |
| 1152 | 2019 | 1 | -6.41129 | 269.816 | 36 | 0 | 5.565534 | 563.718 |
| 1153 | 2019 | 0 | -7.33269 | 184.695 | 33 | 0 | 5.911776 | 469.051 |
| 1154 | 2019 | 0 | -3.69199 | 329.98  | 44 | 2 | 4.822085 | 483.68  |
| 1155 | 2019 | 1 | -3.3129  | 348.276 | 48 | 1 | 4.975174 | 484.098 |
| 1156 | 2019 | 1 | -4.7944  | 356.626 | 44 | 1 | 5.006661 | 556.198 |
| 1157 | 2019 | 1 | -3.3129  | 348.276 | 48 | 1 | 4.975174 | 484.098 |
| 1158 | 2019 | 1 | -3.55612 | 376.155 | 48 | 2 | 5.019857 | 559.01  |
| 1159 | 2019 | 1 | -6.5841  | 298.407 | 37 | 0 | 5.971897 | 382.27  |
| 1160 | 2019 | 1 | -4.33927 | 330.623 | 43 | 2 | 5.00001  | 502.706 |
| 1161 | 2019 | 1 | -3.96623 | 304.299 | 52 | 1 | 5.140466 | 459.523 |
| 1162 | 2019 | 1 | -3.69199 | 329.98  | 44 | 2 | 4.822085 | 483.68  |
| 1163 | 2019 | 1 | -3.93419 | 340.409 | 38 | 3 | 5.31214  | 548.711 |
| 1164 | 2019 | 1 | -3.4318  | 319.197 | 46 | 2 | 5.039764 | 515.073 |
| 1165 | 2019 | 0 | -7.00074 | 299.039 | 36 | 0 | 6.096522 | 389.577 |
| 1166 | 2019 | 1 | -4.7944  | 356.626 | 44 | 1 | 5.006661 | 556.198 |
| 1167 | 2019 | 1 | -5.45258 | 304.945 | 43 | 0 | 5.550265 | 480.654 |
| 1168 | 2019 | 1 | -6.17124 | 287.268 | 41 | 0 | 5.625112 | 492.719 |
| 1169 | 2019 | 1 | -4.45186 | 362.907 | 39 | 1 | 5.173466 | 572.828 |
| 1170 | 2019 | 1 | -4.27204 | 308.602 | 41 | 2 | 5.232071 | 467.972 |
| 1171 | 2019 | 1 | -4.55829 | 313.129 | 39 | 1 | 4.963728 | 501.908 |
| 1172 | 2019 | 1 | -4.55829 | 313.129 | 39 | 1 | 4.963728 | 501.908 |
| 1173 | 2019 | 1 | -4.55829 | 313.129 | 39 | 1 | 4.963728 | 501.908 |
| 1174 | 2019 | 1 | -3.93419 | 340.409 | 38 | 3 | 5.31214  | 548.711 |
| 1175 | 2019 | 0 | -6.13421 | 286.197 | 41 | 0 | 5.574049 | 513.422 |
| 1176 | 2019 | 1 | -2.90229 | 317.849 | 52 | 2 | 4.930131 | 537.539 |
| 1177 | 2019 | 0 | -4.29449 | 321.305 | 42 | 1 | 5.220583 | 528.529 |
| 1178 | 2019 | 0 | -2.68799 | 351.335 | 49 | 2 | 4.581138 | 596.635 |
| 1179 | 2019 | 1 | -5.45258 | 304.945 | 43 | 0 | 5.550265 | 480.654 |
| 1180 | 2019 | 1 | -4.33927 | 330.623 | 43 | 2 | 5.00001  | 502.706 |
| 1181 | 2019 | 1 | -3.87159 | 318.522 | 48 | 1 | 5.018917 | 488.66  |
| 1182 | 2019 | 1 | -3.55612 | 376.155 | 48 | 2 | 5.019857 | 559.01  |
| 1183 | 2019 | 0 | -5.24159 | 310.989 | 43 | 0 | 5.287071 | 440.49  |
| 1184 | 2019 | 0 | -7.82548 | 322.886 | 28 | 0 | 5.510701 | 528.394 |
| 1185 | 2019 | 1 | -3.3129  | 348.276 | 48 | 1 | 4.975174 | 484.098 |
| 1186 | 2019 | 0 | -5.24159 | 310.989 | 43 | 0 | 5.287071 | 440.49  |
| 1187 | 2019 | 1 | -2.81745 | 342.717 | 51 | 2 | 4.929575 | 574.121 |
| 1188 | 2019 | 1 | -3.69078 | 312.203 | 44 | 2 | 5.240152 | 492.006 |
| 1189 | 2019 | 1 | -6.9887  | 274.518 | 39 | 0 | 6.269623 | 498.654 |
| 1190 | 2019 | 1 | -3.55612 | 376.155 | 48 | 2 | 5.019857 | 559.01  |
| 1191 | 2019 | 1 | -3.3129  | 348.276 | 48 | 1 | 4.975174 | 484.098 |
| 1192 | 2019 | 1 | -4.27204 | 308.602 | 41 | 2 | 5.232071 | 467.972 |
| 1193 | 2019 | 0 | -8.35988 | 217.186 | 26 | 0 | 6.415313 | 407.724 |
| 1194 | 2019 | 1 | -3.75855 | 321.524 | 48 | 1 | 5.03645  | 476.372 |
| 1195 | 2019 | 1 | -5.24159 | 310.989 | 43 | 0 | 5.287071 | 440.49  |
| 1196 | 2019 | 1 | -5.6137  | 294.652 | 41 | 0 | 5.426873 | 543.489 |
| 1197 | 2019 | 1 | -5.19449 | 358.12  | 38 | 1 | 5.838659 | 552.653 |
| 1198 | 2019 | 0 | -3.9578  | 317.211 | 45 | 1 | 5.123914 | 480.404 |
| 1199 | 2019 | 0 | -3.96623 | 304.299 | 52 | 1 | 5.140466 | 459.523 |

Table S2 - Anonymized database

|      |      |   |          |         |    |   |          |         |
|------|------|---|----------|---------|----|---|----------|---------|
| 1200 | 2019 | 1 | -4.45186 | 362.907 | 39 | 1 | 5.173466 | 572.828 |
| 1201 | 2019 | 1 | -4.19045 | 320.987 | 41 | 2 | 5.221517 | 501.406 |
| 1202 | 2019 | 1 | -3.5203  | 317.732 | 49 | 1 | 4.986291 | 463.512 |
| 1203 | 2019 | 0 | -7.82548 | 322.886 | 28 | 0 | 5.510701 | 528.394 |
| 1204 | 2019 | 1 | -3.51463 | 367.233 | 49 | 2 | 5.232931 | 532.969 |
| 1205 | 2019 | 0 | -3.6911  | 330.824 | 47 | 1 | 4.999539 | 589.911 |
| 1206 | 2019 | 1 | -3.88729 | 336.306 | 46 | 1 | 4.835687 | 499.207 |
| 1207 | 2019 | 1 | -5.87555 | 315.59  | 40 | 0 | 5.694942 | 516.263 |
| 1208 | 2019 | 1 | -4.17502 | 356.028 | 45 | 2 | 5.06267  | 509.974 |
| 1209 | 2019 | 1 | -4.14487 | 326.941 | 42 | 2 | 5.308244 | 534.958 |
| 1210 | 2019 | 0 | -4.45186 | 362.907 | 39 | 1 | 5.173466 | 572.828 |
| 1211 | 2019 | 1 | -2.90229 | 317.849 | 52 | 2 | 4.930131 | 537.539 |
| 1212 | 2019 | 1 | -3.15825 | 340.806 | 49 | 3 | 4.469025 | 498.859 |
| 1213 | 2019 | 1 | -3.3129  | 348.276 | 48 | 1 | 4.975174 | 484.098 |
| 1214 | 2019 | 1 | -5.45258 | 304.945 | 43 | 0 | 5.550265 | 480.654 |
| 1215 | 2019 | 1 | -3.28244 | 324.213 | 43 | 2 | 4.698999 | 534.732 |
| 1216 | 2019 | 1 | -5.09752 | 312.814 | 41 | 0 | 5.247892 | 460.052 |
| 1217 | 2019 | 1 | -3.50415 | 318.524 | 53 | 1 | 5.022956 | 490.892 |
| 1218 | 2019 | 1 | -4.07084 | 313.487 | 45 | 1 | 5.190497 | 514.185 |
| 1219 | 2019 | 0 | -5.6137  | 294.652 | 41 | 0 | 5.426873 | 543.489 |
| 1220 | 2019 | 1 | -3.15825 | 340.806 | 49 | 3 | 4.469025 | 498.859 |
| 1221 | 2019 | 0 | -7.00074 | 299.039 | 36 | 0 | 6.096522 | 389.577 |
| 1222 | 2019 | 0 | -5.31249 | 332.657 | 37 | 1 | 5.727701 | 529.991 |
| 1223 | 2019 | 1 | -4.09345 | 382.29  | 43 | 1 | 5.095937 | 500.127 |
| 1224 | 2019 | 1 | -5.45258 | 304.945 | 43 | 0 | 5.550265 | 480.654 |
| 1225 | 2019 | 1 | -3.93111 | 324.98  | 44 | 2 | 5.178228 | 540.026 |
| 1226 | 2019 | 1 | -6.17492 | 336.916 | 38 | 0 | 5.527432 | 554.077 |
| 1227 | 2019 | 1 | -6.09832 | 362.381 | 32 | 0 | 6.020559 | 542.213 |
| 1228 | 2019 | 1 | -4.46704 | 342.849 | 36 | 2 | 5.522096 | 511.449 |
| 1229 | 2019 | 1 | -3.69078 | 312.203 | 44 | 2 | 5.240152 | 492.006 |
| 1230 | 2019 | 0 | -4.7944  | 356.626 | 44 | 1 | 5.006661 | 556.198 |
| 1231 | 2019 | 1 | -4.45186 | 362.907 | 39 | 1 | 5.173466 | 572.828 |
| 1232 | 2019 | 0 | -3.75833 | 320.514 | 50 | 1 | 5.0674   | 485.061 |
| 1233 | 2019 | 0 | -2.67178 | 364.946 | 50 | 2 | 4.603849 | 583.92  |
| 1234 | 2019 | 0 | -4.7944  | 356.626 | 44 | 1 | 5.006661 | 556.198 |
| 1235 | 2019 | 1 | -5.31249 | 332.657 | 37 | 1 | 5.727701 | 529.991 |
| 1236 | 2019 | 1 | -3.96623 | 304.299 | 52 | 1 | 5.140466 | 459.523 |
| 1237 | 2019 | 1 | -3.66295 | 333.767 | 45 | 2 | 4.952486 | 513.223 |
| 1238 | 2019 | 0 | -3.12136 | 335.365 | 49 | 1 | 4.576384 | 540.209 |
| 1239 | 2019 | 1 | -4.45186 | 362.907 | 39 | 1 | 5.173466 | 572.828 |
| 1240 | 2019 | 1 | -3.3129  | 348.276 | 48 | 1 | 4.975174 | 484.098 |
| 1241 | 2019 | 1 | -4.4804  | 331.583 | 42 | 1 | 5.148194 | 518.009 |
| 1242 | 2019 | 1 | -5.45258 | 304.945 | 43 | 0 | 5.550265 | 480.654 |
| 1243 | 2019 | 1 | -6.13421 | 286.197 | 41 | 0 | 5.574049 | 513.422 |
| 1244 | 2019 | 0 | -8.35988 | 217.186 | 26 | 0 | 6.415313 | 407.724 |
| 1245 | 2019 | 1 | -4.05768 | 386.287 | 43 | 1 | 5.090078 | 505.107 |
| 1246 | 2019 | 1 | -4.4831  | 330.103 | 38 | 2 | 5.392603 | 562.945 |
| 1247 | 2019 | 1 | -6.17124 | 287.268 | 41 | 0 | 5.625112 | 492.719 |
| 1248 | 2019 | 1 | -3.91564 | 347.476 | 38 | 3 | 5.476024 | 565.449 |
| 1249 | 2019 | 1 | -4.061   | 330.015 | 41 | 2 | 5.321926 | 523.361 |

Table S2 - Anonymized database

|      |      |   |          |         |    |   |          |         |
|------|------|---|----------|---------|----|---|----------|---------|
| 1250 | 2019 | 1 | -5.45258 | 304.945 | 43 | 0 | 5.550265 | 480.654 |
| 1251 | 2019 | 0 | -2.62644 | 335.621 | 49 | 3 | 4.628169 | 565.458 |
| 1252 | 2019 | 1 | -3.55612 | 376.155 | 48 | 2 | 5.019857 | 559.01  |
| 1253 | 2019 | 0 | -3.75833 | 320.514 | 50 | 1 | 5.0674   | 485.061 |
| 1254 | 2019 | 1 | -5.84955 | 308.039 | 32 | 0 | 5.886017 | 561.172 |
| 1255 | 2019 | 1 | -2.90229 | 317.849 | 52 | 2 | 4.930131 | 537.539 |
| 1256 | 2019 | 1 | -3.3129  | 348.276 | 48 | 1 | 4.975174 | 484.098 |
| 1257 | 2019 | 1 | -6.24288 | 391.685 | 38 | 0 | 5.22349  | 575.969 |
| 1258 | 2019 | 1 | -3.3129  | 348.276 | 48 | 1 | 4.975174 | 484.098 |
| 1259 | 2019 | 1 | -4.45918 | 334.315 | 37 | 2 | 5.523238 | 511.474 |
| 1260 | 2019 | 1 | -5.40563 | 339     | 38 | 1 | 5.13232  | 519.911 |
| 1261 | 2019 | 0 | -4.40974 | 345.852 | 46 | 1 | 5.137047 | 529.694 |
| 1262 | 2019 | 1 | -5.15019 | 289.288 | 45 | 1 | 5.376062 | 499.956 |
| 1263 | 2019 | 1 | -6.05771 | 256.914 | 35 | 2 | 5.984195 | 423.871 |
| 1264 | 2019 | 0 | -4.7944  | 356.626 | 44 | 1 | 5.006661 | 556.198 |
| 1265 | 2019 | 1 | -6.59369 | 250.609 | 36 | 0 | 5.62224  | 483.596 |
| 1266 | 2019 | 1 | -3.87159 | 318.522 | 48 | 1 | 5.018917 | 488.66  |
| 1267 | 2019 | 0 | -5.94688 | 258.055 | 36 | 2 | 5.751378 | 388.757 |
| 1268 | 2019 | 0 | -5.59907 | 348.703 | 37 | 0 | 5.467555 | 576.059 |
| 1269 | 2019 | 1 | -2.90229 | 317.849 | 52 | 2 | 4.930131 | 537.539 |
| 1270 | 2019 | 1 | -3.49504 | 313.277 | 46 | 2 | 4.914761 | 491.934 |
| 1271 | 2019 | 1 | -3.3129  | 348.276 | 48 | 1 | 4.975174 | 484.098 |
| 1272 | 2019 | 1 | -3.87159 | 318.522 | 48 | 1 | 5.018917 | 488.66  |
| 1273 | 2019 | 1 | -3.4318  | 319.197 | 46 | 2 | 5.039764 | 515.073 |
| 1274 | 2019 | 0 | -3.76051 | 346.815 | 47 | 2 | 4.898393 | 504.376 |
| 1275 | 2019 | 0 | -7.33269 | 184.695 | 33 | 0 | 5.911776 | 469.051 |
| 1276 | 2019 | 1 | -4.55829 | 313.129 | 39 | 1 | 4.963728 | 501.908 |
| 1277 | 2019 | 0 | -5.5641  | 310.64  | 43 | 0 | 5.404042 | 506.256 |
| 1278 | 2019 | 1 | -5.24159 | 310.989 | 43 | 0 | 5.287071 | 440.49  |
| 1279 | 2019 | 1 | -3.86198 | 325.153 | 44 | 1 | 4.846032 | 504.883 |
| 1280 | 2019 | 1 | -6.9887  | 274.518 | 39 | 0 | 6.269623 | 498.654 |
| 1281 | 2019 | 0 | -4.38503 | 341.272 | 44 | 1 | 5.119593 | 519.767 |
| 1282 | 2019 | 1 | -4.07084 | 313.487 | 45 | 1 | 5.190497 | 514.185 |
| 1283 | 2019 | 0 | -6.43747 | 269.529 | 36 | 0 | 5.95026  | 447.542 |
| 1284 | 2019 | 1 | -4.91638 | 309.095 | 41 | 2 | 5.392417 | 497.162 |
| 1285 | 2019 | 1 | -8.35988 | 217.186 | 26 | 0 | 6.415313 | 407.724 |
| 1286 | 2019 | 0 | -3.75833 | 320.514 | 50 | 1 | 5.0674   | 485.061 |
| 1287 | 2019 | 1 | -6.09832 | 362.381 | 32 | 0 | 6.020559 | 542.213 |
| 1288 | 2019 | 0 | -7.00074 | 299.039 | 36 | 0 | 6.096522 | 389.577 |
| 1289 | 2019 | 1 | -5.59907 | 348.703 | 37 | 0 | 5.467555 | 576.059 |
| 1290 | 2019 | 0 | -6.5841  | 298.407 | 37 | 0 | 5.971897 | 382.27  |
| 1291 | 2019 | 1 | -3.69078 | 312.203 | 44 | 2 | 5.240152 | 492.006 |
| 1292 | 2019 | 1 | -4.46704 | 342.849 | 36 | 2 | 5.522096 | 511.449 |
| 1293 | 2019 | 1 | -6.17124 | 287.268 | 41 | 0 | 5.625112 | 492.719 |
| 1294 | 2019 | 0 | -4.45918 | 334.315 | 37 | 2 | 5.523238 | 511.474 |
| 1295 | 2019 | 1 | -5.45258 | 304.945 | 43 | 0 | 5.550265 | 480.654 |
| 1296 | 2019 | 0 | -4.41796 | 375.687 | 39 | 1 | 5.141097 | 548.239 |
| 1297 | 2019 | 1 | -5.45258 | 304.945 | 43 | 0 | 5.550265 | 480.654 |
| 1298 | 2019 | 1 | -4.55829 | 313.129 | 39 | 1 | 4.963728 | 501.908 |
| 1299 | 2019 | 0 | -8.35988 | 217.186 | 26 | 0 | 6.415313 | 407.724 |

Table S2 - Anonymized database

|      |      |   |          |         |    |   |          |         |
|------|------|---|----------|---------|----|---|----------|---------|
| 1300 | 2019 | 1 | -2.90229 | 317.849 | 52 | 2 | 4.930131 | 537.539 |
| 1301 | 2019 | 0 | -5.6137  | 294.652 | 41 | 0 | 5.426873 | 543.489 |
| 1302 | 2019 | 0 | -4.91638 | 309.095 | 41 | 2 | 5.392417 | 497.162 |
| 1303 | 2019 | 1 | -3.93111 | 324.98  | 44 | 2 | 5.178228 | 540.026 |
| 1304 | 2019 | 0 | -6.16152 | 322.998 | 38 | 0 | 5.854097 | 462.293 |
| 1305 | 2019 | 0 | -5.45258 | 304.945 | 43 | 0 | 5.550265 | 480.654 |
| 1306 | 2019 | 0 | -4.33927 | 330.623 | 43 | 2 | 5.00001  | 502.706 |
| 1307 | 2019 | 0 | -3.87159 | 318.522 | 48 | 1 | 5.018917 | 488.66  |
| 1308 | 2019 | 1 | -3.23505 | 292.894 | 50 | 2 | 5.061666 | 468.763 |
| 1309 | 2019 | 1 | -4.30589 | 344.709 | 43 | 2 | 5.10428  | 508.747 |
| 1310 | 2019 | 0 | -7.00074 | 299.039 | 36 | 0 | 6.096522 | 389.577 |
| 1311 | 2019 | 0 | -7.00074 | 299.039 | 36 | 0 | 6.096522 | 389.577 |
| 1312 | 2019 | 1 | -5.94608 | 339.673 | 38 | 0 | 5.682072 | 507.493 |
| 1313 | 2019 | 1 | -5.45258 | 304.945 | 43 | 0 | 5.550265 | 480.654 |
| 1314 | 2019 | 1 | -5.6137  | 294.652 | 41 | 0 | 5.426873 | 543.489 |
| 1315 | 2019 | 0 | -6.23256 | 263.12  | 35 | 1 | 5.8627   | 383.889 |
| 1316 | 2019 | 1 | -3.69078 | 312.203 | 44 | 2 | 5.240152 | 492.006 |
| 1317 | 2019 | 1 | -5.31593 | 314.043 | 36 | 2 | 5.66843  | 508.904 |
| 1318 | 2019 | 0 | -7.00074 | 299.039 | 36 | 0 | 6.096522 | 389.577 |
| 1319 | 2019 | 1 | -8.35988 | 217.186 | 26 | 0 | 6.415313 | 407.724 |
| 1320 | 2019 | 1 | -4.48699 | 335.255 | 43 | 2 | 5.329501 | 560.741 |
| 1321 | 2019 | 1 | -5.5641  | 310.64  | 43 | 0 | 5.404042 | 506.256 |
| 1322 | 2019 | 0 | -2.48211 | 400.639 | 51 | 2 | 4.783273 | 514.754 |
| 1323 | 2019 | 1 | -3.5203  | 317.732 | 49 | 1 | 4.986291 | 463.512 |
| 1324 | 2019 | 1 | -8.06668 | 248.124 | 28 | 0 | 5.879601 | 501.356 |
| 1325 | 2019 | 1 | -4.19045 | 320.987 | 41 | 2 | 5.221517 | 501.406 |
| 1326 | 2019 | 1 | -3.91564 | 347.476 | 38 | 3 | 5.476024 | 565.449 |
| 1327 | 2019 | 1 | -4.79401 | 322.572 | 45 | 1 | 5.279937 | 571.487 |
| 1328 | 2019 | 1 | -4.38503 | 341.272 | 44 | 1 | 5.119593 | 519.767 |
| 1329 | 2019 | 1 | -5.31593 | 314.043 | 36 | 2 | 5.66843  | 508.904 |
| 1330 | 2019 | 0 | -4.20769 | 318.57  | 43 | 3 | 4.95145  | 488.611 |
| 1331 | 2019 | 0 | -4.47043 | 303.935 | 41 | 1 | 5.195107 | 513.713 |
| 1332 | 2019 | 1 | -4.061   | 330.015 | 41 | 2 | 5.321926 | 523.361 |
| 1333 | 2019 | 1 | -2.67178 | 364.946 | 50 | 2 | 4.603849 | 583.92  |
| 1334 | 2019 | 1 | -6.16152 | 322.998 | 38 | 0 | 5.854097 | 462.293 |
| 1335 | 2019 | 0 | -3.96623 | 304.299 | 52 | 1 | 5.140466 | 459.523 |
| 1336 | 2019 | 0 | -7.33269 | 184.695 | 33 | 0 | 5.911776 | 469.051 |
| 1337 | 2019 | 1 | -6.43747 | 269.529 | 36 | 0 | 5.95026  | 447.542 |
| 1338 | 2019 | 0 | -7.65899 | 238.94  | 34 | 0 | 5.859651 | 518.333 |
| 1339 | 2019 | 0 | -7.00074 | 299.039 | 36 | 0 | 6.096522 | 389.577 |
| 1340 | 2019 | 1 | -4.45186 | 362.907 | 39 | 1 | 5.173466 | 572.828 |
| 1341 | 2019 | 1 | -2.90229 | 317.849 | 52 | 2 | 4.930131 | 537.539 |
| 1342 | 2019 | 0 | -7.82548 | 322.886 | 28 | 0 | 5.510701 | 528.394 |
| 1343 | 2019 | 1 | -3.93111 | 324.98  | 44 | 2 | 5.178228 | 540.026 |
| 1344 | 2019 | 0 | -4.4831  | 330.103 | 38 | 2 | 5.392603 | 562.945 |
| 1345 | 2019 | 1 | -3.93419 | 340.409 | 38 | 3 | 5.31214  | 548.711 |
| 1346 | 2019 | 0 | -3.66295 | 333.767 | 45 | 2 | 4.952486 | 513.223 |
| 1347 | 2019 | 0 | -3.69199 | 329.98  | 44 | 2 | 4.822085 | 483.68  |
| 1348 | 2019 | 1 | -6.13421 | 286.197 | 41 | 0 | 5.574049 | 513.422 |
| 1349 | 2019 | 1 | -3.9578  | 317.211 | 45 | 1 | 5.123914 | 480.404 |

Table S2 - Anonymized database

|      |      |   |          |         |    |   |          |         |
|------|------|---|----------|---------|----|---|----------|---------|
| 1350 | 2019 | 0 | -3.63914 | 334.62  | 46 | 2 | 4.63291  | 511.473 |
| 1351 | 2019 | 1 | -4.45186 | 362.907 | 39 | 1 | 5.173466 | 572.828 |
| 1352 | 2019 | 1 | -5.84955 | 308.039 | 32 | 0 | 5.886017 | 561.172 |
| 1353 | 2019 | 1 | -4.19045 | 320.987 | 41 | 2 | 5.221517 | 501.406 |
| 1354 | 2019 | 1 | -4.55829 | 313.129 | 39 | 1 | 4.963728 | 501.908 |
| 1355 | 2019 | 1 | -3.93111 | 324.98  | 44 | 2 | 5.178228 | 540.026 |
| 1356 | 2019 | 1 | -4.45186 | 362.907 | 39 | 1 | 5.173466 | 572.828 |
| 1357 | 2019 | 1 | -4.27204 | 308.602 | 41 | 2 | 5.232071 | 467.972 |
| 1358 | 2019 | 0 | -7.00074 | 299.039 | 36 | 0 | 6.096522 | 389.577 |
| 1359 | 2019 | 1 | -5.59907 | 348.703 | 37 | 0 | 5.467555 | 576.059 |
| 1360 | 2019 | 1 | -4.4804  | 331.583 | 42 | 1 | 5.148194 | 518.009 |
| 1361 | 2019 | 1 | -3.87159 | 318.522 | 48 | 1 | 5.018917 | 488.66  |
| 1362 | 2019 | 0 | -7.76235 | 277.011 | 30 | 0 | 6.483886 | 487.437 |
| 1363 | 2019 | 1 | -7.33269 | 184.695 | 33 | 0 | 5.911776 | 469.051 |
| 1364 | 2019 | 1 | -5.24159 | 310.989 | 43 | 0 | 5.287071 | 440.49  |
| 1365 | 2019 | 1 | -3.96623 | 304.299 | 52 | 1 | 5.140466 | 459.523 |
| 1366 | 2019 | 1 | -4.57584 | 303.157 | 40 | 2 | 5.300677 | 463.864 |
| 1367 | 2019 | 1 | -2.67178 | 364.946 | 50 | 2 | 4.603849 | 583.92  |
| 1368 | 2019 | 1 | -6.59369 | 250.609 | 36 | 0 | 5.62224  | 483.596 |
| 1369 | 2019 | 0 | -7.65899 | 238.94  | 34 | 0 | 5.859651 | 518.333 |
| 1370 | 2019 | 0 | -5.6137  | 294.652 | 41 | 0 | 5.426873 | 543.489 |
| 1371 | 2019 | 0 | -4.061   | 330.015 | 41 | 2 | 5.321926 | 523.361 |
| 1372 | 2019 | 0 | -3.96623 | 304.299 | 52 | 1 | 5.140466 | 459.523 |
| 1373 | 2019 | 1 | -6.55951 | 299.438 | 36 | 0 | 6.000892 | 471.31  |
| 1374 | 2019 | 0 | -5.40087 | 309.561 | 36 | 0 | 5.442493 | 484.634 |
| 1375 | 2019 | 0 | -5.45258 | 304.945 | 43 | 0 | 5.550265 | 480.654 |
| 1376 | 2019 | 1 | -4.45186 | 362.907 | 39 | 1 | 5.173466 | 572.828 |
| 1377 | 2019 | 1 | -4.33927 | 330.623 | 43 | 2 | 5.00001  | 502.706 |
| 1378 | 2019 | 1 | -4.30589 | 344.709 | 43 | 2 | 5.10428  | 508.747 |
| 1379 | 2019 | 1 | -4.07084 | 313.487 | 45 | 1 | 5.190497 | 514.185 |
| 1380 | 2019 | 0 | -7.00074 | 299.039 | 36 | 0 | 6.096522 | 389.577 |
| 1381 | 2019 | 0 | -7.65899 | 238.94  | 34 | 0 | 5.859651 | 518.333 |
| 1382 | 2019 | 1 | -4.47043 | 303.935 | 41 | 1 | 5.195107 | 513.713 |
| 1383 | 2019 | 1 | -8.06668 | 248.124 | 28 | 0 | 5.879601 | 501.356 |
| 1384 | 2019 | 0 | -7.82548 | 322.886 | 28 | 0 | 5.510701 | 528.394 |
| 1385 | 2019 | 1 | -3.51463 | 367.233 | 49 | 2 | 5.232931 | 532.969 |
| 1386 | 2019 | 0 | -3.75833 | 320.514 | 50 | 1 | 5.0674   | 485.061 |
| 1387 | 2019 | 1 | -2.81745 | 342.717 | 51 | 2 | 4.929575 | 574.121 |
| 1388 | 2019 | 1 | -4.45186 | 362.907 | 39 | 1 | 5.173466 | 572.828 |
| 1389 | 2019 | 0 | -6.41129 | 269.816 | 36 | 0 | 5.565534 | 563.718 |
| 1390 | 2019 | 1 | -7.82548 | 322.886 | 28 | 0 | 5.510701 | 528.394 |
| 1391 | 2019 | 0 | -8.35988 | 217.186 | 26 | 0 | 6.415313 | 407.724 |
| 1392 | 2019 | 0 | -5.84955 | 308.039 | 32 | 0 | 5.886017 | 561.172 |
| 1393 | 2019 | 0 | -2.67178 | 364.946 | 50 | 2 | 4.603849 | 583.92  |
| 1394 | 2019 | 1 | -6.9887  | 274.518 | 39 | 0 | 6.269623 | 498.654 |
| 1395 | 2019 | 1 | -3.86198 | 325.153 | 44 | 1 | 4.846032 | 504.883 |
| 1396 | 2019 | 0 | -2.08757 | 381.085 | 50 | 3 | 4.534825 | 607.024 |
| 1397 | 2019 | 0 | -2.67178 | 364.946 | 50 | 2 | 4.603849 | 583.92  |
| 1398 | 2019 | 0 | -5.40563 | 339     | 38 | 1 | 5.13232  | 519.911 |
| 1399 | 2019 | 1 | -3.4318  | 319.197 | 46 | 2 | 5.039764 | 515.073 |



**Table S2 - Anonymized database**

|      |      |   |          |         |    |   |          |         |
|------|------|---|----------|---------|----|---|----------|---------|
| 1400 | 2019 | 0 | -4.40974 | 345.852 | 46 | 1 | 5.137047 | 529.694 |
| 1401 | 2019 | 0 | -6.43747 | 269.529 | 36 | 0 | 5.95026  | 447.542 |
| 1402 | 2019 | 1 | -5.45258 | 304.945 | 43 | 0 | 5.550265 | 480.654 |
| 1403 | 2019 | 1 | -4.66312 | 326.279 | 38 | 2 | 5.426116 | 570.167 |
| 1404 | 2019 | 1 | -4.79401 | 322.572 | 45 | 1 | 5.279937 | 571.487 |
| 1405 | 2019 | 1 | -3.28244 | 324.213 | 43 | 2 | 4.698999 | 534.732 |
| 1406 | 2019 | 1 | -5.31593 | 314.043 | 36 | 2 | 5.66843  | 508.904 |
| 1407 | 2019 | 1 | -4.4831  | 330.103 | 38 | 2 | 5.392603 | 562.945 |
| 1408 | 2019 | 0 | -3.55705 | 304.823 | 47 | 2 | 5.08267  | 474.252 |
| 1409 | 2019 | 1 | -3.91564 | 347.476 | 38 | 3 | 5.476024 | 565.449 |
| 1410 | 2019 | 1 | -4.05765 | 338.255 | 40 | 1 | 5.013981 | 520.512 |
| 1411 | 2019 | 1 | -3.55705 | 304.823 | 47 | 2 | 5.08267  | 474.252 |
| 1412 | 2019 | 1 | -6.59369 | 250.609 | 36 | 0 | 5.62224  | 483.596 |
| 1413 | 2019 | 1 | -5.47236 | 416.38  | 34 | 1 | 5.313608 | 622.153 |
| 1414 | 2019 | 1 | -5.31249 | 332.657 | 37 | 1 | 5.727701 | 529.991 |
| 1415 | 2019 | 1 | -5.31593 | 314.043 | 36 | 2 | 5.66843  | 508.904 |
| 1416 | 2019 | 1 | -4.19045 | 320.987 | 41 | 2 | 5.221517 | 501.406 |
| 1417 | 2019 | 1 | -4.41025 | 366.521 | 40 | 1 | 4.98413  | 567.192 |
| 1418 | 2019 | 1 | -3.93111 | 324.98  | 44 | 2 | 5.178228 | 540.026 |
| 1419 | 2019 | 1 | -3.3129  | 348.276 | 48 | 1 | 4.975174 | 484.098 |
| 1420 | 2019 | 1 | -3.55705 | 304.823 | 47 | 2 | 5.08267  | 474.252 |
| 1421 | 2019 | 1 | -5.19449 | 358.12  | 38 | 1 | 5.838659 | 552.653 |
| 1422 | 2019 | 1 | -4.66312 | 326.279 | 38 | 2 | 5.426116 | 570.167 |
| 1423 | 2019 | 1 | -3.5203  | 317.732 | 49 | 1 | 4.986291 | 463.512 |
| 1424 | 2019 | 0 | -5.84955 | 308.039 | 32 | 0 | 5.886017 | 561.172 |
| 1425 | 2019 | 0 | -4.91638 | 309.095 | 41 | 2 | 5.392417 | 497.162 |
| 1426 | 2019 | 1 | -6.17124 | 287.268 | 41 | 0 | 5.625112 | 492.719 |
| 1427 | 2019 | 1 | -2.67178 | 364.946 | 50 | 2 | 4.603849 | 583.92  |
| 1428 | 2019 | 1 | -4.7944  | 356.626 | 44 | 1 | 5.006661 | 556.198 |
| 1429 | 2019 | 1 | -3.76051 | 346.815 | 47 | 2 | 4.898393 | 504.376 |

Table S2 - Anonymized database

| gdd      | dd_rain  | bioc02   | bioc03   | bioc04   | bioc05   | bioc06   | bioc07   | bioc08   |
|----------|----------|----------|----------|----------|----------|----------|----------|----------|
| 2635.501 | 4.419355 | 11.34874 | 0.269688 | 9.466324 | 30.462   | -11.619  | 42.081   | 20.89842 |
| 2635.501 | 4.419355 | 11.34874 | 0.269688 | 9.466324 | 30.462   | -11.619  | 42.081   | 20.89842 |
| 2726.074 | 4.775862 | 11.58785 | 0.276413 | 9.407972 | 30.95929 | -10.963  | 41.92229 | 21.63071 |
| 2726.074 | 4.775862 | 11.58785 | 0.276413 | 9.407972 | 30.95929 | -10.963  | 41.92229 | 21.63071 |
| 2726.074 | 4.775862 | 11.58785 | 0.276413 | 9.407972 | 30.95929 | -10.963  | 41.92229 | 21.63071 |
| 2726.074 | 4.775862 | 11.58785 | 0.276413 | 9.407972 | 30.95929 | -10.963  | 41.92229 | 21.63071 |
| 2726.074 | 4.775862 | 11.58785 | 0.276413 | 9.407972 | 30.95929 | -10.963  | 41.92229 | 21.63071 |
| 2726.074 | 4.775862 | 11.58785 | 0.276413 | 9.407972 | 30.95929 | -10.963  | 41.92229 | 21.63071 |
| 2726.074 | 4.775862 | 11.58785 | 0.276413 | 9.407972 | 30.95929 | -10.963  | 41.92229 | 21.63071 |
| 2746.191 | 4.566667 | 11.07325 | 0.264385 | 9.51727  | 30.81386 | -11.0691 | 41.883   | 21.4006  |
| 2848.788 | 3.820896 | 8.87108  | 0.220209 | 9.588186 | 29.448   | -10.8369 | 40.28486 | 18.12254 |
| 2680.419 | 4.31746  | 11.44254 | 0.271422 | 9.496105 | 30.71857 | -11.4391 | 42.15771 | 21.4881  |
| 2680.419 | 4.31746  | 11.44254 | 0.271422 | 9.496105 | 30.71857 | -11.4391 | 42.15771 | 21.4881  |
| 2680.419 | 4.31746  | 11.44254 | 0.271422 | 9.496105 | 30.71857 | -11.4391 | 42.15771 | 21.4881  |
| 2680.419 | 4.31746  | 11.44254 | 0.271422 | 9.496105 | 30.71857 | -11.4391 | 42.15771 | 21.4881  |
| 3064.826 | 4.181818 | 12.12107 | 0.268995 | 9.801269 | 31.42757 | -13.633  | 45.06057 | 20.40975 |
| 3073.599 | 4.166667 | 11.79277 | 0.261481 | 9.657075 | 31.17871 | -13.9213 | 45.1     | 20.40782 |
| 3151.322 | 4.119403 | 11.31377 | 0.254159 | 9.756036 | 31.54671 | -12.9679 | 44.51457 | 20.11212 |
| 3151.322 | 4.119403 | 11.31377 | 0.254159 | 9.756036 | 31.54671 | -12.9679 | 44.51457 | 20.11212 |
| 2887.812 | 3.913043 | 11.84115 | 0.260928 | 9.662682 | 30.74543 | -14.6354 | 45.38086 | 19.70782 |
| 2887.812 | 3.913043 | 11.84115 | 0.260928 | 9.662682 | 30.74543 | -14.6354 | 45.38086 | 19.70782 |
| 2887.812 | 3.913043 | 11.84115 | 0.260928 | 9.662682 | 30.74543 | -14.6354 | 45.38086 | 19.70782 |
| 2887.812 | 3.913043 | 11.84115 | 0.260928 | 9.662682 | 30.74543 | -14.6354 | 45.38086 | 19.70782 |
| 2887.812 | 3.913043 | 11.84115 | 0.260928 | 9.662682 | 30.74543 | -14.6354 | 45.38086 | 19.70782 |
| 2887.812 | 3.913043 | 11.84115 | 0.260928 | 9.662682 | 30.74543 | -14.6354 | 45.38086 | 19.70782 |
| 2887.812 | 3.913043 | 11.84115 | 0.260928 | 9.662682 | 30.74543 | -14.6354 | 45.38086 | 19.70782 |
| 2887.812 | 3.913043 | 11.84115 | 0.260928 | 9.662682 | 30.74543 | -14.6354 | 45.38086 | 19.70782 |
| 3322.52  | 5.196429 | 10.60134 | 0.26641  | 9.343971 | 32.09771 | -7.69557 | 39.79329 | 21.03012 |
| 3322.52  | 5.196429 | 10.60134 | 0.26641  | 9.343971 | 32.09771 | -7.69557 | 39.79329 | 21.03012 |
| 3192.077 | 5.166667 | 10.88248 | 0.260203 | 9.39656  | 31.336   | -10.487  | 41.823   | 0.303467 |
| 3474.345 | 4.783333 | 10.37154 | 0.256744 | 9.424103 | 32.62914 | -7.76729 | 40.39643 | 21.56245 |
| 3474.345 | 4.783333 | 10.37154 | 0.256744 | 9.424103 | 32.62914 | -7.76729 | 40.39643 | 21.56245 |
| 3474.345 | 4.783333 | 10.37154 | 0.256744 | 9.424103 | 32.62914 | -7.76729 | 40.39643 | 21.56245 |
| 2394.186 | 4.637931 | 12.66384 | 0.288886 | 9.603697 | 29.97729 | -13.8596 | 43.83686 | 17.9426  |
| 2394.186 | 4.637931 | 12.66384 | 0.288886 | 9.603697 | 29.97729 | -13.8596 | 43.83686 | 17.9426  |
| 3194.596 | 6.369565 | 11.50671 | 0.266601 | 9.790155 | 32.58386 | -10.577  | 43.16086 | -0.42936 |
| 2243.37  | 4.301587 | 12.72776 | 0.291234 | 9.516183 | 29.492   | -14.2109 | 43.70286 | 16.04992 |
| 2243.37  | 4.301587 | 12.72776 | 0.291234 | 9.516183 | 29.492   | -14.2109 | 43.70286 | 16.04992 |
| 2243.37  | 4.301587 | 12.72776 | 0.291234 | 9.516183 | 29.492   | -14.2109 | 43.70286 | 16.04992 |
| 2243.37  | 4.301587 | 12.72776 | 0.291234 | 9.516183 | 29.492   | -14.2109 | 43.70286 | 16.04992 |
| 2243.37  | 4.301587 | 12.72776 | 0.291234 | 9.516183 | 29.492   | -14.2109 | 43.70286 | 16.04992 |
| 3116.509 | 5.259259 | 11.55574 | 0.280479 | 9.492325 | 32.22557 | -8.97443 | 41.2     | 0.161187 |
| 3483.082 | 5.557692 | 10.08862 | 0.23643  | 9.769134 | 32.43529 | -10.2354 | 42.67071 | 21.54803 |
| 2677.101 | 4.677966 | 12.00808 | 0.288392 | 9.354972 | 30.54514 | -11.0929 | 41.638   | 21.38553 |
| 2677.101 | 4.677966 | 12.00808 | 0.288392 | 9.354972 | 30.54514 | -11.0929 | 41.638   | 21.38553 |
| 2766.065 | 4.151515 | 11.73557 | 0.268337 | 9.729124 | 30.32571 | -13.4087 | 43.73443 | 18.35269 |
| 2766.065 | 4.151515 | 11.73557 | 0.268337 | 9.729124 | 30.32571 | -13.4087 | 43.73443 | 18.35269 |
| 2766.065 | 4.151515 | 11.73557 | 0.268337 | 9.729124 | 30.32571 | -13.4087 | 43.73443 | 18.35269 |
| 2766.065 | 4.151515 | 11.73557 | 0.268337 | 9.729124 | 30.32571 | -13.4087 | 43.73443 | 18.35269 |
| 2766.065 | 4.151515 | 11.73557 | 0.268337 | 9.729124 | 30.32571 | -13.4087 | 43.73443 | 18.35269 |

Table S2 - Anonymized database

|          |          |          |          |          |          |          |          |          |
|----------|----------|----------|----------|----------|----------|----------|----------|----------|
| 2726.074 | 4.775862 | 11.58785 | 0.276413 | 9.407972 | 30.95929 | -10.963  | 41.92229 | 21.63071 |
| 2726.074 | 4.775862 | 11.58785 | 0.276413 | 9.407972 | 30.95929 | -10.963  | 41.92229 | 21.63071 |
| 2726.074 | 4.775862 | 11.58785 | 0.276413 | 9.407972 | 30.95929 | -10.963  | 41.92229 | 21.63071 |
| 2726.074 | 4.775862 | 11.58785 | 0.276413 | 9.407972 | 30.95929 | -10.963  | 41.92229 | 21.63071 |
| 2726.074 | 4.775862 | 11.58785 | 0.276413 | 9.407972 | 30.95929 | -10.963  | 41.92229 | 21.63071 |
| 2726.074 | 4.775862 | 11.58785 | 0.276413 | 9.407972 | 30.95929 | -10.963  | 41.92229 | 21.63071 |
| 2726.074 | 4.775862 | 11.58785 | 0.276413 | 9.407972 | 30.95929 | -10.963  | 41.92229 | 21.63071 |
| 3126.98  | 5.163636 | 11.74875 | 0.28127  | 9.529702 | 32.55129 | -9.21914 | 41.77043 | 0.209357 |
| 3115.696 | 5.109091 | 11.82259 | 0.270007 | 9.531748 | 31.62229 | -12.164  | 43.78629 | 22.99034 |
| 3115.696 | 5.109091 | 11.82259 | 0.270007 | 9.531748 | 31.62229 | -12.164  | 43.78629 | 22.99034 |
| 3115.696 | 5.109091 | 11.82259 | 0.270007 | 9.531748 | 31.62229 | -12.164  | 43.78629 | 22.99034 |
| 2353.025 | 5.6      | 12.23752 | 0.286805 | 9.577015 | 29.17486 | -13.4936 | 42.66843 | 20.21343 |
| 2353.025 | 5.6      | 12.23752 | 0.286805 | 9.577015 | 29.17486 | -13.4936 | 42.66843 | 20.21343 |
| 2353.025 | 5.6      | 12.23752 | 0.286805 | 9.577015 | 29.17486 | -13.4936 | 42.66843 | 20.21343 |
| 2353.025 | 5.6      | 12.23752 | 0.286805 | 9.577015 | 29.17486 | -13.4936 | 42.66843 | 20.21343 |
| 3279.042 | 4.52459  | 10.46123 | 0.250542 | 9.822431 | 32.29186 | -9.46257 | 41.75443 | 24.18505 |
| 3279.042 | 4.52459  | 10.46123 | 0.250542 | 9.822431 | 32.29186 | -9.46257 | 41.75443 | 24.18505 |
| 2990.964 | 3.852941 | 11.77972 | 0.25882  | 9.655364 | 30.48171 | -15.0314 | 45.51314 | 20.16635 |
| 3220.654 | 4.813559 | 10.51827 | 0.261617 | 9.314387 | 31.37543 | -8.82943 | 40.20486 | 23.32705 |
| 3220.654 | 4.813559 | 10.51827 | 0.261617 | 9.314387 | 31.37543 | -8.82943 | 40.20486 | 23.32705 |
| 2664.713 | 4.724138 | 11.60777 | 0.271668 | 9.607548 | 30.41771 | -12.3101 | 42.72786 | 21.37524 |
| 2664.713 | 4.724138 | 11.60777 | 0.271668 | 9.607548 | 30.41771 | -12.3101 | 42.72786 | 21.37524 |
| 2868.931 | 3.898551 | 13.86803 | 0.29415  | 9.617925 | 31.076   | -16.0701 | 47.14614 | 19.47848 |
| 2868.931 | 3.898551 | 13.86803 | 0.29415  | 9.617925 | 31.076   | -16.0701 | 47.14614 | 19.47848 |
| 2868.931 | 3.898551 | 13.86803 | 0.29415  | 9.617925 | 31.076   | -16.0701 | 47.14614 | 19.47848 |
| 2868.931 | 3.898551 | 13.86803 | 0.29415  | 9.617925 | 31.076   | -16.0701 | 47.14614 | 19.47848 |
| 3075.887 | 4.153846 | 11.62407 | 0.257163 | 9.630664 | 31.08229 | -14.1189 | 45.20114 | 20.30646 |
| 2264.267 | 5.490196 | 11.37267 | 0.270539 | 9.682687 | 28.91757 | -13.1196 | 42.03714 | 19.97095 |
| 2264.267 | 5.490196 | 11.37267 | 0.270539 | 9.682687 | 28.91757 | -13.1196 | 42.03714 | 19.97095 |
| 2264.267 | 5.490196 | 11.37267 | 0.270539 | 9.682687 | 28.91757 | -13.1196 | 42.03714 | 19.97095 |
| 2264.267 | 5.490196 | 11.37267 | 0.270539 | 9.682687 | 28.91757 | -13.1196 | 42.03714 | 19.97095 |
| 2264.267 | 5.490196 | 11.37267 | 0.270539 | 9.682687 | 28.91757 | -13.1196 | 42.03714 | 19.97095 |
| 2264.267 | 5.490196 | 11.37267 | 0.270539 | 9.682687 | 28.91757 | -13.1196 | 42.03714 | 19.97095 |
| 2264.267 | 5.490196 | 11.37267 | 0.270539 | 9.682687 | 28.91757 | -13.1196 | 42.03714 | 19.97095 |
| 2264.267 | 5.490196 | 11.37267 | 0.270539 | 9.682687 | 28.91757 | -13.1196 | 42.03714 | 19.97095 |
| 2595.113 | 3.605634 | 10.89231 | 0.249092 | 9.607472 | 29.23657 | -14.4914 | 43.728   | 18.47964 |
| 2595.113 | 3.605634 | 10.89231 | 0.249092 | 9.607472 | 29.23657 | -14.4914 | 43.728   | 18.47964 |
| 2649.733 | 3.969231 | 11.39242 | 0.264656 | 9.714297 | 29.62157 | -13.4246 | 43.04614 | 17.85072 |
| 2649.733 | 3.969231 | 11.39242 | 0.264656 | 9.714297 | 29.62157 | -13.4246 | 43.04614 | 17.85072 |
| 3395.995 | 5.388889 | 10.53479 | 0.263448 | 9.377698 | 32.267   | -7.72114 | 39.98814 | 21.23821 |
| 2676.135 | 4.927273 | 11.26454 | 0.26263  | 8.987712 | 30.43086 | -12.4604 | 42.89129 | 18.39688 |
| 2676.135 | 4.927273 | 11.26454 | 0.26263  | 8.987712 | 30.43086 | -12.4604 | 42.89129 | 18.39688 |
| 2676.135 | 4.927273 | 11.26454 | 0.26263  | 8.987712 | 30.43086 | -12.4604 | 42.89129 | 18.39688 |
| 2676.135 | 4.927273 | 11.26454 | 0.26263  | 8.987712 | 30.43086 | -12.4604 | 42.89129 | 18.39688 |
| 2676.135 | 4.927273 | 11.26454 | 0.26263  | 8.987712 | 30.43086 | -12.4604 | 42.89129 | 18.39688 |
| 2498.522 | 4.533333 | 10.88513 | 0.254832 | 8.928289 | 29.48414 | -13.2309 | 42.715   | 19.13995 |
| 2974.456 | 4.030769 | 10.95567 | 0.250968 | 8.95459  | 30.55286 | -13.1007 | 43.65357 | 19.55171 |
| 2974.456 | 4.030769 | 10.95567 | 0.250968 | 8.95459  | 30.55286 | -13.1007 | 43.65357 | 19.55171 |
| 2974.456 | 4.030769 | 10.95567 | 0.250968 | 8.95459  | 30.55286 | -13.1007 | 43.65357 | 19.55171 |

Table S2 - Anonymized database

|          |          |          |          |          |          |          |          |          |
|----------|----------|----------|----------|----------|----------|----------|----------|----------|
| 2974.456 | 4.030769 | 10.95567 | 0.250968 | 8.95459  | 30.55286 | -13.1007 | 43.65357 | 19.55171 |
| 2974.456 | 4.030769 | 10.95567 | 0.250968 | 8.95459  | 30.55286 | -13.1007 | 43.65357 | 19.55171 |
| 2974.456 | 4.030769 | 10.95567 | 0.250968 | 8.95459  | 30.55286 | -13.1007 | 43.65357 | 19.55171 |
| 2974.456 | 4.030769 | 10.95567 | 0.250968 | 8.95459  | 30.55286 | -13.1007 | 43.65357 | 19.55171 |
| 3024.132 | 4.030769 | 10.462   | 0.243544 | 8.942156 | 30.22729 | -12.7301 | 42.95743 | 19.63534 |
| 3024.132 | 4.030769 | 10.462   | 0.243544 | 8.942156 | 30.22729 | -12.7301 | 42.95743 | 19.63534 |
| 3024.132 | 4.030769 | 10.462   | 0.243544 | 8.942156 | 30.22729 | -12.7301 | 42.95743 | 19.63534 |
| 2756.934 | 4.566667 | 10.72162 | 0.255948 | 9.032313 | 30.384   | -11.5059 | 41.88986 | 20.65026 |
| 2756.934 | 4.566667 | 10.72162 | 0.255948 | 9.032313 | 30.384   | -11.5059 | 41.88986 | 20.65026 |
| 2799.826 | 4.542373 | 11.07159 | 0.249311 | 9.105087 | 30.57157 | -13.8371 | 44.40871 | 17.4494  |
| 2799.826 | 4.542373 | 11.07159 | 0.249311 | 9.105087 | 30.57157 | -13.8371 | 44.40871 | 17.4494  |
| 2799.826 | 4.542373 | 11.07159 | 0.249311 | 9.105087 | 30.57157 | -13.8371 | 44.40871 | 17.4494  |
| 2942.86  | 3.567164 | 10.37463 | 0.245893 | 8.69951  | 29.838   | -12.3537 | 42.19171 | 15.74591 |
| 2942.86  | 3.567164 | 10.37463 | 0.245893 | 8.69951  | 29.838   | -12.3537 | 42.19171 | 15.74591 |
| 2967.535 | 3.779412 | 10.5232  | 0.244535 | 9.00546  | 29.92871 | -13.1049 | 43.03357 | 19.39375 |
| 2967.535 | 3.779412 | 10.5232  | 0.244535 | 9.00546  | 29.92871 | -13.1049 | 43.03357 | 19.39375 |
| 2967.535 | 3.779412 | 10.5232  | 0.244535 | 9.00546  | 29.92871 | -13.1049 | 43.03357 | 19.39375 |
| 2718.884 | 3.921875 | 8.442255 | 0.208246 | 8.998847 | 28.63929 | -11.9006 | 40.53986 | 14.11862 |
| 2718.884 | 3.921875 | 8.442255 | 0.208246 | 8.998847 | 28.63929 | -11.9006 | 40.53986 | 14.11862 |
| 3087.363 | 4.862069 | 10.02532 | 0.248886 | 9.004414 | 31.52586 | -8.75486 | 40.28071 | 21.9568  |
| 3087.363 | 4.862069 | 10.02532 | 0.248886 | 9.004414 | 31.52586 | -8.75486 | 40.28071 | 21.9568  |
| 3087.363 | 4.862069 | 10.02532 | 0.248886 | 9.004414 | 31.52586 | -8.75486 | 40.28071 | 21.9568  |
| 3087.363 | 4.862069 | 10.02532 | 0.248886 | 9.004414 | 31.52586 | -8.75486 | 40.28071 | 21.9568  |
| 3087.363 | 4.862069 | 10.02532 | 0.248886 | 9.004414 | 31.52586 | -8.75486 | 40.28071 | 21.9568  |
| 3087.363 | 4.862069 | 10.02532 | 0.248886 | 9.004414 | 31.52586 | -8.75486 | 40.28071 | 21.9568  |
| 3087.363 | 4.862069 | 10.02532 | 0.248886 | 9.004414 | 31.52586 | -8.75486 | 40.28071 | 21.9568  |
| 3087.363 | 4.862069 | 10.02532 | 0.248886 | 9.004414 | 31.52586 | -8.75486 | 40.28071 | 21.9568  |
| 2518.368 | 4.459016 | 11.51837 | 0.258096 | 9.220036 | 29.27157 | -15.3567 | 44.62829 | 17.88371 |
| 2807.883 | 4.190476 | 10.83214 | 0.246376 | 9.035814 | 29.79829 | -14.1676 | 43.96586 | 15.21182 |
| 3097.084 | 4.844828 | 10.92389 | 0.266723 | 8.862637 | 31.75329 | -9.20271 | 40.956   | 22.2623  |
| 3097.084 | 4.844828 | 10.92389 | 0.266723 | 8.862637 | 31.75329 | -9.20271 | 40.956   | 22.2623  |
| 3097.084 | 4.844828 | 10.92389 | 0.266723 | 8.862637 | 31.75329 | -9.20271 | 40.956   | 22.2623  |
| 3097.084 | 4.844828 | 10.92389 | 0.266723 | 8.862637 | 31.75329 | -9.20271 | 40.956   | 22.2623  |
| 3097.084 | 4.844828 | 10.92389 | 0.266723 | 8.862637 | 31.75329 | -9.20271 | 40.956   | 22.2623  |
| 3173.256 | 4.862069 | 10.46421 | 0.257957 | 8.889374 | 31.798   | -8.76771 | 40.56571 | 22.57521 |
| 3173.256 | 4.862069 | 10.46421 | 0.257957 | 8.889374 | 31.798   | -8.76771 | 40.56571 | 22.57521 |
| 2953.704 | 3.619718 | 10.85687 | 0.250288 | 8.957851 | 30.26029 | -13.1173 | 43.37757 | 19.42741 |
| 2953.704 | 3.619718 | 10.85687 | 0.250288 | 8.957851 | 30.26029 | -13.1173 | 43.37757 | 19.42741 |
| 2953.704 | 3.619718 | 10.85687 | 0.250288 | 8.957851 | 30.26029 | -13.1173 | 43.37757 | 19.42741 |
| 2742.281 | 4.633333 | 9.584148 | 0.227656 | 9.056959 | 29.57829 | -12.521  | 42.09929 | 18.87965 |
| 2646.493 | 4.689655 | 11.33282 | 0.264203 | 8.937867 | 30.49671 | -12.3977 | 42.89443 | 18.23403 |
| 2999.858 | 4.16129  | 10.43253 | 0.242742 | 8.842099 | 29.89586 | -13.082  | 42.97786 | 19.40637 |
| 3085.205 | 4.7      | 10.54885 | 0.261208 | 8.905989 | 31.41229 | -8.97257 | 40.38486 | 21.88501 |
| 2687.626 | 4.542373 | 10.94315 | 0.247359 | 9.105289 | 29.877   | -14.363  | 44.24    | 17.0018  |
| 2687.626 | 4.542373 | 10.94315 | 0.247359 | 9.105289 | 29.877   | -14.363  | 44.24    | 17.0018  |
| 2687.626 | 4.542373 | 10.94315 | 0.247359 | 9.105289 | 29.877   | -14.363  | 44.24    | 17.0018  |
| 2687.626 | 4.542373 | 10.94315 | 0.247359 | 9.105289 | 29.877   | -14.363  | 44.24    | 17.0018  |
| 2687.626 | 4.542373 | 10.94315 | 0.247359 | 9.105289 | 29.877   | -14.363  | 44.24    | 17.0018  |
| 3118.855 | 4.046875 | 10.26652 | 0.241974 | 8.910968 | 30.34643 | -12.0817 | 42.42814 | 21.63227 |
| 3077.569 | 4.5      | 10.78333 | 0.264992 | 8.648788 | 31.03186 | -9.66114 | 40.693   | 21.40941 |
| 3077.569 | 4.5      | 10.78333 | 0.264992 | 8.648788 | 31.03186 | -9.66114 | 40.693   | 21.40941 |

Table S2 - Anonymized database

|          |          |          |          |          |          |          |          |          |
|----------|----------|----------|----------|----------|----------|----------|----------|----------|
| 2932.246 | 4.689655 | 11.01525 | 0.262471 | 8.700931 | 30.75229 | -11.2153 | 41.96757 | 21.1399  |
| 2829.6   | 3.555556 | 11.10361 | 0.256655 | 8.846986 | 30.21014 | -13.0526 | 43.26271 | 18.90434 |
| 3043.179 | 5.070175 | 10.62666 | 0.26309  | 8.814092 | 31.35014 | -9.04157 | 40.39171 | 20.44843 |
| 3043.179 | 5.070175 | 10.62666 | 0.26309  | 8.814092 | 31.35014 | -9.04157 | 40.39171 | 20.44843 |
| 2933.048 | 4.349206 | 10.49677 | 0.259555 | 8.92375  | 30.85714 | -9.58429 | 40.44143 | 21.28388 |
| 2662.339 | 3.584615 | 10.71813 | 0.259567 | 8.442961 | 27.81257 | -13.4797 | 41.29229 | 17.99148 |
| 2662.339 | 3.584615 | 10.71813 | 0.259567 | 8.442961 | 27.81257 | -13.4797 | 41.29229 | 17.99148 |
| 2662.339 | 3.584615 | 10.71813 | 0.259567 | 8.442961 | 27.81257 | -13.4797 | 41.29229 | 17.99148 |
| 3040.462 | 4.864407 | 10.83357 | 0.264768 | 8.930403 | 31.33086 | -9.58643 | 40.91729 | 21.62754 |
| 3040.462 | 4.864407 | 10.83357 | 0.264768 | 8.930403 | 31.33086 | -9.58643 | 40.91729 | 21.62754 |
| 2662.542 | 4.344262 | 11.35504 | 0.253968 | 9.015101 | 30.02743 | -14.683  | 44.71043 | 16.94557 |
| 2662.542 | 4.344262 | 11.35504 | 0.253968 | 9.015101 | 30.02743 | -14.683  | 44.71043 | 16.94557 |
| 3113.948 | 5.017544 | 9.935632 | 0.247075 | 8.996593 | 31.376   | -8.837   | 40.213   | 22.00392 |
| 2357.397 | 3.742424 | 10.59493 | 0.248061 | 8.643704 | 27.30029 | -15.4107 | 42.711   | 16.92964 |
| 2957.386 | 4.435484 | 10.50273 | 0.259459 | 8.880752 | 30.82643 | -9.65286 | 40.47929 | 21.32689 |
| 2957.386 | 4.435484 | 10.50273 | 0.259459 | 8.880752 | 30.82643 | -9.65286 | 40.47929 | 21.32689 |
| 2957.386 | 4.435484 | 10.50273 | 0.259459 | 8.880752 | 30.82643 | -9.65286 | 40.47929 | 21.32689 |
| 2957.386 | 4.435484 | 10.50273 | 0.259459 | 8.880752 | 30.82643 | -9.65286 | 40.47929 | 21.32689 |
| 2957.386 | 4.435484 | 10.50273 | 0.259459 | 8.880752 | 30.82643 | -9.65286 | 40.47929 | 21.32689 |
| 2957.386 | 4.435484 | 10.50273 | 0.259459 | 8.880752 | 30.82643 | -9.65286 | 40.47929 | 21.32689 |
| 2957.386 | 4.435484 | 10.50273 | 0.259459 | 8.880752 | 30.82643 | -9.65286 | 40.47929 | 21.32689 |
| 2957.386 | 4.435484 | 10.50273 | 0.259459 | 8.880752 | 30.82643 | -9.65286 | 40.47929 | 21.32689 |
| 3038.727 | 4.728814 | 9.828841 | 0.247999 | 8.850262 | 30.594   | -9.03857 | 39.63257 | 21.49053 |
| 3205.848 | 4.79661  | 9.997283 | 0.249281 | 8.916534 | 31.59814 | -8.50629 | 40.10443 | 22.22416 |
| 3205.848 | 4.79661  | 9.997283 | 0.249281 | 8.916534 | 31.59814 | -8.50629 | 40.10443 | 22.22416 |
| 3205.848 | 4.79661  | 9.997283 | 0.249281 | 8.916534 | 31.59814 | -8.50629 | 40.10443 | 22.22416 |
| 3205.848 | 4.79661  | 9.997283 | 0.249281 | 8.916534 | 31.59814 | -8.50629 | 40.10443 | 22.22416 |
| 2661.64  | 4.655172 | 10.23391 | 0.241802 | 9.129539 | 29.50586 | -12.8177 | 42.32357 | 10.81254 |
| 2661.64  | 4.655172 | 10.23391 | 0.241802 | 9.129539 | 29.50586 | -12.8177 | 42.32357 | 10.81254 |
| 2661.64  | 4.655172 | 10.23391 | 0.241802 | 9.129539 | 29.50586 | -12.8177 | 42.32357 | 10.81254 |
| 2661.64  | 4.655172 | 10.23391 | 0.241802 | 9.129539 | 29.50586 | -12.8177 | 42.32357 | 10.81254 |
| 2699.456 | 4.15873  | 11.4184  | 0.255565 | 9.0218   | 30.08986 | -14.5891 | 44.679   | 17.1172  |
| 2699.456 | 4.15873  | 11.4184  | 0.255565 | 9.0218   | 30.08986 | -14.5891 | 44.679   | 17.1172  |
| 3079.782 | 4.881356 | 10.29174 | 0.256636 | 8.817044 | 31.299   | -8.80343 | 40.10243 | 20.54207 |
| 3079.782 | 4.881356 | 10.29174 | 0.256636 | 8.817044 | 31.299   | -8.80343 | 40.10243 | 20.54207 |
| 3077.479 | 4.516129 | 10.7899  | 0.264113 | 8.651458 | 31.12286 | -9.73043 | 40.85329 | 21.44169 |
| 3077.479 | 4.516129 | 10.7899  | 0.264113 | 8.651458 | 31.12286 | -9.73043 | 40.85329 | 21.44169 |
| 3077.479 | 4.516129 | 10.7899  | 0.264113 | 8.651458 | 31.12286 | -9.73043 | 40.85329 | 21.44169 |
| 3077.479 | 4.516129 | 10.7899  | 0.264113 | 8.651458 | 31.12286 | -9.73043 | 40.85329 | 21.44169 |
| 2418.186 | 5.074074 | 10.82791 | 0.252969 | 9.258108 | 28.88971 | -13.9136 | 42.80329 | 9.588137 |
| 2418.186 | 5.074074 | 10.82791 | 0.252969 | 9.258108 | 28.88971 | -13.9136 | 42.80329 | 9.588137 |
| 2418.186 | 5.074074 | 10.82791 | 0.252969 | 9.258108 | 28.88971 | -13.9136 | 42.80329 | 9.588137 |
| 2983.579 | 3.666667 | 10.66051 | 0.247424 | 9.000824 | 30.092   | -12.994  | 43.086   | 19.47402 |
| 2798.628 | 4.55     | 10.7441  | 0.257734 | 8.935147 | 30.38557 | -11.3011 | 41.68671 | 20.63604 |
| 2798.628 | 4.55     | 10.7441  | 0.257734 | 8.935147 | 30.38557 | -11.3011 | 41.68671 | 20.63604 |
| 2798.628 | 4.55     | 10.7441  | 0.257734 | 8.935147 | 30.38557 | -11.3011 | 41.68671 | 20.63604 |
| 2798.628 | 4.55     | 10.7441  | 0.257734 | 8.935147 | 30.38557 | -11.3011 | 41.68671 | 20.63604 |
| 2997.876 | 3.628571 | 9.728728 | 0.199229 | 10.38832 | 30.502   | -18.3299 | 48.83186 | 11.54672 |
| 3107.093 | 4.142857 | 9.710563 | 0.207432 | 9.789497 | 31.84643 | -14.9669 | 46.81329 | 23.03582 |
| 3098.235 | 3.681159 | 10.21051 | 0.210982 | 9.867865 | 32.21043 | -16.1847 | 48.39514 | 22.24348 |

Table S2 - Anonymized database

|          |          |          |          |          |          |          |          |          |
|----------|----------|----------|----------|----------|----------|----------|----------|----------|
| 3165.654 | 3.861538 | 10.13024 | 0.211984 | 9.836112 | 32.23414 | -15.5536 | 47.78771 | 23.38162 |
| 2608.77  | 3.089744 | 10.0864  | 0.207026 | 10.27747 | 29.37543 | -19.345  | 48.72043 | 15.08832 |
| 2946.573 | 4.245902 | 9.848574 | 0.205241 | 9.931942 | 31.47729 | -16.5081 | 47.98543 | 21.71282 |
| 3147.001 | 4.360656 | 9.714091 | 0.204356 | 9.888559 | 31.95743 | -15.5777 | 47.53514 | 22.418   |
| 3549.178 | 3.513889 | 8.810376 | 0.189544 | 10.04027 | 33.38714 | -13.0947 | 46.48186 | 14.22411 |
| 2939.377 | 3.541667 | 9.598382 | 0.194586 | 10.42902 | 30.412   | -18.9151 | 49.32714 | 11.47931 |
| 2952.344 | 3.424658 | 9.764739 | 0.196614 | 10.43063 | 30.56929 | -19.0951 | 49.66443 | 11.56935 |
| 2976.449 | 3.135135 | 10.30886 | 0.204694 | 10.20132 | 30.60614 | -19.7561 | 50.36229 | 21.2319  |
| 2976.449 | 3.135135 | 10.30886 | 0.204694 | 10.20132 | 30.60614 | -19.7561 | 50.36229 | 21.2319  |
| 2950.969 | 3.96875  | 9.887997 | 0.201203 | 10.06161 | 31.76386 | -17.3804 | 49.14429 | 21.69484 |
| 2950.969 | 3.96875  | 9.887997 | 0.201203 | 10.06161 | 31.76386 | -17.3804 | 49.14429 | 21.69484 |
| 2989.027 | 3.361111 | 9.706876 | 0.196767 | 10.39114 | 30.61429 | -18.7176 | 49.33186 | 22.89026 |
| 2506.682 | 3.637681 | 8.851797 | 0.185123 | 10.22822 | 28.75129 | -19.0644 | 47.81571 | 19.48459 |
| 3024.271 | 4.216667 | 9.909769 | 0.203664 | 10.06437 | 31.67271 | -16.9847 | 48.65743 | 22.78604 |
| 3024.271 | 4.216667 | 9.909769 | 0.203664 | 10.06437 | 31.67271 | -16.9847 | 48.65743 | 22.78604 |
| 3222.86  | 4.288136 | 8.841277 | 0.182143 | 10.18231 | 32.28086 | -16.2594 | 48.54029 | 23.67093 |
| 3042.166 | 3.681818 | 9.684217 | 0.200545 | 9.978877 | 31.73586 | -16.5537 | 48.28957 | 21.85101 |
| 3030.293 | 3.450704 | 9.858533 | 0.198719 | 10.33327 | 30.87457 | -18.7359 | 49.61043 | 11.79528 |
| 3184.869 | 4.079365 | 9.347069 | 0.202388 | 9.779507 | 31.50871 | -14.6751 | 46.18386 | 23.39989 |
| 2554.498 | 3.731343 | 10.29718 | 0.213109 | 10.02711 | 30.34971 | -17.9691 | 48.31886 | 19.85525 |
| 3129.049 | 4.2      | 9.489887 | 0.194885 | 10.12341 | 32.04429 | -16.6506 | 48.69486 | 23.24579 |
| 3158.928 | 4.125    | 9.289349 | 0.195812 | 9.996184 | 31.92857 | -15.5116 | 47.44014 | 22.46529 |
| 3339.664 | 4.174603 | 9.129423 | 0.19655  | 9.850078 | 32.232   | -14.2164 | 46.44843 | 13.57277 |
| 2961.49  | 3.833333 | 9.770547 | 0.203823 | 9.890176 | 31.73357 | -16.2029 | 47.93643 | 21.72685 |
| 3065.358 | 3.764706 | 9.782505 | 0.206515 | 9.84485  | 31.603   | -15.7666 | 47.36957 | 22.95677 |
| 3053.863 | 3.907692 | 9.975404 | 0.209832 | 9.816095 | 31.66843 | -15.8716 | 47.54    | 22.87124 |
| 3053.863 | 3.907692 | 9.975404 | 0.209832 | 9.816095 | 31.66843 | -15.8716 | 47.54    | 22.87124 |
| 2610.051 | 3.213333 | 9.584712 | 0.202486 | 10.53074 | 29.096   | -18.2391 | 47.33514 | 15.18559 |
| 3132.831 | 3.742424 | 9.895681 | 0.207888 | 9.981043 | 31.94986 | -15.6511 | 47.601   | 22.23615 |
| 3132.831 | 3.742424 | 9.895681 | 0.207888 | 9.981043 | 31.94986 | -15.6511 | 47.601   | 22.23615 |
| 2689.903 | 3.217949 | 9.952698 | 0.20402  | 10.44442 | 29.31957 | -19.4633 | 48.78286 | 13.32329 |
| 2689.903 | 3.217949 | 9.952698 | 0.20402  | 10.44442 | 29.31957 | -19.4633 | 48.78286 | 13.32329 |
| 2922.614 | 3.236111 | 10.04527 | 0.198393 | 10.28965 | 30.32329 | -20.31   | 50.63329 | 21.06594 |
| 3355.584 | 3.823529 | 8.960777 | 0.194525 | 9.82302  | 32.09971 | -13.9653 | 46.065   | 23.33846 |
| 3161.414 | 3.818182 | 9.904945 | 0.208156 | 9.826251 | 32.09357 | -15.4906 | 47.58414 | 23.34493 |
| 2816.375 | 4.225806 | 10.11058 | 0.201421 | 10.25443 | 31.65743 | -18.5389 | 50.19629 | 21.09371 |
| 2931.519 | 3.565217 | 10.45095 | 0.204561 | 10.23607 | 30.358   | -20.7317 | 51.08971 | 11.21097 |
| 2931.519 | 3.565217 | 10.45095 | 0.204561 | 10.23607 | 30.358   | -20.7317 | 51.08971 | 11.21097 |
| 2931.519 | 3.565217 | 10.45095 | 0.204561 | 10.23607 | 30.358   | -20.7317 | 51.08971 | 11.21097 |
| 2931.519 | 3.565217 | 10.45095 | 0.204561 | 10.23607 | 30.358   | -20.7317 | 51.08971 | 11.21097 |
| 2662.224 | 3.742424 | 9.530261 | 0.19745  | 10.28178 | 29.99014 | -18.2766 | 48.26671 | 20.23103 |
| 2662.224 | 3.742424 | 9.530261 | 0.19745  | 10.28178 | 29.99014 | -18.2766 | 48.26671 | 20.23103 |
| 3020.883 | 4.112903 | 9.512231 | 0.202034 | 9.840979 | 31.40357 | -15.6789 | 47.08243 | 21.8846  |
| 2992.128 | 3.380282 | 10.1615  | 0.200691 | 10.28589 | 30.84043 | -19.7921 | 50.63257 | 11.59315 |
| 2334.449 | 3.444444 | 9.741253 | 0.198649 | 10.44967 | 28.95714 | -20.0804 | 49.03757 | 20.41729 |
| 2979.006 | 3.514286 | 9.7355   | 0.197383 | 10.40052 | 30.39414 | -18.9287 | 49.32286 | 22.82912 |
| 2979.006 | 3.514286 | 9.7355   | 0.197383 | 10.40052 | 30.39414 | -18.9287 | 49.32286 | 22.82912 |
| 2484.856 | 3.637681 | 10.41304 | 0.208482 | 10.37992 | 29.147   | -20.8    | 49.947   | 19.61129 |
| 2870.028 | 3.830769 | 9.322591 | 0.191365 | 10.07967 | 31.28729 | -17.429  | 48.71629 | 22.80193 |
| 2870.028 | 3.830769 | 9.322591 | 0.191365 | 10.07967 | 31.28729 | -17.429  | 48.71629 | 22.80193 |

Table S2 - Anonymized database

|          |          |          |          |          |          |          |          |          |
|----------|----------|----------|----------|----------|----------|----------|----------|----------|
| 2870.028 | 3.830769 | 9.322591 | 0.191365 | 10.07967 | 31.28729 | -17.429  | 48.71629 | 22.80193 |
| 2718.073 | 3.12     | 9.238385 | 0.192095 | 10.2745  | 28.56386 | -19.529  | 48.09286 | 20.09524 |
| 2606.346 | 3.632353 | 10.4301  | 0.211153 | 9.995482 | 31.43443 | -17.9614 | 49.39586 | 19.88637 |
| 2786.908 | 3.492958 | 9.800266 | 0.210128 | 10.2229  | 30.51757 | -16.122  | 46.63957 | 22.05495 |
| 2786.908 | 3.492958 | 9.800266 | 0.210128 | 10.2229  | 30.51757 | -16.122  | 46.63957 | 22.05495 |
| 2786.908 | 3.492958 | 9.800266 | 0.210128 | 10.2229  | 30.51757 | -16.122  | 46.63957 | 22.05495 |
| 3123.806 | 4.09375  | 9.686827 | 0.205102 | 9.774654 | 31.555   | -15.6743 | 47.22929 | 23.08931 |
| 3007.729 | 3.923077 | 9.609654 | 0.200674 | 9.936124 | 32.10071 | -15.7863 | 47.887   | 21.88538 |
| 3007.729 | 3.923077 | 9.609654 | 0.200674 | 9.936124 | 32.10071 | -15.7863 | 47.887   | 21.88538 |
| 3007.729 | 3.923077 | 9.609654 | 0.200674 | 9.936124 | 32.10071 | -15.7863 | 47.887   | 21.88538 |
| 2719.538 | 3.80597  | 10.14394 | 0.204419 | 10.16886 | 31.16057 | -18.4626 | 49.62314 | 20.62244 |
| 2719.538 | 3.80597  | 10.14394 | 0.204419 | 10.16886 | 31.16057 | -18.4626 | 49.62314 | 20.62244 |
| 2832.254 | 3.757576 | 10.66365 | 0.212504 | 10.19024 | 32.00971 | -18.1711 | 50.18086 | 21.19691 |
| 3063.674 | 3.892308 | 9.501245 | 0.202792 | 9.763144 | 31.00114 | -15.851  | 46.85214 | 21.86049 |
| 3063.674 | 3.892308 | 9.501245 | 0.202792 | 9.763144 | 31.00114 | -15.851  | 46.85214 | 21.86049 |
| 2926.277 | 3.8      | 10.21629 | 0.214888 | 10.05581 | 30.92871 | -16.6137 | 47.54243 | 21.35853 |
| 2926.277 | 3.8      | 10.21629 | 0.214888 | 10.05581 | 30.92871 | -16.6137 | 47.54243 | 21.35853 |
| 2860.531 | 3.444444 | 9.393533 | 0.200529 | 10.19238 | 30.72586 | -16.118  | 46.84386 | 22.39519 |
| 2860.531 | 3.444444 | 9.393533 | 0.200529 | 10.19238 | 30.72586 | -16.118  | 46.84386 | 22.39519 |
| 3253.218 | 4.274194 | 9.606536 | 0.202983 | 9.875097 | 32.23571 | -15.091  | 47.32671 | 13.2132  |
| 3253.218 | 4.274194 | 9.606536 | 0.202983 | 9.875097 | 32.23571 | -15.091  | 47.32671 | 13.2132  |
| 3253.218 | 4.274194 | 9.606536 | 0.202983 | 9.875097 | 32.23571 | -15.091  | 47.32671 | 13.2132  |
| 3146.171 | 4.129032 | 9.04708  | 0.188025 | 10.1896  | 32.14929 | -15.9671 | 48.11643 | 23.42611 |
| 3146.171 | 4.129032 | 9.04708  | 0.188025 | 10.1896  | 32.14929 | -15.9671 | 48.11643 | 23.42611 |
| 2715.243 | 3.597222 | 10.52134 | 0.209668 | 10.40458 | 29.67014 | -20.5107 | 50.18086 | 13.72431 |
| 2715.243 | 3.597222 | 10.52134 | 0.209668 | 10.40458 | 29.67014 | -20.5107 | 50.18086 | 13.72431 |
| 2955.56  | 4.147541 | 9.553184 | 0.195655 | 10.03982 | 31.40329 | -17.4234 | 48.82671 | 21.63962 |
| 2955.56  | 4.147541 | 9.553184 | 0.195655 | 10.03982 | 31.40329 | -17.4234 | 48.82671 | 21.63962 |
| 2396.535 | 3.337838 | 10.65104 | 0.212531 | 10.44231 | 28.519   | -21.5961 | 50.11514 | 19.19645 |
| 3052.366 | 4.129032 | 9.698566 | 0.200726 | 10.05568 | 31.85843 | -16.459  | 48.31743 | 22.07512 |
| 2746.081 | 3.081081 | 9.047838 | 0.191149 | 10.30719 | 28.64843 | -18.6854 | 47.33386 | 10.59751 |
| 2746.081 | 3.081081 | 9.047838 | 0.191149 | 10.30719 | 28.64843 | -18.6854 | 47.33386 | 10.59751 |
| 3066.458 | 4.095238 | 10.02045 | 0.20307  | 10.07719 | 31.792   | -17.5527 | 49.34471 | 22.81733 |
| 3066.458 | 4.095238 | 10.02045 | 0.20307  | 10.07719 | 31.792   | -17.5527 | 49.34471 | 22.81733 |
| 2923.503 | 3.148649 | 10.07393 | 0.197836 | 10.34481 | 30.52557 | -20.395  | 50.92057 | 22.45725 |
| 2923.503 | 3.148649 | 10.07393 | 0.197836 | 10.34481 | 30.52557 | -20.395  | 50.92057 | 22.45725 |
| 2923.503 | 3.148649 | 10.07393 | 0.197836 | 10.34481 | 30.52557 | -20.395  | 50.92057 | 22.45725 |
| 2923.503 | 3.148649 | 10.07393 | 0.197836 | 10.34481 | 30.52557 | -20.395  | 50.92057 | 22.45725 |
| 2997.424 | 3.865672 | 9.59628  | 0.200211 | 9.834272 | 31.40686 | -16.524  | 47.93086 | 21.7804  |
| 3080.584 | 4.131148 | 9.272258 | 0.191442 | 10.11107 | 32.01786 | -16.416  | 48.43386 | 23.07747 |
| 3041.622 | 3.066667 | 10.70262 | 0.210772 | 10.22507 | 30.71586 | -20.0623 | 50.77814 | 19.18052 |
| 3016.139 | 3.478873 | 9.383418 | 0.190313 | 10.37424 | 30.54371 | -18.7614 | 49.30514 | 21.4313  |
| 3016.139 | 3.478873 | 9.383418 | 0.190313 | 10.37424 | 30.54371 | -18.7614 | 49.30514 | 21.4313  |
| 3088.305 | 4.35     | 9.927816 | 0.204093 | 10.03794 | 32.08886 | -16.5547 | 48.64357 | 22.1844  |
| 3088.305 | 4.35     | 9.927816 | 0.204093 | 10.03794 | 32.08886 | -16.5547 | 48.64357 | 22.1844  |
| 2626.119 | 3.089744 | 9.693341 | 0.202767 | 10.41368 | 29.196   | -18.6094 | 47.80543 | 13.31518 |
| 2626.119 | 3.089744 | 9.693341 | 0.202767 | 10.41368 | 29.196   | -18.6094 | 47.80543 | 13.31518 |
| 2626.119 | 3.089744 | 9.693341 | 0.202767 | 10.41368 | 29.196   | -18.6094 | 47.80543 | 13.31518 |
| 3096.618 | 4.063492 | 9.568456 | 0.202182 | 9.796947 | 31.35657 | -15.9694 | 47.326   | 22.03666 |
| 3096.618 | 4.063492 | 9.568456 | 0.202182 | 9.796947 | 31.35657 | -15.9694 | 47.326   | 22.03666 |

Table S2 - Anonymized database

|          |          |          |          |          |          |          |          |          |
|----------|----------|----------|----------|----------|----------|----------|----------|----------|
| 2593.717 | 3.441176 | 9.290489 | 0.195748 | 10.15841 | 28.16857 | -19.2929 | 47.46143 | 19.6807  |
| 2593.717 | 3.441176 | 9.290489 | 0.195748 | 10.15841 | 28.16857 | -19.2929 | 47.46143 | 19.6807  |
| 3089.078 | 3.850746 | 10.15646 | 0.208547 | 9.921092 | 32.163   | -16.5381 | 48.70114 | 23.13301 |
| 3089.078 | 3.850746 | 10.15646 | 0.208547 | 9.921092 | 32.163   | -16.5381 | 48.70114 | 23.13301 |
| 3089.078 | 3.850746 | 10.15646 | 0.208547 | 9.921092 | 32.163   | -16.5381 | 48.70114 | 23.13301 |
| 3089.078 | 3.850746 | 10.15646 | 0.208547 | 9.921092 | 32.163   | -16.5381 | 48.70114 | 23.13301 |
| 3079.435 | 3.342466 | 9.668865 | 0.194996 | 10.36921 | 31.41586 | -18.1691 | 49.585   | 23.25553 |
| 3132.089 | 4.15873  | 9.632898 | 0.203246 | 10.0056  | 32.07814 | -15.3171 | 47.39529 | 22.36384 |
| 3132.089 | 4.15873  | 9.632898 | 0.203246 | 10.0056  | 32.07814 | -15.3171 | 47.39529 | 22.36384 |
| 3052.728 | 4.09375  | 10.09171 | 0.206352 | 9.916827 | 32.14229 | -16.7631 | 48.90543 | 22.94353 |
| 3052.728 | 4.09375  | 10.09171 | 0.206352 | 9.916827 | 32.14229 | -16.7631 | 48.90543 | 22.94353 |
| 3052.728 | 4.09375  | 10.09171 | 0.206352 | 9.916827 | 32.14229 | -16.7631 | 48.90543 | 22.94353 |
| 3052.728 | 4.09375  | 10.09171 | 0.206352 | 9.916827 | 32.14229 | -16.7631 | 48.90543 | 22.94353 |
| 3025.46  | 4.03125  | 9.863706 | 0.207216 | 9.835521 | 31.501   | -16.1    | 47.601   | 22.77145 |
| 3052.728 | 4.09375  | 10.09171 | 0.206352 | 9.916827 | 32.14229 | -16.7631 | 48.90543 | 22.94353 |
| 3052.728 | 4.09375  | 10.09171 | 0.206352 | 9.916827 | 32.14229 | -16.7631 | 48.90543 | 22.94353 |
| 2844.379 | 3.457143 | 9.777613 | 0.196765 | 10.34554 | 29.874   | -19.8179 | 49.69186 | 17.44609 |
| 2844.379 | 3.457143 | 9.777613 | 0.196765 | 10.34554 | 29.874   | -19.8179 | 49.69186 | 17.44609 |
| 2703.508 | 3.637681 | 10.27859 | 0.206883 | 10.33822 | 30.76129 | -18.9217 | 49.683   | 20.56579 |
| 2703.508 | 3.637681 | 10.27859 | 0.206883 | 10.33822 | 30.76129 | -18.9217 | 49.683   | 20.56579 |
| 2703.508 | 3.637681 | 10.27859 | 0.206883 | 10.33822 | 30.76129 | -18.9217 | 49.683   | 20.56579 |
| 2550.962 | 3.486111 | 9.757453 | 0.199574 | 10.23631 | 30.00514 | -18.8861 | 48.89129 | 20.20426 |
| 2578.469 | 3.108108 | 8.448527 | 0.179642 | 10.28123 | 27.71686 | -19.313  | 47.02986 | 19.43304 |
| 3101.577 | 4.0625   | 9.365044 | 0.20081  | 9.821972 | 31.23814 | -15.3983 | 46.63643 | 22.05755 |
| 3101.577 | 4.0625   | 9.365044 | 0.20081  | 9.821972 | 31.23814 | -15.3983 | 46.63643 | 22.05755 |
| 3009.203 | 3.628571 | 9.71153  | 0.197405 | 10.3599  | 30.71229 | -18.4837 | 49.196   | 11.6938  |
| 3009.203 | 3.628571 | 9.71153  | 0.197405 | 10.3599  | 30.71229 | -18.4837 | 49.196   | 11.6938  |
| 3009.203 | 3.628571 | 9.71153  | 0.197405 | 10.3599  | 30.71229 | -18.4837 | 49.196   | 11.6938  |
| 2617.909 | 3.608696 | 10.25447 | 0.209609 | 10.15016 | 30.47357 | -18.4484 | 48.922   | 21.03759 |
| 2617.909 | 3.608696 | 10.25447 | 0.209609 | 10.15016 | 30.47357 | -18.4484 | 48.922   | 21.03759 |
| 2617.909 | 3.608696 | 10.25447 | 0.209609 | 10.15016 | 30.47357 | -18.4484 | 48.922   | 21.03759 |
| 2617.909 | 3.608696 | 10.25447 | 0.209609 | 10.15016 | 30.47357 | -18.4484 | 48.922   | 21.03759 |
| 3345.531 | 3.791045 | 9.12561  | 0.193741 | 9.919523 | 32.98914 | -14.113  | 47.10214 | 13.41591 |
| 3345.531 | 3.791045 | 9.12561  | 0.193741 | 9.919523 | 32.98914 | -14.113  | 47.10214 | 13.41591 |
| 3345.531 | 3.791045 | 9.12561  | 0.193741 | 9.919523 | 32.98914 | -14.113  | 47.10214 | 13.41591 |
| 3157.675 | 4.131148 | 9.31247  | 0.192054 | 10.1149  | 32.12743 | -16.3613 | 48.48871 | 22.48246 |
| 3157.675 | 4.131148 | 9.31247  | 0.192054 | 10.1149  | 32.12743 | -16.3613 | 48.48871 | 22.48246 |
| 3157.675 | 4.131148 | 9.31247  | 0.192054 | 10.1149  | 32.12743 | -16.3613 | 48.48871 | 22.48246 |
| 3071.319 | 3.118421 | 10.67653 | 0.210396 | 10.22518 | 31.22514 | -19.5197 | 50.74486 | 19.21593 |
| 3071.319 | 3.118421 | 10.67653 | 0.210396 | 10.22518 | 31.22514 | -19.5197 | 50.74486 | 19.21593 |
| 3071.319 | 3.118421 | 10.67653 | 0.210396 | 10.22518 | 31.22514 | -19.5197 | 50.74486 | 19.21593 |
| 2969.13  | 3.876923 | 9.648569 | 0.198923 | 10.03029 | 31.83686 | -16.6673 | 48.50414 | 21.68879 |
| 2969.13  | 3.876923 | 9.648569 | 0.198923 | 10.03029 | 31.83686 | -16.6673 | 48.50414 | 21.68879 |
| 2987.64  | 3.585714 | 9.621104 | 0.194823 | 10.3977  | 30.63357 | -18.7501 | 49.38371 | 22.88703 |
| 2987.64  | 3.585714 | 9.621104 | 0.194823 | 10.3977  | 30.63357 | -18.7501 | 49.38371 | 22.88703 |
| 2987.64  | 3.585714 | 9.621104 | 0.194823 | 10.3977  | 30.63357 | -18.7501 | 49.38371 | 22.88703 |
| 2987.64  | 3.585714 | 9.621104 | 0.194823 | 10.3977  | 30.63357 | -18.7501 | 49.38371 | 22.88703 |
| 2987.64  | 3.585714 | 9.621104 | 0.194823 | 10.3977  | 30.63357 | -18.7501 | 49.38371 | 22.88703 |
| 2833.384 | 3.666667 | 10.54802 | 0.218217 | 10.18309 | 31.266   | -17.0713 | 48.33729 | 21.86225 |
| 2833.384 | 3.666667 | 10.54802 | 0.218217 | 10.18309 | 31.266   | -17.0713 | 48.33729 | 21.86225 |



Table S2 - Anonymized database

|          |          |          |          |          |          |          |          |          |
|----------|----------|----------|----------|----------|----------|----------|----------|----------|
| 3036.646 | 4.245902 | 9.330536 | 0.193925 | 10.15762 | 31.97314 | -16.141  | 48.11414 | 22.95326 |
| 3036.646 | 4.245902 | 9.330536 | 0.193925 | 10.15762 | 31.97314 | -16.141  | 48.11414 | 22.95326 |
| 3036.646 | 4.245902 | 9.330536 | 0.193925 | 10.15762 | 31.97314 | -16.141  | 48.11414 | 22.95326 |
| 2971.976 | 3.507042 | 9.839538 | 0.196129 | 10.30251 | 30.57086 | -19.5979 | 50.16871 | 11.47576 |
| 2971.976 | 3.507042 | 9.839538 | 0.196129 | 10.30251 | 30.57086 | -19.5979 | 50.16871 | 11.47576 |
| 2971.976 | 3.507042 | 9.839538 | 0.196129 | 10.30251 | 30.57086 | -19.5979 | 50.16871 | 11.47576 |
| 2355.08  | 3.507042 | 11.32059 | 0.223415 | 10.31362 | 29.91371 | -20.7569 | 50.67057 | 18.80301 |
| 2355.08  | 3.507042 | 11.32059 | 0.223415 | 10.31362 | 29.91371 | -20.7569 | 50.67057 | 18.80301 |
| 3039.765 | 4.16129  | 9.341959 | 0.20026  | 9.829737 | 31.31429 | -15.3349 | 46.64914 | 21.90146 |
| 3039.765 | 4.16129  | 9.341959 | 0.20026  | 9.829737 | 31.31429 | -15.3349 | 46.64914 | 21.90146 |
| 3039.765 | 4.16129  | 9.341959 | 0.20026  | 9.829737 | 31.31429 | -15.3349 | 46.64914 | 21.90146 |
| 3039.765 | 4.16129  | 9.341959 | 0.20026  | 9.829737 | 31.31429 | -15.3349 | 46.64914 | 21.90146 |
| 3039.765 | 4.16129  | 9.341959 | 0.20026  | 9.829737 | 31.31429 | -15.3349 | 46.64914 | 21.90146 |
| 3039.765 | 4.16129  | 9.341959 | 0.20026  | 9.829737 | 31.31429 | -15.3349 | 46.64914 | 21.90146 |
| 2438.76  | 3.666667 | 10.27292 | 0.207676 | 10.36404 | 29.74414 | -19.722  | 49.46614 | 20.88198 |
| 2438.76  | 3.666667 | 10.27292 | 0.207676 | 10.36404 | 29.74414 | -19.722  | 49.46614 | 20.88198 |
| 2438.76  | 3.666667 | 10.27292 | 0.207676 | 10.36404 | 29.74414 | -19.722  | 49.46614 | 20.88198 |
| 2438.76  | 3.666667 | 10.27292 | 0.207676 | 10.36404 | 29.74414 | -19.722  | 49.46614 | 20.88198 |
| 3036.521 | 4.098361 | 9.444434 | 0.194661 | 10.04042 | 31.90829 | -16.609  | 48.51729 | 21.97524 |
| 3036.521 | 4.098361 | 9.444434 | 0.194661 | 10.04042 | 31.90829 | -16.609  | 48.51729 | 21.97524 |
| 3036.521 | 4.098361 | 9.444434 | 0.194661 | 10.04042 | 31.90829 | -16.609  | 48.51729 | 21.97524 |
| 3036.521 | 4.098361 | 9.444434 | 0.194661 | 10.04042 | 31.90829 | -16.609  | 48.51729 | 21.97524 |
| 2345.926 | 3.266667 | 9.0665   | 0.186425 | 10.52026 | 28.78571 | -19.8477 | 48.63343 | 20.50251 |
| 2345.926 | 3.266667 | 9.0665   | 0.186425 | 10.52026 | 28.78571 | -19.8477 | 48.63343 | 20.50251 |
| 2345.926 | 3.266667 | 9.0665   | 0.186425 | 10.52026 | 28.78571 | -19.8477 | 48.63343 | 20.50251 |
| 2729.098 | 3.833333 | 10.26425 | 0.20757  | 10.15239 | 31.23957 | -18.2101 | 49.44971 | 20.62871 |
| 2729.098 | 3.833333 | 10.26425 | 0.20757  | 10.15239 | 31.23957 | -18.2101 | 49.44971 | 20.62871 |
| 2729.098 | 3.833333 | 10.26425 | 0.20757  | 10.15239 | 31.23957 | -18.2101 | 49.44971 | 20.62871 |
| 2729.098 | 3.833333 | 10.26425 | 0.20757  | 10.15239 | 31.23957 | -18.2101 | 49.44971 | 20.62871 |
| 2729.098 | 3.833333 | 10.26425 | 0.20757  | 10.15239 | 31.23957 | -18.2101 | 49.44971 | 20.62871 |
| 2513.247 | 3.088608 | 9.5855   | 0.203461 | 10.44502 | 28.597   | -18.5153 | 47.11229 | 13.03295 |
| 2513.247 | 3.088608 | 9.5855   | 0.203461 | 10.44502 | 28.597   | -18.5153 | 47.11229 | 13.03295 |
| 2513.247 | 3.088608 | 9.5855   | 0.203461 | 10.44502 | 28.597   | -18.5153 | 47.11229 | 13.03295 |
| 2513.247 | 3.088608 | 9.5855   | 0.203461 | 10.44502 | 28.597   | -18.5153 | 47.11229 | 13.03295 |
| 3146.277 | 4.163934 | 8.829821 | 0.191257 | 9.872304 | 31.41214 | -14.7553 | 46.16743 | 22.35059 |
| 3146.277 | 4.163934 | 8.829821 | 0.191257 | 9.872304 | 31.41214 | -14.7553 | 46.16743 | 22.35059 |
| 3146.277 | 4.163934 | 8.829821 | 0.191257 | 9.872304 | 31.41214 | -14.7553 | 46.16743 | 22.35059 |
| 3146.277 | 4.163934 | 8.829821 | 0.191257 | 9.872304 | 31.41214 | -14.7553 | 46.16743 | 22.35059 |
| 3047.869 | 3.56338  | 9.76008  | 0.198343 | 10.34188 | 30.90171 | -18.3063 | 49.208   | 11.8681  |
| 3047.869 | 3.56338  | 9.76008  | 0.198343 | 10.34188 | 30.90171 | -18.3063 | 49.208   | 11.8681  |
| 3047.869 | 3.56338  | 9.76008  | 0.198343 | 10.34188 | 30.90171 | -18.3063 | 49.208   | 11.8681  |
| 3124.07  | 3.848485 | 9.289995 | 0.197856 | 9.90706  | 31.66843 | -15.2849 | 46.95329 | 22.29269 |
| 3124.07  | 3.848485 | 9.289995 | 0.197856 | 9.90706  | 31.66843 | -15.2849 | 46.95329 | 22.29269 |
| 3124.07  | 3.848485 | 9.289995 | 0.197856 | 9.90706  | 31.66843 | -15.2849 | 46.95329 | 22.29269 |
| 3011.265 | 4.078125 | 10.22993 | 0.208462 | 9.95724  | 31.96543 | -17.1079 | 49.07329 | 22.03953 |
| 3011.265 | 4.078125 | 10.22993 | 0.208462 | 9.95724  | 31.96543 | -17.1079 | 49.07329 | 22.03953 |
| 3011.265 | 4.078125 | 10.22993 | 0.208462 | 9.95724  | 31.96543 | -17.1079 | 49.07329 | 22.03953 |
| 2206.389 | 3.434211 | 9.759786 | 0.202076 | 10.26453 | 27.81157 | -20.4861 | 48.29771 | 18.98945 |
| 2206.389 | 3.434211 | 9.759786 | 0.202076 | 10.26453 | 27.81157 | -20.4861 | 48.29771 | 18.98945 |
| 2206.389 | 3.434211 | 9.759786 | 0.202076 | 10.26453 | 27.81157 | -20.4861 | 48.29771 | 18.98945 |

Table S2 - Anonymized database

|          |          |          |          |          |          |          |          |          |
|----------|----------|----------|----------|----------|----------|----------|----------|----------|
| 2206.389 | 3.434211 | 9.759786 | 0.202076 | 10.26453 | 27.81157 | -20.4861 | 48.29771 | 18.98945 |
| 2818.002 | 3.118421 | 10.37036 | 0.198005 | 10.45229 | 30.28257 | -22.0917 | 52.37429 | 22.04617 |
| 2818.002 | 3.118421 | 10.37036 | 0.198005 | 10.45229 | 30.28257 | -22.0917 | 52.37429 | 22.04617 |
| 2818.002 | 3.118421 | 10.37036 | 0.198005 | 10.45229 | 30.28257 | -22.0917 | 52.37429 | 22.04617 |
| 2818.002 | 3.118421 | 10.37036 | 0.198005 | 10.45229 | 30.28257 | -22.0917 | 52.37429 | 22.04617 |
| 2818.002 | 3.118421 | 10.37036 | 0.198005 | 10.45229 | 30.28257 | -22.0917 | 52.37429 | 22.04617 |
| 2818.002 | 3.118421 | 10.37036 | 0.198005 | 10.45229 | 30.28257 | -22.0917 | 52.37429 | 22.04617 |
| 2774.309 | 3.521739 | 9.703014 | 0.202362 | 9.963909 | 30.53629 | -17.4124 | 47.94871 | 20.75152 |
| 2774.309 | 3.521739 | 9.703014 | 0.202362 | 9.963909 | 30.53629 | -17.4124 | 47.94871 | 20.75152 |
| 2774.309 | 3.521739 | 9.703014 | 0.202362 | 9.963909 | 30.53629 | -17.4124 | 47.94871 | 20.75152 |
| 2774.309 | 3.521739 | 9.703014 | 0.202362 | 9.963909 | 30.53629 | -17.4124 | 47.94871 | 20.75152 |
| 2940.962 | 3.907692 | 9.768635 | 0.205861 | 9.845118 | 31.60629 | -15.8463 | 47.45257 | 21.61192 |
| 2940.962 | 3.907692 | 9.768635 | 0.205861 | 9.845118 | 31.60629 | -15.8463 | 47.45257 | 21.61192 |
| 2940.962 | 3.907692 | 9.768635 | 0.205861 | 9.845118 | 31.60629 | -15.8463 | 47.45257 | 21.61192 |
| 2940.962 | 3.907692 | 9.768635 | 0.205861 | 9.845118 | 31.60629 | -15.8463 | 47.45257 | 21.61192 |
| 2940.962 | 3.907692 | 9.768635 | 0.205861 | 9.845118 | 31.60629 | -15.8463 | 47.45257 | 21.61192 |
| 2940.962 | 3.907692 | 9.768635 | 0.205861 | 9.845118 | 31.60629 | -15.8463 | 47.45257 | 21.61192 |
| 2940.962 | 3.907692 | 9.768635 | 0.205861 | 9.845118 | 31.60629 | -15.8463 | 47.45257 | 21.61192 |
| 2940.962 | 3.907692 | 9.768635 | 0.205861 | 9.845118 | 31.60629 | -15.8463 | 47.45257 | 21.61192 |
| 2940.962 | 3.907692 | 9.768635 | 0.205861 | 9.845118 | 31.60629 | -15.8463 | 47.45257 | 21.61192 |
| 2940.962 | 3.907692 | 9.768635 | 0.205861 | 9.845118 | 31.60629 | -15.8463 | 47.45257 | 21.61192 |
| 2940.962 | 3.907692 | 9.768635 | 0.205861 | 9.845118 | 31.60629 | -15.8463 | 47.45257 | 21.61192 |
| 3043.4   | 4.666667 | 8.338459 | 0.183626 | 9.777416 | 30.71686 | -14.6931 | 45.41    | 21.82645 |
| 3043.4   | 4.666667 | 8.338459 | 0.183626 | 9.777416 | 30.71686 | -14.6931 | 45.41    | 21.82645 |
| 3043.4   | 4.666667 | 8.338459 | 0.183626 | 9.777416 | 30.71686 | -14.6931 | 45.41    | 21.82645 |
| 3043.4   | 4.666667 | 8.338459 | 0.183626 | 9.777416 | 30.71686 | -14.6931 | 45.41    | 21.82645 |
| 2720.62  | 3.924242 | 9.211519 | 0.193151 | 10.20257 | 30.18943 | -17.5013 | 47.69071 | 20.48316 |
| 2720.62  | 3.924242 | 9.211519 | 0.193151 | 10.20257 | 30.18943 | -17.5013 | 47.69071 | 20.48316 |
| 2720.62  | 3.924242 | 9.211519 | 0.193151 | 10.20257 | 30.18943 | -17.5013 | 47.69071 | 20.48316 |
| 2720.62  | 3.924242 | 9.211519 | 0.193151 | 10.20257 | 30.18943 | -17.5013 | 47.69071 | 20.48316 |
| 2720.62  | 3.924242 | 9.211519 | 0.193151 | 10.20257 | 30.18943 | -17.5013 | 47.69071 | 20.48316 |
| 2720.62  | 3.924242 | 9.211519 | 0.193151 | 10.20257 | 30.18943 | -17.5013 | 47.69071 | 20.48316 |
| 2720.62  | 3.924242 | 9.211519 | 0.193151 | 10.20257 | 30.18943 | -17.5013 | 47.69071 | 20.48316 |
| 2720.62  | 3.924242 | 9.211519 | 0.193151 | 10.20257 | 30.18943 | -17.5013 | 47.69071 | 20.48316 |
| 2720.62  | 3.924242 | 9.211519 | 0.193151 | 10.20257 | 30.18943 | -17.5013 | 47.69071 | 20.48316 |
| 2720.62  | 3.924242 | 9.211519 | 0.193151 | 10.20257 | 30.18943 | -17.5013 | 47.69071 | 20.48316 |
| 2720.62  | 3.924242 | 9.211519 | 0.193151 | 10.20257 | 30.18943 | -17.5013 | 47.69071 | 20.48316 |
| 2887.812 | 3.913043 | 11.84115 | 0.260928 | 9.662682 | 30.74543 | -14.6354 | 45.38086 | 19.70782 |
| 2726.074 | 4.775862 | 11.58785 | 0.276413 | 9.407972 | 30.95929 | -10.963  | 41.92229 | 21.63071 |
| 2766.065 | 4.151515 | 11.73557 | 0.268337 | 9.729124 | 30.32571 | -13.4087 | 43.73443 | 18.35269 |
| 3227.156 | 5.764706 | 11.46446 | 0.262674 | 9.709424 | 32.16843 | -11.4769 | 43.64529 | -0.05249 |
| 3474.345 | 4.783333 | 10.37154 | 0.256744 | 9.424103 | 32.62914 | -7.76729 | 40.39643 | 21.56245 |
| 2680.419 | 4.31746  | 11.44254 | 0.271422 | 9.496105 | 30.71857 | -11.4391 | 42.15771 | 21.4881  |
| 2766.065 | 4.151515 | 11.73557 | 0.268337 | 9.729124 | 30.32571 | -13.4087 | 43.73443 | 18.35269 |
| 3279.042 | 4.52459  | 10.46123 | 0.250542 | 9.822431 | 32.29186 | -9.46257 | 41.75443 | 24.18505 |
| 2726.074 | 4.775862 | 11.58785 | 0.276413 | 9.407972 | 30.95929 | -10.963  | 41.92229 | 21.63071 |
| 3073.599 | 4.166667 | 11.79277 | 0.261481 | 9.657075 | 31.17871 | -13.9213 | 45.1     | 20.40782 |
| 2394.186 | 4.637931 | 12.66384 | 0.288886 | 9.603697 | 29.97729 | -13.8596 | 43.83686 | 17.9426  |
| 2726.074 | 4.775862 | 11.58785 | 0.276413 | 9.407972 | 30.95929 | -10.963  | 41.92229 | 21.63071 |
| 2726.074 | 4.775862 | 11.58785 | 0.276413 | 9.407972 | 30.95929 | -10.963  | 41.92229 | 21.63071 |
| 2243.37  | 4.301587 | 12.72776 | 0.291234 | 9.516183 | 29.492   | -14.2109 | 43.70286 | 16.04992 |
| 2677.101 | 4.677966 | 12.00808 | 0.288392 | 9.354972 | 30.54514 | -11.0929 | 41.638   | 21.38553 |
| 3028.424 | 5.035714 | 11.37895 | 0.278446 | 9.508713 | 31.75771 | -9.10814 | 40.86586 | -0.22815 |

Table S2 - Anonymized database

|          |          |          |          |          |          |          |          |          |
|----------|----------|----------|----------|----------|----------|----------|----------|----------|
| 2726.074 | 4.775862 | 11.58785 | 0.276413 | 9.407972 | 30.95929 | -10.963  | 41.92229 | 21.63071 |
| 2635.501 | 4.419355 | 11.34874 | 0.269688 | 9.466324 | 30.462   | -11.619  | 42.081   | 20.89842 |
| 2726.074 | 4.775862 | 11.58785 | 0.276413 | 9.407972 | 30.95929 | -10.963  | 41.92229 | 21.63071 |
| 2797.137 | 4.6      | 12.16245 | 0.27444  | 9.758158 | 30.54471 | -13.7727 | 44.31743 | 19.6041  |
| 3149.185 | 5.351852 | 12.01897 | 0.284084 | 9.509554 | 32.63986 | -9.668   | 42.30786 | 0.352786 |
| 2848.788 | 3.820896 | 8.87108  | 0.220209 | 9.588186 | 29.448   | -10.8369 | 40.28486 | 18.12254 |
| 2680.419 | 4.31746  | 11.44254 | 0.271422 | 9.496105 | 30.71857 | -11.4391 | 42.15771 | 21.4881  |
| 2726.074 | 4.775862 | 11.58785 | 0.276413 | 9.407972 | 30.95929 | -10.963  | 41.92229 | 21.63071 |
| 2680.419 | 4.31746  | 11.44254 | 0.271422 | 9.496105 | 30.71857 | -11.4391 | 42.15771 | 21.4881  |
| 2595.113 | 3.605634 | 10.89231 | 0.249092 | 9.607472 | 29.23657 | -14.4914 | 43.728   | 18.47964 |
| 2595.113 | 3.605634 | 10.89231 | 0.249092 | 9.607472 | 29.23657 | -14.4914 | 43.728   | 18.47964 |
| 2680.419 | 4.31746  | 11.44254 | 0.271422 | 9.496105 | 30.71857 | -11.4391 | 42.15771 | 21.4881  |
| 2664.713 | 4.724138 | 11.60777 | 0.271668 | 9.607548 | 30.41771 | -12.3101 | 42.72786 | 21.37524 |
| 3028.424 | 5.035714 | 11.37895 | 0.278446 | 9.508713 | 31.75771 | -9.10814 | 40.86586 | -0.22815 |
| 2766.065 | 4.151515 | 11.73557 | 0.268337 | 9.729124 | 30.32571 | -13.4087 | 43.73443 | 18.35269 |
| 2726.074 | 4.775862 | 11.58785 | 0.276413 | 9.407972 | 30.95929 | -10.963  | 41.92229 | 21.63071 |
| 3102.646 | 5.461538 | 11.78565 | 0.282757 | 9.468715 | 32.14257 | -9.53857 | 41.68114 | 0.21083  |
| 3079.366 | 5.142857 | 11.17254 | 0.269231 | 9.602149 | 31.90286 | -9.59514 | 41.498   | -0.31046 |
| 2990.964 | 3.852941 | 11.77972 | 0.25882  | 9.655364 | 30.48171 | -15.0314 | 45.51314 | 20.16635 |
| 3236.887 | 5.5      | 10.4307  | 0.255932 | 9.40033  | 31.69629 | -9.05943 | 40.75571 | 20.69466 |
| 2635.501 | 4.419355 | 11.34874 | 0.269688 | 9.466324 | 30.462   | -11.619  | 42.081   | 20.89842 |
| 2664.713 | 4.724138 | 11.60777 | 0.271668 | 9.607548 | 30.41771 | -12.3101 | 42.72786 | 21.37524 |
| 3040.069 | 3.985294 | 11.61803 | 0.259429 | 9.707729 | 31.03271 | -13.7504 | 44.78314 | 20.27443 |
| 2887.812 | 3.913043 | 11.84115 | 0.260928 | 9.662682 | 30.74543 | -14.6354 | 45.38086 | 19.70782 |
| 3116.509 | 5.259259 | 11.55574 | 0.280479 | 9.492325 | 32.22557 | -8.97443 | 41.2     | 0.161187 |
| 3149.185 | 5.351852 | 12.01897 | 0.284084 | 9.509554 | 32.63986 | -9.668   | 42.30786 | 0.352786 |
| 2726.074 | 4.775862 | 11.58785 | 0.276413 | 9.407972 | 30.95929 | -10.963  | 41.92229 | 21.63071 |
| 3236.887 | 5.5      | 10.4307  | 0.255932 | 9.40033  | 31.69629 | -9.05943 | 40.75571 | 20.69466 |
| 2868.931 | 3.898551 | 13.86803 | 0.29415  | 9.617925 | 31.076   | -16.0701 | 47.14614 | 19.47848 |
| 2848.788 | 3.820896 | 8.87108  | 0.220209 | 9.588186 | 29.448   | -10.8369 | 40.28486 | 18.12254 |
| 2726.074 | 4.775862 | 11.58785 | 0.276413 | 9.407972 | 30.95929 | -10.963  | 41.92229 | 21.63071 |
| 2677.101 | 4.677966 | 12.00808 | 0.288392 | 9.354972 | 30.54514 | -11.0929 | 41.638   | 21.38553 |
| 3064.826 | 4.181818 | 12.12107 | 0.268995 | 9.801269 | 31.42757 | -13.633  | 45.06057 | 20.40975 |
| 3274.577 | 5.259259 | 10.92509 | 0.259147 | 9.779255 | 32.21114 | -9.94671 | 42.15786 | 21.05133 |
| 3395.995 | 5.388889 | 10.53479 | 0.263448 | 9.377698 | 32.267   | -7.72114 | 39.98814 | 21.23821 |
| 2677.101 | 4.677966 | 12.00808 | 0.288392 | 9.354972 | 30.54514 | -11.0929 | 41.638   | 21.38553 |
| 3151.322 | 4.119403 | 11.31377 | 0.254159 | 9.756036 | 31.54671 | -12.9679 | 44.51457 | 20.11212 |
| 2664.713 | 4.724138 | 11.60777 | 0.271668 | 9.607548 | 30.41771 | -12.3101 | 42.72786 | 21.37524 |
| 2766.065 | 4.151515 | 11.73557 | 0.268337 | 9.729124 | 30.32571 | -13.4087 | 43.73443 | 18.35269 |
| 2726.074 | 4.775862 | 11.58785 | 0.276413 | 9.407972 | 30.95929 | -10.963  | 41.92229 | 21.63071 |
| 3193.935 | 5.017544 | 12.02356 | 0.289988 | 9.423629 | 32.07857 | -9.38371 | 41.46229 | 0.690434 |
| 3044.721 | 6        | 12.24529 | 0.277662 | 9.768518 | 32.79886 | -11.3026 | 44.10143 | -0.90751 |
| 2868.931 | 3.898551 | 13.86803 | 0.29415  | 9.617925 | 31.076   | -16.0701 | 47.14614 | 19.47848 |
| 3395.995 | 5.388889 | 10.53479 | 0.263448 | 9.377698 | 32.267   | -7.72114 | 39.98814 | 21.23821 |
| 2264.267 | 5.490196 | 11.37267 | 0.270539 | 9.682687 | 28.91757 | -13.1196 | 42.03714 | 19.97095 |
| 2726.074 | 4.775862 | 11.58785 | 0.276413 | 9.407972 | 30.95929 | -10.963  | 41.92229 | 21.63071 |
| 3056.344 | 5.259259 | 11.86426 | 0.28171  | 9.499051 | 32.16957 | -9.94557 | 42.11514 | 0.011604 |
| 2353.025 | 5.6      | 12.23752 | 0.286805 | 9.577015 | 29.17486 | -13.4936 | 42.66843 | 20.21343 |
| 2243.37  | 4.301587 | 12.72776 | 0.291234 | 9.516183 | 29.492   | -14.2109 | 43.70286 | 16.04992 |
| 3483.082 | 5.557692 | 10.08862 | 0.23643  | 9.769134 | 32.43529 | -10.2354 | 42.67071 | 21.54803 |

Table S2 - Anonymized database

|          |          |          |          |          |          |          |          |          |
|----------|----------|----------|----------|----------|----------|----------|----------|----------|
| 3028.424 | 5.035714 | 11.37895 | 0.278446 | 9.508713 | 31.75771 | -9.10814 | 40.86586 | -0.22815 |
| 3274.577 | 5.259259 | 10.92509 | 0.259147 | 9.779255 | 32.21114 | -9.94671 | 42.15786 | 21.05133 |
| 2726.074 | 4.775862 | 11.58785 | 0.276413 | 9.407972 | 30.95929 | -10.963  | 41.92229 | 21.63071 |
| 2353.025 | 5.6      | 12.23752 | 0.286805 | 9.577015 | 29.17486 | -13.4936 | 42.66843 | 20.21343 |
| 2766.065 | 4.151515 | 11.73557 | 0.268337 | 9.729124 | 30.32571 | -13.4087 | 43.73443 | 18.35269 |
| 2649.733 | 3.969231 | 11.39242 | 0.264656 | 9.714297 | 29.62157 | -13.4246 | 43.04614 | 17.85072 |
| 2243.37  | 4.301587 | 12.72776 | 0.291234 | 9.516183 | 29.492   | -14.2109 | 43.70286 | 16.04992 |
| 2726.074 | 4.775862 | 11.58785 | 0.276413 | 9.407972 | 30.95929 | -10.963  | 41.92229 | 21.63071 |
| 2726.074 | 4.775862 | 11.58785 | 0.276413 | 9.407972 | 30.95929 | -10.963  | 41.92229 | 21.63071 |
| 3064.826 | 4.181818 | 12.12107 | 0.268995 | 9.801269 | 31.42757 | -13.633  | 45.06057 | 20.40975 |
| 2848.788 | 3.820896 | 8.87108  | 0.220209 | 9.588186 | 29.448   | -10.8369 | 40.28486 | 18.12254 |
| 2243.37  | 4.301587 | 12.72776 | 0.291234 | 9.516183 | 29.492   | -14.2109 | 43.70286 | 16.04992 |
| 3126.98  | 5.163636 | 11.74875 | 0.28127  | 9.529702 | 32.55129 | -9.21914 | 41.77043 | 0.209357 |
| 2868.931 | 3.898551 | 13.86803 | 0.29415  | 9.617925 | 31.076   | -16.0701 | 47.14614 | 19.47848 |
| 2848.788 | 3.820896 | 8.87108  | 0.220209 | 9.588186 | 29.448   | -10.8369 | 40.28486 | 18.12254 |
| 3064.826 | 4.181818 | 12.12107 | 0.268995 | 9.801269 | 31.42757 | -13.633  | 45.06057 | 20.40975 |
| 3126.98  | 5.163636 | 11.74875 | 0.28127  | 9.529702 | 32.55129 | -9.21914 | 41.77043 | 0.209357 |
| 3064.826 | 4.181818 | 12.12107 | 0.268995 | 9.801269 | 31.42757 | -13.633  | 45.06057 | 20.40975 |
| 2726.074 | 4.775862 | 11.58785 | 0.276413 | 9.407972 | 30.95929 | -10.963  | 41.92229 | 21.63071 |
| 2264.267 | 5.490196 | 11.37267 | 0.270539 | 9.682687 | 28.91757 | -13.1196 | 42.03714 | 19.97095 |
| 2726.074 | 4.775862 | 11.58785 | 0.276413 | 9.407972 | 30.95929 | -10.963  | 41.92229 | 21.63071 |
| 2243.37  | 4.301587 | 12.72776 | 0.291234 | 9.516183 | 29.492   | -14.2109 | 43.70286 | 16.04992 |
| 3483.082 | 5.557692 | 10.08862 | 0.23643  | 9.769134 | 32.43529 | -10.2354 | 42.67071 | 21.54803 |
| 2868.931 | 3.898551 | 13.86803 | 0.29415  | 9.617925 | 31.076   | -16.0701 | 47.14614 | 19.47848 |
| 2726.074 | 4.775862 | 11.58785 | 0.276413 | 9.407972 | 30.95929 | -10.963  | 41.92229 | 21.63071 |
| 3193.935 | 5.017544 | 12.02356 | 0.289988 | 9.423629 | 32.07857 | -9.38371 | 41.46229 | 0.690434 |
| 3194.596 | 6.369565 | 11.50671 | 0.266601 | 9.790155 | 32.58386 | -10.577  | 43.16086 | -0.42936 |
| 3395.995 | 5.388889 | 10.53479 | 0.263448 | 9.377698 | 32.267   | -7.72114 | 39.98814 | 21.23821 |
| 2243.37  | 4.301587 | 12.72776 | 0.291234 | 9.516183 | 29.492   | -14.2109 | 43.70286 | 16.04992 |
| 2243.37  | 4.301587 | 12.72776 | 0.291234 | 9.516183 | 29.492   | -14.2109 | 43.70286 | 16.04992 |
| 3483.082 | 5.557692 | 10.08862 | 0.23643  | 9.769134 | 32.43529 | -10.2354 | 42.67071 | 21.54803 |
| 2677.101 | 4.677966 | 12.00808 | 0.288392 | 9.354972 | 30.54514 | -11.0929 | 41.638   | 21.38553 |
| 3322.52  | 5.196429 | 10.60134 | 0.26641  | 9.343971 | 32.09771 | -7.69557 | 39.79329 | 21.03012 |
| 3056.344 | 5.259259 | 11.86426 | 0.28171  | 9.499051 | 32.16957 | -9.94557 | 42.11514 | 0.011604 |
| 2243.37  | 4.301587 | 12.72776 | 0.291234 | 9.516183 | 29.492   | -14.2109 | 43.70286 | 16.04992 |
| 2680.419 | 4.31746  | 11.44254 | 0.271422 | 9.496105 | 30.71857 | -11.4391 | 42.15771 | 21.4881  |
| 3179.685 | 4.847458 | 11.90968 | 0.284568 | 9.472485 | 32.63014 | -9.22171 | 41.85186 | 0.573214 |
| 2264.267 | 5.490196 | 11.37267 | 0.270539 | 9.682687 | 28.91757 | -13.1196 | 42.03714 | 19.97095 |
| 3175.236 | 3.970149 | 10.86033 | 0.246713 | 9.629837 | 31.165   | -12.8551 | 44.02014 | 20.82295 |
| 2677.101 | 4.677966 | 12.00808 | 0.288392 | 9.354972 | 30.54514 | -11.0929 | 41.638   | 21.38553 |
| 2243.37  | 4.301587 | 12.72776 | 0.291234 | 9.516183 | 29.492   | -14.2109 | 43.70286 | 16.04992 |
| 3115.696 | 5.109091 | 11.82259 | 0.270007 | 9.531748 | 31.62229 | -12.164  | 43.78629 | 22.99034 |
| 3064.826 | 4.181818 | 12.12107 | 0.268995 | 9.801269 | 31.42757 | -13.633  | 45.06057 | 20.40975 |
| 2677.101 | 4.677966 | 12.00808 | 0.288392 | 9.354972 | 30.54514 | -11.0929 | 41.638   | 21.38553 |
| 2887.812 | 3.913043 | 11.84115 | 0.260928 | 9.662682 | 30.74543 | -14.6354 | 45.38086 | 19.70782 |
| 3115.696 | 5.109091 | 11.82259 | 0.270007 | 9.531748 | 31.62229 | -12.164  | 43.78629 | 22.99034 |
| 3131.78  | 5.705882 | 11.75005 | 0.281206 | 9.412608 | 32.16186 | -9.62257 | 41.78443 | 0.459989 |
| 2766.065 | 4.151515 | 11.73557 | 0.268337 | 9.729124 | 30.32571 | -13.4087 | 43.73443 | 18.35269 |
| 2848.788 | 3.820896 | 8.87108  | 0.220209 | 9.588186 | 29.448   | -10.8369 | 40.28486 | 18.12254 |
| 2680.419 | 4.31746  | 11.44254 | 0.271422 | 9.496105 | 30.71857 | -11.4391 | 42.15771 | 21.4881  |

Table S2 - Anonymized database

|          |          |          |          |          |          |          |          |          |
|----------|----------|----------|----------|----------|----------|----------|----------|----------|
| 3131.78  | 5.705882 | 11.75005 | 0.281206 | 9.412608 | 32.16186 | -9.62257 | 41.78443 | 0.459989 |
| 3483.082 | 5.557692 | 10.08862 | 0.23643  | 9.769134 | 32.43529 | -10.2354 | 42.67071 | 21.54803 |
| 3395.995 | 5.388889 | 10.53479 | 0.263448 | 9.377698 | 32.267   | -7.72114 | 39.98814 | 21.23821 |
| 2264.267 | 5.490196 | 11.37267 | 0.270539 | 9.682687 | 28.91757 | -13.1196 | 42.03714 | 19.97095 |
| 2726.074 | 4.775862 | 11.58785 | 0.276413 | 9.407972 | 30.95929 | -10.963  | 41.92229 | 21.63071 |
| 2726.074 | 4.775862 | 11.58785 | 0.276413 | 9.407972 | 30.95929 | -10.963  | 41.92229 | 21.63071 |
| 2810.948 | 5.415094 | 10.69609 | 0.250334 | 9.695685 | 30.62543 | -12.1019 | 42.72729 | 19.40664 |
| 2677.101 | 4.677966 | 12.00808 | 0.288392 | 9.354972 | 30.54514 | -11.0929 | 41.638   | 21.38553 |
| 2353.025 | 5.6      | 12.23752 | 0.286805 | 9.577015 | 29.17486 | -13.4936 | 42.66843 | 20.21343 |
| 2635.501 | 4.419355 | 11.34874 | 0.269688 | 9.466324 | 30.462   | -11.619  | 42.081   | 20.89842 |
| 3315.923 | 4.716667 | 11.4316  | 0.27779  | 9.46296  | 32.57943 | -8.57257 | 41.152   | 21.11505 |
| 2726.074 | 4.775862 | 11.58785 | 0.276413 | 9.407972 | 30.95929 | -10.963  | 41.92229 | 21.63071 |
| 2635.501 | 4.419355 | 11.34874 | 0.269688 | 9.466324 | 30.462   | -11.619  | 42.081   | 20.89842 |
| 2887.812 | 3.913043 | 11.84115 | 0.260928 | 9.662682 | 30.74543 | -14.6354 | 45.38086 | 19.70782 |
| 2635.501 | 4.419355 | 11.34874 | 0.269688 | 9.466324 | 30.462   | -11.619  | 42.081   | 20.89842 |
| 2766.065 | 4.151515 | 11.73557 | 0.268337 | 9.729124 | 30.32571 | -13.4087 | 43.73443 | 18.35269 |
| 3194.596 | 6.369565 | 11.50671 | 0.266601 | 9.790155 | 32.58386 | -10.577  | 43.16086 | -0.42936 |
| 3115.696 | 5.109091 | 11.82259 | 0.270007 | 9.531748 | 31.62229 | -12.164  | 43.78629 | 22.99034 |
| 2887.812 | 3.913043 | 11.84115 | 0.260928 | 9.662682 | 30.74543 | -14.6354 | 45.38086 | 19.70782 |
| 2595.113 | 3.605634 | 10.89231 | 0.249092 | 9.607472 | 29.23657 | -14.4914 | 43.728   | 18.47964 |
| 3149.185 | 5.351852 | 12.01897 | 0.284084 | 9.509554 | 32.63986 | -9.668   | 42.30786 | 0.352786 |
| 2726.074 | 4.775862 | 11.58785 | 0.276413 | 9.407972 | 30.95929 | -10.963  | 41.92229 | 21.63071 |
| 2264.267 | 5.490196 | 11.37267 | 0.270539 | 9.682687 | 28.91757 | -13.1196 | 42.03714 | 19.97095 |
| 3115.696 | 5.109091 | 11.82259 | 0.270007 | 9.531748 | 31.62229 | -12.164  | 43.78629 | 22.99034 |
| 3193.935 | 5.017544 | 12.02356 | 0.289988 | 9.423629 | 32.07857 | -9.38371 | 41.46229 | 0.690434 |
| 2887.812 | 3.913043 | 11.84115 | 0.260928 | 9.662682 | 30.74543 | -14.6354 | 45.38086 | 19.70782 |
| 2353.025 | 5.6      | 12.23752 | 0.286805 | 9.577015 | 29.17486 | -13.4936 | 42.66843 | 20.21343 |
| 3300.713 | 4.965517 | 11.43246 | 0.277964 | 9.426942 | 32.93186 | -8.19743 | 41.12929 | 21.16282 |
| 2243.37  | 4.301587 | 12.72776 | 0.291234 | 9.516183 | 29.492   | -14.2109 | 43.70286 | 16.04992 |
| 2664.713 | 4.724138 | 11.60777 | 0.271668 | 9.607548 | 30.41771 | -12.3101 | 42.72786 | 21.37524 |
| 2726.074 | 4.775862 | 11.58785 | 0.276413 | 9.407972 | 30.95929 | -10.963  | 41.92229 | 21.63071 |
| 3193.935 | 5.017544 | 12.02356 | 0.289988 | 9.423629 | 32.07857 | -9.38371 | 41.46229 | 0.690434 |
| 2726.074 | 4.775862 | 11.58785 | 0.276413 | 9.407972 | 30.95929 | -10.963  | 41.92229 | 21.63071 |
| 2868.931 | 3.898551 | 13.86803 | 0.29415  | 9.617925 | 31.076   | -16.0701 | 47.14614 | 19.47848 |
| 3483.082 | 5.557692 | 10.08862 | 0.23643  | 9.769134 | 32.43529 | -10.2354 | 42.67071 | 21.54803 |
| 2677.101 | 4.677966 | 12.00808 | 0.288392 | 9.354972 | 30.54514 | -11.0929 | 41.638   | 21.38553 |
| 2726.074 | 4.775862 | 11.58785 | 0.276413 | 9.407972 | 30.95929 | -10.963  | 41.92229 | 21.63071 |
| 3138.446 | 4.733333 | 11.16117 | 0.26968  | 9.646659 | 32.40114 | -8.98557 | 41.38671 | 23.22381 |
| 2595.113 | 3.605634 | 10.89231 | 0.249092 | 9.607472 | 29.23657 | -14.4914 | 43.728   | 18.47964 |
| 2394.186 | 4.637931 | 12.66384 | 0.288886 | 9.603697 | 29.97729 | -13.8596 | 43.83686 | 17.9426  |
| 3149.185 | 5.351852 | 12.01897 | 0.284084 | 9.509554 | 32.63986 | -9.668   | 42.30786 | 0.352786 |
| 2353.025 | 5.6      | 12.23752 | 0.286805 | 9.577015 | 29.17486 | -13.4936 | 42.66843 | 20.21343 |
| 3192.077 | 5.166667 | 10.88248 | 0.260203 | 9.39656  | 31.336   | -10.487  | 41.823   | 0.303467 |
| 2726.074 | 4.775862 | 11.58785 | 0.276413 | 9.407972 | 30.95929 | -10.963  | 41.92229 | 21.63071 |
| 2887.812 | 3.913043 | 11.84115 | 0.260928 | 9.662682 | 30.74543 | -14.6354 | 45.38086 | 19.70782 |
| 2810.948 | 5.415094 | 10.69609 | 0.250334 | 9.695685 | 30.62543 | -12.1019 | 42.72729 | 19.40664 |
| 3064.826 | 4.181818 | 12.12107 | 0.268995 | 9.801269 | 31.42757 | -13.633  | 45.06057 | 20.40975 |
| 2394.186 | 4.637931 | 12.66384 | 0.288886 | 9.603697 | 29.97729 | -13.8596 | 43.83686 | 17.9426  |
| 2243.37  | 4.301587 | 12.72776 | 0.291234 | 9.516183 | 29.492   | -14.2109 | 43.70286 | 16.04992 |
| 2848.788 | 3.820896 | 8.87108  | 0.220209 | 9.588186 | 29.448   | -10.8369 | 40.28486 | 18.12254 |

Table S2 - Anonymized database

|          |          |          |          |          |          |          |          |          |
|----------|----------|----------|----------|----------|----------|----------|----------|----------|
| 2810.948 | 5.415094 | 10.69609 | 0.250334 | 9.695685 | 30.62543 | -12.1019 | 42.72729 | 19.40664 |
| 3131.78  | 5.705882 | 11.75005 | 0.281206 | 9.412608 | 32.16186 | -9.62257 | 41.78443 | 0.459989 |
| 2887.812 | 3.913043 | 11.84115 | 0.260928 | 9.662682 | 30.74543 | -14.6354 | 45.38086 | 19.70782 |
| 2726.074 | 4.775862 | 11.58785 | 0.276413 | 9.407972 | 30.95929 | -10.963  | 41.92229 | 21.63071 |
| 2664.713 | 4.724138 | 11.60777 | 0.271668 | 9.607548 | 30.41771 | -12.3101 | 42.72786 | 21.37524 |
| 3149.185 | 5.351852 | 12.01897 | 0.284084 | 9.509554 | 32.63986 | -9.668   | 42.30786 | 0.352786 |
| 2653.503 | 3.705882 | 10.52719 | 0.252445 | 9.629148 | 28.88357 | -12.8173 | 41.70086 | 20.99415 |
| 2726.074 | 4.775862 | 11.58785 | 0.276413 | 9.407972 | 30.95929 | -10.963  | 41.92229 | 21.63071 |
| 3193.935 | 5.017544 | 12.02356 | 0.289988 | 9.423629 | 32.07857 | -9.38371 | 41.46229 | 0.690434 |
| 2726.074 | 4.775862 | 11.58785 | 0.276413 | 9.407972 | 30.95929 | -10.963  | 41.92229 | 21.63071 |
| 3483.082 | 5.557692 | 10.08862 | 0.23643  | 9.769134 | 32.43529 | -10.2354 | 42.67071 | 21.54803 |
| 2595.113 | 3.605634 | 10.89231 | 0.249092 | 9.607472 | 29.23657 | -14.4914 | 43.728   | 18.47964 |
| 3474.345 | 4.783333 | 10.37154 | 0.256744 | 9.424103 | 32.62914 | -7.76729 | 40.39643 | 21.56245 |
| 3322.52  | 5.196429 | 10.60134 | 0.26641  | 9.343971 | 32.09771 | -7.69557 | 39.79329 | 21.03012 |
| 2664.713 | 4.724138 | 11.60777 | 0.271668 | 9.607548 | 30.41771 | -12.3101 | 42.72786 | 21.37524 |
| 2848.788 | 3.820896 | 8.87108  | 0.220209 | 9.588186 | 29.448   | -10.8369 | 40.28486 | 18.12254 |
| 2810.948 | 5.415094 | 10.69609 | 0.250334 | 9.695685 | 30.62543 | -12.1019 | 42.72729 | 19.40664 |
| 2726.074 | 4.775862 | 11.58785 | 0.276413 | 9.407972 | 30.95929 | -10.963  | 41.92229 | 21.63071 |
| 3126.98  | 5.163636 | 11.74875 | 0.28127  | 9.529702 | 32.55129 | -9.21914 | 41.77043 | 0.209357 |
| 2353.025 | 5.6      | 12.23752 | 0.286805 | 9.577015 | 29.17486 | -13.4936 | 42.66843 | 20.21343 |
| 3126.98  | 5.163636 | 11.74875 | 0.28127  | 9.529702 | 32.55129 | -9.21914 | 41.77043 | 0.209357 |
| 3151.322 | 4.119403 | 11.31377 | 0.254159 | 9.756036 | 31.54671 | -12.9679 | 44.51457 | 20.11212 |
| 2677.101 | 4.677966 | 12.00808 | 0.288392 | 9.354972 | 30.54514 | -11.0929 | 41.638   | 21.38553 |
| 3300.713 | 4.965517 | 11.43246 | 0.277964 | 9.426942 | 32.93186 | -8.19743 | 41.12929 | 21.16282 |
| 3064.826 | 4.181818 | 12.12107 | 0.268995 | 9.801269 | 31.42757 | -13.633  | 45.06057 | 20.40975 |
| 3040.069 | 3.985294 | 11.61803 | 0.259429 | 9.707729 | 31.03271 | -13.7504 | 44.78314 | 20.27443 |
| 2664.713 | 4.724138 | 11.60777 | 0.271668 | 9.607548 | 30.41771 | -12.3101 | 42.72786 | 21.37524 |
| 2868.931 | 3.898551 | 13.86803 | 0.29415  | 9.617925 | 31.076   | -16.0701 | 47.14614 | 19.47848 |
| 3079.366 | 5.142857 | 11.17254 | 0.269231 | 9.602149 | 31.90286 | -9.59514 | 41.498   | -0.31046 |
| 2726.074 | 4.775862 | 11.58785 | 0.276413 | 9.407972 | 30.95929 | -10.963  | 41.92229 | 21.63071 |
| 2353.025 | 5.6      | 12.23752 | 0.286805 | 9.577015 | 29.17486 | -13.4936 | 42.66843 | 20.21343 |
| 3149.185 | 5.351852 | 12.01897 | 0.284084 | 9.509554 | 32.63986 | -9.668   | 42.30786 | 0.352786 |
| 3227.156 | 5.764706 | 11.46446 | 0.262674 | 9.709424 | 32.16843 | -11.4769 | 43.64529 | -0.05249 |
| 3192.077 | 5.166667 | 10.88248 | 0.260203 | 9.39656  | 31.336   | -10.487  | 41.823   | 0.303467 |
| 2677.101 | 4.677966 | 12.00808 | 0.288392 | 9.354972 | 30.54514 | -11.0929 | 41.638   | 21.38553 |
| 2595.113 | 3.605634 | 10.89231 | 0.249092 | 9.607472 | 29.23657 | -14.4914 | 43.728   | 18.47964 |
| 2264.267 | 5.490196 | 11.37267 | 0.270539 | 9.682687 | 28.91757 | -13.1196 | 42.03714 | 19.97095 |
| 2746.191 | 4.566667 | 11.07325 | 0.264385 | 9.51727  | 30.81386 | -11.0691 | 41.883   | 21.4006  |
| 2264.267 | 5.490196 | 11.37267 | 0.270539 | 9.682687 | 28.91757 | -13.1196 | 42.03714 | 19.97095 |
| 3155.268 | 5.538462 | 11.65081 | 0.278366 | 9.459596 | 32.31814 | -9.53614 | 41.85429 | 0.438879 |
| 2676.135 | 4.927273 | 11.26454 | 0.26263  | 8.987712 | 30.43086 | -12.4604 | 42.89129 | 18.39688 |
| 2429.035 | 4.793103 | 11.21175 | 0.26066  | 9.080668 | 29.153   | -13.8599 | 43.01286 | 17.34101 |
| 2662.339 | 3.584615 | 10.71813 | 0.259567 | 8.442961 | 27.81257 | -13.4797 | 41.29229 | 17.99148 |
| 3024.132 | 4.030769 | 10.462   | 0.243544 | 8.942156 | 30.22729 | -12.7301 | 42.95743 | 19.63534 |
| 2942.86  | 3.567164 | 10.37463 | 0.245893 | 8.69951  | 29.838   | -12.3537 | 42.19171 | 15.74591 |
| 2983.579 | 3.666667 | 10.66051 | 0.247424 | 9.000824 | 30.092   | -12.994  | 43.086   | 19.47402 |
| 2974.456 | 4.030769 | 10.95567 | 0.250968 | 8.95459  | 30.55286 | -13.1007 | 43.65357 | 19.55171 |
| 2676.135 | 4.927273 | 11.26454 | 0.26263  | 8.987712 | 30.43086 | -12.4604 | 42.89129 | 18.39688 |
| 3205.848 | 4.79661  | 9.997283 | 0.249281 | 8.916534 | 31.59814 | -8.50629 | 40.10443 | 22.22416 |
| 2676.135 | 4.927273 | 11.26454 | 0.26263  | 8.987712 | 30.43086 | -12.4604 | 42.89129 | 18.39688 |

Table S2 - Anonymized database

|          |          |          |          |          |          |          |          |          |
|----------|----------|----------|----------|----------|----------|----------|----------|----------|
| 2718.884 | 3.921875 | 8.442255 | 0.208246 | 8.998847 | 28.63929 | -11.9006 | 40.53986 | 14.11862 |
| 2799.826 | 4.542373 | 11.07159 | 0.249311 | 9.105087 | 30.57157 | -13.8371 | 44.40871 | 17.4494  |
| 2662.339 | 3.584615 | 10.71813 | 0.259567 | 8.442961 | 27.81257 | -13.4797 | 41.29229 | 17.99148 |
| 2974.456 | 4.030769 | 10.95567 | 0.250968 | 8.95459  | 30.55286 | -13.1007 | 43.65357 | 19.55171 |
| 3097.084 | 4.844828 | 10.92389 | 0.266723 | 8.862637 | 31.75329 | -9.20271 | 40.956   | 22.2623  |
| 2974.456 | 4.030769 | 10.95567 | 0.250968 | 8.95459  | 30.55286 | -13.1007 | 43.65357 | 19.55171 |
| 2799.826 | 4.542373 | 11.07159 | 0.249311 | 9.105087 | 30.57157 | -13.8371 | 44.40871 | 17.4494  |
| 2687.626 | 4.542373 | 10.94315 | 0.247359 | 9.105289 | 29.877   | -14.363  | 44.24    | 17.0018  |
| 3087.363 | 4.862069 | 10.02532 | 0.248886 | 9.004414 | 31.52586 | -8.75486 | 40.28071 | 21.9568  |
| 2676.135 | 4.927273 | 11.26454 | 0.26263  | 8.987712 | 30.43086 | -12.4604 | 42.89129 | 18.39688 |
| 2518.368 | 4.459016 | 11.51837 | 0.258096 | 9.220036 | 29.27157 | -15.3567 | 44.62829 | 17.88371 |
| 3087.363 | 4.862069 | 10.02532 | 0.248886 | 9.004414 | 31.52586 | -8.75486 | 40.28071 | 21.9568  |
| 2974.456 | 4.030769 | 10.95567 | 0.250968 | 8.95459  | 30.55286 | -13.1007 | 43.65357 | 19.55171 |
| 2429.035 | 4.793103 | 11.21175 | 0.26066  | 9.080668 | 29.153   | -13.8599 | 43.01286 | 17.34101 |
| 3113.026 | 4.793103 | 10.04865 | 0.249842 | 8.974093 | 31.278   | -8.942   | 40.22    | 21.90496 |
| 2799.826 | 4.542373 | 11.07159 | 0.249311 | 9.105087 | 30.57157 | -13.8371 | 44.40871 | 17.4494  |
| 3097.084 | 4.844828 | 10.92389 | 0.266723 | 8.862637 | 31.75329 | -9.20271 | 40.956   | 22.2623  |
| 3087.363 | 4.862069 | 10.02532 | 0.248886 | 9.004414 | 31.52586 | -8.75486 | 40.28071 | 21.9568  |
| 3087.363 | 4.862069 | 10.02532 | 0.248886 | 9.004414 | 31.52586 | -8.75486 | 40.28071 | 21.9568  |
| 2957.386 | 4.435484 | 10.50273 | 0.259459 | 8.880752 | 30.82643 | -9.65286 | 40.47929 | 21.32689 |
| 2646.493 | 4.689655 | 11.33282 | 0.264203 | 8.937867 | 30.49671 | -12.3977 | 42.89443 | 18.23403 |
| 2240.972 | 4.5      | 10.24482 | 0.238973 | 9.470442 | 27.75557 | -15.1146 | 42.87014 | 16.65014 |
| 2699.456 | 4.15873  | 11.4184  | 0.255565 | 9.0218   | 30.08986 | -14.5891 | 44.679   | 17.1172  |
| 3140.023 | 3.939394 | 10.33348 | 0.241358 | 8.912543 | 30.57343 | -12.2404 | 42.81386 | 21.6844  |
| 2799.826 | 4.542373 | 11.07159 | 0.249311 | 9.105087 | 30.57157 | -13.8371 | 44.40871 | 17.4494  |
| 2869.708 | 4.387097 | 10.01899 | 0.246341 | 8.666644 | 29.66714 | -11.0041 | 40.67129 | 19.24168 |
| 2676.135 | 4.927273 | 11.26454 | 0.26263  | 8.987712 | 30.43086 | -12.4604 | 42.89129 | 18.39688 |
| 2661.64  | 4.655172 | 10.23391 | 0.241802 | 9.129539 | 29.50586 | -12.8177 | 42.32357 | 10.81254 |
| 3186.837 | 4.896552 | 9.49847  | 0.242855 | 8.842822 | 31.02329 | -8.08843 | 39.11171 | 22.09674 |
| 2957.386 | 4.435484 | 10.50273 | 0.259459 | 8.880752 | 30.82643 | -9.65286 | 40.47929 | 21.32689 |
| 2240.972 | 4.5      | 10.24482 | 0.238973 | 9.470442 | 27.75557 | -15.1146 | 42.87014 | 16.65014 |
| 2662.339 | 3.584615 | 10.71813 | 0.259567 | 8.442961 | 27.81257 | -13.4797 | 41.29229 | 17.99148 |
| 3097.084 | 4.844828 | 10.92389 | 0.266723 | 8.862637 | 31.75329 | -9.20271 | 40.956   | 22.2623  |
| 2799.826 | 4.542373 | 11.07159 | 0.249311 | 9.105087 | 30.57157 | -13.8371 | 44.40871 | 17.4494  |
| 3097.084 | 4.844828 | 10.92389 | 0.266723 | 8.862637 | 31.75329 | -9.20271 | 40.956   | 22.2623  |
| 3040.462 | 4.864407 | 10.83357 | 0.264768 | 8.930403 | 31.33086 | -9.58643 | 40.91729 | 21.62754 |
| 2798.628 | 4.55     | 10.7441  | 0.257734 | 8.935147 | 30.38557 | -11.3011 | 41.68671 | 20.63604 |
| 2661.64  | 4.655172 | 10.23391 | 0.241802 | 9.129539 | 29.50586 | -12.8177 | 42.32357 | 10.81254 |
| 2807.883 | 4.190476 | 10.83214 | 0.246376 | 9.035814 | 29.79829 | -14.1676 | 43.96586 | 15.21182 |
| 3097.084 | 4.844828 | 10.92389 | 0.266723 | 8.862637 | 31.75329 | -9.20271 | 40.956   | 22.2623  |
| 2974.456 | 4.030769 | 10.95567 | 0.250968 | 8.95459  | 30.55286 | -13.1007 | 43.65357 | 19.55171 |
| 3161.85  | 4.779661 | 10.63573 | 0.262117 | 8.883855 | 31.75043 | -8.82586 | 40.57629 | 22.06796 |
| 3040.462 | 4.864407 | 10.83357 | 0.264768 | 8.930403 | 31.33086 | -9.58643 | 40.91729 | 21.62754 |
| 3097.084 | 4.844828 | 10.92389 | 0.266723 | 8.862637 | 31.75329 | -9.20271 | 40.956   | 22.2623  |
| 3087.363 | 4.862069 | 10.02532 | 0.248886 | 9.004414 | 31.52586 | -8.75486 | 40.28071 | 21.9568  |
| 2687.626 | 4.542373 | 10.94315 | 0.247359 | 9.105289 | 29.877   | -14.363  | 44.24    | 17.0018  |
| 3087.363 | 4.862069 | 10.02532 | 0.248886 | 9.004414 | 31.52586 | -8.75486 | 40.28071 | 21.9568  |
| 3118.855 | 4.046875 | 10.26652 | 0.241974 | 8.910968 | 30.34643 | -12.0817 | 42.42814 | 21.63227 |
| 2798.628 | 4.55     | 10.7441  | 0.257734 | 8.935147 | 30.38557 | -11.3011 | 41.68671 | 20.63604 |
| 2662.339 | 3.584615 | 10.71813 | 0.259567 | 8.442961 | 27.81257 | -13.4797 | 41.29229 | 17.99148 |

Table S2 - Anonymized database

|          |          |          |          |          |          |          |          |          |
|----------|----------|----------|----------|----------|----------|----------|----------|----------|
| 3205.848 | 4.79661  | 9.997283 | 0.249281 | 8.916534 | 31.59814 | -8.50629 | 40.10443 | 22.22416 |
| 3161.85  | 4.779661 | 10.63573 | 0.262117 | 8.883855 | 31.75043 | -8.82586 | 40.57629 | 22.06796 |
| 2999.858 | 4.16129  | 10.43253 | 0.242742 | 8.842099 | 29.89586 | -13.082  | 42.97786 | 19.40637 |
| 3097.084 | 4.844828 | 10.92389 | 0.266723 | 8.862637 | 31.75329 | -9.20271 | 40.956   | 22.2623  |
| 2240.972 | 4.5      | 10.24482 | 0.238973 | 9.470442 | 27.75557 | -15.1146 | 42.87014 | 16.65014 |
| 3077.479 | 4.516129 | 10.7899  | 0.264113 | 8.651458 | 31.12286 | -9.73043 | 40.85329 | 21.44169 |
| 2974.456 | 4.030769 | 10.95567 | 0.250968 | 8.95459  | 30.55286 | -13.1007 | 43.65357 | 19.55171 |
| 2829.6   | 3.555556 | 11.10361 | 0.256655 | 8.846986 | 30.21014 | -13.0526 | 43.26271 | 18.90434 |
| 2999.858 | 4.16129  | 10.43253 | 0.242742 | 8.842099 | 29.89586 | -13.082  | 42.97786 | 19.40637 |
| 3087.363 | 4.862069 | 10.02532 | 0.248886 | 9.004414 | 31.52586 | -8.75486 | 40.28071 | 21.9568  |
| 2799.826 | 4.542373 | 11.07159 | 0.249311 | 9.105087 | 30.57157 | -13.8371 | 44.40871 | 17.4494  |
| 3118.855 | 4.046875 | 10.26652 | 0.241974 | 8.910968 | 30.34643 | -12.0817 | 42.42814 | 21.63227 |
| 2718.884 | 3.921875 | 8.442255 | 0.208246 | 8.998847 | 28.63929 | -11.9006 | 40.53986 | 14.11862 |
| 2662.542 | 4.344262 | 11.35504 | 0.253968 | 9.015101 | 30.02743 | -14.683  | 44.71043 | 16.94557 |
| 3176.007 | 4.982456 | 10.08337 | 0.250595 | 8.931754 | 31.66286 | -8.57486 | 40.23771 | 22.02507 |
| 2240.972 | 4.5      | 10.24482 | 0.238973 | 9.470442 | 27.75557 | -15.1146 | 42.87014 | 16.65014 |
| 2932.246 | 4.689655 | 11.01525 | 0.262471 | 8.700931 | 30.75229 | -11.2153 | 41.96757 | 21.1399  |
| 2240.972 | 4.5      | 10.24482 | 0.238973 | 9.470442 | 27.75557 | -15.1146 | 42.87014 | 16.65014 |
| 2989.158 | 4.442623 | 10.31513 | 0.252065 | 8.9269   | 30.95129 | -9.97129 | 40.92257 | 21.3243  |
| 3024.132 | 4.030769 | 10.462   | 0.243544 | 8.942156 | 30.22729 | -12.7301 | 42.95743 | 19.63534 |
| 2957.386 | 4.435484 | 10.50273 | 0.259459 | 8.880752 | 30.82643 | -9.65286 | 40.47929 | 21.32689 |
| 2953.894 | 3.642857 | 11.23202 | 0.258294 | 8.934624 | 30.589   | -12.8964 | 43.48543 | 19.47527 |
| 2967.535 | 3.779412 | 10.5232  | 0.244535 | 9.00546  | 29.92871 | -13.1049 | 43.03357 | 19.39375 |
| 2498.522 | 4.533333 | 10.88513 | 0.254832 | 8.928289 | 29.48414 | -13.2309 | 42.715   | 19.13995 |
| 3087.363 | 4.862069 | 10.02532 | 0.248886 | 9.004414 | 31.52586 | -8.75486 | 40.28071 | 21.9568  |
| 2989.158 | 4.442623 | 10.31513 | 0.252065 | 8.9269   | 30.95129 | -9.97129 | 40.92257 | 21.3243  |
| 2957.386 | 4.435484 | 10.50273 | 0.259459 | 8.880752 | 30.82643 | -9.65286 | 40.47929 | 21.32689 |
| 2662.339 | 3.584615 | 10.71813 | 0.259567 | 8.442961 | 27.81257 | -13.4797 | 41.29229 | 17.99148 |
| 3097.084 | 4.844828 | 10.92389 | 0.266723 | 8.862637 | 31.75329 | -9.20271 | 40.956   | 22.2623  |
| 2974.456 | 4.030769 | 10.95567 | 0.250968 | 8.95459  | 30.55286 | -13.1007 | 43.65357 | 19.55171 |
| 3077.569 | 4.5      | 10.78333 | 0.264992 | 8.648788 | 31.03186 | -9.66114 | 40.693   | 21.40941 |
| 2798.628 | 4.55     | 10.7441  | 0.257734 | 8.935147 | 30.38557 | -11.3011 | 41.68671 | 20.63604 |
| 3077.479 | 4.516129 | 10.7899  | 0.264113 | 8.651458 | 31.12286 | -9.73043 | 40.85329 | 21.44169 |
| 2418.186 | 5.074074 | 10.82791 | 0.252969 | 9.258108 | 28.88971 | -13.9136 | 42.80329 | 9.588137 |
| 3040.462 | 4.864407 | 10.83357 | 0.264768 | 8.930403 | 31.33086 | -9.58643 | 40.91729 | 21.62754 |
| 3077.479 | 4.516129 | 10.7899  | 0.264113 | 8.651458 | 31.12286 | -9.73043 | 40.85329 | 21.44169 |
| 2967.535 | 3.779412 | 10.5232  | 0.244535 | 9.00546  | 29.92871 | -13.1049 | 43.03357 | 19.39375 |
| 3077.479 | 4.516129 | 10.7899  | 0.264113 | 8.651458 | 31.12286 | -9.73043 | 40.85329 | 21.44169 |
| 3087.363 | 4.862069 | 10.02532 | 0.248886 | 9.004414 | 31.52586 | -8.75486 | 40.28071 | 21.9568  |
| 2676.135 | 4.927273 | 11.26454 | 0.26263  | 8.987712 | 30.43086 | -12.4604 | 42.89129 | 18.39688 |
| 2676.135 | 4.927273 | 11.26454 | 0.26263  | 8.987712 | 30.43086 | -12.4604 | 42.89129 | 18.39688 |
| 2676.135 | 4.927273 | 11.26454 | 0.26263  | 8.987712 | 30.43086 | -12.4604 | 42.89129 | 18.39688 |
| 2240.972 | 4.5      | 10.24482 | 0.238973 | 9.470442 | 27.75557 | -15.1146 | 42.87014 | 16.65014 |
| 2662.339 | 3.584615 | 10.71813 | 0.259567 | 8.442961 | 27.81257 | -13.4797 | 41.29229 | 17.99148 |
| 2959.483 | 4.745763 | 10.91957 | 0.268321 | 8.862077 | 31.116   | -9.58    | 40.696   | 21.3915  |
| 3087.363 | 4.862069 | 10.02532 | 0.248886 | 9.004414 | 31.52586 | -8.75486 | 40.28071 | 21.9568  |
| 3205.848 | 4.79661  | 9.997283 | 0.249281 | 8.916534 | 31.59814 | -8.50629 | 40.10443 | 22.22416 |
| 3140.023 | 3.939394 | 10.33348 | 0.241358 | 8.912543 | 30.57343 | -12.2404 | 42.81386 | 21.6844  |
| 2974.456 | 4.030769 | 10.95567 | 0.250968 | 8.95459  | 30.55286 | -13.1007 | 43.65357 | 19.55171 |
| 2661.64  | 4.655172 | 10.23391 | 0.241802 | 9.129539 | 29.50586 | -12.8177 | 42.32357 | 10.81254 |



Table S2 - Anonymized database

|          |          |          |          |          |          |          |          |          |
|----------|----------|----------|----------|----------|----------|----------|----------|----------|
| 3087.363 | 4.862069 | 10.02532 | 0.248886 | 9.004414 | 31.52586 | -8.75486 | 40.28071 | 21.9568  |
| 2662.339 | 3.584615 | 10.71813 | 0.259567 | 8.442961 | 27.81257 | -13.4797 | 41.29229 | 17.99148 |
| 3087.363 | 4.862069 | 10.02532 | 0.248886 | 9.004414 | 31.52586 | -8.75486 | 40.28071 | 21.9568  |
| 2999.858 | 4.16129  | 10.43253 | 0.242742 | 8.842099 | 29.89586 | -13.082  | 42.97786 | 19.40637 |
| 3077.479 | 4.516129 | 10.7899  | 0.264113 | 8.651458 | 31.12286 | -9.73043 | 40.85329 | 21.44169 |
| 2967.535 | 3.779412 | 10.5232  | 0.244535 | 9.00546  | 29.92871 | -13.1049 | 43.03357 | 19.39375 |
| 3111.843 | 4.847458 | 11.07463 | 0.276246 | 8.774996 | 31.43486 | -8.65486 | 40.08971 | 22.16168 |
| 2718.884 | 3.921875 | 8.442255 | 0.208246 | 8.998847 | 28.63929 | -11.9006 | 40.53986 | 14.11862 |
| 2718.884 | 3.921875 | 8.442255 | 0.208246 | 8.998847 | 28.63929 | -11.9006 | 40.53986 | 14.11862 |
| 2967.535 | 3.779412 | 10.5232  | 0.244535 | 9.00546  | 29.92871 | -13.1049 | 43.03357 | 19.39375 |
| 2676.135 | 4.927273 | 11.26454 | 0.26263  | 8.987712 | 30.43086 | -12.4604 | 42.89129 | 18.39688 |
| 3146.548 | 3.910448 | 10.54269 | 0.246233 | 8.918875 | 30.84171 | -11.9743 | 42.816   | 20.15043 |
| 2798.628 | 4.55     | 10.7441  | 0.257734 | 8.935147 | 30.38557 | -11.3011 | 41.68671 | 20.63604 |
| 2661.64  | 4.655172 | 10.23391 | 0.241802 | 9.129539 | 29.50586 | -12.8177 | 42.32357 | 10.81254 |
| 2357.397 | 3.742424 | 10.59493 | 0.248061 | 8.643704 | 27.30029 | -15.4107 | 42.711   | 16.92964 |
| 3087.363 | 4.862069 | 10.02532 | 0.248886 | 9.004414 | 31.52586 | -8.75486 | 40.28071 | 21.9568  |
| 2974.456 | 4.030769 | 10.95567 | 0.250968 | 8.95459  | 30.55286 | -13.1007 | 43.65357 | 19.55171 |
| 2933.048 | 4.349206 | 10.49677 | 0.259555 | 8.92375  | 30.85714 | -9.58429 | 40.44143 | 21.28388 |
| 2799.826 | 4.542373 | 11.07159 | 0.249311 | 9.105087 | 30.57157 | -13.8371 | 44.40871 | 17.4494  |
| 2957.386 | 4.435484 | 10.50273 | 0.259459 | 8.880752 | 30.82643 | -9.65286 | 40.47929 | 21.32689 |
| 2676.135 | 4.927273 | 11.26454 | 0.26263  | 8.987712 | 30.43086 | -12.4604 | 42.89129 | 18.39688 |
| 3097.084 | 4.844828 | 10.92389 | 0.266723 | 8.862637 | 31.75329 | -9.20271 | 40.956   | 22.2623  |
| 2953.894 | 3.642857 | 11.23202 | 0.258294 | 8.934624 | 30.589   | -12.8964 | 43.48543 | 19.47527 |
| 3097.084 | 4.844828 | 10.92389 | 0.266723 | 8.862637 | 31.75329 | -9.20271 | 40.956   | 22.2623  |
| 3118.855 | 4.046875 | 10.26652 | 0.241974 | 8.910968 | 30.34643 | -12.0817 | 42.42814 | 21.63227 |
| 2687.626 | 4.542373 | 10.94315 | 0.247359 | 9.105289 | 29.877   | -14.363  | 44.24    | 17.0018  |
| 3087.363 | 4.862069 | 10.02532 | 0.248886 | 9.004414 | 31.52586 | -8.75486 | 40.28071 | 21.9568  |
| 3040.462 | 4.864407 | 10.83357 | 0.264768 | 8.930403 | 31.33086 | -9.58643 | 40.91729 | 21.62754 |
| 3097.084 | 4.844828 | 10.92389 | 0.266723 | 8.862637 | 31.75329 | -9.20271 | 40.956   | 22.2623  |
| 2967.535 | 3.779412 | 10.5232  | 0.244535 | 9.00546  | 29.92871 | -13.1049 | 43.03357 | 19.39375 |
| 2676.135 | 4.927273 | 11.26454 | 0.26263  | 8.987712 | 30.43086 | -12.4604 | 42.89129 | 18.39688 |
| 2942.86  | 3.567164 | 10.37463 | 0.245893 | 8.69951  | 29.838   | -12.3537 | 42.19171 | 15.74591 |
| 3097.084 | 4.844828 | 10.92389 | 0.266723 | 8.862637 | 31.75329 | -9.20271 | 40.956   | 22.2623  |
| 3087.363 | 4.862069 | 10.02532 | 0.248886 | 9.004414 | 31.52586 | -8.75486 | 40.28071 | 21.9568  |
| 3087.363 | 4.862069 | 10.02532 | 0.248886 | 9.004414 | 31.52586 | -8.75486 | 40.28071 | 21.9568  |
| 2418.186 | 5.074074 | 10.82791 | 0.252969 | 9.258108 | 28.88971 | -13.9136 | 42.80329 | 9.588137 |
| 2240.972 | 4.5      | 10.24482 | 0.238973 | 9.470442 | 27.75557 | -15.1146 | 42.87014 | 16.65014 |
| 3087.363 | 4.862069 | 10.02532 | 0.248886 | 9.004414 | 31.52586 | -8.75486 | 40.28071 | 21.9568  |
| 2669.999 | 4.174603 | 11.01735 | 0.247661 | 9.074549 | 29.75129 | -14.7344 | 44.48571 | 17.00764 |
| 3097.084 | 4.844828 | 10.92389 | 0.266723 | 8.862637 | 31.75329 | -9.20271 | 40.956   | 22.2623  |
| 3085.205 | 4.7      | 10.54885 | 0.261208 | 8.905989 | 31.41229 | -8.97257 | 40.38486 | 21.88501 |
| 2957.386 | 4.435484 | 10.50273 | 0.259459 | 8.880752 | 30.82643 | -9.65286 | 40.47929 | 21.32689 |
| 2957.386 | 4.435484 | 10.50273 | 0.259459 | 8.880752 | 30.82643 | -9.65286 | 40.47929 | 21.32689 |
| 2662.339 | 3.584615 | 10.71813 | 0.259567 | 8.442961 | 27.81257 | -13.4797 | 41.29229 | 17.99148 |
| 3087.363 | 4.862069 | 10.02532 | 0.248886 | 9.004414 | 31.52586 | -8.75486 | 40.28071 | 21.9568  |
| 2662.339 | 3.584615 | 10.71813 | 0.259567 | 8.442961 | 27.81257 | -13.4797 | 41.29229 | 17.99148 |
| 2967.535 | 3.779412 | 10.5232  | 0.244535 | 9.00546  | 29.92871 | -13.1049 | 43.03357 | 19.39375 |
| 2829.6   | 3.555556 | 11.10361 | 0.256655 | 8.846986 | 30.21014 | -13.0526 | 43.26271 | 18.90434 |
| 2662.339 | 3.584615 | 10.71813 | 0.259567 | 8.442961 | 27.81257 | -13.4797 | 41.29229 | 17.99148 |
| 3087.363 | 4.862069 | 10.02532 | 0.248886 | 9.004414 | 31.52586 | -8.75486 | 40.28071 | 21.9568  |

Table S2 - Anonymized database

|          |          |          |          |          |          |          |          |          |
|----------|----------|----------|----------|----------|----------|----------|----------|----------|
| 3097.084 | 4.844828 | 10.92389 | 0.266723 | 8.862637 | 31.75329 | -9.20271 | 40.956   | 22.2623  |
| 2967.535 | 3.779412 | 10.5232  | 0.244535 | 9.00546  | 29.92871 | -13.1049 | 43.03357 | 19.39375 |
| 3146.548 | 3.910448 | 10.54269 | 0.246233 | 8.918875 | 30.84171 | -11.9743 | 42.816   | 20.15043 |
| 2661.64  | 4.655172 | 10.23391 | 0.241802 | 9.129539 | 29.50586 | -12.8177 | 42.32357 | 10.81254 |
| 3097.084 | 4.844828 | 10.92389 | 0.266723 | 8.862637 | 31.75329 | -9.20271 | 40.956   | 22.2623  |
| 3097.084 | 4.844828 | 10.92389 | 0.266723 | 8.862637 | 31.75329 | -9.20271 | 40.956   | 22.2623  |
| 2807.883 | 4.190476 | 10.83214 | 0.246376 | 9.035814 | 29.79829 | -14.1676 | 43.96586 | 15.21182 |
| 2999.858 | 4.16129  | 10.43253 | 0.242742 | 8.842099 | 29.89586 | -13.082  | 42.97786 | 19.40637 |
| 2798.628 | 4.55     | 10.7441  | 0.257734 | 8.935147 | 30.38557 | -11.3011 | 41.68671 | 20.63604 |
| 3146.548 | 3.910448 | 10.54269 | 0.246233 | 8.918875 | 30.84171 | -11.9743 | 42.816   | 20.15043 |
| 3077.479 | 4.516129 | 10.7899  | 0.264113 | 8.651458 | 31.12286 | -9.73043 | 40.85329 | 21.44169 |
| 2957.386 | 4.435484 | 10.50273 | 0.259459 | 8.880752 | 30.82643 | -9.65286 | 40.47929 | 21.32689 |
| 2570.41  | 4.095238 | 10.31579 | 0.235489 | 9.217671 | 29.51943 | -14.2864 | 43.80586 | 16.54059 |
| 3024.132 | 4.030769 | 10.462   | 0.243544 | 8.942156 | 30.22729 | -12.7301 | 42.95743 | 19.63534 |
| 3040.462 | 4.864407 | 10.83357 | 0.264768 | 8.930403 | 31.33086 | -9.58643 | 40.91729 | 21.62754 |
| 2518.368 | 4.459016 | 11.51837 | 0.258096 | 9.220036 | 29.27157 | -15.3567 | 44.62829 | 17.88371 |
| 2699.456 | 4.15873  | 11.4184  | 0.255565 | 9.0218   | 30.08986 | -14.5891 | 44.679   | 17.1172  |
| 2942.86  | 3.567164 | 10.37463 | 0.245893 | 8.69951  | 29.838   | -12.3537 | 42.19171 | 15.74591 |
| 3097.084 | 4.844828 | 10.92389 | 0.266723 | 8.862637 | 31.75329 | -9.20271 | 40.956   | 22.2623  |
| 2953.704 | 3.619718 | 10.85687 | 0.250288 | 8.957851 | 30.26029 | -13.1173 | 43.37757 | 19.42741 |
| 2807.883 | 4.190476 | 10.83214 | 0.246376 | 9.035814 | 29.79829 | -14.1676 | 43.96586 | 15.21182 |
| 2953.894 | 3.642857 | 11.23202 | 0.258294 | 8.934624 | 30.589   | -12.8964 | 43.48543 | 19.47527 |
| 2718.884 | 3.921875 | 8.442255 | 0.208246 | 8.998847 | 28.63929 | -11.9006 | 40.53986 | 14.11862 |
| 3097.084 | 4.844828 | 10.92389 | 0.266723 | 8.862637 | 31.75329 | -9.20271 | 40.956   | 22.2623  |
| 2676.135 | 4.927273 | 11.26454 | 0.26263  | 8.987712 | 30.43086 | -12.4604 | 42.89129 | 18.39688 |
| 2669.999 | 4.174603 | 11.01735 | 0.247661 | 9.074549 | 29.75129 | -14.7344 | 44.48571 | 17.00764 |
| 3118.855 | 4.046875 | 10.26652 | 0.241974 | 8.910968 | 30.34643 | -12.0817 | 42.42814 | 21.63227 |
| 3077.479 | 4.516129 | 10.7899  | 0.264113 | 8.651458 | 31.12286 | -9.73043 | 40.85329 | 21.44169 |
| 2957.386 | 4.435484 | 10.50273 | 0.259459 | 8.880752 | 30.82643 | -9.65286 | 40.47929 | 21.32689 |
| 2807.883 | 4.190476 | 10.83214 | 0.246376 | 9.035814 | 29.79829 | -14.1676 | 43.96586 | 15.21182 |
| 2807.883 | 4.190476 | 10.83214 | 0.246376 | 9.035814 | 29.79829 | -14.1676 | 43.96586 | 15.21182 |
| 2798.628 | 4.55     | 10.7441  | 0.257734 | 8.935147 | 30.38557 | -11.3011 | 41.68671 | 20.63604 |
| 2967.535 | 3.779412 | 10.5232  | 0.244535 | 9.00546  | 29.92871 | -13.1049 | 43.03357 | 19.39375 |
| 2676.135 | 4.927273 | 11.26454 | 0.26263  | 8.987712 | 30.43086 | -12.4604 | 42.89129 | 18.39688 |
| 2699.456 | 4.15873  | 11.4184  | 0.255565 | 9.0218   | 30.08986 | -14.5891 | 44.679   | 17.1172  |
| 3087.363 | 4.862069 | 10.02532 | 0.248886 | 9.004414 | 31.52586 | -8.75486 | 40.28071 | 21.9568  |
| 2974.456 | 4.030769 | 10.95567 | 0.250968 | 8.95459  | 30.55286 | -13.1007 | 43.65357 | 19.55171 |
| 2799.826 | 4.542373 | 11.07159 | 0.249311 | 9.105087 | 30.57157 | -13.8371 | 44.40871 | 17.4494  |
| 2807.883 | 4.190476 | 10.83214 | 0.246376 | 9.035814 | 29.79829 | -14.1676 | 43.96586 | 15.21182 |
| 3077.479 | 4.516129 | 10.7899  | 0.264113 | 8.651458 | 31.12286 | -9.73043 | 40.85329 | 21.44169 |
| 3040.462 | 4.864407 | 10.83357 | 0.264768 | 8.930403 | 31.33086 | -9.58643 | 40.91729 | 21.62754 |
| 3087.363 | 4.862069 | 10.02532 | 0.248886 | 9.004414 | 31.52586 | -8.75486 | 40.28071 | 21.9568  |
| 2942.86  | 3.567164 | 10.37463 | 0.245893 | 8.69951  | 29.838   | -12.3537 | 42.19171 | 15.74591 |
| 2676.135 | 4.927273 | 11.26454 | 0.26263  | 8.987712 | 30.43086 | -12.4604 | 42.89129 | 18.39688 |
| 2687.626 | 4.542373 | 10.94315 | 0.247359 | 9.105289 | 29.877   | -14.363  | 44.24    | 17.0018  |
| 3087.363 | 4.862069 | 10.02532 | 0.248886 | 9.004414 | 31.52586 | -8.75486 | 40.28071 | 21.9568  |
| 2676.135 | 4.927273 | 11.26454 | 0.26263  | 8.987712 | 30.43086 | -12.4604 | 42.89129 | 18.39688 |
| 3097.084 | 4.844828 | 10.92389 | 0.266723 | 8.862637 | 31.75329 | -9.20271 | 40.956   | 22.2623  |
| 2676.135 | 4.927273 | 11.26454 | 0.26263  | 8.987712 | 30.43086 | -12.4604 | 42.89129 | 18.39688 |
| 2676.135 | 4.927273 | 11.26454 | 0.26263  | 8.987712 | 30.43086 | -12.4604 | 42.89129 | 18.39688 |

Table S2 - Anonymized database

|          |          |          |          |          |          |          |          |          |
|----------|----------|----------|----------|----------|----------|----------|----------|----------|
| 3024.132 | 4.030769 | 10.462   | 0.243544 | 8.942156 | 30.22729 | -12.7301 | 42.95743 | 19.63534 |
| 2799.826 | 4.542373 | 11.07159 | 0.249311 | 9.105087 | 30.57157 | -13.8371 | 44.40871 | 17.4494  |
| 2662.339 | 3.584615 | 10.71813 | 0.259567 | 8.442961 | 27.81257 | -13.4797 | 41.29229 | 17.99148 |
| 2798.628 | 4.55     | 10.7441  | 0.257734 | 8.935147 | 30.38557 | -11.3011 | 41.68671 | 20.63604 |
| 3077.479 | 4.516129 | 10.7899  | 0.264113 | 8.651458 | 31.12286 | -9.73043 | 40.85329 | 21.44169 |
| 3087.363 | 4.862069 | 10.02532 | 0.248886 | 9.004414 | 31.52586 | -8.75486 | 40.28071 | 21.9568  |
| 2429.035 | 4.793103 | 11.21175 | 0.26066  | 9.080668 | 29.153   | -13.8599 | 43.01286 | 17.34101 |
| 3024.132 | 4.030769 | 10.462   | 0.243544 | 8.942156 | 30.22729 | -12.7301 | 42.95743 | 19.63534 |
| 2799.826 | 4.542373 | 11.07159 | 0.249311 | 9.105087 | 30.57157 | -13.8371 | 44.40871 | 17.4494  |
| 3159.857 | 4.419355 | 10.32602 | 0.255375 | 8.661225 | 31.25843 | -9.17629 | 40.43471 | 21.77787 |
| 3173.256 | 4.862069 | 10.46421 | 0.257957 | 8.889374 | 31.798   | -8.76771 | 40.56571 | 22.57521 |
| 3087.363 | 4.862069 | 10.02532 | 0.248886 | 9.004414 | 31.52586 | -8.75486 | 40.28071 | 21.9568  |
| 2676.135 | 4.927273 | 11.26454 | 0.26263  | 8.987712 | 30.43086 | -12.4604 | 42.89129 | 18.39688 |
| 2662.339 | 3.584615 | 10.71813 | 0.259567 | 8.442961 | 27.81257 | -13.4797 | 41.29229 | 17.99148 |
| 3038.727 | 4.728814 | 9.828841 | 0.247999 | 8.850262 | 30.594   | -9.03857 | 39.63257 | 21.49053 |
| 3097.084 | 4.844828 | 10.92389 | 0.266723 | 8.862637 | 31.75329 | -9.20271 | 40.956   | 22.2623  |
| 2799.826 | 4.542373 | 11.07159 | 0.249311 | 9.105087 | 30.57157 | -13.8371 | 44.40871 | 17.4494  |
| 3097.084 | 4.844828 | 10.92389 | 0.266723 | 8.862637 | 31.75329 | -9.20271 | 40.956   | 22.2623  |
| 3077.479 | 4.516129 | 10.7899  | 0.264113 | 8.651458 | 31.12286 | -9.73043 | 40.85329 | 21.44169 |
| 2676.135 | 4.927273 | 11.26454 | 0.26263  | 8.987712 | 30.43086 | -12.4604 | 42.89129 | 18.39688 |
| 2676.135 | 4.927273 | 11.26454 | 0.26263  | 8.987712 | 30.43086 | -12.4604 | 42.89129 | 18.39688 |
| 3097.084 | 4.844828 | 10.92389 | 0.266723 | 8.862637 | 31.75329 | -9.20271 | 40.956   | 22.2623  |
| 2957.386 | 4.435484 | 10.50273 | 0.259459 | 8.880752 | 30.82643 | -9.65286 | 40.47929 | 21.32689 |
| 2957.386 | 4.435484 | 10.50273 | 0.259459 | 8.880752 | 30.82643 | -9.65286 | 40.47929 | 21.32689 |
| 2953.704 | 3.619718 | 10.85687 | 0.250288 | 8.957851 | 30.26029 | -13.1173 | 43.37757 | 19.42741 |
| 2807.883 | 4.190476 | 10.83214 | 0.246376 | 9.035814 | 29.79829 | -14.1676 | 43.96586 | 15.21182 |
| 3097.084 | 4.844828 | 10.92389 | 0.266723 | 8.862637 | 31.75329 | -9.20271 | 40.956   | 22.2623  |
| 2661.64  | 4.655172 | 10.23391 | 0.241802 | 9.129539 | 29.50586 | -12.8177 | 42.32357 | 10.81254 |
| 3077.479 | 4.516129 | 10.7899  | 0.264113 | 8.651458 | 31.12286 | -9.73043 | 40.85329 | 21.44169 |
| 2687.626 | 4.542373 | 10.94315 | 0.247359 | 9.105289 | 29.877   | -14.363  | 44.24    | 17.0018  |
| 3146.548 | 3.910448 | 10.54269 | 0.246233 | 8.918875 | 30.84171 | -11.9743 | 42.816   | 20.15043 |
| 2699.456 | 4.15873  | 11.4184  | 0.255565 | 9.0218   | 30.08986 | -14.5891 | 44.679   | 17.1172  |
| 2718.884 | 3.921875 | 8.442255 | 0.208246 | 8.998847 | 28.63929 | -11.9006 | 40.53986 | 14.11862 |
| 3024.132 | 4.030769 | 10.462   | 0.243544 | 8.942156 | 30.22729 | -12.7301 | 42.95743 | 19.63534 |
| 2661.64  | 4.655172 | 10.23391 | 0.241802 | 9.129539 | 29.50586 | -12.8177 | 42.32357 | 10.81254 |
| 3143.601 | 3.848485 | 9.72933  | 0.204933 | 9.861557 | 32.02443 | -15.4513 | 47.47571 | 23.28599 |
| 2513.247 | 3.088608 | 9.5855   | 0.203461 | 10.44502 | 28.597   | -18.5153 | 47.11229 | 13.03295 |
| 3049.273 | 4.063492 | 9.502195 | 0.20322  | 9.824579 | 31.45443 | -15.3037 | 46.75814 | 21.94865 |
| 2833.384 | 3.666667 | 10.54802 | 0.218217 | 10.18309 | 31.266   | -17.0713 | 48.33729 | 21.86225 |
| 2955.56  | 4.147541 | 9.553184 | 0.195655 | 10.03982 | 31.40329 | -17.4234 | 48.82671 | 21.63962 |
| 2645.201 | 3.569444 | 10.45767 | 0.208788 | 10.33064 | 29.44329 | -20.6443 | 50.08757 | 13.41331 |
| 3079.435 | 3.342466 | 9.668865 | 0.194996 | 10.36921 | 31.41586 | -18.1691 | 49.585   | 23.25553 |
| 2703.508 | 3.637681 | 10.27859 | 0.206883 | 10.33822 | 30.76129 | -18.9217 | 49.683   | 20.56579 |
| 3124.07  | 3.848485 | 9.289995 | 0.197856 | 9.90706  | 31.66843 | -15.2849 | 46.95329 | 22.29269 |
| 2971.976 | 3.507042 | 9.839538 | 0.196129 | 10.30251 | 30.57086 | -19.5979 | 50.16871 | 11.47576 |
| 2729.098 | 3.833333 | 10.26425 | 0.20757  | 10.15239 | 31.23957 | -18.2101 | 49.44971 | 20.62871 |
| 2334.449 | 3.444444 | 9.741253 | 0.198649 | 10.44967 | 28.95714 | -20.0804 | 49.03757 | 20.41729 |
| 2818.002 | 3.118421 | 10.37036 | 0.198005 | 10.45229 | 30.28257 | -22.0917 | 52.37429 | 22.04617 |
| 2923.503 | 3.148649 | 10.07393 | 0.197836 | 10.34481 | 30.52557 | -20.395  | 50.92057 | 22.45725 |
| 2816.375 | 4.225806 | 10.11058 | 0.201421 | 10.25443 | 31.65743 | -18.5389 | 50.19629 | 21.09371 |

Table S2 - Anonymized database

|          |          |          |          |          |          |          |          |          |
|----------|----------|----------|----------|----------|----------|----------|----------|----------|
| 3355.584 | 3.823529 | 8.960777 | 0.194525 | 9.82302  | 32.09971 | -13.9653 | 46.065   | 23.33846 |
| 2720.62  | 3.924242 | 9.211519 | 0.193151 | 10.20257 | 30.18943 | -17.5013 | 47.69071 | 20.48316 |
| 3066.458 | 4.095238 | 10.02045 | 0.20307  | 10.07719 | 31.792   | -17.5527 | 49.34471 | 22.81733 |
| 3039.765 | 4.16129  | 9.341959 | 0.20026  | 9.829737 | 31.31429 | -15.3349 | 46.64914 | 21.90146 |
| 2955.821 | 4.140625 | 9.83131  | 0.204391 | 9.894741 | 31.40057 | -16.6999 | 48.10043 | 21.73634 |
| 2832.254 | 3.757576 | 10.66365 | 0.212504 | 10.19024 | 32.00971 | -18.1711 | 50.18086 | 21.19691 |
| 2997.424 | 3.865672 | 9.59628  | 0.200211 | 9.834272 | 31.40686 | -16.524  | 47.93086 | 21.7804  |
| 3043.4   | 4.666667 | 8.338459 | 0.183626 | 9.777416 | 30.71686 | -14.6931 | 45.41    | 21.82645 |
| 3088.452 | 4.095238 | 9.72039  | 0.204079 | 9.84008  | 31.868   | -15.7624 | 47.63043 | 23.05503 |
| 2969.13  | 3.876923 | 9.648569 | 0.198923 | 10.03029 | 31.83686 | -16.6673 | 48.50414 | 21.68879 |
| 2560.472 | 3.720588 | 8.935824 | 0.184992 | 10.23391 | 28.98629 | -19.3176 | 48.30386 | 19.71297 |
| 2922.614 | 3.236111 | 10.04527 | 0.198393 | 10.28965 | 30.32329 | -20.31   | 50.63329 | 21.06594 |
| 2206.389 | 3.434211 | 9.759786 | 0.202076 | 10.26453 | 27.81157 | -20.4861 | 48.29771 | 18.98945 |
| 3088.305 | 4.35     | 9.927816 | 0.204093 | 10.03794 | 32.08886 | -16.5547 | 48.64357 | 22.1844  |
| 2969.13  | 3.876923 | 9.648569 | 0.198923 | 10.03029 | 31.83686 | -16.6673 | 48.50414 | 21.68879 |
| 3071.319 | 3.118421 | 10.67653 | 0.210396 | 10.22518 | 31.22514 | -19.5197 | 50.74486 | 19.21593 |
| 3043.4   | 4.666667 | 8.338459 | 0.183626 | 9.777416 | 30.71686 | -14.6931 | 45.41    | 21.82645 |
| 2729.098 | 3.833333 | 10.26425 | 0.20757  | 10.15239 | 31.23957 | -18.2101 | 49.44971 | 20.62871 |
| 2833.384 | 3.666667 | 10.54802 | 0.218217 | 10.18309 | 31.266   | -17.0713 | 48.33729 | 21.86225 |
| 2860.531 | 3.444444 | 9.393533 | 0.200529 | 10.19238 | 30.72586 | -16.118  | 46.84386 | 22.39519 |
| 3101.577 | 4.0625   | 9.365044 | 0.20081  | 9.821972 | 31.23814 | -15.3983 | 46.63643 | 22.05755 |
| 3089.078 | 3.850746 | 10.15646 | 0.208547 | 9.921092 | 32.163   | -16.5381 | 48.70114 | 23.13301 |
| 2550.962 | 3.486111 | 9.757453 | 0.199574 | 10.23631 | 30.00514 | -18.8861 | 48.89129 | 20.20426 |
| 3080.584 | 4.131148 | 9.272258 | 0.191442 | 10.11107 | 32.01786 | -16.416  | 48.43386 | 23.07747 |
| 3036.646 | 4.245902 | 9.330536 | 0.193925 | 10.15762 | 31.97314 | -16.141  | 48.11414 | 22.95326 |
| 2828.368 | 3.80303  | 9.689591 | 0.202829 | 10.269   | 31.03414 | -16.738  | 47.77214 | 22.14646 |
| 2703.508 | 3.637681 | 10.27859 | 0.206883 | 10.33822 | 30.76129 | -18.9217 | 49.683   | 20.56579 |
| 3326.608 | 3.619718 | 8.961124 | 0.193185 | 9.86121  | 32.33814 | -14.0481 | 46.38629 | 13.45416 |
| 3124.07  | 3.848485 | 9.289995 | 0.197856 | 9.90706  | 31.66843 | -15.2849 | 46.95329 | 22.29269 |
| 2345.926 | 3.266667 | 9.0665   | 0.186425 | 10.52026 | 28.78571 | -19.8477 | 48.63343 | 20.50251 |
| 3043.4   | 4.666667 | 8.338459 | 0.183626 | 9.777416 | 30.71686 | -14.6931 | 45.41    | 21.82645 |
| 2703.508 | 3.637681 | 10.27859 | 0.206883 | 10.33822 | 30.76129 | -18.9217 | 49.683   | 20.56579 |
| 2345.926 | 3.266667 | 9.0665   | 0.186425 | 10.52026 | 28.78571 | -19.8477 | 48.63343 | 20.50251 |
| 3043.4   | 4.666667 | 8.338459 | 0.183626 | 9.777416 | 30.71686 | -14.6931 | 45.41    | 21.82645 |
| 2729.098 | 3.833333 | 10.26425 | 0.20757  | 10.15239 | 31.23957 | -18.2101 | 49.44971 | 20.62871 |
| 2578.469 | 3.108108 | 8.448527 | 0.179642 | 10.28123 | 27.71686 | -19.313  | 47.02986 | 19.43304 |
| 2969.13  | 3.876923 | 9.648569 | 0.198923 | 10.03029 | 31.83686 | -16.6673 | 48.50414 | 21.68879 |
| 2345.926 | 3.266667 | 9.0665   | 0.186425 | 10.52026 | 28.78571 | -19.8477 | 48.63343 | 20.50251 |
| 3088.305 | 4.35     | 9.927816 | 0.204093 | 10.03794 | 32.08886 | -16.5547 | 48.64357 | 22.1844  |
| 2715.243 | 3.597222 | 10.52134 | 0.209668 | 10.40458 | 29.67014 | -20.5107 | 50.18086 | 13.72431 |
| 2951.18  | 3.053333 | 10.2714  | 0.201403 | 10.33048 | 30.78543 | -20.2139 | 50.99929 | 21.25676 |
| 2746.081 | 3.081081 | 9.047838 | 0.191149 | 10.30719 | 28.64843 | -18.6854 | 47.33386 | 10.59751 |
| 3036.646 | 4.245902 | 9.330536 | 0.193925 | 10.15762 | 31.97314 | -16.141  | 48.11414 | 22.95326 |
| 2720.62  | 3.924242 | 9.211519 | 0.193151 | 10.20257 | 30.18943 | -17.5013 | 47.69071 | 20.48316 |
| 2971.976 | 3.507042 | 9.839538 | 0.196129 | 10.30251 | 30.57086 | -19.5979 | 50.16871 | 11.47576 |
| 2729.098 | 3.833333 | 10.26425 | 0.20757  | 10.15239 | 31.23957 | -18.2101 | 49.44971 | 20.62871 |
| 2870.028 | 3.830769 | 9.322591 | 0.191365 | 10.07967 | 31.28729 | -17.429  | 48.71629 | 22.80193 |
| 3043.4   | 4.666667 | 8.338459 | 0.183626 | 9.777416 | 30.71686 | -14.6931 | 45.41    | 21.82645 |
| 2774.309 | 3.521739 | 9.703014 | 0.202362 | 9.963909 | 30.53629 | -17.4124 | 47.94871 | 20.75152 |
| 3043.4   | 4.666667 | 8.338459 | 0.183626 | 9.777416 | 30.71686 | -14.6931 | 45.41    | 21.82645 |

Table S2 - Anonymized database

|          |          |          |          |          |          |          |          |          |
|----------|----------|----------|----------|----------|----------|----------|----------|----------|
| 2676.259 | 3.272727 | 10.39109 | 0.21017  | 10.40598 | 29.52929 | -19.9121 | 49.44143 | 13.31791 |
| 2720.62  | 3.924242 | 9.211519 | 0.193151 | 10.20257 | 30.18943 | -17.5013 | 47.69071 | 20.48316 |
| 2818.002 | 3.118421 | 10.37036 | 0.198005 | 10.45229 | 30.28257 | -22.0917 | 52.37429 | 22.04617 |
| 2833.384 | 3.666667 | 10.54802 | 0.218217 | 10.18309 | 31.266   | -17.0713 | 48.33729 | 21.86225 |
| 3124.07  | 3.848485 | 9.289995 | 0.197856 | 9.90706  | 31.66843 | -15.2849 | 46.95329 | 22.29269 |
| 2626.119 | 3.089744 | 9.693341 | 0.202767 | 10.41368 | 29.196   | -18.6094 | 47.80543 | 13.31518 |
| 2720.62  | 3.924242 | 9.211519 | 0.193151 | 10.20257 | 30.18943 | -17.5013 | 47.69071 | 20.48316 |
| 2786.842 | 3.459459 | 10.20735 | 0.2062   | 10.50743 | 30.02157 | -19.4807 | 49.50229 | 13.98523 |
| 2832.254 | 3.757576 | 10.66365 | 0.212504 | 10.19024 | 32.00971 | -18.1711 | 50.18086 | 21.19691 |
| 2438.76  | 3.666667 | 10.27292 | 0.207676 | 10.36404 | 29.74414 | -19.722  | 49.46614 | 20.88198 |
| 3067.424 | 3.80597  | 9.968374 | 0.208515 | 9.825926 | 31.84486 | -15.9617 | 47.80657 | 22.07466 |
| 2971.976 | 3.507042 | 9.839538 | 0.196129 | 10.30251 | 30.57086 | -19.5979 | 50.16871 | 11.47576 |
| 2844.379 | 3.457143 | 9.777613 | 0.196765 | 10.34554 | 29.874   | -19.8179 | 49.69186 | 17.44609 |
| 2662.224 | 3.742424 | 9.530261 | 0.19745  | 10.28178 | 29.99014 | -18.2766 | 48.26671 | 20.23103 |
| 3043.4   | 4.666667 | 8.338459 | 0.183626 | 9.777416 | 30.71686 | -14.6931 | 45.41    | 21.82645 |
| 2513.247 | 3.088608 | 9.5855   | 0.203461 | 10.44502 | 28.597   | -18.5153 | 47.11229 | 13.03295 |
| 2971.976 | 3.507042 | 9.839538 | 0.196129 | 10.30251 | 30.57086 | -19.5979 | 50.16871 | 11.47576 |
| 3071.319 | 3.118421 | 10.67653 | 0.210396 | 10.22518 | 31.22514 | -19.5197 | 50.74486 | 19.21593 |
| 2969.13  | 3.876923 | 9.648569 | 0.198923 | 10.03029 | 31.83686 | -16.6673 | 48.50414 | 21.68879 |
| 2774.309 | 3.521739 | 9.703014 | 0.202362 | 9.963909 | 30.53629 | -17.4124 | 47.94871 | 20.75152 |
| 3047.869 | 3.56338  | 9.76008  | 0.198343 | 10.34188 | 30.90171 | -18.3063 | 49.208   | 11.8681  |
| 3123.806 | 4.09375  | 9.686827 | 0.205102 | 9.774654 | 31.555   | -15.6743 | 47.22929 | 23.08931 |
| 2606.346 | 3.632353 | 10.4301  | 0.211153 | 9.995482 | 31.43443 | -17.9614 | 49.39586 | 19.88637 |
| 2774.309 | 3.521739 | 9.703014 | 0.202362 | 9.963909 | 30.53629 | -17.4124 | 47.94871 | 20.75152 |
| 3043.4   | 4.666667 | 8.338459 | 0.183626 | 9.777416 | 30.71686 | -14.6931 | 45.41    | 21.82645 |
| 3052.728 | 4.09375  | 10.09171 | 0.206352 | 9.916827 | 32.14229 | -16.7631 | 48.90543 | 22.94353 |
| 2578.469 | 3.108108 | 8.448527 | 0.179642 | 10.28123 | 27.71686 | -19.313  | 47.02986 | 19.43304 |
| 3043.4   | 4.666667 | 8.338459 | 0.183626 | 9.777416 | 30.71686 | -14.6931 | 45.41    | 21.82645 |
| 3161.414 | 3.818182 | 9.904945 | 0.208156 | 9.826251 | 32.09357 | -15.4906 | 47.58414 | 23.34493 |
| 2969.13  | 3.876923 | 9.648569 | 0.198923 | 10.03029 | 31.83686 | -16.6673 | 48.50414 | 21.68879 |
| 2720.62  | 3.924242 | 9.211519 | 0.193151 | 10.20257 | 30.18943 | -17.5013 | 47.69071 | 20.48316 |
| 3101.577 | 4.0625   | 9.365044 | 0.20081  | 9.821972 | 31.23814 | -15.3983 | 46.63643 | 22.05755 |
| 3071.319 | 3.118421 | 10.67653 | 0.210396 | 10.22518 | 31.22514 | -19.5197 | 50.74486 | 19.21593 |
| 2940.962 | 3.907692 | 9.768635 | 0.205861 | 9.845118 | 31.60629 | -15.8463 | 47.45257 | 21.61192 |
| 2720.62  | 3.924242 | 9.211519 | 0.193151 | 10.20257 | 30.18943 | -17.5013 | 47.69071 | 20.48316 |
| 3146.277 | 4.163934 | 8.829821 | 0.191257 | 9.872304 | 31.41214 | -14.7553 | 46.16743 | 22.35059 |
| 3036.646 | 4.245902 | 9.330536 | 0.193925 | 10.15762 | 31.97314 | -16.141  | 48.11414 | 22.95326 |
| 2720.62  | 3.924242 | 9.211519 | 0.193151 | 10.20257 | 30.18943 | -17.5013 | 47.69071 | 20.48316 |
| 3052.728 | 4.09375  | 10.09171 | 0.206352 | 9.916827 | 32.14229 | -16.7631 | 48.90543 | 22.94353 |
| 2560.472 | 3.720588 | 8.935824 | 0.184992 | 10.23391 | 28.98629 | -19.3176 | 48.30386 | 19.71297 |
| 2925.869 | 3.550725 | 9.70975  | 0.195793 | 10.40932 | 30.23286 | -19.3591 | 49.592   | 22.56089 |
| 3146.171 | 4.129032 | 9.04708  | 0.188025 | 10.1896  | 32.14929 | -15.9671 | 48.11643 | 23.42611 |
| 2997.424 | 3.865672 | 9.59628  | 0.200211 | 9.834272 | 31.40686 | -16.524  | 47.93086 | 21.7804  |
| 2720.62  | 3.924242 | 9.211519 | 0.193151 | 10.20257 | 30.18943 | -17.5013 | 47.69071 | 20.48316 |
| 3360.511 | 3.676471 | 9.281052 | 0.197939 | 9.89741  | 32.93729 | -13.9511 | 46.88843 | 23.31316 |
| 2715.243 | 3.597222 | 10.52134 | 0.209668 | 10.40458 | 29.67014 | -20.5107 | 50.18086 | 13.72431 |
| 3124.07  | 3.848485 | 9.289995 | 0.197856 | 9.90706  | 31.66843 | -15.2849 | 46.95329 | 22.29269 |
| 3011.265 | 4.078125 | 10.22993 | 0.208462 | 9.95724  | 31.96543 | -17.1079 | 49.07329 | 22.03953 |
| 3043.4   | 4.666667 | 8.338459 | 0.183626 | 9.777416 | 30.71686 | -14.6931 | 45.41    | 21.82645 |
| 3052.728 | 4.09375  | 10.09171 | 0.206352 | 9.916827 | 32.14229 | -16.7631 | 48.90543 | 22.94353 |

Table S2 - Anonymized database

|          |          |          |          |          |          |          |          |          |
|----------|----------|----------|----------|----------|----------|----------|----------|----------|
| 2917.31  | 3.408451 | 9.877948 | 0.198858 | 10.37929 | 30.34514 | -19.3283 | 49.67343 | 17.77062 |
| 3516.29  | 3.577465 | 8.945646 | 0.195036 | 9.882489 | 32.96786 | -12.8987 | 45.86657 | 14.22615 |
| 2923.503 | 3.148649 | 10.07393 | 0.197836 | 10.34481 | 30.52557 | -20.395  | 50.92057 | 22.45725 |
| 3025.46  | 4.03125  | 9.863706 | 0.207216 | 9.835521 | 31.501   | -16.1    | 47.601   | 22.77145 |
| 3025.46  | 4.03125  | 9.863706 | 0.207216 | 9.835521 | 31.501   | -16.1    | 47.601   | 22.77145 |
| 2844.379 | 3.457143 | 9.777613 | 0.196765 | 10.34554 | 29.874   | -19.8179 | 49.69186 | 17.44609 |
| 2396.535 | 3.337838 | 10.65104 | 0.212531 | 10.44231 | 28.519   | -21.5961 | 50.11514 | 19.19645 |
| 2617.909 | 3.608696 | 10.25447 | 0.209609 | 10.15016 | 30.47357 | -18.4484 | 48.922   | 21.03759 |
| 2774.309 | 3.521739 | 9.703014 | 0.202362 | 9.963909 | 30.53629 | -17.4124 | 47.94871 | 20.75152 |
| 3009.203 | 3.628571 | 9.71153  | 0.197405 | 10.3599  | 30.71229 | -18.4837 | 49.196   | 11.6938  |
| 3089.078 | 3.850746 | 10.15646 | 0.208547 | 9.921092 | 32.163   | -16.5381 | 48.70114 | 23.13301 |
| 3066.458 | 4.095238 | 10.02045 | 0.20307  | 10.07719 | 31.792   | -17.5527 | 49.34471 | 22.81733 |
| 3516.29  | 3.577465 | 8.945646 | 0.195036 | 9.882489 | 32.96786 | -12.8987 | 45.86657 | 14.22615 |
| 2729.098 | 3.833333 | 10.26425 | 0.20757  | 10.15239 | 31.23957 | -18.2101 | 49.44971 | 20.62871 |
| 2610.051 | 3.213333 | 9.584712 | 0.202486 | 10.53074 | 29.096   | -18.2391 | 47.33514 | 15.18559 |
| 3079.435 | 3.342466 | 9.668865 | 0.194996 | 10.36921 | 31.41586 | -18.1691 | 49.585   | 23.25553 |
| 2513.247 | 3.088608 | 9.5855   | 0.203461 | 10.44502 | 28.597   | -18.5153 | 47.11229 | 13.03295 |
| 2774.309 | 3.521739 | 9.703014 | 0.202362 | 9.963909 | 30.53629 | -17.4124 | 47.94871 | 20.75152 |
| 3025.46  | 4.03125  | 9.863706 | 0.207216 | 9.835521 | 31.501   | -16.1    | 47.601   | 22.77145 |
| 3011.265 | 4.078125 | 10.22993 | 0.208462 | 9.95724  | 31.96543 | -17.1079 | 49.07329 | 22.03953 |
| 2703.508 | 3.637681 | 10.27859 | 0.206883 | 10.33822 | 30.76129 | -18.9217 | 49.683   | 20.56579 |
| 2774.309 | 3.521739 | 9.703014 | 0.202362 | 9.963909 | 30.53629 | -17.4124 | 47.94871 | 20.75152 |
| 2987.64  | 3.585714 | 9.621104 | 0.194823 | 10.3977  | 30.63357 | -18.7501 | 49.38371 | 22.88703 |
| 2860.531 | 3.444444 | 9.393533 | 0.200529 | 10.19238 | 30.72586 | -16.118  | 46.84386 | 22.39519 |
| 2623.688 | 3.380282 | 10.20546 | 0.207272 | 10.0447  | 31.07271 | -18.1644 | 49.23714 | 20.00774 |
| 2818.002 | 3.118421 | 10.37036 | 0.198005 | 10.45229 | 30.28257 | -22.0917 | 52.37429 | 22.04617 |
| 3157.675 | 4.131148 | 9.31247  | 0.192054 | 10.1149  | 32.12743 | -16.3613 | 48.48871 | 22.48246 |
| 3096.618 | 4.063492 | 9.568456 | 0.202182 | 9.796947 | 31.35657 | -15.9694 | 47.326   | 22.03666 |
| 2550.962 | 3.486111 | 9.757453 | 0.199574 | 10.23631 | 30.00514 | -18.8861 | 48.89129 | 20.20426 |
| 3132.089 | 4.15873  | 9.632898 | 0.203246 | 10.0056  | 32.07814 | -15.3171 | 47.39529 | 22.36384 |
| 2969.13  | 3.876923 | 9.648569 | 0.198923 | 10.03029 | 31.83686 | -16.6673 | 48.50414 | 21.68879 |
| 3329.211 | 3.823529 | 8.944313 | 0.193079 | 9.856359 | 32.189   | -14.1356 | 46.32457 | 13.50888 |
| 3079.162 | 4.241935 | 10.34929 | 0.208999 | 9.971054 | 32.49586 | -17.0226 | 49.51843 | 23.08395 |
| 2578.469 | 3.108108 | 8.448527 | 0.179642 | 10.28123 | 27.71686 | -19.313  | 47.02986 | 19.43304 |
| 2720.62  | 3.924242 | 9.211519 | 0.193151 | 10.20257 | 30.18943 | -17.5013 | 47.69071 | 20.48316 |
| 2560.472 | 3.720588 | 8.935824 | 0.184992 | 10.23391 | 28.98629 | -19.3176 | 48.30386 | 19.71297 |
| 3041.622 | 3.066667 | 10.70262 | 0.210772 | 10.22507 | 30.71586 | -20.0623 | 50.77814 | 19.18052 |
| 2206.389 | 3.434211 | 9.759786 | 0.202076 | 10.26453 | 27.81157 | -20.4861 | 48.29771 | 18.98945 |
| 2922.614 | 3.236111 | 10.04527 | 0.198393 | 10.28965 | 30.32329 | -20.31   | 50.63329 | 21.06594 |
| 3326.608 | 3.619718 | 8.961124 | 0.193185 | 9.86121  | 32.33814 | -14.0481 | 46.38629 | 13.45416 |
| 3047.869 | 3.56338  | 9.76008  | 0.198343 | 10.34188 | 30.90171 | -18.3063 | 49.208   | 11.8681  |
| 2990.374 | 3.9375   | 10.12846 | 0.208523 | 10.01187 | 32.73057 | -15.8417 | 48.57229 | 21.84768 |
| 2971.976 | 3.507042 | 9.839538 | 0.196129 | 10.30251 | 30.57086 | -19.5979 | 50.16871 | 11.47576 |
| 3039.765 | 4.16129  | 9.341959 | 0.20026  | 9.829737 | 31.31429 | -15.3349 | 46.64914 | 21.90146 |
| 2593.717 | 3.441176 | 9.290489 | 0.195748 | 10.15841 | 28.16857 | -19.2929 | 47.46143 | 19.6807  |
| 2438.76  | 3.666667 | 10.27292 | 0.207676 | 10.36404 | 29.74414 | -19.722  | 49.46614 | 20.88198 |
| 2951.18  | 3.053333 | 10.2714  | 0.201403 | 10.33048 | 30.78543 | -20.2139 | 50.99929 | 21.25676 |
| 3016.139 | 3.478873 | 9.383418 | 0.190313 | 10.37424 | 30.54371 | -18.7614 | 49.30514 | 21.4313  |
| 3039.765 | 4.16129  | 9.341959 | 0.20026  | 9.829737 | 31.31429 | -15.3349 | 46.64914 | 21.90146 |
| 2206.389 | 3.434211 | 9.759786 | 0.202076 | 10.26453 | 27.81157 | -20.4861 | 48.29771 | 18.98945 |

Table S2 - Anonymized database

|          |          |          |          |          |          |          |          |          |
|----------|----------|----------|----------|----------|----------|----------|----------|----------|
| 3041.622 | 3.066667 | 10.70262 | 0.210772 | 10.22507 | 30.71586 | -20.0623 | 50.77814 | 19.18052 |
| 2463.622 | 3.150685 | 9.611519 | 0.200193 | 10.07934 | 27.71114 | -20.3001 | 48.01129 | 18.82339 |
| 2345.926 | 3.266667 | 9.0665   | 0.186425 | 10.52026 | 28.78571 | -19.8477 | 48.63343 | 20.50251 |
| 2990.374 | 3.9375   | 10.12846 | 0.208523 | 10.01187 | 32.73057 | -15.8417 | 48.57229 | 21.84768 |
| 2786.908 | 3.492958 | 9.800266 | 0.210128 | 10.2229  | 30.51757 | -16.122  | 46.63957 | 22.05495 |
| 2774.309 | 3.521739 | 9.703014 | 0.202362 | 9.963909 | 30.53629 | -17.4124 | 47.94871 | 20.75152 |
| 2345.926 | 3.266667 | 9.0665   | 0.186425 | 10.52026 | 28.78571 | -19.8477 | 48.63343 | 20.50251 |
| 3023.486 | 3.273973 | 9.743431 | 0.194456 | 10.34775 | 30.96843 | -19.1377 | 50.10614 | 21.54044 |
| 2951.18  | 3.053333 | 10.2714  | 0.201403 | 10.33048 | 30.78543 | -20.2139 | 50.99929 | 21.25676 |
| 2345.926 | 3.266667 | 9.0665   | 0.186425 | 10.52026 | 28.78571 | -19.8477 | 48.63343 | 20.50251 |
| 3047.869 | 3.56338  | 9.76008  | 0.198343 | 10.34188 | 30.90171 | -18.3063 | 49.208   | 11.8681  |
| 2720.62  | 3.924242 | 9.211519 | 0.193151 | 10.20257 | 30.18943 | -17.5013 | 47.69071 | 20.48316 |
| 2997.424 | 3.865672 | 9.59628  | 0.200211 | 9.834272 | 31.40686 | -16.524  | 47.93086 | 21.7804  |
| 3036.521 | 4.098361 | 9.444434 | 0.194661 | 10.04042 | 31.90829 | -16.609  | 48.51729 | 21.97524 |
| 2513.247 | 3.088608 | 9.5855   | 0.203461 | 10.44502 | 28.597   | -18.5153 | 47.11229 | 13.03295 |
| 3043.4   | 4.666667 | 8.338459 | 0.183626 | 9.777416 | 30.71686 | -14.6931 | 45.41    | 21.82645 |
| 2550.962 | 3.486111 | 9.757453 | 0.199574 | 10.23631 | 30.00514 | -18.8861 | 48.89129 | 20.20426 |
| 2940.962 | 3.907692 | 9.768635 | 0.205861 | 9.845118 | 31.60629 | -15.8463 | 47.45257 | 21.61192 |
| 2550.962 | 3.486111 | 9.757453 | 0.199574 | 10.23631 | 30.00514 | -18.8861 | 48.89129 | 20.20426 |
| 3101.577 | 4.0625   | 9.365044 | 0.20081  | 9.821972 | 31.23814 | -15.3983 | 46.63643 | 22.05755 |
| 3016.139 | 3.478873 | 9.383418 | 0.190313 | 10.37424 | 30.54371 | -18.7614 | 49.30514 | 21.4313  |
| 3101.577 | 4.0625   | 9.365044 | 0.20081  | 9.821972 | 31.23814 | -15.3983 | 46.63643 | 22.05755 |
| 3171.111 | 4.047619 | 8.83475  | 0.184868 | 10.20737 | 32.19429 | -15.5951 | 47.78943 | 23.54588 |
| 2355.08  | 3.507042 | 11.32059 | 0.223415 | 10.31362 | 29.91371 | -20.7569 | 50.67057 | 18.80301 |
| 2912.877 | 3.148649 | 10.111   | 0.198425 | 10.32885 | 30.51443 | -20.4419 | 50.95629 | 22.40084 |
| 2513.247 | 3.088608 | 9.5855   | 0.203461 | 10.44502 | 28.597   | -18.5153 | 47.11229 | 13.03295 |
| 2824.231 | 3.892308 | 10.20289 | 0.211236 | 9.986661 | 31.64171 | -16.6593 | 48.301   | 21.143   |
| 3043.4   | 4.666667 | 8.338459 | 0.183626 | 9.777416 | 30.71686 | -14.6931 | 45.41    | 21.82645 |
| 2992.128 | 3.380282 | 10.1615  | 0.200691 | 10.28589 | 30.84043 | -19.7921 | 50.63257 | 11.59315 |
| 2645.201 | 3.569444 | 10.45767 | 0.208788 | 10.33064 | 29.44329 | -20.6443 | 50.08757 | 13.41331 |
| 3146.171 | 4.129032 | 9.04708  | 0.188025 | 10.1896  | 32.14929 | -15.9671 | 48.11643 | 23.42611 |
| 2438.76  | 3.666667 | 10.27292 | 0.207676 | 10.36404 | 29.74414 | -19.722  | 49.46614 | 20.88198 |
| 3432.799 | 3.642857 | 8.921    | 0.191537 | 9.942755 | 33.01786 | -13.558  | 46.57586 | 13.77671 |
| 3222.86  | 4.288136 | 8.841277 | 0.182143 | 10.18231 | 32.28086 | -16.2594 | 48.54029 | 23.67093 |
| 2676.259 | 3.272727 | 10.39109 | 0.21017  | 10.40598 | 29.52929 | -19.9121 | 49.44143 | 13.31791 |
| 2818.002 | 3.118421 | 10.37036 | 0.198005 | 10.45229 | 30.28257 | -22.0917 | 52.37429 | 22.04617 |
| 3020.883 | 4.112903 | 9.512231 | 0.202034 | 9.840979 | 31.40357 | -15.6789 | 47.08243 | 21.8846  |
| 2513.247 | 3.088608 | 9.5855   | 0.203461 | 10.44502 | 28.597   | -18.5153 | 47.11229 | 13.03295 |
| 2832.254 | 3.757576 | 10.66365 | 0.212504 | 10.19024 | 32.00971 | -18.1711 | 50.18086 | 21.19691 |
| 2720.62  | 3.924242 | 9.211519 | 0.193151 | 10.20257 | 30.18943 | -17.5013 | 47.69071 | 20.48316 |
| 2396.535 | 3.337838 | 10.65104 | 0.212531 | 10.44231 | 28.519   | -21.5961 | 50.11514 | 19.19645 |
| 3157.675 | 4.131148 | 9.31247  | 0.192054 | 10.1149  | 32.12743 | -16.3613 | 48.48871 | 22.48246 |
| 3079.162 | 4.241935 | 10.34929 | 0.208999 | 9.971054 | 32.49586 | -17.0226 | 49.51843 | 23.08395 |
| 3124.07  | 3.848485 | 9.289995 | 0.197856 | 9.90706  | 31.66843 | -15.2849 | 46.95329 | 22.29269 |
| 2925.869 | 3.550725 | 9.70975  | 0.195793 | 10.40932 | 30.23286 | -19.3591 | 49.592   | 22.56089 |
| 3047.869 | 3.56338  | 9.76008  | 0.198343 | 10.34188 | 30.90171 | -18.3063 | 49.208   | 11.8681  |
| 2438.76  | 3.666667 | 10.27292 | 0.207676 | 10.36404 | 29.74414 | -19.722  | 49.46614 | 20.88198 |
| 2355.08  | 3.507042 | 11.32059 | 0.223415 | 10.31362 | 29.91371 | -20.7569 | 50.67057 | 18.80301 |
| 2952.344 | 3.424658 | 9.764739 | 0.196614 | 10.43063 | 30.56929 | -19.0951 | 49.66443 | 11.56935 |
| 2860.531 | 3.444444 | 9.393533 | 0.200529 | 10.19238 | 30.72586 | -16.118  | 46.84386 | 22.39519 |

Table S2 - Anonymized database

|          |          |          |          |          |          |          |          |          |
|----------|----------|----------|----------|----------|----------|----------|----------|----------|
| 2818.002 | 3.118421 | 10.37036 | 0.198005 | 10.45229 | 30.28257 | -22.0917 | 52.37429 | 22.04617 |
| 2979.006 | 3.514286 | 9.7355   | 0.197383 | 10.40052 | 30.39414 | -18.9287 | 49.32286 | 22.82912 |
| 3169.654 | 3.619718 | 9.142538 | 0.196486 | 9.755498 | 31.73257 | -14.7977 | 46.53029 | 12.84766 |
| 3052.366 | 4.129032 | 9.698566 | 0.200726 | 10.05568 | 31.85843 | -16.459  | 48.31743 | 22.07512 |
| 3007.729 | 3.923077 | 9.609654 | 0.200674 | 9.936124 | 32.10071 | -15.7863 | 47.887   | 21.88538 |
| 3052.728 | 4.09375  | 10.09171 | 0.206352 | 9.916827 | 32.14229 | -16.7631 | 48.90543 | 22.94353 |
| 3101.577 | 4.0625   | 9.365044 | 0.20081  | 9.821972 | 31.23814 | -15.3983 | 46.63643 | 22.05755 |
| 2676.259 | 3.272727 | 10.39109 | 0.21017  | 10.40598 | 29.52929 | -19.9121 | 49.44143 | 13.31791 |
| 2987.64  | 3.585714 | 9.621104 | 0.194823 | 10.3977  | 30.63357 | -18.7501 | 49.38371 | 22.88703 |
| 3063.674 | 3.892308 | 9.501245 | 0.202792 | 9.763144 | 31.00114 | -15.851  | 46.85214 | 21.86049 |
| 3109.165 | 4.092308 | 9.821316 | 0.205086 | 9.853863 | 31.83357 | -16.0553 | 47.88886 | 23.22146 |
| 2719.538 | 3.80597  | 10.14394 | 0.204419 | 10.16886 | 31.16057 | -18.4626 | 49.62314 | 20.62244 |
| 2355.08  | 3.507042 | 11.32059 | 0.223415 | 10.31362 | 29.91371 | -20.7569 | 50.67057 | 18.80301 |
| 3124.07  | 3.848485 | 9.289995 | 0.197856 | 9.90706  | 31.66843 | -15.2849 | 46.95329 | 22.29269 |
| 3171.111 | 4.047619 | 8.83475  | 0.184868 | 10.20737 | 32.19429 | -15.5951 | 47.78943 | 23.54588 |
| 2917.31  | 3.408451 | 9.877948 | 0.198858 | 10.37929 | 30.34514 | -19.3283 | 49.67343 | 17.77062 |
| 2513.247 | 3.088608 | 9.5855   | 0.203461 | 10.44502 | 28.597   | -18.5153 | 47.11229 | 13.03295 |
| 3009.203 | 3.628571 | 9.71153  | 0.197405 | 10.3599  | 30.71229 | -18.4837 | 49.196   | 11.6938  |
| 3184.869 | 4.079365 | 9.347069 | 0.202388 | 9.779507 | 31.50871 | -14.6751 | 46.18386 | 23.39989 |
| 2206.389 | 3.434211 | 9.759786 | 0.202076 | 10.26453 | 27.81157 | -20.4861 | 48.29771 | 18.98945 |
| 3088.452 | 4.095238 | 9.72039  | 0.204079 | 9.84008  | 31.868   | -15.7624 | 47.63043 | 23.05503 |
| 2940.962 | 3.907692 | 9.768635 | 0.205861 | 9.845118 | 31.60629 | -15.8463 | 47.45257 | 21.61192 |
| 3011.265 | 4.078125 | 10.22993 | 0.208462 | 9.95724  | 31.96543 | -17.1079 | 49.07329 | 22.03953 |
| 3042.166 | 3.681818 | 9.684217 | 0.200545 | 9.978877 | 31.73586 | -16.5537 | 48.28957 | 21.85101 |
| 2989.027 | 3.361111 | 9.706876 | 0.196767 | 10.39114 | 30.61429 | -18.7176 | 49.33186 | 22.89026 |
| 2720.62  | 3.924242 | 9.211519 | 0.193151 | 10.20257 | 30.18943 | -17.5013 | 47.69071 | 20.48316 |
| 2637.779 | 3.210526 | 9.619613 | 0.201082 | 10.43597 | 29.08286 | -18.7563 | 47.83914 | 13.39855 |
| 3071.319 | 3.118421 | 10.67653 | 0.210396 | 10.22518 | 31.22514 | -19.5197 | 50.74486 | 19.21593 |
| 2844.379 | 3.457143 | 9.777613 | 0.196765 | 10.34554 | 29.874   | -19.8179 | 49.69186 | 17.44609 |
| 2971.976 | 3.507042 | 9.839538 | 0.196129 | 10.30251 | 30.57086 | -19.5979 | 50.16871 | 11.47576 |
| 3025.46  | 4.03125  | 9.863706 | 0.207216 | 9.835521 | 31.501   | -16.1    | 47.601   | 22.77145 |
| 3036.521 | 4.098361 | 9.444434 | 0.194661 | 10.04042 | 31.90829 | -16.609  | 48.51729 | 21.97524 |
| 2818.002 | 3.118421 | 10.37036 | 0.198005 | 10.45229 | 30.28257 | -22.0917 | 52.37429 | 22.04617 |
| 2593.717 | 3.441176 | 9.290489 | 0.195748 | 10.15841 | 28.16857 | -19.2929 | 47.46143 | 19.6807  |
| 2940.962 | 3.907692 | 9.768635 | 0.205861 | 9.845118 | 31.60629 | -15.8463 | 47.45257 | 21.61192 |
| 3020.883 | 4.112903 | 9.512231 | 0.202034 | 9.840979 | 31.40357 | -15.6789 | 47.08243 | 21.8846  |
| 2396.535 | 3.337838 | 10.65104 | 0.212531 | 10.44231 | 28.519   | -21.5961 | 50.11514 | 19.19645 |
| 2720.62  | 3.924242 | 9.211519 | 0.193151 | 10.20257 | 30.18943 | -17.5013 | 47.69071 | 20.48316 |
| 3020.883 | 4.112903 | 9.512231 | 0.202034 | 9.840979 | 31.40357 | -15.6789 | 47.08243 | 21.8846  |
| 2355.08  | 3.507042 | 11.32059 | 0.223415 | 10.31362 | 29.91371 | -20.7569 | 50.67057 | 18.80301 |
| 2206.389 | 3.434211 | 9.759786 | 0.202076 | 10.26453 | 27.81157 | -20.4861 | 48.29771 | 18.98945 |
| 3011.265 | 4.078125 | 10.22993 | 0.208462 | 9.95724  | 31.96543 | -17.1079 | 49.07329 | 22.03953 |
| 3039.765 | 4.16129  | 9.341959 | 0.20026  | 9.829737 | 31.31429 | -15.3349 | 46.64914 | 21.90146 |
| 3023.486 | 3.273973 | 9.743431 | 0.194456 | 10.34775 | 30.96843 | -19.1377 | 50.10614 | 21.54044 |
| 3157.675 | 4.131148 | 9.31247  | 0.192054 | 10.1149  | 32.12743 | -16.3613 | 48.48871 | 22.48246 |
| 3132.089 | 4.15873  | 9.632898 | 0.203246 | 10.0056  | 32.07814 | -15.3171 | 47.39529 | 22.36384 |
| 3123.806 | 4.09375  | 9.686827 | 0.205102 | 9.774654 | 31.555   | -15.6743 | 47.22929 | 23.08931 |
| 2926.277 | 3.8      | 10.21629 | 0.214888 | 10.05581 | 30.92871 | -16.6137 | 47.54243 | 21.35853 |
| 2206.389 | 3.434211 | 9.759786 | 0.202076 | 10.26453 | 27.81157 | -20.4861 | 48.29771 | 18.98945 |
| 3124.07  | 3.848485 | 9.289995 | 0.197856 | 9.90706  | 31.66843 | -15.2849 | 46.95329 | 22.29269 |



Table S2 - Anonymized database

|          |          |          |          |          |          |          |          |          |
|----------|----------|----------|----------|----------|----------|----------|----------|----------|
| 3011.265 | 4.078125 | 10.22993 | 0.208462 | 9.95724  | 31.96543 | -17.1079 | 49.07329 | 22.03953 |
| 2506.682 | 3.637681 | 8.851797 | 0.185123 | 10.22822 | 28.75129 | -19.0644 | 47.81571 | 19.48459 |
| 2606.346 | 3.632353 | 10.4301  | 0.211153 | 9.995482 | 31.43443 | -17.9614 | 49.39586 | 19.88637 |
| 2438.76  | 3.666667 | 10.27292 | 0.207676 | 10.36404 | 29.74414 | -19.722  | 49.46614 | 20.88198 |
| 3160.261 | 4.109375 | 9.709338 | 0.204196 | 9.885808 | 32.01771 | -15.5313 | 47.549   | 21.68932 |
| 3043.4   | 4.666667 | 8.338459 | 0.183626 | 9.777416 | 30.71686 | -14.6931 | 45.41    | 21.82645 |
| 2774.309 | 3.521739 | 9.703014 | 0.202362 | 9.963909 | 30.53629 | -17.4124 | 47.94871 | 20.75152 |
| 3043.4   | 4.666667 | 8.338459 | 0.183626 | 9.777416 | 30.71686 | -14.6931 | 45.41    | 21.82645 |
| 3096.618 | 4.063492 | 9.568456 | 0.202182 | 9.796947 | 31.35657 | -15.9694 | 47.326   | 22.03666 |
| 2598.688 | 3.438356 | 9.616374 | 0.201647 | 10.44363 | 29.066   | -18.6231 | 47.68914 | 13.24516 |
| 3052.728 | 4.09375  | 10.09171 | 0.206352 | 9.916827 | 32.14229 | -16.7631 | 48.90543 | 22.94353 |
| 3036.521 | 4.098361 | 9.444434 | 0.194661 | 10.04042 | 31.90829 | -16.609  | 48.51729 | 21.97524 |
| 3160.261 | 4.109375 | 9.709338 | 0.204196 | 9.885808 | 32.01771 | -15.5313 | 47.549   | 21.68932 |
| 3071.319 | 3.118421 | 10.67653 | 0.210396 | 10.22518 | 31.22514 | -19.5197 | 50.74486 | 19.21593 |
| 3124.07  | 3.848485 | 9.289995 | 0.197856 | 9.90706  | 31.66843 | -15.2849 | 46.95329 | 22.29269 |
| 2513.247 | 3.088608 | 9.5855   | 0.203461 | 10.44502 | 28.597   | -18.5153 | 47.11229 | 13.03295 |
| 2774.309 | 3.521739 | 9.703014 | 0.202362 | 9.963909 | 30.53629 | -17.4124 | 47.94871 | 20.75152 |
| 2720.62  | 3.924242 | 9.211519 | 0.193151 | 10.20257 | 30.18943 | -17.5013 | 47.69071 | 20.48316 |
| 2617.909 | 3.608696 | 10.25447 | 0.209609 | 10.15016 | 30.47357 | -18.4484 | 48.922   | 21.03759 |
| 2940.962 | 3.907692 | 9.768635 | 0.205861 | 9.845118 | 31.60629 | -15.8463 | 47.45257 | 21.61192 |
| 2987.64  | 3.585714 | 9.621104 | 0.194823 | 10.3977  | 30.63357 | -18.7501 | 49.38371 | 22.88703 |
| 3011.265 | 4.078125 | 10.22993 | 0.208462 | 9.95724  | 31.96543 | -17.1079 | 49.07329 | 22.03953 |
| 3011.265 | 4.078125 | 10.22993 | 0.208462 | 9.95724  | 31.96543 | -17.1079 | 49.07329 | 22.03953 |
| 3011.265 | 4.078125 | 10.22993 | 0.208462 | 9.95724  | 31.96543 | -17.1079 | 49.07329 | 22.03953 |
| 3071.319 | 3.118421 | 10.67653 | 0.210396 | 10.22518 | 31.22514 | -19.5197 | 50.74486 | 19.21593 |
| 2637.797 | 3.647059 | 10.26389 | 0.209853 | 10.07175 | 30.58243 | -18.3276 | 48.91    | 20.10075 |
| 3146.277 | 4.163934 | 8.829821 | 0.191257 | 9.872304 | 31.41214 | -14.7553 | 46.16743 | 22.35059 |
| 3066.458 | 4.095238 | 10.02045 | 0.20307  | 10.07719 | 31.792   | -17.5527 | 49.34471 | 22.81733 |
| 3326.608 | 3.619718 | 8.961124 | 0.193185 | 9.86121  | 32.33814 | -14.0481 | 46.38629 | 13.45416 |
| 2720.62  | 3.924242 | 9.211519 | 0.193151 | 10.20257 | 30.18943 | -17.5013 | 47.69071 | 20.48316 |
| 3052.728 | 4.09375  | 10.09171 | 0.206352 | 9.916827 | 32.14229 | -16.7631 | 48.90543 | 22.94353 |
| 3036.646 | 4.245902 | 9.330536 | 0.193925 | 10.15762 | 31.97314 | -16.141  | 48.11414 | 22.95326 |
| 3096.618 | 4.063492 | 9.568456 | 0.202182 | 9.796947 | 31.35657 | -15.9694 | 47.326   | 22.03666 |
| 2833.384 | 3.666667 | 10.54802 | 0.218217 | 10.18309 | 31.266   | -17.0713 | 48.33729 | 21.86225 |
| 2355.08  | 3.507042 | 11.32059 | 0.223415 | 10.31362 | 29.91371 | -20.7569 | 50.67057 | 18.80301 |
| 3043.4   | 4.666667 | 8.338459 | 0.183626 | 9.777416 | 30.71686 | -14.6931 | 45.41    | 21.82645 |
| 2833.384 | 3.666667 | 10.54802 | 0.218217 | 10.18309 | 31.266   | -17.0713 | 48.33729 | 21.86225 |
| 3173.402 | 3.921875 | 9.196533 | 0.198058 | 9.808554 | 31.55871 | -14.8749 | 46.43357 | 22.51121 |
| 3079.435 | 3.342466 | 9.668865 | 0.194996 | 10.36921 | 31.41586 | -18.1691 | 49.585   | 23.25553 |
| 2484.856 | 3.637681 | 10.41304 | 0.208482 | 10.37992 | 29.147   | -20.8    | 49.947   | 19.61129 |
| 3096.618 | 4.063492 | 9.568456 | 0.202182 | 9.796947 | 31.35657 | -15.9694 | 47.326   | 22.03666 |
| 3043.4   | 4.666667 | 8.338459 | 0.183626 | 9.777416 | 30.71686 | -14.6931 | 45.41    | 21.82645 |
| 2987.64  | 3.585714 | 9.621104 | 0.194823 | 10.3977  | 30.63357 | -18.7501 | 49.38371 | 22.88703 |
| 2206.389 | 3.434211 | 9.759786 | 0.202076 | 10.26453 | 27.81157 | -20.4861 | 48.29771 | 18.98945 |
| 3129.049 | 4.2      | 9.489887 | 0.194885 | 10.12341 | 32.04429 | -16.6506 | 48.69486 | 23.24579 |
| 2833.384 | 3.666667 | 10.54802 | 0.218217 | 10.18309 | 31.266   | -17.0713 | 48.33729 | 21.86225 |
| 2729.098 | 3.833333 | 10.26425 | 0.20757  | 10.15239 | 31.23957 | -18.2101 | 49.44971 | 20.62871 |
| 2746.081 | 3.081081 | 9.047838 | 0.191149 | 10.30719 | 28.64843 | -18.6854 | 47.33386 | 10.59751 |
| 3088.305 | 4.35     | 9.927816 | 0.204093 | 10.03794 | 32.08886 | -16.5547 | 48.64357 | 22.1844  |
| 3036.521 | 4.098361 | 9.444434 | 0.194661 | 10.04042 | 31.90829 | -16.609  | 48.51729 | 21.97524 |

Table S2 - Anonymized database

|          |          |          |          |          |          |          |          |          |
|----------|----------|----------|----------|----------|----------|----------|----------|----------|
| 2940.962 | 3.907692 | 9.768635 | 0.205861 | 9.845118 | 31.60629 | -15.8463 | 47.45257 | 21.61192 |
| 3009.203 | 3.628571 | 9.71153  | 0.197405 | 10.3599  | 30.71229 | -18.4837 | 49.196   | 11.6938  |
| 3157.675 | 4.131148 | 9.31247  | 0.192054 | 10.1149  | 32.12743 | -16.3613 | 48.48871 | 22.48246 |
| 2355.08  | 3.507042 | 11.32059 | 0.223415 | 10.31362 | 29.91371 | -20.7569 | 50.67057 | 18.80301 |
| 3123.806 | 4.09375  | 9.686827 | 0.205102 | 9.774654 | 31.555   | -15.6743 | 47.22929 | 23.08931 |
| 3132.831 | 3.742424 | 9.895681 | 0.207888 | 9.981043 | 31.94986 | -15.6511 | 47.601   | 22.23615 |
| 3088.452 | 4.095238 | 9.72039  | 0.204079 | 9.84008  | 31.868   | -15.7624 | 47.63043 | 23.05503 |
| 2703.508 | 3.637681 | 10.27859 | 0.206883 | 10.33822 | 30.76129 | -18.9217 | 49.683   | 20.56579 |
| 3065.358 | 3.764706 | 9.782505 | 0.206515 | 9.84485  | 31.603   | -15.7666 | 47.36957 | 22.95677 |
| 3030.293 | 3.450704 | 9.858533 | 0.198719 | 10.33327 | 30.87457 | -18.7359 | 49.61043 | 11.79528 |
| 2940.962 | 3.907692 | 9.768635 | 0.205861 | 9.845118 | 31.60629 | -15.8463 | 47.45257 | 21.61192 |
| 3146.277 | 4.163934 | 8.829821 | 0.191257 | 9.872304 | 31.41214 | -14.7553 | 46.16743 | 22.35059 |
| 3232.691 | 4.16129  | 9.788929 | 0.208078 | 9.755859 | 32.24229 | -14.8023 | 47.04457 | 24.2802  |
| 3043.4   | 4.666667 | 8.338459 | 0.183626 | 9.777416 | 30.71686 | -14.6931 | 45.41    | 21.82645 |
| 2720.62  | 3.924242 | 9.211519 | 0.193151 | 10.20257 | 30.18943 | -17.5013 | 47.69071 | 20.48316 |
| 3253.218 | 4.274194 | 9.606536 | 0.202983 | 9.875097 | 32.23571 | -15.091  | 47.32671 | 13.2132  |
| 2821.627 | 3.535211 | 9.850964 | 0.207337 | 10.20544 | 30.81671 | -16.6951 | 47.51186 | 21.74653 |
| 3146.171 | 4.129032 | 9.04708  | 0.188025 | 10.1896  | 32.14929 | -15.9671 | 48.11643 | 23.42611 |
| 3052.366 | 4.129032 | 9.698566 | 0.200726 | 10.05568 | 31.85843 | -16.459  | 48.31743 | 22.07512 |
| 2729.098 | 3.833333 | 10.26425 | 0.20757  | 10.15239 | 31.23957 | -18.2101 | 49.44971 | 20.62871 |
| 3232.691 | 4.16129  | 9.788929 | 0.208078 | 9.755859 | 32.24229 | -14.8023 | 47.04457 | 24.2802  |
| 2513.247 | 3.088608 | 9.5855   | 0.203461 | 10.44502 | 28.597   | -18.5153 | 47.11229 | 13.03295 |
| 2718.073 | 3.12     | 9.238385 | 0.192095 | 10.2745  | 28.56386 | -19.529  | 48.09286 | 20.09524 |
| 3049.273 | 4.063492 | 9.502195 | 0.20322  | 9.824579 | 31.45443 | -15.3037 | 46.75814 | 21.94865 |
| 2720.62  | 3.924242 | 9.211519 | 0.193151 | 10.20257 | 30.18943 | -17.5013 | 47.69071 | 20.48316 |
| 3047.869 | 3.56338  | 9.76008  | 0.198343 | 10.34188 | 30.90171 | -18.3063 | 49.208   | 11.8681  |
| 2623.688 | 3.380282 | 10.20546 | 0.207272 | 10.0447  | 31.07271 | -18.1644 | 49.23714 | 20.00774 |
| 2463.622 | 3.150685 | 9.611519 | 0.200193 | 10.07934 | 27.71114 | -20.3001 | 48.01129 | 18.82339 |
| 2992.128 | 3.380282 | 10.1615  | 0.200691 | 10.28589 | 30.84043 | -19.7921 | 50.63257 | 11.59315 |
| 3079.435 | 3.342466 | 9.668865 | 0.194996 | 10.36921 | 31.41586 | -18.1691 | 49.585   | 23.25553 |
| 2774.309 | 3.521739 | 9.703014 | 0.202362 | 9.963909 | 30.53629 | -17.4124 | 47.94871 | 20.75152 |
| 2940.962 | 3.907692 | 9.768635 | 0.205861 | 9.845118 | 31.60629 | -15.8463 | 47.45257 | 21.61192 |
| 3080.584 | 4.131148 | 9.272258 | 0.191442 | 10.11107 | 32.01786 | -16.416  | 48.43386 | 23.07747 |
| 3345.531 | 3.791045 | 9.12561  | 0.193741 | 9.919523 | 32.98914 | -14.113  | 47.10214 | 13.41591 |
| 2774.309 | 3.521739 | 9.703014 | 0.202362 | 9.963909 | 30.53629 | -17.4124 | 47.94871 | 20.75152 |
| 2718.073 | 3.12     | 9.238385 | 0.192095 | 10.2745  | 28.56386 | -19.529  | 48.09286 | 20.09524 |
| 3036.521 | 4.098361 | 9.444434 | 0.194661 | 10.04042 | 31.90829 | -16.609  | 48.51729 | 21.97524 |
| 3063.674 | 3.892308 | 9.501245 | 0.202792 | 9.763144 | 31.00114 | -15.851  | 46.85214 | 21.86049 |
| 3169.654 | 3.619718 | 9.142538 | 0.196486 | 9.755498 | 31.73257 | -14.7977 | 46.53029 | 12.84766 |
| 2940.962 | 3.907692 | 9.768635 | 0.205861 | 9.845118 | 31.60629 | -15.8463 | 47.45257 | 21.61192 |
| 3043.4   | 4.666667 | 8.338459 | 0.183626 | 9.777416 | 30.71686 | -14.6931 | 45.41    | 21.82645 |
| 2997.424 | 3.865672 | 9.59628  | 0.200211 | 9.834272 | 31.40686 | -16.524  | 47.93086 | 21.7804  |
| 2720.62  | 3.924242 | 9.211519 | 0.193151 | 10.20257 | 30.18943 | -17.5013 | 47.69071 | 20.48316 |
| 2637.797 | 3.647059 | 10.26389 | 0.209853 | 10.07175 | 30.58243 | -18.3276 | 48.91    | 20.10075 |
| 2206.389 | 3.434211 | 9.759786 | 0.202076 | 10.26453 | 27.81157 | -20.4861 | 48.29771 | 18.98945 |
| 3039.765 | 4.16129  | 9.341959 | 0.20026  | 9.829737 | 31.31429 | -15.3349 | 46.64914 | 21.90146 |
| 2951.18  | 3.053333 | 10.2714  | 0.201403 | 10.33048 | 30.78543 | -20.2139 | 50.99929 | 21.25676 |
| 2617.909 | 3.608696 | 10.25447 | 0.209609 | 10.15016 | 30.47357 | -18.4484 | 48.922   | 21.03759 |
| 3041.622 | 3.066667 | 10.70262 | 0.210772 | 10.22507 | 30.71586 | -20.0623 | 50.77814 | 19.18052 |
| 3016.139 | 3.478873 | 9.383418 | 0.190313 | 10.37424 | 30.54371 | -18.7614 | 49.30514 | 21.4313  |

Table S2 - Anonymized database

|          |          |          |          |          |          |          |          |          |
|----------|----------|----------|----------|----------|----------|----------|----------|----------|
| 2720.62  | 3.924242 | 9.211519 | 0.193151 | 10.20257 | 30.18943 | -17.5013 | 47.69071 | 20.48316 |
| 3339.664 | 4.174603 | 9.129423 | 0.19655  | 9.850078 | 32.232   | -14.2164 | 46.44843 | 13.57277 |
| 3096.618 | 4.063492 | 9.568456 | 0.202182 | 9.796947 | 31.35657 | -15.9694 | 47.326   | 22.03666 |
| 3080.584 | 4.131148 | 9.272258 | 0.191442 | 10.11107 | 32.01786 | -16.416  | 48.43386 | 23.07747 |
| 2578.469 | 3.108108 | 8.448527 | 0.179642 | 10.28123 | 27.71686 | -19.313  | 47.02986 | 19.43304 |
| 3146.277 | 4.163934 | 8.829821 | 0.191257 | 9.872304 | 31.41214 | -14.7553 | 46.16743 | 22.35059 |
| 3043.4   | 4.666667 | 8.338459 | 0.183626 | 9.777416 | 30.71686 | -14.6931 | 45.41    | 21.82645 |
| 2554.498 | 3.731343 | 10.29718 | 0.213109 | 10.02711 | 30.34971 | -17.9691 | 48.31886 | 19.85525 |
| 3043.4   | 4.666667 | 8.338459 | 0.183626 | 9.777416 | 30.71686 | -14.6931 | 45.41    | 21.82645 |
| 2971.976 | 3.507042 | 9.839538 | 0.196129 | 10.30251 | 30.57086 | -19.5979 | 50.16871 | 11.47576 |
| 2751.918 | 3.746269 | 10.9468  | 0.226119 | 9.881999 | 31.41943 | -16.9921 | 48.41157 | 20.7932  |
| 2955.56  | 4.147541 | 9.553184 | 0.195655 | 10.03982 | 31.40329 | -17.4234 | 48.82671 | 21.63962 |
| 2816.375 | 4.225806 | 10.11058 | 0.201421 | 10.25443 | 31.65743 | -18.5389 | 50.19629 | 21.09371 |
| 2715.243 | 3.597222 | 10.52134 | 0.209668 | 10.40458 | 29.67014 | -20.5107 | 50.18086 | 13.72431 |
| 2774.309 | 3.521739 | 9.703014 | 0.202362 | 9.963909 | 30.53629 | -17.4124 | 47.94871 | 20.75152 |
| 2550.962 | 3.486111 | 9.757453 | 0.199574 | 10.23631 | 30.00514 | -18.8861 | 48.89129 | 20.20426 |
| 3036.646 | 4.245902 | 9.330536 | 0.193925 | 10.15762 | 31.97314 | -16.141  | 48.11414 | 22.95326 |
| 2786.842 | 3.459459 | 10.20735 | 0.2062   | 10.50743 | 30.02157 | -19.4807 | 49.50229 | 13.98523 |
| 2593.717 | 3.441176 | 9.290489 | 0.195748 | 10.15841 | 28.16857 | -19.2929 | 47.46143 | 19.6807  |
| 3146.277 | 4.163934 | 8.829821 | 0.191257 | 9.872304 | 31.41214 | -14.7553 | 46.16743 | 22.35059 |
| 3101.577 | 4.0625   | 9.365044 | 0.20081  | 9.821972 | 31.23814 | -15.3983 | 46.63643 | 22.05755 |
| 3043.4   | 4.666667 | 8.338459 | 0.183626 | 9.777416 | 30.71686 | -14.6931 | 45.41    | 21.82645 |
| 3036.646 | 4.245902 | 9.330536 | 0.193925 | 10.15762 | 31.97314 | -16.141  | 48.11414 | 22.95326 |
| 3124.07  | 3.848485 | 9.289995 | 0.197856 | 9.90706  | 31.66843 | -15.2849 | 46.95329 | 22.29269 |
| 3143.601 | 3.848485 | 9.72933  | 0.204933 | 9.861557 | 32.02443 | -15.4513 | 47.47571 | 23.28599 |
| 2438.76  | 3.666667 | 10.27292 | 0.207676 | 10.36404 | 29.74414 | -19.722  | 49.46614 | 20.88198 |
| 3011.265 | 4.078125 | 10.22993 | 0.208462 | 9.95724  | 31.96543 | -17.1079 | 49.07329 | 22.03953 |
| 2719.538 | 3.80597  | 10.14394 | 0.204419 | 10.16886 | 31.16057 | -18.4626 | 49.62314 | 20.62244 |
| 2833.384 | 3.666667 | 10.54802 | 0.218217 | 10.18309 | 31.266   | -17.0713 | 48.33729 | 21.86225 |
| 3109.165 | 4.092308 | 9.821316 | 0.205086 | 9.853863 | 31.83357 | -16.0553 | 47.88886 | 23.22146 |
| 2484.856 | 3.637681 | 10.41304 | 0.208482 | 10.37992 | 29.147   | -20.8    | 49.947   | 19.61129 |
| 3025.46  | 4.03125  | 9.863706 | 0.207216 | 9.835521 | 31.501   | -16.1    | 47.601   | 22.77145 |
| 3052.366 | 4.129032 | 9.698566 | 0.200726 | 10.05568 | 31.85843 | -16.459  | 48.31743 | 22.07512 |
| 2626.119 | 3.089744 | 9.693341 | 0.202767 | 10.41368 | 29.196   | -18.6094 | 47.80543 | 13.31518 |
| 2844.379 | 3.457143 | 9.777613 | 0.196765 | 10.34554 | 29.874   | -19.8179 | 49.69186 | 17.44609 |
| 2206.389 | 3.434211 | 9.759786 | 0.202076 | 10.26453 | 27.81157 | -20.4861 | 48.29771 | 18.98945 |
| 3080.584 | 4.131148 | 9.272258 | 0.191442 | 10.11107 | 32.01786 | -16.416  | 48.43386 | 23.07747 |
| 2463.622 | 3.150685 | 9.611519 | 0.200193 | 10.07934 | 27.71114 | -20.3001 | 48.01129 | 18.82339 |
| 2513.247 | 3.088608 | 9.5855   | 0.203461 | 10.44502 | 28.597   | -18.5153 | 47.11229 | 13.03295 |
| 2593.717 | 3.441176 | 9.290489 | 0.195748 | 10.15841 | 28.16857 | -19.2929 | 47.46143 | 19.6807  |
| 2598.688 | 3.438356 | 9.616374 | 0.201647 | 10.44363 | 29.066   | -18.6231 | 47.68914 | 13.24516 |
| 3079.435 | 3.342466 | 9.668865 | 0.194996 | 10.36921 | 31.41586 | -18.1691 | 49.585   | 23.25553 |
| 2992.128 | 3.380282 | 10.1615  | 0.200691 | 10.28589 | 30.84043 | -19.7921 | 50.63257 | 11.59315 |
| 2617.909 | 3.608696 | 10.25447 | 0.209609 | 10.15016 | 30.47357 | -18.4484 | 48.922   | 21.03759 |
| 2971.976 | 3.507042 | 9.839538 | 0.196129 | 10.30251 | 30.57086 | -19.5979 | 50.16871 | 11.47576 |
| 2720.62  | 3.924242 | 9.211519 | 0.193151 | 10.20257 | 30.18943 | -17.5013 | 47.69071 | 20.48316 |
| 2961.49  | 3.833333 | 9.770547 | 0.203823 | 9.890176 | 31.73357 | -16.2029 | 47.93643 | 21.72685 |
| 2720.62  | 3.924242 | 9.211519 | 0.193151 | 10.20257 | 30.18943 | -17.5013 | 47.69071 | 20.48316 |
| 3011.265 | 4.078125 | 10.22993 | 0.208462 | 9.95724  | 31.96543 | -17.1079 | 49.07329 | 22.03953 |
| 2206.389 | 3.434211 | 9.759786 | 0.202076 | 10.26453 | 27.81157 | -20.4861 | 48.29771 | 18.98945 |

Table S2 - Anonymized database

|          |          |          |          |          |          |          |          |          |
|----------|----------|----------|----------|----------|----------|----------|----------|----------|
| 3146.277 | 4.163934 | 8.829821 | 0.191257 | 9.872304 | 31.41214 | -14.7553 | 46.16743 | 22.35059 |
| 2729.098 | 3.833333 | 10.26425 | 0.20757  | 10.15239 | 31.23957 | -18.2101 | 49.44971 | 20.62871 |
| 2844.379 | 3.457143 | 9.777613 | 0.196765 | 10.34554 | 29.874   | -19.8179 | 49.69186 | 17.44609 |
| 3047.869 | 3.56338  | 9.76008  | 0.198343 | 10.34188 | 30.90171 | -18.3063 | 49.208   | 11.8681  |
| 2560.472 | 3.720588 | 8.935824 | 0.184992 | 10.23391 | 28.98629 | -19.3176 | 48.30386 | 19.71297 |
| 2720.62  | 3.924242 | 9.211519 | 0.193151 | 10.20257 | 30.18943 | -17.5013 | 47.69071 | 20.48316 |
| 3052.728 | 4.09375  | 10.09171 | 0.206352 | 9.916827 | 32.14229 | -16.7631 | 48.90543 | 22.94353 |
| 3036.646 | 4.245902 | 9.330536 | 0.193925 | 10.15762 | 31.97314 | -16.141  | 48.11414 | 22.95326 |
| 3158.928 | 4.125    | 9.289349 | 0.195812 | 9.996184 | 31.92857 | -15.5116 | 47.44014 | 22.46529 |
| 3067.424 | 3.80597  | 9.968374 | 0.208515 | 9.825926 | 31.84486 | -15.9617 | 47.80657 | 22.07466 |
| 2513.247 | 3.088608 | 9.5855   | 0.203461 | 10.44502 | 28.597   | -18.5153 | 47.11229 | 13.03295 |
| 2513.247 | 3.088608 | 9.5855   | 0.203461 | 10.44502 | 28.597   | -18.5153 | 47.11229 | 13.03295 |
| 2662.224 | 3.742424 | 9.530261 | 0.19745  | 10.28178 | 29.99014 | -18.2766 | 48.26671 | 20.23103 |
| 2720.62  | 3.924242 | 9.211519 | 0.193151 | 10.20257 | 30.18943 | -17.5013 | 47.69071 | 20.48316 |
| 2729.098 | 3.833333 | 10.26425 | 0.20757  | 10.15239 | 31.23957 | -18.2101 | 49.44971 | 20.62871 |
| 2689.903 | 3.217949 | 9.952698 | 0.20402  | 10.44442 | 29.31957 | -19.4633 | 48.78286 | 13.32329 |
| 3079.435 | 3.342466 | 9.668865 | 0.194996 | 10.36921 | 31.41586 | -18.1691 | 49.585   | 23.25553 |
| 2818.002 | 3.118421 | 10.37036 | 0.198005 | 10.45229 | 30.28257 | -22.0917 | 52.37429 | 22.04617 |
| 2513.247 | 3.088608 | 9.5855   | 0.203461 | 10.44502 | 28.597   | -18.5153 | 47.11229 | 13.03295 |
| 2206.389 | 3.434211 | 9.759786 | 0.202076 | 10.26453 | 27.81157 | -20.4861 | 48.29771 | 18.98945 |
| 2979.006 | 3.514286 | 9.7355   | 0.197383 | 10.40052 | 30.39414 | -18.9287 | 49.32286 | 22.82912 |
| 2719.538 | 3.80597  | 10.14394 | 0.204419 | 10.16886 | 31.16057 | -18.4626 | 49.62314 | 20.62244 |
| 3355.584 | 3.823529 | 8.960777 | 0.194525 | 9.82302  | 32.09971 | -13.9653 | 46.065   | 23.33846 |
| 3157.675 | 4.131148 | 9.31247  | 0.192054 | 10.1149  | 32.12743 | -16.3613 | 48.48871 | 22.48246 |
| 2334.449 | 3.444444 | 9.741253 | 0.198649 | 10.44967 | 28.95714 | -20.0804 | 49.03757 | 20.41729 |
| 3009.203 | 3.628571 | 9.71153  | 0.197405 | 10.3599  | 30.71229 | -18.4837 | 49.196   | 11.6938  |
| 3041.622 | 3.066667 | 10.70262 | 0.210772 | 10.22507 | 30.71586 | -20.0623 | 50.77814 | 19.18052 |
| 2926.277 | 3.8      | 10.21629 | 0.214888 | 10.05581 | 30.92871 | -16.6137 | 47.54243 | 21.35853 |
| 3025.46  | 4.03125  | 9.863706 | 0.207216 | 9.835521 | 31.501   | -16.1    | 47.601   | 22.77145 |
| 2818.002 | 3.118421 | 10.37036 | 0.198005 | 10.45229 | 30.28257 | -22.0917 | 52.37429 | 22.04617 |
| 3089.078 | 3.850746 | 10.15646 | 0.208547 | 9.921092 | 32.163   | -16.5381 | 48.70114 | 23.13301 |
| 2969.13  | 3.876923 | 9.648569 | 0.198923 | 10.03029 | 31.83686 | -16.6673 | 48.50414 | 21.68879 |
| 3016.139 | 3.478873 | 9.383418 | 0.190313 | 10.37424 | 30.54371 | -18.7614 | 49.30514 | 21.4313  |
| 3345.531 | 3.791045 | 9.12561  | 0.193741 | 9.919523 | 32.98914 | -14.113  | 47.10214 | 13.41591 |
| 2560.472 | 3.720588 | 8.935824 | 0.184992 | 10.23391 | 28.98629 | -19.3176 | 48.30386 | 19.71297 |
| 3036.521 | 4.098361 | 9.444434 | 0.194661 | 10.04042 | 31.90829 | -16.609  | 48.51729 | 21.97524 |
| 2438.76  | 3.666667 | 10.27292 | 0.207676 | 10.36404 | 29.74414 | -19.722  | 49.46614 | 20.88198 |
| 2626.119 | 3.089744 | 9.693341 | 0.202767 | 10.41368 | 29.196   | -18.6094 | 47.80543 | 13.31518 |
| 2345.926 | 3.266667 | 9.0665   | 0.186425 | 10.52026 | 28.78571 | -19.8477 | 48.63343 | 20.50251 |
| 2513.247 | 3.088608 | 9.5855   | 0.203461 | 10.44502 | 28.597   | -18.5153 | 47.11229 | 13.03295 |
| 2940.962 | 3.907692 | 9.768635 | 0.205861 | 9.845118 | 31.60629 | -15.8463 | 47.45257 | 21.61192 |
| 3146.277 | 4.163934 | 8.829821 | 0.191257 | 9.872304 | 31.41214 | -14.7553 | 46.16743 | 22.35059 |
| 2355.08  | 3.507042 | 11.32059 | 0.223415 | 10.31362 | 29.91371 | -20.7569 | 50.67057 | 18.80301 |
| 3047.869 | 3.56338  | 9.76008  | 0.198343 | 10.34188 | 30.90171 | -18.3063 | 49.208   | 11.8681  |
| 2951.18  | 3.053333 | 10.2714  | 0.201403 | 10.33048 | 30.78543 | -20.2139 | 50.99929 | 21.25676 |
| 3071.319 | 3.118421 | 10.67653 | 0.210396 | 10.22518 | 31.22514 | -19.5197 | 50.74486 | 19.21593 |
| 3063.674 | 3.892308 | 9.501245 | 0.202792 | 9.763144 | 31.00114 | -15.851  | 46.85214 | 21.86049 |
| 3160.261 | 4.109375 | 9.709338 | 0.204196 | 9.885808 | 32.01771 | -15.5313 | 47.549   | 21.68932 |
| 2637.797 | 3.647059 | 10.26389 | 0.209853 | 10.07175 | 30.58243 | -18.3276 | 48.91    | 20.10075 |
| 3088.305 | 4.35     | 9.927816 | 0.204093 | 10.03794 | 32.08886 | -16.5547 | 48.64357 | 22.1844  |

Table S2 - Anonymized database

|          |          |          |          |          |          |          |          |          |
|----------|----------|----------|----------|----------|----------|----------|----------|----------|
| 3161.414 | 3.818182 | 9.904945 | 0.208156 | 9.826251 | 32.09357 | -15.4906 | 47.58414 | 23.34493 |
| 2940.962 | 3.907692 | 9.768635 | 0.205861 | 9.845118 | 31.60629 | -15.8463 | 47.45257 | 21.61192 |
| 2578.469 | 3.108108 | 8.448527 | 0.179642 | 10.28123 | 27.71686 | -19.313  | 47.02986 | 19.43304 |
| 3009.203 | 3.628571 | 9.71153  | 0.197405 | 10.3599  | 30.71229 | -18.4837 | 49.196   | 11.6938  |
| 3011.265 | 4.078125 | 10.22993 | 0.208462 | 9.95724  | 31.96543 | -17.1079 | 49.07329 | 22.03953 |
| 3047.869 | 3.56338  | 9.76008  | 0.198343 | 10.34188 | 30.90171 | -18.3063 | 49.208   | 11.8681  |
| 2940.962 | 3.907692 | 9.768635 | 0.205861 | 9.845118 | 31.60629 | -15.8463 | 47.45257 | 21.61192 |
| 2987.64  | 3.585714 | 9.621104 | 0.194823 | 10.3977  | 30.63357 | -18.7501 | 49.38371 | 22.88703 |
| 2513.247 | 3.088608 | 9.5855   | 0.203461 | 10.44502 | 28.597   | -18.5153 | 47.11229 | 13.03295 |
| 2593.717 | 3.441176 | 9.290489 | 0.195748 | 10.15841 | 28.16857 | -19.2929 | 47.46143 | 19.6807  |
| 2997.424 | 3.865672 | 9.59628  | 0.200211 | 9.834272 | 31.40686 | -16.524  | 47.93086 | 21.7804  |
| 3036.646 | 4.245902 | 9.330536 | 0.193925 | 10.15762 | 31.97314 | -16.141  | 48.11414 | 22.95326 |
| 2396.535 | 3.337838 | 10.65104 | 0.212531 | 10.44231 | 28.519   | -21.5961 | 50.11514 | 19.19645 |
| 2438.76  | 3.666667 | 10.27292 | 0.207676 | 10.36404 | 29.74414 | -19.722  | 49.46614 | 20.88198 |
| 2833.384 | 3.666667 | 10.54802 | 0.218217 | 10.18309 | 31.266   | -17.0713 | 48.33729 | 21.86225 |
| 3036.521 | 4.098361 | 9.444434 | 0.194661 | 10.04042 | 31.90829 | -16.609  | 48.51729 | 21.97524 |
| 2939.377 | 3.541667 | 9.598382 | 0.194586 | 10.42902 | 30.412   | -18.9151 | 49.32714 | 11.47931 |
| 3345.531 | 3.791045 | 9.12561  | 0.193741 | 9.919523 | 32.98914 | -14.113  | 47.10214 | 13.41591 |
| 2550.962 | 3.486111 | 9.757453 | 0.199574 | 10.23631 | 30.00514 | -18.8861 | 48.89129 | 20.20426 |
| 2345.926 | 3.266667 | 9.0665   | 0.186425 | 10.52026 | 28.78571 | -19.8477 | 48.63343 | 20.50251 |
| 2729.098 | 3.833333 | 10.26425 | 0.20757  | 10.15239 | 31.23957 | -18.2101 | 49.44971 | 20.62871 |
| 3016.139 | 3.478873 | 9.383418 | 0.190313 | 10.37424 | 30.54371 | -18.7614 | 49.30514 | 21.4313  |
| 3036.521 | 4.098361 | 9.444434 | 0.194661 | 10.04042 | 31.90829 | -16.609  | 48.51729 | 21.97524 |
| 2610.051 | 3.213333 | 9.584712 | 0.202486 | 10.53074 | 29.096   | -18.2391 | 47.33514 | 15.18559 |
| 2786.908 | 3.492958 | 9.800266 | 0.210128 | 10.2229  | 30.51757 | -16.122  | 46.63957 | 22.05495 |
| 2720.62  | 3.924242 | 9.211519 | 0.193151 | 10.20257 | 30.18943 | -17.5013 | 47.69071 | 20.48316 |
| 2940.962 | 3.907692 | 9.768635 | 0.205861 | 9.845118 | 31.60629 | -15.8463 | 47.45257 | 21.61192 |
| 3052.728 | 4.09375  | 10.09171 | 0.206352 | 9.916827 | 32.14229 | -16.7631 | 48.90543 | 22.94353 |
| 3067.424 | 3.80597  | 9.968374 | 0.208515 | 9.825926 | 31.84486 | -15.9617 | 47.80657 | 22.07466 |
| 3052.366 | 4.129032 | 9.698566 | 0.200726 | 10.05568 | 31.85843 | -16.459  | 48.31743 | 22.07512 |
| 2513.247 | 3.088608 | 9.5855   | 0.203461 | 10.44502 | 28.597   | -18.5153 | 47.11229 | 13.03295 |
| 2345.926 | 3.266667 | 9.0665   | 0.186425 | 10.52026 | 28.78571 | -19.8477 | 48.63343 | 20.50251 |
| 2969.13  | 3.876923 | 9.648569 | 0.198923 | 10.03029 | 31.83686 | -16.6673 | 48.50414 | 21.68879 |
| 2334.449 | 3.444444 | 9.741253 | 0.198649 | 10.44967 | 28.95714 | -20.0804 | 49.03757 | 20.41729 |
| 2355.08  | 3.507042 | 11.32059 | 0.223415 | 10.31362 | 29.91371 | -20.7569 | 50.67057 | 18.80301 |
| 3123.806 | 4.09375  | 9.686827 | 0.205102 | 9.774654 | 31.555   | -15.6743 | 47.22929 | 23.08931 |
| 3080.584 | 4.131148 | 9.272258 | 0.191442 | 10.11107 | 32.01786 | -16.416  | 48.43386 | 23.07747 |
| 3173.402 | 3.921875 | 9.196533 | 0.198058 | 9.808554 | 31.55871 | -14.8749 | 46.43357 | 22.51121 |
| 2940.962 | 3.907692 | 9.768635 | 0.205861 | 9.845118 | 31.60629 | -15.8463 | 47.45257 | 21.61192 |
| 2606.346 | 3.632353 | 10.4301  | 0.211153 | 9.995482 | 31.43443 | -17.9614 | 49.39586 | 19.88637 |
| 2355.08  | 3.507042 | 11.32059 | 0.223415 | 10.31362 | 29.91371 | -20.7569 | 50.67057 | 18.80301 |
| 2206.389 | 3.434211 | 9.759786 | 0.202076 | 10.26453 | 27.81157 | -20.4861 | 48.29771 | 18.98945 |
| 2578.469 | 3.108108 | 8.448527 | 0.179642 | 10.28123 | 27.71686 | -19.313  | 47.02986 | 19.43304 |
| 3345.531 | 3.791045 | 9.12561  | 0.193741 | 9.919523 | 32.98914 | -14.113  | 47.10214 | 13.41591 |
| 2484.856 | 3.637681 | 10.41304 | 0.208482 | 10.37992 | 29.147   | -20.8    | 49.947   | 19.61129 |
| 3109.165 | 4.092308 | 9.821316 | 0.205086 | 9.853863 | 31.83357 | -16.0553 | 47.88886 | 23.22146 |
| 3516.29  | 3.577465 | 8.945646 | 0.195036 | 9.882489 | 32.96786 | -12.8987 | 45.86657 | 14.22615 |
| 3345.531 | 3.791045 | 9.12561  | 0.193741 | 9.919523 | 32.98914 | -14.113  | 47.10214 | 13.41591 |
| 2751.918 | 3.746269 | 10.9468  | 0.226119 | 9.881999 | 31.41943 | -16.9921 | 48.41157 | 20.7932  |
| 3124.07  | 3.848485 | 9.289995 | 0.197856 | 9.90706  | 31.66843 | -15.2849 | 46.95329 | 22.29269 |

Table S2 - Anonymized database

|          |          |          |          |          |          |          |          |          |
|----------|----------|----------|----------|----------|----------|----------|----------|----------|
| 2955.56  | 4.147541 | 9.553184 | 0.195655 | 10.03982 | 31.40329 | -17.4234 | 48.82671 | 21.63962 |
| 2626.119 | 3.089744 | 9.693341 | 0.202767 | 10.41368 | 29.196   | -18.6094 | 47.80543 | 13.31518 |
| 2720.62  | 3.924242 | 9.211519 | 0.193151 | 10.20257 | 30.18943 | -17.5013 | 47.69071 | 20.48316 |
| 2912.877 | 3.148649 | 10.111   | 0.198425 | 10.32885 | 30.51443 | -20.4419 | 50.95629 | 22.40084 |
| 2926.277 | 3.8      | 10.21629 | 0.214888 | 10.05581 | 30.92871 | -16.6137 | 47.54243 | 21.35853 |
| 3253.218 | 4.274194 | 9.606536 | 0.202983 | 9.875097 | 32.23571 | -15.091  | 47.32671 | 13.2132  |
| 2818.002 | 3.118421 | 10.37036 | 0.198005 | 10.45229 | 30.28257 | -22.0917 | 52.37429 | 22.04617 |
| 2951.18  | 3.053333 | 10.2714  | 0.201403 | 10.33048 | 30.78543 | -20.2139 | 50.99929 | 21.25676 |
| 3132.089 | 4.15873  | 9.632898 | 0.203246 | 10.0056  | 32.07814 | -15.3171 | 47.39529 | 22.36384 |
| 3041.622 | 3.066667 | 10.70262 | 0.210772 | 10.22507 | 30.71586 | -20.0623 | 50.77814 | 19.18052 |
| 3007.729 | 3.923077 | 9.609654 | 0.200674 | 9.936124 | 32.10071 | -15.7863 | 47.887   | 21.88538 |
| 3132.089 | 4.15873  | 9.632898 | 0.203246 | 10.0056  | 32.07814 | -15.3171 | 47.39529 | 22.36384 |
| 2550.962 | 3.486111 | 9.757453 | 0.199574 | 10.23631 | 30.00514 | -18.8861 | 48.89129 | 20.20426 |
| 2832.254 | 3.757576 | 10.66365 | 0.212504 | 10.19024 | 32.00971 | -18.1711 | 50.18086 | 21.19691 |
| 2718.073 | 3.12     | 9.238385 | 0.192095 | 10.2745  | 28.56386 | -19.529  | 48.09286 | 20.09524 |
| 2818.002 | 3.118421 | 10.37036 | 0.198005 | 10.45229 | 30.28257 | -22.0917 | 52.37429 | 22.04617 |
| 3009.203 | 3.628571 | 9.71153  | 0.197405 | 10.3599  | 30.71229 | -18.4837 | 49.196   | 11.6938  |
| 2990.374 | 3.9375   | 10.12846 | 0.208523 | 10.01187 | 32.73057 | -15.8417 | 48.57229 | 21.84768 |
| 3047.869 | 3.56338  | 9.76008  | 0.198343 | 10.34188 | 30.90171 | -18.3063 | 49.208   | 11.8681  |
| 3043.4   | 4.666667 | 8.338459 | 0.183626 | 9.777416 | 30.71686 | -14.6931 | 45.41    | 21.82645 |
| 3132.089 | 4.15873  | 9.632898 | 0.203246 | 10.0056  | 32.07814 | -15.3171 | 47.39529 | 22.36384 |
| 2746.081 | 3.081081 | 9.047838 | 0.191149 | 10.30719 | 28.64843 | -18.6854 | 47.33386 | 10.59751 |
| 2912.877 | 3.148649 | 10.111   | 0.198425 | 10.32885 | 30.51443 | -20.4419 | 50.95629 | 22.40084 |
| 3157.675 | 4.131148 | 9.31247  | 0.192054 | 10.1149  | 32.12743 | -16.3613 | 48.48871 | 22.48246 |
| 2578.469 | 3.108108 | 8.448527 | 0.179642 | 10.28123 | 27.71686 | -19.313  | 47.02986 | 19.43304 |
| 2844.379 | 3.457143 | 9.777613 | 0.196765 | 10.34554 | 29.874   | -19.8179 | 49.69186 | 17.44609 |
| 2617.909 | 3.608696 | 10.25447 | 0.209609 | 10.15016 | 30.47357 | -18.4484 | 48.922   | 21.03759 |
| 3345.531 | 3.791045 | 9.12561  | 0.193741 | 9.919523 | 32.98914 | -14.113  | 47.10214 | 13.41591 |
| 2774.309 | 3.521739 | 9.703014 | 0.202362 | 9.963909 | 30.53629 | -17.4124 | 47.94871 | 20.75152 |
| 3143.601 | 3.848485 | 9.72933  | 0.204933 | 9.861557 | 32.02443 | -15.4513 | 47.47571 | 23.28599 |

Table S2 - Anonymized database

| bioc09   | bioc12   | bioc16  | bioc17  | bioc18  | bioc19  | elevation | slope    | solar_rad |
|----------|----------|---------|---------|---------|---------|-----------|----------|-----------|
| 9.044802 | 991.827  | 354.167 | 182.75  | 290.509 | 238.406 | 393.3734  | 0.883189 | 1757.257  |
| 9.044802 | 991.827  | 354.167 | 182.75  | 290.509 | 238.406 | 393.3734  | 0.883189 | 1757.257  |
| 12.52371 | 993.896  | 366.841 | 158.388 | 303.399 | 233.035 | 326.726   | 4.709216 | 1576.021  |
| 12.52371 | 993.896  | 366.841 | 158.388 | 303.399 | 233.035 | 326.726   | 4.709216 | 1576.021  |
| 12.52371 | 993.896  | 366.841 | 158.388 | 303.399 | 233.035 | 326.726   | 4.709216 | 1576.021  |
| 12.52371 | 993.896  | 366.841 | 158.388 | 303.399 | 233.035 | 326.726   | 4.709216 | 1576.021  |
| 12.52371 | 993.896  | 366.841 | 158.388 | 303.399 | 233.035 | 326.726   | 4.709216 | 1576.021  |
| 12.52371 | 993.896  | 366.841 | 158.388 | 303.399 | 233.035 | 326.726   | 4.709216 | 1576.021  |
| 12.52371 | 993.896  | 366.841 | 158.388 | 303.399 | 233.035 | 326.726   | 4.709216 | 1576.021  |
| 9.354027 | 957.175  | 340.137 | 181.652 | 277.985 | 229.463 | 288.2634  | 7.966951 | 2209.513  |
| 13.84265 | 1240.789 | 517.558 | 149.909 | 474.696 | 246.821 | 261.3956  | 2.788267 | 1863.578  |
| 12.20807 | 946.878  | 318.087 | 174.998 | 274.794 | 229.236 | 281.3162  | 5.652831 | 2044.658  |
| 12.20807 | 946.878  | 318.087 | 174.998 | 274.794 | 229.236 | 281.3162  | 5.652831 | 2044.658  |
| 12.20807 | 946.878  | 318.087 | 174.998 | 274.794 | 229.236 | 281.3162  | 5.652831 | 2044.658  |
| 12.20807 | 946.878  | 318.087 | 174.998 | 274.794 | 229.236 | 281.3162  | 5.652831 | 2044.658  |
| 12.20807 | 946.878  | 318.087 | 174.998 | 274.794 | 229.236 | 281.3162  | 5.652831 | 2044.658  |
| 0.479769 | 1017.669 | 352.698 | 182.124 | 285.505 | 245.116 | 351.0301  | 7.706647 | 1808.782  |
| 4.91122  | 1063.63  | 371.22  | 193.627 | 282.856 | 269.534 | 289.6766  | 7.741191 | 1246.598  |
| 1.375121 | 1021.311 | 345.988 | 189.06  | 237.048 | 251.852 | 342.6181  | 4.375702 | 1469.899  |
| 1.375121 | 1021.311 | 345.988 | 189.06  | 237.048 | 251.852 | 342.6181  | 4.375702 | 1469.899  |
| 4.000544 | 1011.503 | 351.963 | 179.538 | 281.873 | 241.433 | 371.2694  | 8.848426 | 2283.271  |
| 4.000544 | 1011.503 | 351.963 | 179.538 | 281.873 | 241.433 | 371.2694  | 8.848426 | 2283.271  |
| 4.000544 | 1011.503 | 351.963 | 179.538 | 281.873 | 241.433 | 371.2694  | 8.848426 | 2283.271  |
| 4.000544 | 1011.503 | 351.963 | 179.538 | 281.873 | 241.433 | 371.2694  | 8.848426 | 2283.271  |
| 4.000544 | 1011.503 | 351.963 | 179.538 | 281.873 | 241.433 | 371.2694  | 8.848426 | 2283.271  |
| 4.000544 | 1011.503 | 351.963 | 179.538 | 281.873 | 241.433 | 371.2694  | 8.848426 | 2283.271  |
| 4.000544 | 1011.503 | 351.963 | 179.538 | 281.873 | 241.433 | 371.2694  | 8.848426 | 2283.271  |
| 4.000544 | 1011.503 | 351.963 | 179.538 | 281.873 | 241.433 | 371.2694  | 8.848426 | 2283.271  |
| 15.12292 | 998.573  | 362.943 | 154.869 | 227.313 | 280.001 | 65.75416  | 1.331257 | 1836.56   |
| 15.12292 | 998.573  | 362.943 | 154.869 | 227.313 | 280.001 | 65.75416  | 1.331257 | 1836.56   |
| 7.56167  | 1085.974 | 370.378 | 169.387 | 288.858 | 317.829 | 300.4833  | 2.304261 | 1756.669  |
| 15.58609 | 1000.009 | 361.433 | 179.124 | 201.378 | 253.201 | 67.61459  | 3.770963 | 2000.362  |
| 15.58609 | 1000.009 | 361.433 | 179.124 | 201.378 | 253.201 | 67.61459  | 3.770963 | 2000.362  |
| 15.58609 | 1000.009 | 361.433 | 179.124 | 201.378 | 253.201 | 67.61459  | 3.770963 | 2000.362  |
| -0.98983 | 956.144  | 346.759 | 160.414 | 239.894 | 218.472 | 333.6983  | 3.161077 | 1300.838  |
| -0.98983 | 956.144  | 346.759 | 160.414 | 239.894 | 218.472 | 333.6983  | 3.161077 | 1300.838  |
| 14.63104 | 838.498  | 327.419 | 138.423 | 194.725 | 283.686 | 207.2583  | 1.315532 | 1774.275  |
| -1.80355 | 982.029  | 384.009 | 170.345 | 232.275 | 215.746 | 464.0417  | 2.215279 | 1849.836  |
| -1.80355 | 982.029  | 384.009 | 170.345 | 232.275 | 215.746 | 464.0417  | 2.215279 | 1849.836  |
| -1.80355 | 982.029  | 384.009 | 170.345 | 232.275 | 215.746 | 464.0417  | 2.215279 | 1849.836  |
| -1.80355 | 982.029  | 384.009 | 170.345 | 232.275 | 215.746 | 464.0417  | 2.215279 | 1849.836  |
| -1.80355 | 982.029  | 384.009 | 170.345 | 232.275 | 215.746 | 464.0417  | 2.215279 | 1849.836  |
| 14.11634 | 987.686  | 347.181 | 135.313 | 280.523 | 287.051 | 278.7108  | 2.373454 | 1633.689  |
| 15.75438 | 900.163  | 331.78  | 120.801 | 249.553 | 271.399 | 201.7106  | 1.461046 | 1938.337  |
| 12.51116 | 1099.962 | 394.828 | 165.691 | 348.036 | 290.794 | 302.7306  | 0.714524 | 1821.651  |
| 12.51116 | 1099.962 | 394.828 | 165.691 | 348.036 | 290.794 | 302.7306  | 0.714524 | 1821.651  |
| 16.90351 | 986.811  | 363.566 | 161.582 | 264.788 | 242.427 | 353.8546  | 1.464825 | 1792.748  |
| 16.90351 | 986.811  | 363.566 | 161.582 | 264.788 | 242.427 | 353.8546  | 1.464825 | 1792.748  |
| 16.90351 | 986.811  | 363.566 | 161.582 | 264.788 | 242.427 | 353.8546  | 1.464825 | 1792.748  |
| 16.90351 | 986.811  | 363.566 | 161.582 | 264.788 | 242.427 | 353.8546  | 1.464825 | 1792.748  |
| 16.90351 | 986.811  | 363.566 | 161.582 | 264.788 | 242.427 | 353.8546  | 1.464825 | 1792.748  |

Table S2 - Anonymized database

|          |          |         |         |         |         |          |          |          |
|----------|----------|---------|---------|---------|---------|----------|----------|----------|
| 12.52371 | 993.896  | 366.841 | 158.388 | 303.399 | 233.035 | 324.8262 | 4.430806 | 1452.51  |
| 12.52371 | 993.896  | 366.841 | 158.388 | 303.399 | 233.035 | 324.8262 | 4.430806 | 1452.51  |
| 12.52371 | 993.896  | 366.841 | 158.388 | 303.399 | 233.035 | 324.8262 | 4.430806 | 1452.51  |
| 12.52371 | 993.896  | 366.841 | 158.388 | 303.399 | 233.035 | 324.8262 | 4.430806 | 1452.51  |
| 12.52371 | 993.896  | 366.841 | 158.388 | 303.399 | 233.035 | 324.8262 | 4.430806 | 1452.51  |
| 12.52371 | 993.896  | 366.841 | 158.388 | 303.399 | 233.035 | 324.8262 | 4.430806 | 1452.51  |
| 12.52371 | 993.896  | 366.841 | 158.388 | 303.399 | 233.035 | 324.8262 | 4.430806 | 1452.51  |
| 14.14814 | 987.4    | 387.621 | 161.22  | 214.5   | 325.319 | 138.9436 | 4.177484 | 1768.744 |
| 7.11078  | 1049.088 | 353.943 | 146.009 | 284.948 | 296.027 | 202.8772 | 0.626459 | 1847.405 |
| 7.11078  | 1049.088 | 353.943 | 146.009 | 284.948 | 296.027 | 202.8772 | 0.626459 | 1847.405 |
| 7.11078  | 1049.088 | 353.943 | 146.009 | 284.948 | 296.027 | 202.8772 | 0.626459 | 1847.405 |
| 10.92335 | 976.525  | 356.957 | 166.786 | 307.865 | 215.414 | 383.0372 | 3.69426  | 1981.62  |
| 10.92335 | 976.525  | 356.957 | 166.786 | 307.865 | 215.414 | 383.0372 | 3.69426  | 1981.62  |
| 10.92335 | 976.525  | 356.957 | 166.786 | 307.865 | 215.414 | 383.0372 | 3.69426  | 1981.62  |
| 10.92335 | 976.525  | 356.957 | 166.786 | 307.865 | 215.414 | 383.0372 | 3.69426  | 1981.62  |
| 7.473742 | 1066.62  | 398.524 | 135.652 | 371.894 | 273.251 | 110.2755 | 2.379869 | 1729.49  |
| 7.473742 | 1066.62  | 398.524 | 135.652 | 371.894 | 273.251 | 110.2755 | 2.379869 | 1729.49  |
| 4.441451 | 1255.458 | 456.667 | 206.111 | 380.475 | 301.287 | 346.7785 | 9.205475 | 1602.376 |
| 14.77926 | 1071.804 | 368.332 | 158.335 | 315.379 | 308.669 | 216.4959 | 3.566722 | 2008.679 |
| 14.77926 | 1071.804 | 368.332 | 158.335 | 315.379 | 308.669 | 216.4959 | 3.566722 | 2008.679 |
| 8.854786 | 1061.025 | 387.175 | 189.077 | 311.413 | 246.257 | 334.6038 | 2.363094 | 1913.333 |
| 8.854786 | 1061.025 | 387.175 | 189.077 | 311.413 | 246.257 | 334.6038 | 2.363094 | 1913.333 |
| 4.12744  | 1143.212 | 368.326 | 233.217 | 302.355 | 303.292 | 332.479  | 1.43155  | 1747.347 |
| 4.12744  | 1143.212 | 368.326 | 233.217 | 302.355 | 303.292 | 332.479  | 1.43155  | 1747.347 |
| 4.12744  | 1143.212 | 368.326 | 233.217 | 302.355 | 303.292 | 332.479  | 1.43155  | 1747.347 |
| 4.12744  | 1143.212 | 368.326 | 233.217 | 302.355 | 303.292 | 332.479  | 1.43155  | 1747.347 |
| 5.010225 | 1305.261 | 546.741 | 196.548 | 523.579 | 271.212 | 354.8399 | 6.927933 | 2376.013 |
| -1.34088 | 925.463  | 302.666 | 166.731 | 241.107 | 214.488 | 502.9605 | 5.291672 | 1632.742 |
| -1.34088 | 925.463  | 302.666 | 166.731 | 241.107 | 214.488 | 502.9605 | 5.291672 | 1632.742 |
| -1.34088 | 925.463  | 302.666 | 166.731 | 241.107 | 214.488 | 502.9605 | 5.291672 | 1632.742 |
| -1.34088 | 925.463  | 302.666 | 166.731 | 241.107 | 214.488 | 502.9605 | 5.291672 | 1632.742 |
| -1.34088 | 925.463  | 302.666 | 166.731 | 241.107 | 214.488 | 502.9605 | 5.291672 | 1632.742 |
| -1.34088 | 925.463  | 302.666 | 166.731 | 241.107 | 214.488 | 502.9605 | 5.291672 | 1632.742 |
| -1.34088 | 925.463  | 302.666 | 166.731 | 241.107 | 214.488 | 502.9605 | 5.291672 | 1632.742 |
| -1.34088 | 925.463  | 302.666 | 166.731 | 241.107 | 214.488 | 502.9605 | 5.291672 | 1632.742 |
| 2.915978 | 1181.614 | 463.026 | 199.043 | 344.474 | 266.835 | 560.2236 | 2.186021 | 2000.388 |
| 2.915978 | 1181.614 | 463.026 | 199.043 | 344.474 | 266.835 | 560.2236 | 2.186021 | 2000.388 |
| -0.1286  | 1094.69  | 356.775 | 194.064 | 288.347 | 257.338 | 427.4386 | 0.903677 | 1672.949 |
| -0.1286  | 1094.69  | 356.775 | 194.064 | 288.347 | 257.338 | 427.4386 | 0.903677 | 1672.949 |
| 15.44095 | 969.157  | 366.644 | 144.347 | 243.381 | 276.543 | 61.45306 | 4.601897 | 1495.971 |
| -0.16976 | 1173.229 | 429.033 | 154.596 | 419.01  | 170.398 | 324.8262 | 4.430806 | 1452.51  |
| -0.16976 | 1173.229 | 429.033 | 154.596 | 419.01  | 170.398 | 324.8262 | 4.430806 | 1452.51  |
| -0.16976 | 1173.229 | 429.033 | 154.596 | 419.01  | 170.398 | 324.8262 | 4.430806 | 1452.51  |
| -0.16976 | 1173.229 | 429.033 | 154.596 | 419.01  | 170.398 | 324.8262 | 4.430806 | 1452.51  |
| -0.16976 | 1173.229 | 429.033 | 154.596 | 419.01  | 170.398 | 324.8262 | 4.430806 | 1452.51  |
| -0.16976 | 1173.229 | 429.033 | 154.596 | 419.01  | 170.398 | 324.8262 | 4.430806 | 1452.51  |
| -0.78801 | 1101.295 | 387.341 | 150.397 | 374.596 | 161.97  | 487.1186 | 2.469619 | 1975.047 |
| 0.621198 | 1219.512 | 468.387 | 202.814 | 393.063 | 202.814 | 311.9337 | 7.613102 | 2064.278 |
| 0.621198 | 1219.512 | 468.387 | 202.814 | 393.063 | 202.814 | 311.9337 | 7.613102 | 2064.278 |
| 0.621198 | 1219.512 | 468.387 | 202.814 | 393.063 | 202.814 | 311.9337 | 7.613102 | 2064.278 |



Table S2 - Anonymized database

|          |          |         |         |         |         |          |          |          |
|----------|----------|---------|---------|---------|---------|----------|----------|----------|
| 0.621198 | 1219.512 | 468.387 | 202.814 | 393.063 | 202.814 | 311.9337 | 7.613102 | 2064.278 |
| 0.621198 | 1219.512 | 468.387 | 202.814 | 393.063 | 202.814 | 311.9337 | 7.613102 | 2064.278 |
| 0.621198 | 1219.512 | 468.387 | 202.814 | 393.063 | 202.814 | 311.9337 | 7.613102 | 2064.278 |
| 0.621198 | 1219.512 | 468.387 | 202.814 | 393.063 | 202.814 | 311.9337 | 7.613102 | 2064.278 |
| 0.771571 | 1197.382 | 458.126 | 182.4   | 415.096 | 182.4   | 326.7982 | 10.80945 | 1379.297 |
| 0.771571 | 1197.382 | 458.126 | 182.4   | 415.096 | 182.4   | 326.7982 | 10.80945 | 1379.297 |
| 0.771571 | 1197.382 | 458.126 | 182.4   | 415.096 | 182.4   | 326.7982 | 10.80945 | 1379.297 |
| -0.17186 | 1074.032 | 360.456 | 138.771 | 343.129 | 138.771 | 175.2454 | 2.117011 | 1948.305 |
| -0.17186 | 1074.032 | 360.456 | 138.771 | 343.129 | 138.771 | 175.2454 | 2.117011 | 1948.305 |
| 18.51983 | 1182.28  | 468.97  | 149.281 | 389.263 | 228.039 | 311.9507 | 4.48972  | 1438.063 |
| 18.51983 | 1182.28  | 468.97  | 149.281 | 389.263 | 228.039 | 311.9507 | 4.48972  | 1438.063 |
| 18.51983 | 1182.28  | 468.97  | 149.281 | 389.263 | 228.039 | 311.9507 | 4.48972  | 1438.063 |
| 0.851703 | 1355.105 | 492.748 | 223.249 | 415.345 | 223.249 | 344.9812 | 0.403961 | 1862.702 |
| 0.851703 | 1355.105 | 492.748 | 223.249 | 415.345 | 223.249 | 344.9812 | 0.403961 | 1862.702 |
| 0.437352 | 1192.216 | 424.53  | 193.203 | 358.705 | 193.203 | 346.348  | 3.354737 | 2021.434 |
| 0.437352 | 1192.216 | 424.53  | 193.203 | 358.705 | 193.203 | 346.348  | 3.354737 | 2021.434 |
| 0.437352 | 1192.216 | 424.53  | 193.203 | 358.705 | 193.203 | 346.348  | 3.354737 | 2021.434 |
| 19.98208 | 1282.251 | 428.942 | 199.648 | 282.135 | 301.821 | 261.3956 | 2.788267 | 1863.578 |
| 19.98208 | 1282.251 | 428.942 | 199.648 | 282.135 | 301.821 | 261.3956 | 2.788267 | 1863.578 |
| 1.222846 | 1081.288 | 481.4   | 110.162 | 440.515 | 110.162 | 138.7071 | 2.50683  | 1815.574 |
| 1.222846 | 1081.288 | 481.4   | 110.162 | 440.515 | 110.162 | 138.7071 | 2.50683  | 1815.574 |
| 1.222846 | 1081.288 | 481.4   | 110.162 | 440.515 | 110.162 | 138.7071 | 2.50683  | 1815.574 |
| 1.222846 | 1081.288 | 481.4   | 110.162 | 440.515 | 110.162 | 138.7071 | 2.50683  | 1815.574 |
| 1.222846 | 1081.288 | 481.4   | 110.162 | 440.515 | 110.162 | 138.7071 | 2.50683  | 1815.574 |
| 1.222846 | 1081.288 | 481.4   | 110.162 | 440.515 | 110.162 | 138.7071 | 2.50683  | 1815.574 |
| 1.222846 | 1081.288 | 481.4   | 110.162 | 440.515 | 110.162 | 138.7071 | 2.50683  | 1815.574 |
| 1.222846 | 1081.288 | 481.4   | 110.162 | 440.515 | 110.162 | 138.7071 | 2.50683  | 1815.574 |
| -1.68034 | 1121.098 | 416.359 | 203.313 | 357.376 | 203.313 | 444.7566 | 3.02755  | 1895.277 |
| 18.31974 | 1205.787 | 450.19  | 167.266 | 347.842 | 213.155 | 342.0194 | 5.998885 | 1432.308 |
| 1.34567  | 1036.298 | 416.576 | 125.763 | 351.163 | 125.763 | 98.39349 | 4.764332 | 1521.834 |
| 1.34567  | 1036.298 | 416.576 | 125.763 | 351.163 | 125.763 | 98.39349 | 4.764332 | 1521.834 |
| 1.34567  | 1036.298 | 416.576 | 125.763 | 351.163 | 125.763 | 98.39349 | 4.764332 | 1521.834 |
| 1.34567  | 1036.298 | 416.576 | 125.763 | 351.163 | 125.763 | 98.39349 | 4.764332 | 1521.834 |
| 1.34567  | 1036.298 | 416.576 | 125.763 | 351.163 | 125.763 | 98.39349 | 4.764332 | 1521.834 |
| 1.620286 | 1046.792 | 412.833 | 141.234 | 346.007 | 141.234 | 82.30245 | 4.124621 | 1880.85  |
| 1.620286 | 1046.792 | 412.833 | 141.234 | 346.007 | 141.234 | 82.30245 | 4.124621 | 1880.85  |
| 0.520489 | 1214.764 | 431.146 | 202.207 | 358.102 | 202.207 | 314.7635 | 8.712111 | 2402.854 |
| 0.520489 | 1214.764 | 431.146 | 202.207 | 358.102 | 202.207 | 314.7635 | 8.712111 | 2402.854 |
| 0.520489 | 1214.764 | 431.146 | 202.207 | 358.102 | 202.207 | 314.7635 | 8.712111 | 2402.854 |
| -0.31168 | 1068.237 | 390.363 | 151.73  | 337.921 | 151.73  | 349.5407 | 3.111368 | 1662.415 |
| 10.40388 | 1050.159 | 366.522 | 140.553 | 358.447 | 160.446 | 257.2712 | 12.69096 | 821.2842 |
| 0.816011 | 1260.301 | 478.654 | 184.986 | 452.367 | 184.986 | 311.8525 | 9.304274 | 2253.092 |
| 1.28983  | 1198.578 | 501.065 | 158.017 | 491.325 | 158.017 | 83.46487 | 4.532743 | 1482.57  |
| 18.06966 | 1187.626 | 460.407 | 120.673 | 370.06  | 252.737 | 353.7827 | 1.677322 | 1845.688 |
| 18.06966 | 1187.626 | 460.407 | 120.673 | 370.06  | 252.737 | 353.7827 | 1.677322 | 1845.688 |
| 18.06966 | 1187.626 | 460.407 | 120.673 | 370.06  | 252.737 | 353.7827 | 1.677322 | 1845.688 |
| 18.06966 | 1187.626 | 460.407 | 120.673 | 370.06  | 252.737 | 353.7827 | 1.677322 | 1845.688 |
| 18.06966 | 1187.626 | 460.407 | 120.673 | 370.06  | 252.737 | 353.7827 | 1.677322 | 1845.688 |
| 1.193769 | 1313.203 | 540.484 | 182.942 | 510.422 | 182.942 | 353.818  | 9.800788 | 2414.645 |
| 1.584154 | 1113.703 | 482.577 | 139.954 | 429.346 | 139.954 | 256.7606 | 3.657492 | 1909.23  |
| 1.584154 | 1113.703 | 482.577 | 139.954 | 429.346 | 139.954 | 256.7606 | 3.657492 | 1909.23  |

Table S2 - Anonymized database

|          |          |         |         |         |         |          |          |          |
|----------|----------|---------|---------|---------|---------|----------|----------|----------|
| 1.14756  | 1229.533 | 480.647 | 158.43  | 449.146 | 158.43  | 320.661  | 3.05985  | 1967.903 |
| 0.278016 | 1231.077 | 450.28  | 214.251 | 388.43  | 214.251 | 350.8546 | 4.056374 | 2002.568 |
| 1.379049 | 1054.364 | 415.073 | 148.135 | 389.473 | 148.135 | 106.7864 | 2.553069 | 1817.755 |
| 1.379049 | 1054.364 | 415.073 | 148.135 | 389.473 | 148.135 | 106.7864 | 2.553069 | 1817.755 |
| 0.715363 | 1169.376 | 440.42  | 164.323 | 432.232 | 164.323 | 214.8781 | 5.50378  | 1491.958 |
| 16.66705 | 1638.333 | 620.346 | 275.441 | 543.848 | 283.835 | 581.6044 | 5.521491 | 1480.118 |
| 16.66705 | 1638.333 | 620.346 | 275.441 | 543.848 | 283.835 | 581.6044 | 5.521491 | 1480.118 |
| 16.66705 | 1638.333 | 620.346 | 275.441 | 543.848 | 283.835 | 581.6044 | 5.521491 | 1480.118 |
| 1.154319 | 1069.139 | 395.328 | 155.942 | 377.332 | 155.942 | 99.84711 | 3.078826 | 1649.392 |
| 1.154319 | 1069.139 | 395.328 | 155.942 | 377.332 | 155.942 | 99.84711 | 3.078826 | 1649.392 |
| 17.83516 | 1263.249 | 455.287 | 161.919 | 339.602 | 231.219 | 368.9091 | 0.768818 | 1715.272 |
| 17.83516 | 1263.249 | 455.287 | 161.919 | 339.602 | 231.219 | 368.9091 | 0.768818 | 1715.272 |
| 1.288907 | 1101.384 | 521.317 | 112.221 | 487.129 | 112.221 | 134.9252 | 5.741443 | 1696.724 |
| 8.643956 | 1438.028 | 548.298 | 229.766 | 513.314 | 249.796 | 663.8906 | 3.372374 | 2187.516 |
| 0.913973 | 1173.967 | 450.496 | 167.028 | 431.8   | 167.028 | 252.7432 | 7.030299 | 2220.283 |
| 0.913973 | 1173.967 | 450.496 | 167.028 | 431.8   | 167.028 | 252.7432 | 7.030299 | 2220.283 |
| 0.913973 | 1173.967 | 450.496 | 167.028 | 431.8   | 167.028 | 252.7432 | 7.030299 | 2220.283 |
| 0.913973 | 1173.967 | 450.496 | 167.028 | 431.8   | 167.028 | 252.7432 | 7.030299 | 2220.283 |
| 0.913973 | 1173.967 | 450.496 | 167.028 | 431.8   | 167.028 | 252.7432 | 7.030299 | 2220.283 |
| 0.913973 | 1173.967 | 450.496 | 167.028 | 431.8   | 167.028 | 252.7432 | 7.030299 | 2220.283 |
| 0.913973 | 1173.967 | 450.496 | 167.028 | 431.8   | 167.028 | 252.7432 | 7.030299 | 2220.283 |
| 0.913973 | 1173.967 | 450.496 | 167.028 | 431.8   | 167.028 | 252.7432 | 7.030299 | 2220.283 |
| 0.913973 | 1173.967 | 450.496 | 167.028 | 431.8   | 167.028 | 252.7432 | 7.030299 | 2220.283 |
| 1.197742 | 1080.637 | 418.909 | 149.214 | 375.353 | 149.214 | 220.2656 | 6.243832 | 2323.249 |
| 1.689896 | 977.137  | 384.824 | 146.945 | 333.587 | 146.945 | 106.5691 | 4.151762 | 1547.465 |
| 1.689896 | 977.137  | 384.824 | 146.945 | 333.587 | 146.945 | 106.5691 | 4.151762 | 1547.465 |
| 1.689896 | 977.137  | 384.824 | 146.945 | 333.587 | 146.945 | 106.5691 | 4.151762 | 1547.465 |
| 1.689896 | 977.137  | 384.824 | 146.945 | 333.587 | 146.945 | 106.5691 | 4.151762 | 1547.465 |
| 10.41302 | 1107.858 | 399.833 | 144.454 | 360.669 | 180.515 | 442.1107 | 8.673082 | 1871.338 |
| 10.41302 | 1107.858 | 399.833 | 144.454 | 360.669 | 180.515 | 442.1107 | 8.673082 | 1871.338 |
| 10.41302 | 1107.858 | 399.833 | 144.454 | 360.669 | 180.515 | 442.1107 | 8.673082 | 1871.338 |
| 10.41302 | 1107.858 | 399.833 | 144.454 | 360.669 | 180.515 | 442.1107 | 8.673082 | 1871.338 |
| 17.96497 | 1217.182 | 430.052 | 155.312 | 302.152 | 227.337 | 330.8731 | 0.217345 | 1789.407 |
| 17.96497 | 1217.182 | 430.052 | 155.312 | 302.152 | 227.337 | 330.8731 | 0.217345 | 1789.407 |
| 1.542247 | 1064.831 | 411.141 | 151.292 | 388.665 | 151.292 | 75.6599  | 0.628604 | 1800.512 |
| 1.542247 | 1064.831 | 411.141 | 151.292 | 388.665 | 151.292 | 75.6599  | 0.628604 | 1800.512 |
| 1.601962 | 1072.172 | 436.875 | 137.997 | 384.836 | 137.997 | 218.33   | 14.04217 | 963.5971 |
| 1.601962 | 1072.172 | 436.875 | 137.997 | 384.836 | 137.997 | 218.33   | 14.04217 | 963.5971 |
| 1.601962 | 1072.172 | 436.875 | 137.997 | 384.836 | 137.997 | 218.33   | 14.04217 | 963.5971 |
| 1.601962 | 1072.172 | 436.875 | 137.997 | 384.836 | 137.997 | 218.33   | 14.04217 | 963.5971 |
| -1.4519  | 1086.461 | 453.6   | 123.568 | 373.129 | 150.863 | 340.6455 | 9.196588 | 2278.729 |
| -1.4519  | 1086.461 | 453.6   | 123.568 | 373.129 | 150.863 | 340.6455 | 9.196588 | 2278.729 |
| -1.4519  | 1086.461 | 453.6   | 123.568 | 373.129 | 150.863 | 340.6455 | 9.196588 | 2278.729 |
| 0.520451 | 1256.469 | 464.044 | 198.199 | 401.5   | 198.199 | 341.0001 | 4.046354 | 2112.621 |
| 0.082527 | 1290.431 | 569.334 | 129.365 | 564.797 | 129.365 | 222.9399 | 2.51953  | 2007.912 |
| 0.082527 | 1290.431 | 569.334 | 129.365 | 564.797 | 129.365 | 222.9399 | 2.51953  | 2007.912 |
| 0.082527 | 1290.431 | 569.334 | 129.365 | 564.797 | 129.365 | 222.9399 | 2.51953  | 2007.912 |
| 0.082527 | 1290.431 | 569.334 | 129.365 | 564.797 | 129.365 | 222.9399 | 2.51953  | 2007.912 |
| 10.15296 | 1559.359 | 468.632 | 281.171 | 378.371 | 345.994 | 358.2456 | 1.694529 | 1918.018 |
| 12.0029  | 1615.592 | 586.466 | 280.469 | 478.007 | 402.27  | 118.0156 | 12.89384 | 1712.243 |
| 3.334753 | 1820.554 | 648.36  | 310.079 | 606.007 | 375.933 | 69.08638 | 7.388803 | 1751.463 |

Table S2 - Anonymized database

|          |          |         |         |         |         |          |          |          |
|----------|----------|---------|---------|---------|---------|----------|----------|----------|
| 3.674995 | 1796.955 | 636.808 | 315.92  | 562.572 | 388.759 | 51.4521  | 2.942134 | 1946.844 |
| 20.29861 | 1505.293 | 539.816 | 263.28  | 415.787 | 304.279 | 381.3399 | 16.77052 | 2831.876 |
| 11.25932 | 1786.514 | 679.295 | 296.975 | 564.399 | 398.125 | 181.7777 | 3.736843 | 1920.678 |
| 3.453907 | 1686.738 | 545.082 | 331.226 | 437.584 | 402.128 | 119.4134 | 0.113889 | 1846.314 |
| 4.866038 | 1797.357 | 640.779 | 337.3   | 454.125 | 442.061 | 34.27692 | 1.662563 | 1977.799 |
| 8.429346 | 1519.842 | 463.864 | 279.723 | 375.305 | 336.653 | 365.6075 | 12.60653 | 1907.473 |
| 8.484687 | 1566.905 | 478.142 | 281.648 | 399.884 | 348.375 | 344.1273 | 8.791059 | 2300.894 |
| -0.31727 | 1895.87  | 656.12  | 306.828 | 585.782 | 315.603 | 362.4643 | 6.86713  | 1628.494 |
| -0.31727 | 1895.87  | 656.12  | 306.828 | 585.782 | 315.603 | 362.4643 | 6.86713  | 1628.494 |
| 2.233962 | 1737.543 | 673.737 | 283.023 | 600.086 | 358.252 | 270.7938 | 28.19601 | 3349.484 |
| 2.233962 | 1737.543 | 673.737 | 283.023 | 600.086 | 358.252 | 270.7938 | 28.19601 | 3349.484 |
| 10.12959 | 1638.506 | 522.081 | 270.148 | 522.081 | 357.382 | 313.4054 | 11.75299 | 1418.11  |
| -0.1882  | 1614.638 | 664.352 | 245.667 | 619.388 | 295.482 | 380.8375 | 4.070759 | 1519.568 |
| 2.621714 | 1723.602 | 662.333 | 291.47  | 629.761 | 353.159 | 208.766  | 6.265687 | 1832.687 |
| 2.621714 | 1723.602 | 662.333 | 291.47  | 629.761 | 353.159 | 208.766  | 6.265687 | 1832.687 |
| 7.75183  | 1744.123 | 686.263 | 290.613 | 624.057 | 366.899 | 96.70383 | 4.908966 | 1559.2   |
| 2.793099 | 1680.525 | 640.494 | 253.498 | 580.599 | 350.649 | 214.722  | 3.836843 | 1629.528 |
| 3.38656  | 1671.116 | 534.958 | 296.157 | 388.283 | 341.02  | 305.1122 | 1.098116 | 1929.252 |
| 3.702681 | 1741.133 | 640.872 | 271.713 | 560.119 | 436.985 | 100.9892 | 8.350395 | 2369.271 |
| 0.446736 | 2007.881 | 732.491 | 340.365 | 659.08  | 457.163 | 311.8601 | 0.561861 | 1807.235 |
| 2.98006  | 1712.541 | 647.985 | 294.939 | 584.4   | 364.177 | 122.264  | 6.164512 | 2312.941 |
| 3.170423 | 1667.742 | 687.202 | 246.772 | 575.913 | 321.377 | 125.6447 | 1.431671 | 1880.36  |
| 12.67234 | 1722.314 | 565.458 | 330.413 | 405.641 | 440.329 | 54.76521 | 5.173323 | 1836.214 |
| 11.38651 | 1863.632 | 727.8   | 297.391 | 628.303 | 411.921 | 119.6027 | 1.839919 | 1925.151 |
| 3.202247 | 1743.849 | 671.584 | 293.122 | 576.912 | 397.75  | 146.1161 | 0.880539 | 1819.605 |
| 3.204835 | 1834.523 | 698.969 | 287.86  | 616.796 | 385.032 | 106.5939 | 5.842232 | 1397.98  |
| 3.204835 | 1834.523 | 698.969 | 287.86  | 616.796 | 385.032 | 106.5939 | 5.842232 | 1397.98  |
| -2.55621 | 1415.638 | 491.994 | 259.568 | 371.713 | 269.072 | 398.2895 | 1.172895 | 1606.425 |
| 3.186462 | 1749.97  | 683.881 | 258.535 | 628.119 | 343.95  | 174.5617 | 0.468577 | 1840.082 |
| 3.186462 | 1749.97  | 683.881 | 258.535 | 628.119 | 343.95  | 174.5617 | 0.468577 | 1840.082 |
| -2.46074 | 1373.009 | 422.337 | 249.857 | 365.846 | 249.857 | 396.1142 | 1.802708 | 1720.296 |
| -2.46074 | 1373.009 | 422.337 | 249.857 | 365.846 | 249.857 | 396.1142 | 1.802708 | 1720.296 |
| -1.24902 | 1802.949 | 615.544 | 299.283 | 536.595 | 299.283 | 367.5201 | 5.641701 | 2122.695 |
| 4.306681 | 1669.886 | 546.443 | 290.398 | 461.013 | 447.037 | 28.46955 | 0.679182 | 1846.094 |
| 3.654016 | 1808.103 | 609.406 | 326.03  | 600.122 | 405.004 | 69.53417 | 3.856232 | 1601.942 |
| 1.36717  | 1631.658 | 686.213 | 240.917 | 561.508 | 319.077 | 161.0517 | 3.782925 | 1557.11  |
| 2.728368 | 1578.184 | 496.347 | 288.66  | 353.428 | 329.864 | 410.7733 | 5.040017 | 1900.799 |
| 2.728368 | 1578.184 | 496.347 | 288.66  | 353.428 | 329.864 | 410.7733 | 5.040017 | 1900.799 |
| 2.728368 | 1578.184 | 496.347 | 288.66  | 353.428 | 329.864 | 410.7733 | 5.040017 | 1900.799 |
| 2.728368 | 1578.184 | 496.347 | 288.66  | 353.428 | 329.864 | 410.7733 | 5.040017 | 1900.799 |
| 0.537049 | 1707.55  | 650.433 | 286.152 | 619.503 | 305.673 | 365.2663 | 8.606683 | 2248.623 |
| 0.537049 | 1707.55  | 650.433 | 286.152 | 619.503 | 305.673 | 365.2663 | 8.606683 | 2248.623 |
| 2.99339  | 1736.133 | 670.84  | 291.367 | 566.046 | 393.127 | 178.8689 | 3.350492 | 1871.85  |
| 3.09322  | 1645.044 | 511.449 | 294.596 | 395.47  | 329.005 | 311.3914 | 3.386594 | 1645.39  |
| -1.55404 | 1655.204 | 707.488 | 235.803 | 692.561 | 285.481 | 489.7062 | 3.59755  | 1702.217 |
| 10.09323 | 1722.892 | 566.342 | 274.754 | 566.342 | 353.188 | 272.5588 | 7.12005  | 2301.675 |
| 10.09323 | 1722.892 | 566.342 | 274.754 | 566.342 | 353.188 | 272.5588 | 7.12005  | 2301.675 |
| -0.41771 | 1550.417 | 578.046 | 232.753 | 534.165 | 284.639 | 200.8394 | 0.870624 | 920.6934 |
| 9.714725 | 2126.397 | 975.95  | 282.783 | 975.95  | 390.961 | 197.695  | 5.642335 | 2223.441 |
| 9.714725 | 2126.397 | 975.95  | 282.783 | 975.95  | 390.961 | 197.695  | 5.642335 | 2223.441 |

Table S2 - Anonymized database

|          |          |         |         |         |         |          |          |          |
|----------|----------|---------|---------|---------|---------|----------|----------|----------|
| 9.714725 | 2126.397 | 975.95  | 282.783 | 975.95  | 390.961 | 197.695  | 5.642335 | 2223.441 |
| -2.13416 | 1758.907 | 557.63  | 287.94  | 533.806 | 287.94  | 578.7245 | 15.7686  | 1843.488 |
| 0.940978 | 1742.635 | 716.934 | 292.411 | 568.432 | 345.087 | 306.2375 | 0.923596 | 1703.135 |
| 1.108027 | 1624.28  | 625.868 | 268.403 | 625.868 | 274.827 | 369.4496 | 3.147714 | 1759.718 |
| 1.108027 | 1624.28  | 625.868 | 268.403 | 625.868 | 274.827 | 369.4496 | 3.147714 | 1759.718 |
| 1.108027 | 1624.28  | 625.868 | 268.403 | 625.868 | 274.827 | 369.4496 | 3.147714 | 1759.718 |
| 3.361176 | 1757.985 | 700.142 | 264.277 | 591.576 | 417.158 | 130.5054 | 1.396612 | 1963.494 |
| 11.64161 | 1855.697 | 761.546 | 284.142 | 679.693 | 395.206 | 119.5475 | 4.079675 | 1512.646 |
| 11.64161 | 1855.697 | 761.546 | 284.142 | 679.693 | 395.206 | 119.5475 | 4.079675 | 1512.646 |
| 11.64161 | 1855.697 | 761.546 | 284.142 | 679.693 | 395.206 | 119.5475 | 4.079675 | 1512.646 |
| 1.068066 | 1644.372 | 676.736 | 255.604 | 540.952 | 328.193 | 187.6075 | 5.691956 | 1343.706 |
| 1.068066 | 1644.372 | 676.736 | 255.604 | 540.952 | 328.193 | 187.6075 | 5.691956 | 1343.706 |
| 1.495863 | 1907.282 | 690.445 | 334.487 | 517.025 | 436.375 | 148.2937 | 1.099489 | 1699.062 |
| 3.165027 | 1786.812 | 722.962 | 244.536 | 616.051 | 363.824 | 176.3364 | 1.888108 | 1919.367 |
| 3.165027 | 1786.812 | 722.962 | 244.536 | 616.051 | 363.824 | 176.3364 | 1.888108 | 1919.367 |
| 2.045709 | 1716.124 | 701.845 | 242.792 | 614.784 | 306.751 | 288.6531 | 13.5198  | 1038.656 |
| 2.045709 | 1716.124 | 701.845 | 242.792 | 614.784 | 306.751 | 288.6531 | 13.5198  | 1038.656 |
| 1.517253 | 1619.106 | 647.824 | 248.946 | 647.824 | 267.039 | 330.4612 | 5.314943 | 2050.618 |
| 1.517253 | 1619.106 | 647.824 | 248.946 | 647.824 | 267.039 | 330.4612 | 5.314943 | 2050.618 |
| 12.39011 | 1694.763 | 534.732 | 335.899 | 398.526 | 429.408 | 83.90097 | 2.566    | 2002.437 |
| 12.39011 | 1694.763 | 534.732 | 335.899 | 398.526 | 429.408 | 83.90097 | 2.566    | 2002.437 |
| 12.39011 | 1694.763 | 534.732 | 335.899 | 398.526 | 429.408 | 83.90097 | 2.566    | 2002.437 |
| 2.923692 | 1750.604 | 725.927 | 281.575 | 644.04  | 339.092 | 108.9301 | 0.270718 | 1853.959 |
| 2.923692 | 1750.604 | 725.927 | 281.575 | 644.04  | 339.092 | 108.9301 | 0.270718 | 1853.959 |
| -2.32548 | 1444.681 | 448.344 | 270.455 | 395.367 | 270.455 | 330.781  | 0.599844 | 1782.226 |
| -2.32548 | 1444.681 | 448.344 | 270.455 | 395.367 | 270.455 | 330.781  | 0.599844 | 1782.226 |
| 2.309527 | 1759.552 | 665.196 | 297.839 | 608.559 | 382.53  | 231.4455 | 5.869617 | 2064.344 |
| 2.309527 | 1759.552 | 665.196 | 297.839 | 608.559 | 382.53  | 231.4455 | 5.869617 | 2064.344 |
| -0.98347 | 1482.361 | 509.542 | 255.363 | 437.681 | 289.916 | 443.7068 | 24.45277 | 9.84658  |
| 2.658973 | 1857.823 | 804.853 | 282.122 | 769.688 | 368.375 | 163.24   | 0.627206 | 1907.193 |
| -2.0658  | 1737.211 | 552.653 | 308.083 | 492.523 | 308.083 | 559.32   | 6.887537 | 1658.008 |
| -2.0658  | 1737.211 | 552.653 | 308.083 | 492.523 | 308.083 | 559.32   | 6.887537 | 1658.008 |
| 2.775    | 1706.642 | 622.925 | 269.626 | 594.823 | 367.238 | 151.6085 | 3.044361 | 1695.477 |
| 2.775    | 1706.642 | 622.925 | 269.626 | 594.823 | 367.238 | 151.6085 | 3.044361 | 1695.477 |
| 9.765038 | 1726.196 | 579.005 | 315.421 | 579.005 | 318.305 | 367.2032 | 9.372241 | 1854.878 |
| 9.765038 | 1726.196 | 579.005 | 315.421 | 579.005 | 318.305 | 367.2032 | 9.372241 | 1854.878 |
| 9.765038 | 1726.196 | 579.005 | 315.421 | 579.005 | 318.305 | 367.2032 | 9.372241 | 1854.878 |
| 9.765038 | 1726.196 | 579.005 | 315.421 | 579.005 | 318.305 | 367.2032 | 9.372241 | 1854.878 |
| 2.92322  | 1869.494 | 701.625 | 331.039 | 646.369 | 378.381 | 118.1115 | 1.501855 | 1862.66  |
| 2.739203 | 1760.081 | 718.746 | 280.373 | 654.203 | 347.181 | 162.8161 | 1.964231 | 1741.297 |
| -0.03574 | 1728.667 | 592.558 | 281.159 | 459.295 | 297.488 | 321.0894 | 7.302571 | 1338.034 |
| 3.270945 | 1667.127 | 534.067 | 293.901 | 424.25  | 335.156 | 334.5434 | 9.641643 | 1425.432 |
| 3.270945 | 1667.127 | 534.067 | 293.901 | 424.25  | 335.156 | 334.5434 | 9.641643 | 1425.432 |
| 2.861005 | 1876.506 | 770.783 | 302.223 | 712.595 | 376.309 | 131.5466 | 7.098525 | 1302.395 |
| 2.861005 | 1876.506 | 770.783 | 302.223 | 712.595 | 376.309 | 131.5466 | 7.098525 | 1302.395 |
| -2.66538 | 1472.877 | 466.147 | 269.666 | 425.297 | 269.666 | 385.9416 | 16.94996 | 446.4642 |
| -2.66538 | 1472.877 | 466.147 | 269.666 | 425.297 | 269.666 | 385.9416 | 16.94996 | 446.4642 |
| -2.66538 | 1472.877 | 466.147 | 269.666 | 425.297 | 269.666 | 385.9416 | 16.94996 | 446.4642 |
| 3.254396 | 1940.243 | 834.343 | 252.329 | 723.289 | 400.305 | 297.4856 | 4.78008  | 2179.6   |
| 3.254396 | 1940.243 | 834.343 | 252.329 | 723.289 | 400.305 | 297.4856 | 4.78008  | 2179.6   |

Table S2 - Anonymized database

|          |          |         |         |         |         |          |          |          |
|----------|----------|---------|---------|---------|---------|----------|----------|----------|
| -1.80219 | 1829.322 | 673.068 | 270.259 | 598.688 | 295.698 | 425.881  | 16.28463 | 2612.849 |
| -1.80219 | 1829.322 | 673.068 | 270.259 | 598.688 | 295.698 | 425.881  | 16.28463 | 2612.849 |
| 3.191758 | 1749.745 | 600.434 | 315.678 | 581.92  | 364.259 | 71.10771 | 0.571329 | 1809.155 |
| 3.191758 | 1749.745 | 600.434 | 315.678 | 581.92  | 364.259 | 71.10771 | 0.571329 | 1809.155 |
| 3.191758 | 1749.745 | 600.434 | 315.678 | 581.92  | 364.259 | 71.10771 | 0.571329 | 1809.155 |
| 3.191758 | 1749.745 | 600.434 | 315.678 | 581.92  | 364.259 | 71.10771 | 0.571329 | 1809.155 |
| 3.673863 | 1689.434 | 533.232 | 297.784 | 533.232 | 348.849 | 353.818  | 9.800788 | 2414.645 |
| 3.03844  | 1928.127 | 868.941 | 263.871 | 768.761 | 345.561 | 115.4449 | 3.68327  | 1941.253 |
| 3.03844  | 1928.127 | 868.941 | 263.871 | 768.761 | 345.561 | 115.4449 | 3.68327  | 1941.253 |
| 3.019214 | 1815.915 | 658.626 | 332.458 | 596.949 | 373.76  | 107.388  | 1.836803 | 1754.523 |
| 3.019214 | 1815.915 | 658.626 | 332.458 | 596.949 | 373.76  | 107.388  | 1.836803 | 1754.523 |
| 3.019214 | 1815.915 | 658.626 | 332.458 | 596.949 | 373.76  | 107.388  | 1.836803 | 1754.523 |
| 3.019214 | 1815.915 | 658.626 | 332.458 | 596.949 | 373.76  | 107.388  | 1.836803 | 1754.523 |
| 11.56054 | 1731.735 | 653     | 289.524 | 551.408 | 392.258 | 133.692  | 0.928783 | 1841.605 |
| 3.019214 | 1815.915 | 658.626 | 332.458 | 596.949 | 373.76  | 62.67819 | 6.543175 | 1760.891 |
| 3.019214 | 1815.915 | 658.626 | 332.458 | 596.949 | 373.76  | 62.67819 | 6.543175 | 1760.891 |
| 7.99656  | 1601.338 | 515.562 | 279.154 | 513.384 | 337.386 | 388.4849 | 0.546904 | 1860.972 |
| 7.99656  | 1601.338 | 515.562 | 279.154 | 513.384 | 337.386 | 388.4849 | 0.546904 | 1860.972 |
| 0.693659 | 1641.955 | 674.39  | 234.111 | 617.163 | 294.82  | 211.2159 | 8.984717 | 1305.867 |
| 0.693659 | 1641.955 | 674.39  | 234.111 | 617.163 | 294.82  | 211.2159 | 8.984717 | 1305.867 |
| 0.693659 | 1641.955 | 674.39  | 234.111 | 617.163 | 294.82  | 211.2159 | 8.984717 | 1305.867 |
| 0.057346 | 1641.624 | 688.454 | 233.49  | 652.575 | 304.641 | 423.5338 | 15.46822 | 1331.014 |
| -2.73457 | 1690.79  | 575.959 | 263.325 | 529.174 | 263.325 | 602.6755 | 10.18564 | 2336.094 |
| 3.269582 | 1761.512 | 673.087 | 252.466 | 580.927 | 351.081 | 186.2722 | 14.29552 | 2568.046 |
| 3.269582 | 1761.512 | 673.087 | 252.466 | 580.927 | 351.081 | 186.2722 | 14.29552 | 2568.046 |
| 10.22724 | 1567.866 | 501.406 | 274.268 | 463.839 | 342.907 | 344.3909 | 7.572275 | 1738.915 |
| 10.22724 | 1567.866 | 501.406 | 274.268 | 463.839 | 342.907 | 344.3909 | 7.572275 | 1738.915 |
| 10.22724 | 1567.866 | 501.406 | 274.268 | 463.839 | 342.907 | 344.3909 | 7.572275 | 1738.915 |
| 0.655505 | 1798.683 | 851.344 | 229.906 | 796.802 | 302.237 | 230.9364 | 4.226843 | 2008.737 |
| 0.655505 | 1798.683 | 851.344 | 229.906 | 796.802 | 302.237 | 230.9364 | 4.226843 | 2008.737 |
| 0.655505 | 1798.683 | 851.344 | 229.906 | 796.802 | 302.237 | 230.9364 | 4.226843 | 2008.737 |
| 0.655505 | 1798.683 | 851.344 | 229.906 | 796.802 | 302.237 | 230.9364 | 4.226843 | 2008.737 |
| 12.79818 | 1775.993 | 583.92  | 319.59  | 490.019 | 439.791 | 91.46474 | 1.612379 | 1995.601 |
| 12.79818 | 1775.993 | 583.92  | 319.59  | 490.019 | 439.791 | 91.46474 | 1.612379 | 1995.601 |
| 12.79818 | 1775.993 | 583.92  | 319.59  | 490.019 | 439.791 | 91.46474 | 1.612379 | 1995.601 |
| 7.493527 | 1732.353 | 675.805 | 294.739 | 618.215 | 369.921 | 105.9056 | 4.341443 | 1633.646 |
| 7.493527 | 1732.353 | 675.805 | 294.739 | 618.215 | 369.921 | 105.9056 | 4.341443 | 1633.646 |
| 7.493527 | 1732.353 | 675.805 | 294.739 | 618.215 | 369.921 | 105.9056 | 4.341443 | 1633.646 |
| 3.539126 | 1680.951 | 554.388 | 288.569 | 403.414 | 299.121 | 317.2497 | 11.81392 | 959.2725 |
| 3.539126 | 1680.951 | 554.388 | 288.569 | 403.414 | 299.121 | 317.2497 | 11.81392 | 959.2725 |
| 3.539126 | 1680.951 | 554.388 | 288.569 | 403.414 | 299.121 | 317.2497 | 11.81392 | 959.2725 |
| 10.2139  | 1949.674 | 754.498 | 311.599 | 738.447 | 399.291 | 126.3232 | 4.08183  | 1849.596 |
| 10.2139  | 1949.674 | 754.498 | 311.599 | 738.447 | 399.291 | 126.3232 | 4.08183  | 1849.596 |
| 10.11392 | 1595.562 | 514.394 | 277.919 | 514.394 | 340.584 | 327.824  | 10.42236 | 2086.291 |
| 10.11392 | 1595.562 | 514.394 | 277.919 | 514.394 | 340.584 | 327.824  | 10.42236 | 2086.291 |
| 10.11392 | 1595.562 | 514.394 | 277.919 | 514.394 | 340.584 | 327.824  | 10.42236 | 2086.291 |
| 10.11392 | 1595.562 | 514.394 | 277.919 | 514.394 | 340.584 | 327.824  | 10.42236 | 2086.291 |
| 10.11392 | 1595.562 | 514.394 | 277.919 | 514.394 | 340.584 | 327.824  | 10.42236 | 2086.291 |
| 1.527967 | 1593.369 | 653.504 | 239.989 | 652.947 | 263.645 | 222.4361 | 2.733181 | 1472.043 |
| 1.527967 | 1593.369 | 653.504 | 239.989 | 652.947 | 263.645 | 222.4361 | 2.733181 | 1472.043 |

Table S2 - Anonymized database

|          |          |         |         |         |         |          |          |          |
|----------|----------|---------|---------|---------|---------|----------|----------|----------|
| 2.515495 | 1766.287 | 753.767 | 272.141 | 674.837 | 333.336 | 147.7344 | 2.213931 | 1994.002 |
| 2.515495 | 1766.287 | 753.767 | 272.141 | 674.837 | 333.336 | 147.7344 | 2.213931 | 1994.002 |
| 2.515495 | 1766.287 | 753.767 | 272.141 | 674.837 | 333.336 | 147.7344 | 2.213931 | 1994.002 |
| 2.994984 | 1636.069 | 511.474 | 292.264 | 370.066 | 332.285 | 363.2772 | 6.386463 | 2184.072 |
| 2.994984 | 1636.069 | 511.474 | 292.264 | 370.066 | 332.285 | 363.2772 | 6.386463 | 2184.072 |
| 2.994984 | 1636.069 | 511.474 | 292.264 | 370.066 | 332.285 | 363.2772 | 6.386463 | 2184.072 |
| -0.8633  | 1752.065 | 718.955 | 260.487 | 570.262 | 362.782 | 302.8407 | 5.463532 | 1223.193 |
| -0.8633  | 1752.065 | 718.955 | 260.487 | 570.262 | 362.782 | 302.8407 | 5.463532 | 1223.193 |
| 3.082264 | 1841.716 | 765.463 | 299.75  | 657.881 | 389.15  | 187.7079 | 2.024981 | 2018.113 |
| 3.082264 | 1841.716 | 765.463 | 299.75  | 657.881 | 389.15  | 187.7079 | 2.024981 | 2018.113 |
| 3.082264 | 1841.716 | 765.463 | 299.75  | 657.881 | 389.15  | 187.7079 | 2.024981 | 2018.113 |
| 3.082264 | 1841.716 | 765.463 | 299.75  | 657.881 | 389.15  | 187.7079 | 2.024981 | 2018.113 |
| 3.082264 | 1841.716 | 765.463 | 299.75  | 657.881 | 389.15  | 187.7079 | 2.024981 | 2018.113 |
| -0.9291  | 1498.215 | 648.835 | 172.608 | 624.047 | 236.998 | 318.5292 | 13.84482 | 1524.968 |
| -0.9291  | 1498.215 | 648.835 | 172.608 | 624.047 | 236.998 | 318.5292 | 13.84482 | 1524.968 |
| -0.9291  | 1498.215 | 648.835 | 172.608 | 624.047 | 236.998 | 318.5292 | 13.84482 | 1524.968 |
| -0.9291  | 1498.215 | 648.835 | 172.608 | 624.047 | 236.998 | 318.5292 | 13.84482 | 1524.968 |
| 2.67878  | 1857.64  | 776.54  | 295.668 | 720.464 | 376.505 | 139.6398 | 0.460311 | 1805.588 |
| 2.67878  | 1857.64  | 776.54  | 295.668 | 720.464 | 376.505 | 139.6398 | 0.460311 | 1805.588 |
| 2.67878  | 1857.64  | 776.54  | 295.668 | 720.464 | 376.505 | 139.6398 | 0.460311 | 1805.588 |
| 2.67878  | 1857.64  | 776.54  | 295.668 | 720.464 | 376.505 | 139.6398 | 0.460311 | 1805.588 |
| 9.674176 | 1677.047 | 747.362 | 233.006 | 715.846 | 287.275 | 500.629  | 1.819382 | 1815.314 |
| 9.674176 | 1677.047 | 747.362 | 233.006 | 715.846 | 287.275 | 500.629  | 1.819382 | 1815.314 |
| 9.674176 | 1677.047 | 747.362 | 233.006 | 715.846 | 287.275 | 500.629  | 1.819382 | 1815.314 |
| 1.165121 | 1758.55  | 773.716 | 260.25  | 620.897 | 324.493 | 240.9818 | 2.35066  | 1953.851 |
| 1.165121 | 1758.55  | 773.716 | 260.25  | 620.897 | 324.493 | 240.9818 | 2.35066  | 1953.851 |
| 1.165121 | 1758.55  | 773.716 | 260.25  | 620.897 | 324.493 | 240.9818 | 2.35066  | 1953.851 |
| 1.165121 | 1758.55  | 773.716 | 260.25  | 620.897 | 324.493 | 240.9818 | 2.35066  | 1953.851 |
| 1.165121 | 1758.55  | 773.716 | 260.25  | 620.897 | 324.493 | 240.9818 | 2.35066  | 1953.851 |
| -3.14471 | 1338.751 | 410.37  | 265.597 | 404.62  | 271.411 | 482.474  | 3.426512 | 1754.312 |
| -3.14471 | 1338.751 | 410.37  | 265.597 | 404.62  | 271.411 | 482.474  | 3.426512 | 1754.312 |
| -3.14471 | 1338.751 | 410.37  | 265.597 | 404.62  | 271.411 | 482.474  | 3.426512 | 1754.312 |
| -3.14471 | 1338.751 | 410.37  | 265.597 | 404.62  | 271.411 | 482.474  | 3.426512 | 1754.312 |
| 3.284632 | 1766.656 | 726.812 | 251.065 | 605.233 | 355.336 | 142.9463 | 2.576109 | 1703.397 |
| 3.284632 | 1766.656 | 726.812 | 251.065 | 605.233 | 355.336 | 142.9463 | 2.576109 | 1703.397 |
| 3.284632 | 1766.656 | 726.812 | 251.065 | 605.233 | 355.336 | 142.9463 | 2.576109 | 1703.397 |
| 3.284632 | 1766.656 | 726.812 | 251.065 | 605.233 | 355.336 | 142.9463 | 2.576109 | 1703.397 |
| 10.3962  | 1656.738 | 540.026 | 292.239 | 499.881 | 349.794 | 288.6407 | 7.765498 | 2007.697 |
| 10.3962  | 1656.738 | 540.026 | 292.239 | 499.881 | 349.794 | 288.6407 | 7.765498 | 2007.697 |
| 10.3962  | 1656.738 | 540.026 | 292.239 | 499.881 | 349.794 | 288.6407 | 7.765498 | 2007.697 |
| 3.224808 | 1725.185 | 734.304 | 267.716 | 605.522 | 351.814 | 118.4804 | 4.569775 | 1687.026 |
| 3.224808 | 1725.185 | 734.304 | 267.716 | 605.522 | 351.814 | 118.4804 | 4.569775 | 1687.026 |
| 3.224808 | 1725.185 | 734.304 | 267.716 | 605.522 | 351.814 | 118.4804 | 4.569775 | 1687.026 |
| 2.844868 | 1735.468 | 596.5   | 332.033 | 537.819 | 364.987 | 99.84711 | 3.078826 | 1649.392 |
| 2.844868 | 1735.468 | 596.5   | 332.033 | 537.819 | 364.987 | 99.84711 | 3.078826 | 1649.392 |
| 2.844868 | 1735.468 | 596.5   | 332.033 | 537.819 | 364.987 | 99.84711 | 3.078826 | 1649.392 |
| -1.72355 | 1358.596 | 581.878 | 172.581 | 523.931 | 235.866 | 693.117  | 3.449864 | 1538.647 |
| -1.72355 | 1358.596 | 581.878 | 172.581 | 523.931 | 235.866 | 693.117  | 3.449864 | 1538.647 |
| -1.72355 | 1358.596 | 581.878 | 172.581 | 523.931 | 235.866 | 693.117  | 3.449864 | 1538.647 |

Table S2 - Anonymized database

|          |          |         |         |         |         |          |          |          |
|----------|----------|---------|---------|---------|---------|----------|----------|----------|
| -1.72355 | 1358.596 | 581.878 | 172.581 | 523.931 | 235.866 | 693.117  | 3.449864 | 1538.647 |
| 9.255143 | 1650.811 | 552.766 | 309.093 | 552.766 | 317.585 | 384.1146 | 8.195766 | 2390.127 |
| 9.255143 | 1650.811 | 552.766 | 309.093 | 552.766 | 317.585 | 384.1146 | 8.195766 | 2390.127 |
| 9.255143 | 1650.811 | 552.766 | 309.093 | 552.766 | 317.585 | 384.1146 | 8.195766 | 2390.127 |
| 9.255143 | 1650.811 | 552.766 | 309.093 | 552.766 | 317.585 | 384.1146 | 8.195766 | 2390.127 |
| 9.255143 | 1650.811 | 552.766 | 309.093 | 552.766 | 317.585 | 384.1146 | 8.195766 | 2390.127 |
| 9.255143 | 1650.811 | 552.766 | 309.093 | 552.766 | 317.585 | 384.1146 | 8.195766 | 2390.127 |
| 1.599203 | 1874.653 | 773.233 | 277.26  | 704.633 | 364.567 | 427.536  | 23.76717 | 3358.25  |
| 1.599203 | 1874.653 | 773.233 | 277.26  | 704.633 | 364.567 | 427.536  | 23.76717 | 3358.25  |
| 1.599203 | 1874.653 | 773.233 | 277.26  | 704.633 | 364.567 | 427.536  | 23.76717 | 3358.25  |
| 1.599203 | 1874.653 | 773.233 | 277.26  | 704.633 | 364.567 | 427.536  | 23.76717 | 3358.25  |
| 11.32852 | 1866.229 | 735.493 | 293.782 | 613.172 | 407.25  | 250.0854 | 6.824211 | 2129.41  |
| 11.32852 | 1866.229 | 735.493 | 293.782 | 613.172 | 407.25  | 250.0854 | 6.824211 | 2129.41  |
| 11.32852 | 1866.229 | 735.493 | 293.782 | 613.172 | 407.25  | 250.0854 | 6.824211 | 2129.41  |
| 11.32852 | 1866.229 | 735.493 | 293.782 | 613.172 | 407.25  | 250.0854 | 6.824211 | 2129.41  |
| 11.32852 | 1866.229 | 735.493 | 293.782 | 613.172 | 407.25  | 250.0854 | 6.824211 | 2129.41  |
| 11.32852 | 1866.229 | 735.493 | 293.782 | 613.172 | 407.25  | 250.0854 | 6.824211 | 2129.41  |
| 11.32852 | 1866.229 | 735.493 | 293.782 | 613.172 | 407.25  | 250.0854 | 6.824211 | 2129.41  |
| 11.32852 | 1866.229 | 735.493 | 293.782 | 613.172 | 407.25  | 250.0854 | 6.824211 | 2129.41  |
| 11.32852 | 1866.229 | 735.493 | 293.782 | 613.172 | 407.25  | 250.0854 | 6.824211 | 2129.41  |
| 11.32852 | 1866.229 | 735.493 | 293.782 | 613.172 | 407.25  | 250.0854 | 6.824211 | 2129.41  |
| 11.32852 | 1866.229 | 735.493 | 293.782 | 613.172 | 407.25  | 250.0854 | 6.824211 | 2129.41  |
| 3.078527 | 1709.982 | 751.458 | 244.056 | 643.587 | 367.179 | 191.9448 | 3.036096 | 2134.077 |
| 3.078527 | 1709.982 | 751.458 | 244.056 | 643.587 | 367.179 | 191.9448 | 3.036096 | 2134.077 |
| 3.078527 | 1709.982 | 751.458 | 244.056 | 643.587 | 367.179 | 191.9448 | 3.036096 | 2134.077 |
| 3.078527 | 1709.982 | 751.458 | 244.056 | 643.587 | 367.179 | 191.9448 | 3.036096 | 2134.077 |
| 0.977159 | 1594.237 | 664.744 | 241.42  | 613.571 | 280.445 | 344.4803 | 2.282428 | 1975.805 |
| 0.977159 | 1594.237 | 664.744 | 241.42  | 613.571 | 280.445 | 344.4803 | 2.282428 | 1975.805 |
| 0.977159 | 1594.237 | 664.744 | 241.42  | 613.571 | 280.445 | 344.4803 | 2.282428 | 1975.805 |
| 0.977159 | 1594.237 | 664.744 | 241.42  | 613.571 | 280.445 | 344.4803 | 2.282428 | 1975.805 |
| 0.977159 | 1594.237 | 664.744 | 241.42  | 613.571 | 280.445 | 344.4803 | 2.282428 | 1975.805 |
| 0.977159 | 1594.237 | 664.744 | 241.42  | 613.571 | 280.445 | 344.4803 | 2.282428 | 1975.805 |
| 0.977159 | 1594.237 | 664.744 | 241.42  | 613.571 | 280.445 | 344.4803 | 2.282428 | 1975.805 |
| 0.977159 | 1594.237 | 664.744 | 241.42  | 613.571 | 280.445 | 344.4803 | 2.282428 | 1975.805 |
| 0.977159 | 1594.237 | 664.744 | 241.42  | 613.571 | 280.445 | 344.4803 | 2.282428 | 1975.805 |
| 0.977159 | 1594.237 | 664.744 | 241.42  | 613.571 | 280.445 | 344.4803 | 2.282428 | 1975.805 |
| 0.977159 | 1594.237 | 664.744 | 241.42  | 613.571 | 280.445 | 344.4803 | 2.282428 | 1975.805 |
| 4.000544 | 1011.503 | 351.963 | 179.538 | 281.873 | 241.433 | 371.2694 | 8.848426 | 2283.271 |
| 12.52371 | 993.896  | 366.841 | 158.388 | 303.399 | 233.035 | 324.8262 | 4.430806 | 1452.51  |
| 16.90351 | 986.811  | 363.566 | 161.582 | 264.788 | 242.427 | 353.8546 | 1.464825 | 1792.748 |
| 14.68604 | 944.988  | 330.019 | 134.217 | 209.285 | 286.834 | 132.9971 | 1.029028 | 1796.389 |
| 15.58609 | 1000.009 | 361.433 | 179.124 | 201.378 | 253.201 | 67.61459 | 3.770963 | 2000.362 |
| 12.20807 | 946.878  | 318.087 | 174.998 | 274.794 | 229.236 | 281.3162 | 5.652831 | 2044.658 |
| 16.90351 | 986.811  | 363.566 | 161.582 | 264.788 | 242.427 | 353.8546 | 1.464825 | 1792.748 |
| 7.473742 | 1066.62  | 398.524 | 135.652 | 371.894 | 273.251 | 110.2755 | 2.379869 | 1729.49  |
| 12.52371 | 993.896  | 366.841 | 158.388 | 303.399 | 233.035 | 326.726  | 4.709216 | 1576.021 |
| 4.91122  | 1063.63  | 371.22  | 193.627 | 282.856 | 269.534 | 289.6766 | 7.741191 | 1246.598 |
| -0.98983 | 956.144  | 346.759 | 160.414 | 239.894 | 218.472 | 333.6983 | 3.161077 | 1300.838 |
| 12.52371 | 993.896  | 366.841 | 158.388 | 303.399 | 233.035 | 326.726  | 4.709216 | 1576.021 |
| 12.52371 | 993.896  | 366.841 | 158.388 | 303.399 | 233.035 | 326.726  | 4.709216 | 1576.021 |
| -1.80355 | 982.029  | 384.009 | 170.345 | 232.275 | 215.746 | 464.0417 | 2.215279 | 1849.836 |
| 12.51116 | 1099.962 | 394.828 | 165.691 | 348.036 | 290.794 | 302.7306 | 0.714524 | 1821.651 |
| 13.81095 | 1034.957 | 372.781 | 154.518 | 273.019 | 309.967 | 216.8499 | 8.778607 | 2428.288 |

Table S2 - Anonymized database

|          |          |         |         |         |         |          |          |          |
|----------|----------|---------|---------|---------|---------|----------|----------|----------|
| 12.52371 | 993.896  | 366.841 | 158.388 | 303.399 | 233.035 | 326.726  | 4.709216 | 1576.021 |
| 9.044802 | 991.827  | 354.167 | 182.75  | 290.509 | 238.406 | 393.3734 | 0.883189 | 1757.257 |
| 12.52371 | 993.896  | 366.841 | 158.388 | 303.399 | 233.035 | 324.8262 | 4.430806 | 1452.51  |
| 0.222209 | 1018.41  | 362.801 | 162.232 | 301.794 | 226.826 | 330.1108 | 1.448045 | 1837.309 |
| 14.25296 | 913.857  | 345.469 | 137.96  | 189.659 | 287.484 | 60.08836 | 2.996304 | 1851.407 |
| 13.84265 | 1240.789 | 517.558 | 149.909 | 474.696 | 246.821 | 261.3956 | 2.788267 | 1863.578 |
| 12.20807 | 946.878  | 318.087 | 174.998 | 274.794 | 229.236 | 281.3162 | 5.652831 | 2044.658 |
| 12.52371 | 993.896  | 366.841 | 158.388 | 303.399 | 233.035 | 324.8262 | 4.430806 | 1452.51  |
| 12.20807 | 946.878  | 318.087 | 174.998 | 274.794 | 229.236 | 337.5405 | 3.893426 | 1645.461 |
| 2.915978 | 1181.614 | 463.026 | 199.043 | 344.474 | 266.835 | 560.2236 | 2.186021 | 2000.388 |
| 2.915978 | 1181.614 | 463.026 | 199.043 | 344.474 | 266.835 | 560.2236 | 2.186021 | 2000.388 |
| 12.20807 | 946.878  | 318.087 | 174.998 | 274.794 | 229.236 | 281.3162 | 5.652831 | 2044.658 |
| 8.854786 | 1061.025 | 387.175 | 189.077 | 311.413 | 246.257 | 334.6038 | 2.363094 | 1913.333 |
| 13.81095 | 1034.957 | 372.781 | 154.518 | 273.019 | 309.967 | 216.8499 | 8.778607 | 2428.288 |
| 16.90351 | 986.811  | 363.566 | 161.582 | 264.788 | 242.427 | 353.8546 | 1.464825 | 1792.748 |
| 12.52371 | 993.896  | 366.841 | 158.388 | 303.399 | 233.035 | 326.726  | 4.709216 | 1576.021 |
| 14.19208 | 966.958  | 367.081 | 135.801 | 233.848 | 293.741 | 126.8244 | 3.309033 | 1579.56  |
| 6.909423 | 992.342  | 340.909 | 154.232 | 245.555 | 285.881 | 184.0726 | 2.807042 | 1659.809 |
| 4.441451 | 1255.458 | 456.667 | 206.111 | 380.475 | 301.287 | 346.7785 | 9.205475 | 1602.376 |
| 7.770912 | 1003.114 | 339.764 | 159.097 | 249.623 | 287.605 | 191.539  | 8.983807 | 1815.853 |
| 9.044802 | 991.827  | 354.167 | 182.75  | 290.509 | 238.406 | 393.3734 | 0.883189 | 1757.257 |
| 8.854786 | 1061.025 | 387.175 | 189.077 | 311.413 | 246.257 | 334.6038 | 2.363094 | 1913.333 |
| 0.498819 | 1041.527 | 361.072 | 186.248 | 309.375 | 247.21  | 344.0219 | 8.271492 | 2272.567 |
| 4.000544 | 1011.503 | 351.963 | 179.538 | 281.873 | 241.433 | 371.2694 | 8.848426 | 2283.271 |
| 14.11634 | 987.686  | 347.181 | 135.313 | 280.523 | 287.051 | 278.7108 | 2.373454 | 1633.689 |
| 14.25296 | 913.857  | 345.469 | 137.96  | 189.659 | 287.484 | 60.08836 | 2.996304 | 1851.407 |
| 12.52371 | 993.896  | 366.841 | 158.388 | 303.399 | 233.035 | 324.8262 | 4.430806 | 1452.51  |
| 7.770912 | 1003.114 | 339.764 | 159.097 | 249.623 | 287.605 | 191.539  | 8.983807 | 1815.853 |
| 4.12744  | 1143.212 | 368.326 | 233.217 | 302.355 | 303.292 | 332.479  | 1.43155  | 1747.347 |
| 13.84265 | 1240.789 | 517.558 | 149.909 | 474.696 | 246.821 | 261.3956 | 2.788267 | 1863.578 |
| 12.52371 | 993.896  | 366.841 | 158.388 | 303.399 | 233.035 | 326.726  | 4.709216 | 1576.021 |
| 12.51116 | 1099.962 | 394.828 | 165.691 | 348.036 | 290.794 | 302.7306 | 0.714524 | 1821.651 |
| 0.479769 | 1017.669 | 352.698 | 182.124 | 285.505 | 245.116 | 351.0301 | 7.706647 | 1808.782 |
| 7.49811  | 1020.529 | 349.305 | 144.313 | 305.725 | 275.767 | 129.0689 | 5.067988 | 2231.996 |
| 15.44095 | 969.157  | 366.644 | 144.347 | 243.381 | 276.543 | 61.45306 | 4.601897 | 1495.971 |
| 12.51116 | 1099.962 | 394.828 | 165.691 | 348.036 | 290.794 | 302.7306 | 0.714524 | 1821.651 |
| 1.375121 | 1021.311 | 345.988 | 189.06  | 237.048 | 251.852 | 342.6181 | 4.375702 | 1469.899 |
| 8.854786 | 1061.025 | 387.175 | 189.077 | 311.413 | 246.257 | 334.6038 | 2.363094 | 1913.333 |
| 16.90351 | 986.811  | 363.566 | 161.582 | 264.788 | 242.427 | 353.8546 | 1.464825 | 1792.748 |
| 12.52371 | 993.896  | 366.841 | 158.388 | 303.399 | 233.035 | 324.8262 | 4.430806 | 1452.51  |
| 14.53205 | 1109.398 | 381.222 | 185.432 | 255.372 | 311.253 | 90.55988 | 3.017958 | 1646.286 |
| 6.501401 | 701.054  | 230.791 | 121.731 | 167.889 | 212.075 | 192.8504 | 1.106623 | 1910.482 |
| 4.12744  | 1143.212 | 368.326 | 233.217 | 302.355 | 303.292 | 332.479  | 1.43155  | 1747.347 |
| 15.44095 | 969.157  | 366.644 | 144.347 | 243.381 | 276.543 | 61.45306 | 4.601897 | 1495.971 |
| -1.34088 | 925.463  | 302.666 | 166.731 | 241.107 | 214.488 | 502.9605 | 5.291672 | 1632.742 |
| 12.52371 | 993.896  | 366.841 | 158.388 | 303.399 | 233.035 | 326.726  | 4.709216 | 1576.021 |
| 13.87799 | 934.095  | 354.856 | 143.822 | 199.265 | 294.851 | 136.4366 | 3.643151 | 1641.586 |
| 10.92335 | 976.525  | 356.957 | 166.786 | 307.865 | 215.414 | 383.0372 | 3.69426  | 1981.62  |
| -1.80355 | 982.029  | 384.009 | 170.345 | 232.275 | 215.746 | 464.0417 | 2.215279 | 1849.836 |
| 15.75438 | 900.163  | 331.78  | 120.801 | 249.553 | 271.399 | 201.7106 | 1.461046 | 1938.337 |



Table S2 - Anonymized database

|          |          |         |         |         |         |          |          |          |
|----------|----------|---------|---------|---------|---------|----------|----------|----------|
| 13.81095 | 1034.957 | 372.781 | 154.518 | 273.019 | 309.967 | 216.8499 | 8.778607 | 2428.288 |
| 7.49811  | 1020.529 | 349.305 | 144.313 | 305.725 | 275.767 | 129.0689 | 5.067988 | 2231.996 |
| 12.52371 | 993.896  | 366.841 | 158.388 | 303.399 | 233.035 | 326.726  | 4.709216 | 1576.021 |
| 10.92335 | 976.525  | 356.957 | 166.786 | 307.865 | 215.414 | 383.0372 | 3.69426  | 1981.62  |
| 16.90351 | 986.811  | 363.566 | 161.582 | 264.788 | 242.427 | 353.8546 | 1.464825 | 1792.748 |
| -0.1286  | 1094.69  | 356.775 | 194.064 | 288.347 | 257.338 | 427.4386 | 0.903677 | 1672.949 |
| -1.80355 | 982.029  | 384.009 | 170.345 | 232.275 | 215.746 | 464.0417 | 2.215279 | 1849.836 |
| 12.52371 | 993.896  | 366.841 | 158.388 | 303.399 | 233.035 | 326.726  | 4.709216 | 1576.021 |
| 12.52371 | 993.896  | 366.841 | 158.388 | 303.399 | 233.035 | 326.726  | 4.709216 | 1576.021 |
| 0.479769 | 1017.669 | 352.698 | 182.124 | 285.505 | 245.116 | 351.0301 | 7.706647 | 1808.782 |
| 13.84265 | 1240.789 | 517.558 | 149.909 | 474.696 | 246.821 | 261.3956 | 2.788267 | 1863.578 |
| -1.80355 | 982.029  | 384.009 | 170.345 | 232.275 | 215.746 | 464.0417 | 2.215279 | 1849.836 |
| 14.14814 | 987.4    | 387.621 | 161.22  | 214.5   | 325.319 | 138.9436 | 4.177484 | 1768.744 |
| 4.12744  | 1143.212 | 368.326 | 233.217 | 302.355 | 303.292 | 332.479  | 1.43155  | 1747.347 |
| 13.84265 | 1240.789 | 517.558 | 149.909 | 474.696 | 246.821 | 261.3956 | 2.788267 | 1863.578 |
| 0.479769 | 1017.669 | 352.698 | 182.124 | 285.505 | 245.116 | 351.0301 | 7.706647 | 1808.782 |
| 14.14814 | 987.4    | 387.621 | 161.22  | 214.5   | 325.319 | 138.9436 | 4.177484 | 1768.744 |
| 0.479769 | 1017.669 | 352.698 | 182.124 | 285.505 | 245.116 | 351.0301 | 7.706647 | 1808.782 |
| 12.52371 | 993.896  | 366.841 | 158.388 | 303.399 | 233.035 | 326.726  | 4.709216 | 1576.021 |
| -1.34088 | 925.463  | 302.666 | 166.731 | 241.107 | 214.488 | 502.9605 | 5.291672 | 1632.742 |
| 12.52371 | 993.896  | 366.841 | 158.388 | 303.399 | 233.035 | 324.8262 | 4.430806 | 1452.51  |
| -1.80355 | 982.029  | 384.009 | 170.345 | 232.275 | 215.746 | 464.0417 | 2.215279 | 1849.836 |
| 15.75438 | 900.163  | 331.78  | 120.801 | 249.553 | 271.399 | 201.7106 | 1.461046 | 1938.337 |
| 4.12744  | 1143.212 | 368.326 | 233.217 | 302.355 | 303.292 | 332.479  | 1.43155  | 1747.347 |
| 12.52371 | 993.896  | 366.841 | 158.388 | 303.399 | 233.035 | 324.8262 | 4.430806 | 1452.51  |
| 14.53205 | 1109.398 | 381.222 | 185.432 | 255.372 | 311.253 | 90.55988 | 3.017958 | 1646.286 |
| 14.63104 | 838.498  | 327.419 | 138.423 | 194.725 | 283.686 | 207.2583 | 1.315532 | 1774.275 |
| 15.44095 | 969.157  | 366.644 | 144.347 | 243.381 | 276.543 | 61.45306 | 4.601897 | 1495.971 |
| -1.80355 | 982.029  | 384.009 | 170.345 | 232.275 | 215.746 | 464.0417 | 2.215279 | 1849.836 |
| -1.80355 | 982.029  | 384.009 | 170.345 | 232.275 | 215.746 | 464.0417 | 2.215279 | 1849.836 |
| 15.75438 | 900.163  | 331.78  | 120.801 | 249.553 | 271.399 | 201.7106 | 1.461046 | 1938.337 |
| 12.51116 | 1099.962 | 394.828 | 165.691 | 348.036 | 290.794 | 302.7306 | 0.714524 | 1821.651 |
| 15.12292 | 998.573  | 362.943 | 154.869 | 227.313 | 280.001 | 65.75416 | 1.331257 | 1836.56  |
| 13.87799 | 934.095  | 354.856 | 143.822 | 199.265 | 294.851 | 136.4366 | 3.643151 | 1641.586 |
| -1.80355 | 982.029  | 384.009 | 170.345 | 232.275 | 215.746 | 464.0417 | 2.215279 | 1849.836 |
| 12.20807 | 946.878  | 318.087 | 174.998 | 274.794 | 229.236 | 337.5405 | 3.893426 | 1645.461 |
| 14.30245 | 999.755  | 345.534 | 169.656 | 210.583 | 290.658 | 119.721  | 3.06824  | 1631.99  |
| -1.34088 | 925.463  | 302.666 | 166.731 | 241.107 | 214.488 | 502.9605 | 5.291672 | 1632.742 |
| 1.623912 | 1157.452 | 440.171 | 189.349 | 381.165 | 251.905 | 300.6322 | 3.048275 | 2061.277 |
| 12.51116 | 1099.962 | 394.828 | 165.691 | 348.036 | 290.794 | 302.7306 | 0.714524 | 1821.651 |
| -1.80355 | 982.029  | 384.009 | 170.345 | 232.275 | 215.746 | 464.0417 | 2.215279 | 1849.836 |
| 7.11078  | 1049.088 | 353.943 | 146.009 | 284.948 | 296.027 | 202.8772 | 0.626459 | 1847.405 |
| 0.479769 | 1017.669 | 352.698 | 182.124 | 285.505 | 245.116 | 351.0301 | 7.706647 | 1808.782 |
| 12.51116 | 1099.962 | 394.828 | 165.691 | 348.036 | 290.794 | 302.7306 | 0.714524 | 1821.651 |
| 4.000544 | 1011.503 | 351.963 | 179.538 | 281.873 | 241.433 | 371.2694 | 8.848426 | 2283.271 |
| 7.11078  | 1049.088 | 353.943 | 146.009 | 284.948 | 296.027 | 202.8772 | 0.626459 | 1847.405 |
| 14.26695 | 975.32   | 347.324 | 129.172 | 244.574 | 273.307 | 94.82304 | 0.619173 | 1813.049 |
| 16.90351 | 986.811  | 363.566 | 161.582 | 264.788 | 242.427 | 353.8546 | 1.464825 | 1792.748 |
| 13.84265 | 1240.789 | 517.558 | 149.909 | 474.696 | 246.821 | 261.3956 | 2.788267 | 1863.578 |
| 12.20807 | 946.878  | 318.087 | 174.998 | 274.794 | 229.236 | 281.3162 | 5.652831 | 2044.658 |

Table S2 - Anonymized database

|          |          |         |         |         |         |          |          |          |
|----------|----------|---------|---------|---------|---------|----------|----------|----------|
| 14.26695 | 975.32   | 347.324 | 129.172 | 244.574 | 273.307 | 94.82304 | 0.619173 | 1813.049 |
| 15.75438 | 900.163  | 331.78  | 120.801 | 249.553 | 271.399 | 201.7106 | 1.461046 | 1938.337 |
| 15.44095 | 969.157  | 366.644 | 144.347 | 243.381 | 276.543 | 61.45306 | 4.601897 | 1495.971 |
| -1.34088 | 925.463  | 302.666 | 166.731 | 241.107 | 214.488 | 502.9605 | 5.291672 | 1632.742 |
| 12.52371 | 993.896  | 366.841 | 158.388 | 303.399 | 233.035 | 326.726  | 4.709216 | 1576.021 |
| 12.52371 | 993.896  | 366.841 | 158.388 | 303.399 | 233.035 | 326.726  | 4.709216 | 1576.021 |
| 3.715302 | 835.73   | 299.191 | 144.341 | 227.131 | 219.342 | 371.2189 | 6.547291 | 2148.801 |
| 12.51116 | 1099.962 | 394.828 | 165.691 | 348.036 | 290.794 | 302.7306 | 0.714524 | 1821.651 |
| 10.92335 | 976.525  | 356.957 | 166.786 | 307.865 | 215.414 | 383.0372 | 3.69426  | 1981.62  |
| 9.044802 | 991.827  | 354.167 | 182.75  | 290.509 | 238.406 | 393.3734 | 0.883189 | 1757.257 |
| 7.854473 | 1014.61  | 335.897 | 184.492 | 209.822 | 274.534 | 123.7461 | 2.737207 | 1736.878 |
| 12.52371 | 993.896  | 366.841 | 158.388 | 303.399 | 233.035 | 324.8262 | 4.430806 | 1452.51  |
| 9.044802 | 991.827  | 354.167 | 182.75  | 290.509 | 238.406 | 393.3734 | 0.883189 | 1757.257 |
| 4.000544 | 1011.503 | 351.963 | 179.538 | 281.873 | 241.433 | 371.2694 | 8.848426 | 2283.271 |
| 9.044802 | 991.827  | 354.167 | 182.75  | 290.509 | 238.406 | 393.3734 | 0.883189 | 1757.257 |
| 16.90351 | 986.811  | 363.566 | 161.582 | 264.788 | 242.427 | 353.8546 | 1.464825 | 1792.748 |
| 14.63104 | 838.498  | 327.419 | 138.423 | 194.725 | 283.686 | 207.2583 | 1.315532 | 1774.275 |
| 7.11078  | 1049.088 | 353.943 | 146.009 | 284.948 | 296.027 | 202.8772 | 0.626459 | 1847.405 |
| 4.000544 | 1011.503 | 351.963 | 179.538 | 281.873 | 241.433 | 371.2694 | 8.848426 | 2283.271 |
| 2.915978 | 1181.614 | 463.026 | 199.043 | 344.474 | 266.835 | 560.2236 | 2.186021 | 2000.388 |
| 14.25296 | 913.857  | 345.469 | 137.96  | 189.659 | 287.484 | 60.08836 | 2.996304 | 1851.407 |
| 12.52371 | 993.896  | 366.841 | 158.388 | 303.399 | 233.035 | 324.8262 | 4.430806 | 1452.51  |
| -1.34088 | 925.463  | 302.666 | 166.731 | 241.107 | 214.488 | 502.9605 | 5.291672 | 1632.742 |
| 7.11078  | 1049.088 | 353.943 | 146.009 | 284.948 | 296.027 | 202.8772 | 0.626459 | 1847.405 |
| 14.53205 | 1109.398 | 381.222 | 185.432 | 255.372 | 311.253 | 90.55988 | 3.017958 | 1646.286 |
| 4.000544 | 1011.503 | 351.963 | 179.538 | 281.873 | 241.433 | 371.2694 | 8.848426 | 2283.271 |
| 10.92335 | 976.525  | 356.957 | 166.786 | 307.865 | 215.414 | 383.0372 | 3.69426  | 1981.62  |
| 14.76842 | 1009.45  | 358.954 | 157.905 | 225.445 | 283.931 | 111.7041 | 1.756512 | 1916.818 |
| -1.80355 | 982.029  | 384.009 | 170.345 | 232.275 | 215.746 | 464.0417 | 2.215279 | 1849.836 |
| 8.854786 | 1061.025 | 387.175 | 189.077 | 311.413 | 246.257 | 334.6038 | 2.363094 | 1913.333 |
| 12.52371 | 993.896  | 366.841 | 158.388 | 303.399 | 233.035 | 324.8262 | 4.430806 | 1452.51  |
| 14.53205 | 1109.398 | 381.222 | 185.432 | 255.372 | 311.253 | 90.55988 | 3.017958 | 1646.286 |
| 12.52371 | 993.896  | 366.841 | 158.388 | 303.399 | 233.035 | 326.726  | 4.709216 | 1576.021 |
| 4.12744  | 1143.212 | 368.326 | 233.217 | 302.355 | 303.292 | 332.479  | 1.43155  | 1747.347 |
| 15.75438 | 900.163  | 331.78  | 120.801 | 249.553 | 271.399 | 201.7106 | 1.461046 | 1938.337 |
| 12.51116 | 1099.962 | 394.828 | 165.691 | 348.036 | 290.794 | 302.7306 | 0.714524 | 1821.651 |
| 12.52371 | 993.896  | 366.841 | 158.388 | 303.399 | 233.035 | 326.726  | 4.709216 | 1576.021 |
| 6.99744  | 1068.364 | 377.113 | 166.177 | 273.454 | 299.788 | 135.5694 | 8.309216 | 1940.668 |
| 2.915978 | 1181.614 | 463.026 | 199.043 | 344.474 | 266.835 | 560.2236 | 2.186021 | 2000.388 |
| -0.98983 | 956.144  | 346.759 | 160.414 | 239.894 | 218.472 | 333.6983 | 3.161077 | 1300.838 |
| 14.25296 | 913.857  | 345.469 | 137.96  | 189.659 | 287.484 | 60.08836 | 2.996304 | 1851.407 |
| 10.92335 | 976.525  | 356.957 | 166.786 | 307.865 | 215.414 | 383.0372 | 3.69426  | 1981.62  |
| 7.56167  | 1085.974 | 370.378 | 169.387 | 288.858 | 317.829 | 300.4833 | 2.304261 | 1756.669 |
| 12.52371 | 993.896  | 366.841 | 158.388 | 303.399 | 233.035 | 324.8262 | 4.430806 | 1452.51  |
| 4.000544 | 1011.503 | 351.963 | 179.538 | 281.873 | 241.433 | 371.2694 | 8.848426 | 2283.271 |
| 3.715302 | 835.73   | 299.191 | 144.341 | 227.131 | 219.342 | 371.2189 | 6.547291 | 2148.801 |
| 0.479769 | 1017.669 | 352.698 | 182.124 | 285.505 | 245.116 | 351.0301 | 7.706647 | 1808.782 |
| -0.98983 | 956.144  | 346.759 | 160.414 | 239.894 | 218.472 | 333.6983 | 3.161077 | 1300.838 |
| -1.80355 | 982.029  | 384.009 | 170.345 | 232.275 | 215.746 | 464.0417 | 2.215279 | 1849.836 |
| 13.84265 | 1240.789 | 517.558 | 149.909 | 474.696 | 246.821 | 261.3956 | 2.788267 | 1863.578 |

Table S2 - Anonymized database

|          |          |         |         |         |         |          |          |          |
|----------|----------|---------|---------|---------|---------|----------|----------|----------|
| 3.715302 | 835.73   | 299.191 | 144.341 | 227.131 | 219.342 | 371.2189 | 6.547291 | 2148.801 |
| 14.26695 | 975.32   | 347.324 | 129.172 | 244.574 | 273.307 | 94.82304 | 0.619173 | 1813.049 |
| 4.000544 | 1011.503 | 351.963 | 179.538 | 281.873 | 241.433 | 371.2694 | 8.848426 | 2283.271 |
| 12.52371 | 993.896  | 366.841 | 158.388 | 303.399 | 233.035 | 326.726  | 4.709216 | 1576.021 |
| 8.854786 | 1061.025 | 387.175 | 189.077 | 311.413 | 246.257 | 334.6038 | 2.363094 | 1913.333 |
| 14.25296 | 913.857  | 345.469 | 137.96  | 189.659 | 287.484 | 60.08836 | 2.996304 | 1851.407 |
| 13.43378 | 1174.369 | 424.168 | 207.11  | 349.535 | 265.892 | 399.359  | 3.519502 | 1809.91  |
| 12.52371 | 993.896  | 366.841 | 158.388 | 303.399 | 233.035 | 324.8262 | 4.430806 | 1452.51  |
| 14.53205 | 1109.398 | 381.222 | 185.432 | 255.372 | 311.253 | 90.55988 | 3.017958 | 1646.286 |
| 12.52371 | 993.896  | 366.841 | 158.388 | 303.399 | 233.035 | 326.726  | 4.709216 | 1576.021 |
| 15.75438 | 900.163  | 331.78  | 120.801 | 249.553 | 271.399 | 201.7106 | 1.461046 | 1938.337 |
| 2.915978 | 1181.614 | 463.026 | 199.043 | 344.474 | 266.835 | 560.2236 | 2.186021 | 2000.388 |
| 15.58609 | 1000.009 | 361.433 | 179.124 | 201.378 | 253.201 | 67.61459 | 3.770963 | 2000.362 |
| 15.12292 | 998.573  | 362.943 | 154.869 | 227.313 | 280.001 | 65.75416 | 1.331257 | 1836.56  |
| 8.854786 | 1061.025 | 387.175 | 189.077 | 311.413 | 246.257 | 334.6038 | 2.363094 | 1913.333 |
| 13.84265 | 1240.789 | 517.558 | 149.909 | 474.696 | 246.821 | 261.3956 | 2.788267 | 1863.578 |
| 3.715302 | 835.73   | 299.191 | 144.341 | 227.131 | 219.342 | 371.2189 | 6.547291 | 2148.801 |
| 12.52371 | 993.896  | 366.841 | 158.388 | 303.399 | 233.035 | 326.726  | 4.709216 | 1576.021 |
| 14.14814 | 987.4    | 387.621 | 161.22  | 214.5   | 325.319 | 138.9436 | 4.177484 | 1768.744 |
| 10.92335 | 976.525  | 356.957 | 166.786 | 307.865 | 215.414 | 383.0372 | 3.69426  | 1981.62  |
| 14.14814 | 987.4    | 387.621 | 161.22  | 214.5   | 325.319 | 138.9436 | 4.177484 | 1768.744 |
| 1.375121 | 1021.311 | 345.988 | 189.06  | 237.048 | 251.852 | 342.6181 | 4.375702 | 1469.899 |
| 12.51116 | 1099.962 | 394.828 | 165.691 | 348.036 | 290.794 | 302.7306 | 0.714524 | 1821.651 |
| 14.76842 | 1009.45  | 358.954 | 157.905 | 225.445 | 283.931 | 111.7041 | 1.756512 | 1916.818 |
| 0.479769 | 1017.669 | 352.698 | 182.124 | 285.505 | 245.116 | 351.0301 | 7.706647 | 1808.782 |
| 0.498819 | 1041.527 | 361.072 | 186.248 | 309.375 | 247.21  | 344.0219 | 8.271492 | 2272.567 |
| 8.854786 | 1061.025 | 387.175 | 189.077 | 311.413 | 246.257 | 334.6038 | 2.363094 | 1913.333 |
| 4.12744  | 1143.212 | 368.326 | 233.217 | 302.355 | 303.292 | 332.479  | 1.43155  | 1747.347 |
| 6.909423 | 992.342  | 340.909 | 154.232 | 245.555 | 285.881 | 184.0726 | 2.807042 | 1659.809 |
| 12.52371 | 993.896  | 366.841 | 158.388 | 303.399 | 233.035 | 324.8262 | 4.430806 | 1452.51  |
| 10.92335 | 976.525  | 356.957 | 166.786 | 307.865 | 215.414 | 383.0372 | 3.69426  | 1981.62  |
| 14.25296 | 913.857  | 345.469 | 137.96  | 189.659 | 287.484 | 60.08836 | 2.996304 | 1851.407 |
| 14.68604 | 944.988  | 330.019 | 134.217 | 209.285 | 286.834 | 132.9971 | 1.029028 | 1796.389 |
| 7.56167  | 1085.974 | 370.378 | 169.387 | 288.858 | 317.829 | 300.4833 | 2.304261 | 1756.669 |
| 12.51116 | 1099.962 | 394.828 | 165.691 | 348.036 | 290.794 | 302.7306 | 0.714524 | 1821.651 |
| 2.915978 | 1181.614 | 463.026 | 199.043 | 344.474 | 266.835 | 560.2236 | 2.186021 | 2000.388 |
| -1.34088 | 925.463  | 302.666 | 166.731 | 241.107 | 214.488 | 502.9605 | 5.291672 | 1632.742 |
| 9.354027 | 957.175  | 340.137 | 181.652 | 277.985 | 229.463 | 288.2634 | 7.966951 | 2209.513 |
| -1.34088 | 925.463  | 302.666 | 166.731 | 241.107 | 214.488 | 502.9605 | 5.291672 | 1632.742 |
| 14.32436 | 957.012  | 345.225 | 160.053 | 205.484 | 283.088 | 73.95937 | 4.403274 | 1673.257 |
| -0.16976 | 1173.229 | 429.033 | 154.596 | 419.01  | 170.398 | 324.8262 | 4.430806 | 1452.51  |
| -1.24171 | 1063.862 | 365.344 | 157.394 | 355.954 | 171.554 | 358.2814 | 3.191571 | 1939.405 |
| 16.66705 | 1638.333 | 620.346 | 275.441 | 543.848 | 283.835 | 581.6044 | 5.521491 | 1480.118 |
| 0.771571 | 1197.382 | 458.126 | 182.4   | 415.096 | 182.4   | 326.7982 | 10.80945 | 1379.297 |
| 0.851703 | 1355.105 | 492.748 | 223.249 | 415.345 | 223.249 | 344.9812 | 0.403961 | 1862.702 |
| 0.520451 | 1256.469 | 464.044 | 198.199 | 401.5   | 198.199 | 341.0001 | 4.046354 | 2112.621 |
| 0.621198 | 1219.512 | 468.387 | 202.814 | 393.063 | 202.814 | 311.9337 | 7.613102 | 2064.278 |
| -0.16976 | 1173.229 | 429.033 | 154.596 | 419.01  | 170.398 | 324.8262 | 4.430806 | 1452.51  |
| 1.689896 | 977.137  | 384.824 | 146.945 | 333.587 | 146.945 | 106.5691 | 4.151762 | 1547.465 |
| -0.16976 | 1173.229 | 429.033 | 154.596 | 419.01  | 170.398 | 324.8262 | 4.430806 | 1452.51  |

Table S2 - Anonymized database

|          |          |         |         |         |         |          |          |          |
|----------|----------|---------|---------|---------|---------|----------|----------|----------|
| 19.98208 | 1282.251 | 428.942 | 199.648 | 282.135 | 301.821 | 261.3956 | 2.788267 | 1863.578 |
| 18.51983 | 1182.28  | 468.97  | 149.281 | 389.263 | 228.039 | 311.9507 | 4.48972  | 1438.063 |
| 16.66705 | 1638.333 | 620.346 | 275.441 | 543.848 | 283.835 | 581.6044 | 5.521491 | 1480.118 |
| 0.621198 | 1219.512 | 468.387 | 202.814 | 393.063 | 202.814 | 311.9337 | 7.613102 | 2064.278 |
| 1.34567  | 1036.298 | 416.576 | 125.763 | 351.163 | 125.763 | 98.39349 | 4.764332 | 1521.834 |
| 0.621198 | 1219.512 | 468.387 | 202.814 | 393.063 | 202.814 | 311.9337 | 7.613102 | 2064.278 |
| 18.51983 | 1182.28  | 468.97  | 149.281 | 389.263 | 228.039 | 311.9507 | 4.48972  | 1438.063 |
| 18.06966 | 1187.626 | 460.407 | 120.673 | 370.06  | 252.737 | 353.7827 | 1.677322 | 1845.688 |
| 1.222846 | 1081.288 | 481.4   | 110.162 | 440.515 | 110.162 | 138.7071 | 2.50683  | 1815.574 |
| -0.16976 | 1173.229 | 429.033 | 154.596 | 419.01  | 170.398 | 324.8262 | 4.430806 | 1452.51  |
| -1.68034 | 1121.098 | 416.359 | 203.313 | 357.376 | 203.313 | 444.7566 | 3.02755  | 1895.277 |
| 1.222846 | 1081.288 | 481.4   | 110.162 | 440.515 | 110.162 | 138.7071 | 2.50683  | 1815.574 |
| 0.621198 | 1219.512 | 468.387 | 202.814 | 393.063 | 202.814 | 311.9337 | 7.613102 | 2064.278 |
| -1.24171 | 1063.862 | 365.344 | 157.394 | 355.954 | 171.554 | 358.2814 | 3.191571 | 1939.405 |
| 1.266747 | 1132.892 | 504.388 | 117.166 | 469.63  | 117.166 | 130.4095 | 12.40068 | 2461.734 |
| 18.51983 | 1182.28  | 468.97  | 149.281 | 389.263 | 228.039 | 311.9507 | 4.48972  | 1438.063 |
| 1.34567  | 1036.298 | 416.576 | 125.763 | 351.163 | 125.763 | 98.39349 | 4.764332 | 1521.834 |
| 1.222846 | 1081.288 | 481.4   | 110.162 | 440.515 | 110.162 | 138.7071 | 2.50683  | 1815.574 |
| 1.222846 | 1081.288 | 481.4   | 110.162 | 440.515 | 110.162 | 138.7071 | 2.50683  | 1815.574 |
| 0.913973 | 1173.967 | 450.496 | 167.028 | 431.8   | 167.028 | 252.7432 | 7.030299 | 2220.283 |
| 10.40388 | 1050.159 | 366.522 | 140.553 | 358.447 | 160.446 | 257.2712 | 12.69096 | 821.2842 |
| 6.802302 | 1272.427 | 502.081 | 162.056 | 449.659 | 195.962 | 499.9418 | 1.755741 | 1653.932 |
| 17.96497 | 1217.182 | 430.052 | 155.312 | 302.152 | 227.337 | 330.8731 | 0.217345 | 1789.407 |
| 1.250885 | 1300.403 | 531.24  | 183.097 | 512.437 | 183.097 | 332.2233 | 16.70643 | 1434.77  |
| 18.51983 | 1182.28  | 468.97  | 149.281 | 389.263 | 228.039 | 311.9507 | 4.48972  | 1438.063 |
| 0.924357 | 1193.517 | 454.643 | 160.198 | 433.523 | 160.198 | 269.1555 | 0.307515 | 1886.006 |
| -0.16976 | 1173.229 | 429.033 | 154.596 | 419.01  | 170.398 | 324.8262 | 4.430806 | 1452.51  |
| 10.41302 | 1107.858 | 399.833 | 144.454 | 360.669 | 180.515 | 442.1107 | 8.673082 | 1871.338 |
| 1.748725 | 1014.328 | 389.7   | 141.235 | 333.39  | 141.235 | 185.4104 | 10.88632 | 2682.429 |
| 0.913973 | 1173.967 | 450.496 | 167.028 | 431.8   | 167.028 | 252.7432 | 7.030299 | 2220.283 |
| 6.802302 | 1272.427 | 502.081 | 162.056 | 449.659 | 195.962 | 499.9418 | 1.755741 | 1653.932 |
| 16.66705 | 1638.333 | 620.346 | 275.441 | 543.848 | 283.835 | 581.6044 | 5.521491 | 1480.118 |
| 1.34567  | 1036.298 | 416.576 | 125.763 | 351.163 | 125.763 | 98.39349 | 4.764332 | 1521.834 |
| 18.51983 | 1182.28  | 468.97  | 149.281 | 389.263 | 228.039 | 311.9507 | 4.48972  | 1438.063 |
| 1.34567  | 1036.298 | 416.576 | 125.763 | 351.163 | 125.763 | 98.39349 | 4.764332 | 1521.834 |
| 1.154319 | 1069.139 | 395.328 | 155.942 | 377.332 | 155.942 | 99.84711 | 3.078826 | 1649.392 |
| 0.082527 | 1290.431 | 569.334 | 129.365 | 564.797 | 129.365 | 222.9399 | 2.51953  | 2007.912 |
| 10.41302 | 1107.858 | 399.833 | 144.454 | 360.669 | 180.515 | 442.1107 | 8.673082 | 1871.338 |
| 18.31974 | 1205.787 | 450.19  | 167.266 | 347.842 | 213.155 | 342.0194 | 5.998885 | 1432.308 |
| 1.34567  | 1036.298 | 416.576 | 125.763 | 351.163 | 125.763 | 98.39349 | 4.764332 | 1521.834 |
| 0.621198 | 1219.512 | 468.387 | 202.814 | 393.063 | 202.814 | 311.9337 | 7.613102 | 2064.278 |
| 1.591879 | 1120.093 | 442.314 | 150.672 | 406.007 | 150.672 | 78.42129 | 6.451437 | 1501.143 |
| 1.154319 | 1069.139 | 395.328 | 155.942 | 377.332 | 155.942 | 99.84711 | 3.078826 | 1649.392 |
| 1.34567  | 1036.298 | 416.576 | 125.763 | 351.163 | 125.763 | 98.39349 | 4.764332 | 1521.834 |
| 1.222846 | 1081.288 | 481.4   | 110.162 | 440.515 | 110.162 | 138.7071 | 2.50683  | 1815.574 |
| 18.06966 | 1187.626 | 460.407 | 120.673 | 370.06  | 252.737 | 353.7827 | 1.677322 | 1845.688 |
| 1.222846 | 1081.288 | 481.4   | 110.162 | 440.515 | 110.162 | 138.7071 | 2.50683  | 1815.574 |
| 1.193769 | 1313.203 | 540.484 | 182.942 | 510.422 | 182.942 | 353.818  | 9.800788 | 2414.645 |
| 0.082527 | 1290.431 | 569.334 | 129.365 | 564.797 | 129.365 | 222.9399 | 2.51953  | 2007.912 |
| 16.66705 | 1638.333 | 620.346 | 275.441 | 543.848 | 283.835 | 581.6044 | 5.521491 | 1480.118 |

Table S2 - Anonymized database

|          |          |         |         |         |         |          |          |          |
|----------|----------|---------|---------|---------|---------|----------|----------|----------|
| 1.689896 | 977.137  | 384.824 | 146.945 | 333.587 | 146.945 | 106.5691 | 4.151762 | 1547.465 |
| 1.591879 | 1120.093 | 442.314 | 150.672 | 406.007 | 150.672 | 78.42129 | 6.451437 | 1501.143 |
| 0.816011 | 1260.301 | 478.654 | 184.986 | 452.367 | 184.986 | 311.8525 | 9.304274 | 2253.092 |
| 1.34567  | 1036.298 | 416.576 | 125.763 | 351.163 | 125.763 | 98.39349 | 4.764332 | 1521.834 |
| 6.802302 | 1272.427 | 502.081 | 162.056 | 449.659 | 195.962 | 499.9418 | 1.755741 | 1653.932 |
| 1.601962 | 1072.172 | 436.875 | 137.997 | 384.836 | 137.997 | 218.33   | 14.04217 | 963.5971 |
| 0.621198 | 1219.512 | 468.387 | 202.814 | 393.063 | 202.814 | 311.9337 | 7.613102 | 2064.278 |
| 0.278016 | 1231.077 | 450.28  | 214.251 | 388.43  | 214.251 | 350.8546 | 4.056374 | 2002.568 |
| 0.816011 | 1260.301 | 478.654 | 184.986 | 452.367 | 184.986 | 311.8525 | 9.304274 | 2253.092 |
| 1.222846 | 1081.288 | 481.4   | 110.162 | 440.515 | 110.162 | 138.7071 | 2.50683  | 1815.574 |
| 18.51983 | 1182.28  | 468.97  | 149.281 | 389.263 | 228.039 | 311.9507 | 4.48972  | 1438.063 |
| 1.193769 | 1313.203 | 540.484 | 182.942 | 510.422 | 182.942 | 353.818  | 9.800788 | 2414.645 |
| 19.98208 | 1282.251 | 428.942 | 199.648 | 282.135 | 301.821 | 261.3956 | 2.788267 | 1863.578 |
| 17.83516 | 1263.249 | 455.287 | 161.919 | 339.602 | 231.219 | 368.9091 | 0.768818 | 1715.272 |
| 2.199714 | 1096.915 | 414.401 | 166.252 | 391.109 | 169.133 | 90.27238 | 2.59097  | 1700.188 |
| 6.802302 | 1272.427 | 502.081 | 162.056 | 449.659 | 195.962 | 499.9418 | 1.755741 | 1653.932 |
| 1.14756  | 1229.533 | 480.647 | 158.43  | 449.146 | 158.43  | 320.661  | 3.05985  | 1967.903 |
| 6.802302 | 1272.427 | 502.081 | 162.056 | 449.659 | 195.962 | 499.9418 | 1.755741 | 1653.932 |
| 0.951566 | 1240.925 | 465.009 | 181.022 | 445.045 | 181.022 | 270.6296 | 0.168178 | 1811.263 |
| 0.771571 | 1197.382 | 458.126 | 182.4   | 415.096 | 182.4   | 326.7982 | 10.80945 | 1379.297 |
| 0.913973 | 1173.967 | 450.496 | 167.028 | 431.8   | 167.028 | 252.7432 | 7.030299 | 2220.283 |
| 0.542005 | 1264.835 | 458.168 | 192.243 | 422.977 | 192.243 | 344.0219 | 8.271492 | 2272.567 |
| 0.437352 | 1192.216 | 424.53  | 193.203 | 358.705 | 193.203 | 369.287  | 5.148047 | 1885.585 |
| -0.78801 | 1101.295 | 387.341 | 150.397 | 374.596 | 161.97  | 487.1186 | 2.469619 | 1975.047 |
| 1.222846 | 1081.288 | 481.4   | 110.162 | 440.515 | 110.162 | 138.7071 | 2.50683  | 1815.574 |
| 0.951566 | 1240.925 | 465.009 | 181.022 | 445.045 | 181.022 | 270.6296 | 0.168178 | 1811.263 |
| 0.913973 | 1173.967 | 450.496 | 167.028 | 431.8   | 167.028 | 252.7432 | 7.030299 | 2220.283 |
| 16.66705 | 1638.333 | 620.346 | 275.441 | 543.848 | 283.835 | 581.6044 | 5.521491 | 1480.118 |
| 1.34567  | 1036.298 | 416.576 | 125.763 | 351.163 | 125.763 | 98.39349 | 4.764332 | 1521.834 |
| 0.621198 | 1219.512 | 468.387 | 202.814 | 393.063 | 202.814 | 311.9337 | 7.613102 | 2064.278 |
| 1.584154 | 1113.703 | 482.577 | 139.954 | 429.346 | 139.954 | 256.7606 | 3.657492 | 1909.23  |
| 0.082527 | 1290.431 | 569.334 | 129.365 | 564.797 | 129.365 | 222.9399 | 2.51953  | 2007.912 |
| 1.601962 | 1072.172 | 436.875 | 137.997 | 384.836 | 137.997 | 218.33   | 14.04217 | 963.5971 |
| -1.4519  | 1086.461 | 453.6   | 123.568 | 373.129 | 150.863 | 340.6455 | 9.196588 | 2278.729 |
| 1.154319 | 1069.139 | 395.328 | 155.942 | 377.332 | 155.942 | 99.84711 | 3.078826 | 1649.392 |
| 1.601962 | 1072.172 | 436.875 | 137.997 | 384.836 | 137.997 | 218.33   | 14.04217 | 963.5971 |
| 0.437352 | 1192.216 | 424.53  | 193.203 | 358.705 | 193.203 | 346.348  | 3.354737 | 2021.434 |
| 1.601962 | 1072.172 | 436.875 | 137.997 | 384.836 | 137.997 | 218.33   | 14.04217 | 963.5971 |
| 1.222846 | 1081.288 | 481.4   | 110.162 | 440.515 | 110.162 | 138.7071 | 2.50683  | 1815.574 |
| -0.16976 | 1173.229 | 429.033 | 154.596 | 419.01  | 170.398 | 324.8262 | 4.430806 | 1452.51  |
| -0.16976 | 1173.229 | 429.033 | 154.596 | 419.01  | 170.398 | 324.8262 | 4.430806 | 1452.51  |
| -0.16976 | 1173.229 | 429.033 | 154.596 | 419.01  | 170.398 | 324.8262 | 4.430806 | 1452.51  |
| 6.802302 | 1272.427 | 502.081 | 162.056 | 449.659 | 195.962 | 499.9418 | 1.755741 | 1653.932 |
| 16.66705 | 1638.333 | 620.346 | 275.441 | 543.848 | 283.835 | 581.6044 | 5.521491 | 1480.118 |
| 0.914132 | 1169.055 | 429.019 | 168.008 | 424.65  | 168.008 | 169.8027 | 1.355794 | 1924.805 |
| 1.222846 | 1081.288 | 481.4   | 110.162 | 440.515 | 110.162 | 138.7071 | 2.50683  | 1815.574 |
| 1.689896 | 977.137  | 384.824 | 146.945 | 333.587 | 146.945 | 106.5691 | 4.151762 | 1547.465 |
| 1.250885 | 1300.403 | 531.24  | 183.097 | 512.437 | 183.097 | 332.2233 | 16.70643 | 1434.77  |
| 0.621198 | 1219.512 | 468.387 | 202.814 | 393.063 | 202.814 | 311.9337 | 7.613102 | 2064.278 |
| 10.41302 | 1107.858 | 399.833 | 144.454 | 360.669 | 180.515 | 442.1107 | 8.673082 | 1871.338 |

Table S2 - Anonymized database

|          |          |         |         |         |         |          |          |          |
|----------|----------|---------|---------|---------|---------|----------|----------|----------|
| 1.222846 | 1081.288 | 481.4   | 110.162 | 440.515 | 110.162 | 138.7071 | 2.50683  | 1815.574 |
| 16.66705 | 1638.333 | 620.346 | 275.441 | 543.848 | 283.835 | 581.6044 | 5.521491 | 1480.118 |
| 1.222846 | 1081.288 | 481.4   | 110.162 | 440.515 | 110.162 | 138.7071 | 2.50683  | 1815.574 |
| 0.816011 | 1260.301 | 478.654 | 184.986 | 452.367 | 184.986 | 311.8525 | 9.304274 | 2253.092 |
| 1.601962 | 1072.172 | 436.875 | 137.997 | 384.836 | 137.997 | 218.33   | 14.04217 | 963.5971 |
| 0.437352 | 1192.216 | 424.53  | 193.203 | 358.705 | 193.203 | 346.348  | 3.354737 | 2021.434 |
| 1.603604 | 1039.627 | 370.788 | 151.062 | 360.051 | 151.062 | 118.0156 | 12.89384 | 1712.243 |
| 19.98208 | 1282.251 | 428.942 | 199.648 | 282.135 | 301.821 | 261.3956 | 2.788267 | 1863.578 |
| 19.98208 | 1282.251 | 428.942 | 199.648 | 282.135 | 301.821 | 261.3956 | 2.788267 | 1863.578 |
| 0.437352 | 1192.216 | 424.53  | 193.203 | 358.705 | 193.203 | 346.348  | 3.354737 | 2021.434 |
| -0.16976 | 1173.229 | 429.033 | 154.596 | 419.01  | 170.398 | 324.8262 | 4.430806 | 1452.51  |
| 1.309764 | 1202.427 | 471.813 | 175.725 | 450.776 | 175.725 | 302.5654 | 5.50175  | 1736.775 |
| 0.082527 | 1290.431 | 569.334 | 129.365 | 564.797 | 129.365 | 222.9399 | 2.51953  | 2007.912 |
| 10.41302 | 1107.858 | 399.833 | 144.454 | 360.669 | 180.515 | 442.1107 | 8.673082 | 1871.338 |
| 8.643956 | 1438.028 | 548.298 | 229.766 | 513.314 | 249.796 | 663.8906 | 3.372374 | 2187.516 |
| 1.222846 | 1081.288 | 481.4   | 110.162 | 440.515 | 110.162 | 138.7071 | 2.50683  | 1815.574 |
| 0.621198 | 1219.512 | 468.387 | 202.814 | 393.063 | 202.814 | 311.9337 | 7.613102 | 2064.278 |
| 0.715363 | 1169.376 | 440.42  | 164.323 | 432.232 | 164.323 | 214.8781 | 5.50378  | 1491.958 |
| 18.51983 | 1182.28  | 468.97  | 149.281 | 389.263 | 228.039 | 311.9507 | 4.48972  | 1438.063 |
| 0.913973 | 1173.967 | 450.496 | 167.028 | 431.8   | 167.028 | 252.7432 | 7.030299 | 2220.283 |
| -0.16976 | 1173.229 | 429.033 | 154.596 | 419.01  | 170.398 | 324.8262 | 4.430806 | 1452.51  |
| 1.34567  | 1036.298 | 416.576 | 125.763 | 351.163 | 125.763 | 98.39349 | 4.764332 | 1521.834 |
| 0.542005 | 1264.835 | 458.168 | 192.243 | 422.977 | 192.243 | 344.0219 | 8.271492 | 2272.567 |
| 1.34567  | 1036.298 | 416.576 | 125.763 | 351.163 | 125.763 | 98.39349 | 4.764332 | 1521.834 |
| 1.193769 | 1313.203 | 540.484 | 182.942 | 510.422 | 182.942 | 353.818  | 9.800788 | 2414.645 |
| 18.06966 | 1187.626 | 460.407 | 120.673 | 370.06  | 252.737 | 353.7827 | 1.677322 | 1845.688 |
| 1.222846 | 1081.288 | 481.4   | 110.162 | 440.515 | 110.162 | 138.7071 | 2.50683  | 1815.574 |
| 1.154319 | 1069.139 | 395.328 | 155.942 | 377.332 | 155.942 | 99.84711 | 3.078826 | 1649.392 |
| 1.34567  | 1036.298 | 416.576 | 125.763 | 351.163 | 125.763 | 98.39349 | 4.764332 | 1521.834 |
| 0.437352 | 1192.216 | 424.53  | 193.203 | 358.705 | 193.203 | 346.348  | 3.354737 | 2021.434 |
| -0.16976 | 1173.229 | 429.033 | 154.596 | 419.01  | 170.398 | 324.8262 | 4.430806 | 1452.51  |
| 0.851703 | 1355.105 | 492.748 | 223.249 | 415.345 | 223.249 | 344.9812 | 0.403961 | 1862.702 |
| 1.34567  | 1036.298 | 416.576 | 125.763 | 351.163 | 125.763 | 98.39349 | 4.764332 | 1521.834 |
| 1.222846 | 1081.288 | 481.4   | 110.162 | 440.515 | 110.162 | 138.7071 | 2.50683  | 1815.574 |
| 1.222846 | 1081.288 | 481.4   | 110.162 | 440.515 | 110.162 | 138.7071 | 2.50683  | 1815.574 |
| -1.4519  | 1086.461 | 453.6   | 123.568 | 373.129 | 150.863 | 340.6455 | 9.196588 | 2278.729 |
| 6.802302 | 1272.427 | 502.081 | 162.056 | 449.659 | 195.962 | 499.9418 | 1.755741 | 1653.932 |
| 1.222846 | 1081.288 | 481.4   | 110.162 | 440.515 | 110.162 | 138.7071 | 2.50683  | 1815.574 |
| 17.84441 | 1261.902 | 481.286 | 151.452 | 365.826 | 231.318 | 417.374  | 1.331445 | 1795.906 |
| 1.34567  | 1036.298 | 416.576 | 125.763 | 351.163 | 125.763 | 98.39349 | 4.764332 | 1521.834 |
| 1.28983  | 1198.578 | 501.065 | 158.017 | 491.325 | 158.017 | 83.46487 | 4.532743 | 1482.57  |
| 0.913973 | 1173.967 | 450.496 | 167.028 | 431.8   | 167.028 | 252.7432 | 7.030299 | 2220.283 |
| 0.913973 | 1173.967 | 450.496 | 167.028 | 431.8   | 167.028 | 252.7432 | 7.030299 | 2220.283 |
| 16.66705 | 1638.333 | 620.346 | 275.441 | 543.848 | 283.835 | 581.6044 | 5.521491 | 1480.118 |
| 1.222846 | 1081.288 | 481.4   | 110.162 | 440.515 | 110.162 | 138.7071 | 2.50683  | 1815.574 |
| 16.66705 | 1638.333 | 620.346 | 275.441 | 543.848 | 283.835 | 581.6044 | 5.521491 | 1480.118 |
| 0.437352 | 1192.216 | 424.53  | 193.203 | 358.705 | 193.203 | 346.348  | 3.354737 | 2021.434 |
| 0.278016 | 1231.077 | 450.28  | 214.251 | 388.43  | 214.251 | 350.8546 | 4.056374 | 2002.568 |
| 16.66705 | 1638.333 | 620.346 | 275.441 | 543.848 | 283.835 | 581.6044 | 5.521491 | 1480.118 |
| 1.222846 | 1081.288 | 481.4   | 110.162 | 440.515 | 110.162 | 138.7071 | 2.50683  | 1815.574 |

Table S2 - Anonymized database

|          |          |         |         |         |         |          |          |          |
|----------|----------|---------|---------|---------|---------|----------|----------|----------|
| 1.34567  | 1036.298 | 416.576 | 125.763 | 351.163 | 125.763 | 98.39349 | 4.764332 | 1521.834 |
| 0.437352 | 1192.216 | 424.53  | 193.203 | 358.705 | 193.203 | 346.348  | 3.354737 | 2021.434 |
| 1.309764 | 1202.427 | 471.813 | 175.725 | 450.776 | 175.725 | 302.5654 | 5.50175  | 1736.775 |
| 10.41302 | 1107.858 | 399.833 | 144.454 | 360.669 | 180.515 | 442.1107 | 8.673082 | 1871.338 |
| 1.34567  | 1036.298 | 416.576 | 125.763 | 351.163 | 125.763 | 98.39349 | 4.764332 | 1521.834 |
| 1.34567  | 1036.298 | 416.576 | 125.763 | 351.163 | 125.763 | 98.39349 | 4.764332 | 1521.834 |
| 18.31974 | 1205.787 | 450.19  | 167.266 | 347.842 | 213.155 | 342.0194 | 5.998885 | 1432.308 |
| 0.816011 | 1260.301 | 478.654 | 184.986 | 452.367 | 184.986 | 311.8525 | 9.304274 | 2253.092 |
| 0.082527 | 1290.431 | 569.334 | 129.365 | 564.797 | 129.365 | 222.9399 | 2.51953  | 2007.912 |
| 1.309764 | 1202.427 | 471.813 | 175.725 | 450.776 | 175.725 | 302.5654 | 5.50175  | 1736.775 |
| 1.601962 | 1072.172 | 436.875 | 137.997 | 384.836 | 137.997 | 218.33   | 14.04217 | 963.5971 |
| 0.913973 | 1173.967 | 450.496 | 167.028 | 431.8   | 167.028 | 252.7432 | 7.030299 | 2220.283 |
| 17.71124 | 1371.437 | 527.992 | 195.869 | 453.861 | 282.068 | 376.0003 | 5.043976 | 1765.235 |
| 0.771571 | 1197.382 | 458.126 | 182.4   | 415.096 | 182.4   | 326.7982 | 10.80945 | 1379.297 |
| 1.154319 | 1069.139 | 395.328 | 155.942 | 377.332 | 155.942 | 99.84711 | 3.078826 | 1649.392 |
| -1.68034 | 1121.098 | 416.359 | 203.313 | 357.376 | 203.313 | 444.7566 | 3.02755  | 1895.277 |
| 17.96497 | 1217.182 | 430.052 | 155.312 | 302.152 | 227.337 | 330.8731 | 0.217345 | 1789.407 |
| 0.851703 | 1355.105 | 492.748 | 223.249 | 415.345 | 223.249 | 344.9812 | 0.403961 | 1862.702 |
| 1.34567  | 1036.298 | 416.576 | 125.763 | 351.163 | 125.763 | 98.39349 | 4.764332 | 1521.834 |
| 0.520489 | 1214.764 | 431.146 | 202.207 | 358.102 | 202.207 | 314.7635 | 8.712111 | 2402.854 |
| 18.31974 | 1205.787 | 450.19  | 167.266 | 347.842 | 213.155 | 342.0194 | 5.998885 | 1432.308 |
| 0.542005 | 1264.835 | 458.168 | 192.243 | 422.977 | 192.243 | 344.0219 | 8.271492 | 2272.567 |
| 19.98208 | 1282.251 | 428.942 | 199.648 | 282.135 | 301.821 | 261.3956 | 2.788267 | 1863.578 |
| 1.34567  | 1036.298 | 416.576 | 125.763 | 351.163 | 125.763 | 98.39349 | 4.764332 | 1521.834 |
| -0.16976 | 1173.229 | 429.033 | 154.596 | 419.01  | 170.398 | 324.8262 | 4.430806 | 1452.51  |
| 17.84441 | 1261.902 | 481.286 | 151.452 | 365.826 | 231.318 | 417.374  | 1.331445 | 1795.906 |
| 1.193769 | 1313.203 | 540.484 | 182.942 | 510.422 | 182.942 | 353.818  | 9.800788 | 2414.645 |
| 1.601962 | 1072.172 | 436.875 | 137.997 | 384.836 | 137.997 | 218.33   | 14.04217 | 963.5971 |
| 0.913973 | 1173.967 | 450.496 | 167.028 | 431.8   | 167.028 | 252.7432 | 7.030299 | 2220.283 |
| 18.31974 | 1205.787 | 450.19  | 167.266 | 347.842 | 213.155 | 342.0194 | 5.998885 | 1432.308 |
| 18.31974 | 1205.787 | 450.19  | 167.266 | 347.842 | 213.155 | 342.0194 | 5.998885 | 1432.308 |
| 0.082527 | 1290.431 | 569.334 | 129.365 | 564.797 | 129.365 | 222.9399 | 2.51953  | 2007.912 |
| 0.437352 | 1192.216 | 424.53  | 193.203 | 358.705 | 193.203 | 369.287  | 5.148047 | 1885.585 |
| -0.16976 | 1173.229 | 429.033 | 154.596 | 419.01  | 170.398 | 324.8262 | 4.430806 | 1452.51  |
| 17.96497 | 1217.182 | 430.052 | 155.312 | 302.152 | 227.337 | 330.8731 | 0.217345 | 1789.407 |
| 1.222846 | 1081.288 | 481.4   | 110.162 | 440.515 | 110.162 | 138.7071 | 2.50683  | 1815.574 |
| 0.621198 | 1219.512 | 468.387 | 202.814 | 393.063 | 202.814 | 311.9337 | 7.613102 | 2064.278 |
| 18.51983 | 1182.28  | 468.97  | 149.281 | 389.263 | 228.039 | 311.9507 | 4.48972  | 1438.063 |
| 18.31974 | 1205.787 | 450.19  | 167.266 | 347.842 | 213.155 | 342.0194 | 5.998885 | 1432.308 |
| 1.601962 | 1072.172 | 436.875 | 137.997 | 384.836 | 137.997 | 218.33   | 14.04217 | 963.5971 |
| 1.154319 | 1069.139 | 395.328 | 155.942 | 377.332 | 155.942 | 99.84711 | 3.078826 | 1649.392 |
| 1.222846 | 1081.288 | 481.4   | 110.162 | 440.515 | 110.162 | 138.7071 | 2.50683  | 1815.574 |
| 0.851703 | 1355.105 | 492.748 | 223.249 | 415.345 | 223.249 | 344.9812 | 0.403961 | 1862.702 |
| -0.16976 | 1173.229 | 429.033 | 154.596 | 419.01  | 170.398 | 324.8262 | 4.430806 | 1452.51  |
| 18.06966 | 1187.626 | 460.407 | 120.673 | 370.06  | 252.737 | 353.7827 | 1.677322 | 1845.688 |
| 1.222846 | 1081.288 | 481.4   | 110.162 | 440.515 | 110.162 | 138.7071 | 2.50683  | 1815.574 |
| -0.16976 | 1173.229 | 429.033 | 154.596 | 419.01  | 170.398 | 324.8262 | 4.430806 | 1452.51  |
| 1.34567  | 1036.298 | 416.576 | 125.763 | 351.163 | 125.763 | 98.39349 | 4.764332 | 1521.834 |
| -0.16976 | 1173.229 | 429.033 | 154.596 | 419.01  | 170.398 | 324.8262 | 4.430806 | 1452.51  |
| -0.16976 | 1173.229 | 429.033 | 154.596 | 419.01  | 170.398 | 324.8262 | 4.430806 | 1452.51  |

Table S2 - Anonymized database

|          |          |         |         |         |         |          |          |          |
|----------|----------|---------|---------|---------|---------|----------|----------|----------|
| 0.771571 | 1197.382 | 458.126 | 182.4   | 415.096 | 182.4   | 326.7982 | 10.80945 | 1379.297 |
| 18.51983 | 1182.28  | 468.97  | 149.281 | 389.263 | 228.039 | 311.9507 | 4.48972  | 1438.063 |
| 16.66705 | 1638.333 | 620.346 | 275.441 | 543.848 | 283.835 | 581.6044 | 5.521491 | 1480.118 |
| 0.082527 | 1290.431 | 569.334 | 129.365 | 564.797 | 129.365 | 222.9399 | 2.51953  | 2007.912 |
| 1.601962 | 1072.172 | 436.875 | 137.997 | 384.836 | 137.997 | 218.33   | 14.04217 | 963.5971 |
| 1.222846 | 1081.288 | 481.4   | 110.162 | 440.515 | 110.162 | 138.7071 | 2.50683  | 1815.574 |
| -1.24171 | 1063.862 | 365.344 | 157.394 | 355.954 | 171.554 | 358.2814 | 3.191571 | 1939.405 |
| 0.771571 | 1197.382 | 458.126 | 182.4   | 415.096 | 182.4   | 326.7982 | 10.80945 | 1379.297 |
| 18.51983 | 1182.28  | 468.97  | 149.281 | 389.263 | 228.039 | 311.9507 | 4.48972  | 1438.063 |
| 1.918511 | 1053.9   | 391.572 | 139.722 | 345.5   | 139.722 | 259.744  | 7.931207 | 1889.531 |
| 1.620286 | 1046.792 | 412.833 | 141.234 | 346.007 | 141.234 | 82.30245 | 4.124621 | 1880.85  |
| 1.222846 | 1081.288 | 481.4   | 110.162 | 440.515 | 110.162 | 138.7071 | 2.50683  | 1815.574 |
| -0.16976 | 1173.229 | 429.033 | 154.596 | 419.01  | 170.398 | 324.8262 | 4.430806 | 1452.51  |
| 16.66705 | 1638.333 | 620.346 | 275.441 | 543.848 | 283.835 | 581.6044 | 5.521491 | 1480.118 |
| 1.197742 | 1080.637 | 418.909 | 149.214 | 375.353 | 149.214 | 220.2656 | 6.243832 | 2323.249 |
| 1.34567  | 1036.298 | 416.576 | 125.763 | 351.163 | 125.763 | 98.39349 | 4.764332 | 1521.834 |
| 18.51983 | 1182.28  | 468.97  | 149.281 | 389.263 | 228.039 | 311.9507 | 4.48972  | 1438.063 |
| 1.34567  | 1036.298 | 416.576 | 125.763 | 351.163 | 125.763 | 98.39349 | 4.764332 | 1521.834 |
| 1.601962 | 1072.172 | 436.875 | 137.997 | 384.836 | 137.997 | 218.33   | 14.04217 | 963.5971 |
| -0.16976 | 1173.229 | 429.033 | 154.596 | 419.01  | 170.398 | 324.8262 | 4.430806 | 1452.51  |
| -0.16976 | 1173.229 | 429.033 | 154.596 | 419.01  | 170.398 | 324.8262 | 4.430806 | 1452.51  |
| 1.34567  | 1036.298 | 416.576 | 125.763 | 351.163 | 125.763 | 98.39349 | 4.764332 | 1521.834 |
| 0.913973 | 1173.967 | 450.496 | 167.028 | 431.8   | 167.028 | 252.7432 | 7.030299 | 2220.283 |
| 0.913973 | 1173.967 | 450.496 | 167.028 | 431.8   | 167.028 | 252.7432 | 7.030299 | 2220.283 |
| 0.520489 | 1214.764 | 431.146 | 202.207 | 358.102 | 202.207 | 314.7635 | 8.712111 | 2402.854 |
| 18.31974 | 1205.787 | 450.19  | 167.266 | 347.842 | 213.155 | 342.0194 | 5.998885 | 1432.308 |
| 1.34567  | 1036.298 | 416.576 | 125.763 | 351.163 | 125.763 | 98.39349 | 4.764332 | 1521.834 |
| 10.41302 | 1107.858 | 399.833 | 144.454 | 360.669 | 180.515 | 442.1107 | 8.673082 | 1871.338 |
| 1.601962 | 1072.172 | 436.875 | 137.997 | 384.836 | 137.997 | 218.33   | 14.04217 | 963.5971 |
| 18.06966 | 1187.626 | 460.407 | 120.673 | 370.06  | 252.737 | 353.7827 | 1.677322 | 1845.688 |
| 1.309764 | 1202.427 | 471.813 | 175.725 | 450.776 | 175.725 | 302.5654 | 5.50175  | 1736.775 |
| 17.96497 | 1217.182 | 430.052 | 155.312 | 302.152 | 227.337 | 330.8731 | 0.217345 | 1789.407 |
| 19.98208 | 1282.251 | 428.942 | 199.648 | 282.135 | 301.821 | 261.3956 | 2.788267 | 1863.578 |
| 0.771571 | 1197.382 | 458.126 | 182.4   | 415.096 | 182.4   | 326.7982 | 10.80945 | 1379.297 |
| 10.41302 | 1107.858 | 399.833 | 144.454 | 360.669 | 180.515 | 442.1107 | 8.673082 | 1871.338 |
| 12.07976 | 1683.682 | 592.625 | 305.189 | 507.767 | 402.879 | 92.29993 | 9.324022 | 1126.678 |
| -3.14471 | 1338.751 | 410.37  | 265.597 | 404.62  | 271.411 | 482.474  | 3.426512 | 1754.312 |
| 11.77305 | 1798.059 | 729.666 | 298.193 | 624.238 | 390.883 | 158.5528 | 2.500618 | 2028.029 |
| 1.527967 | 1593.369 | 653.504 | 239.989 | 652.947 | 263.645 | 222.4361 | 2.733181 | 1472.043 |
| 2.309527 | 1759.552 | 665.196 | 297.839 | 608.559 | 382.53  | 231.4455 | 5.869617 | 2064.344 |
| 1.980445 | 1420.531 | 451.953 | 284.108 | 376.634 | 292.057 | 415.1788 | 7.663112 | 2302.833 |
| 3.673863 | 1689.434 | 533.232 | 297.784 | 533.232 | 348.849 | 353.818  | 9.800788 | 2414.645 |
| 0.693659 | 1641.955 | 674.39  | 234.111 | 617.163 | 294.82  | 211.2159 | 8.984717 | 1305.867 |
| 3.224808 | 1725.185 | 734.304 | 267.716 | 605.522 | 351.814 | 118.4804 | 4.569775 | 1687.026 |
| 2.994984 | 1636.069 | 511.474 | 292.264 | 370.066 | 332.285 | 363.2772 | 6.386463 | 2184.072 |
| 1.165121 | 1758.55  | 773.716 | 260.25  | 620.897 | 324.493 | 240.9818 | 2.35066  | 1953.851 |
| -1.55404 | 1655.204 | 707.488 | 235.803 | 692.561 | 285.481 | 489.7062 | 3.59755  | 1702.217 |
| 9.255143 | 1650.811 | 552.766 | 309.093 | 552.766 | 317.585 | 384.1146 | 8.195766 | 2390.127 |
| 9.765038 | 1726.196 | 579.005 | 315.421 | 579.005 | 318.305 | 367.2032 | 9.372241 | 1854.878 |
| 1.36717  | 1631.658 | 686.213 | 240.917 | 561.508 | 319.077 | 161.0517 | 3.782925 | 1557.11  |



Table S2 - Anonymized database

|          |          |         |         |         |         |          |          |          |
|----------|----------|---------|---------|---------|---------|----------|----------|----------|
| 4.306681 | 1669.886 | 546.443 | 290.398 | 461.013 | 447.037 | 28.46955 | 0.679182 | 1846.094 |
| 0.977159 | 1594.237 | 664.744 | 241.42  | 613.571 | 280.445 | 344.4803 | 2.282428 | 1975.805 |
| 2.775    | 1706.642 | 622.925 | 269.626 | 594.823 | 367.238 | 151.6085 | 3.044361 | 1695.477 |
| 3.082264 | 1841.716 | 765.463 | 299.75  | 657.881 | 389.15  | 187.7079 | 2.024981 | 2018.113 |
| 2.602055 | 1673.899 | 547.323 | 330.145 | 481.046 | 374.802 | 161.7074 | 3.475744 | 1856.403 |
| 1.495863 | 1907.282 | 690.445 | 334.487 | 517.025 | 436.375 | 148.2937 | 1.099489 | 1699.062 |
| 2.92322  | 1869.494 | 701.625 | 331.039 | 646.369 | 378.381 | 118.1115 | 1.501855 | 1862.66  |
| 3.078527 | 1709.982 | 751.458 | 244.056 | 643.587 | 367.179 | 191.9448 | 3.036096 | 2134.077 |
| 3.312335 | 1748.048 | 605.137 | 330.629 | 521.998 | 401.257 | 121.9577 | 2.032796 | 1891.805 |
| 10.2139  | 1949.674 | 754.498 | 311.599 | 738.447 | 399.291 | 126.3232 | 4.08183  | 1849.596 |
| 0.089544 | 1624.298 | 659.248 | 248.595 | 629.329 | 291.427 | 367.653  | 6.092455 | 2268.084 |
| -1.24902 | 1802.949 | 615.544 | 299.283 | 536.595 | 299.283 | 367.5201 | 5.641701 | 2122.695 |
| -1.72355 | 1358.596 | 581.878 | 172.581 | 523.931 | 235.866 | 693.117  | 3.449864 | 1538.647 |
| 2.861005 | 1876.506 | 770.783 | 302.223 | 712.595 | 376.309 | 131.5466 | 7.098525 | 1302.395 |
| 10.2139  | 1949.674 | 754.498 | 311.599 | 738.447 | 399.291 | 126.3232 | 4.08183  | 1849.596 |
| 3.539126 | 1680.951 | 554.388 | 288.569 | 403.414 | 299.121 | 317.2497 | 11.81392 | 959.2725 |
| 3.078527 | 1709.982 | 751.458 | 244.056 | 643.587 | 367.179 | 191.9448 | 3.036096 | 2134.077 |
| 1.165121 | 1758.55  | 773.716 | 260.25  | 620.897 | 324.493 | 240.9818 | 2.35066  | 1953.851 |
| 1.527967 | 1593.369 | 653.504 | 239.989 | 652.947 | 263.645 | 222.4361 | 2.733181 | 1472.043 |
| 1.517253 | 1619.106 | 647.824 | 248.946 | 647.824 | 267.039 | 330.4612 | 5.314943 | 2050.618 |
| 3.269582 | 1761.512 | 673.087 | 252.466 | 580.927 | 351.081 | 186.2722 | 14.29552 | 2568.046 |
| 3.191758 | 1749.745 | 600.434 | 315.678 | 581.92  | 364.259 | 71.10771 | 0.571329 | 1809.155 |
| 0.057346 | 1641.624 | 688.454 | 233.49  | 652.575 | 304.641 | 423.5338 | 15.46822 | 1331.014 |
| 2.739203 | 1760.081 | 718.746 | 280.373 | 654.203 | 347.181 | 162.8161 | 1.964231 | 1741.297 |
| 2.515495 | 1766.287 | 753.767 | 272.141 | 674.837 | 333.336 | 147.7344 | 2.213931 | 1994.002 |
| 1.314016 | 1682.612 | 746.082 | 207.825 | 675.088 | 320.78  | 172.1728 | 4.648338 | 2040.351 |
| 0.693659 | 1641.955 | 674.39  | 234.111 | 617.163 | 294.82  | 211.2159 | 8.984717 | 1305.867 |
| 12.69676 | 1795.836 | 596.635 | 330.645 | 435.48  | 447.855 | 87.46478 | 2.164512 | 1745.672 |
| 3.224808 | 1725.185 | 734.304 | 267.716 | 605.522 | 351.814 | 118.4804 | 4.569775 | 1687.026 |
| 9.674176 | 1677.047 | 747.362 | 233.006 | 715.846 | 287.275 | 500.629  | 1.819382 | 1815.314 |
| 3.078527 | 1709.982 | 751.458 | 244.056 | 643.587 | 367.179 | 191.9448 | 3.036096 | 2134.077 |
| 0.693659 | 1641.955 | 674.39  | 234.111 | 617.163 | 294.82  | 211.2159 | 8.984717 | 1305.867 |
| 9.674176 | 1677.047 | 747.362 | 233.006 | 715.846 | 287.275 | 500.629  | 1.819382 | 1815.314 |
| 3.078527 | 1709.982 | 751.458 | 244.056 | 643.587 | 367.179 | 191.9448 | 3.036096 | 2134.077 |
| 1.165121 | 1758.55  | 773.716 | 260.25  | 620.897 | 324.493 | 240.9818 | 2.35066  | 1953.851 |
| -2.73457 | 1690.79  | 575.959 | 263.325 | 529.174 | 263.325 | 602.6755 | 10.18564 | 2336.094 |
| 10.2139  | 1949.674 | 754.498 | 311.599 | 738.447 | 399.291 | 126.3232 | 4.08183  | 1849.596 |
| 9.674176 | 1677.047 | 747.362 | 233.006 | 715.846 | 287.275 | 500.629  | 1.819382 | 1815.314 |
| 2.861005 | 1876.506 | 770.783 | 302.223 | 712.595 | 376.309 | 131.5466 | 7.098525 | 1302.395 |
| -2.32548 | 1444.681 | 448.344 | 270.455 | 395.367 | 270.455 | 330.781  | 0.599844 | 1782.226 |
| -0.54135 | 1745.066 | 603.212 | 306.222 | 572.405 | 308.373 | 294.5679 | 3.569889 | 2092.734 |
| -2.0658  | 1737.211 | 552.653 | 308.083 | 492.523 | 308.083 | 559.32   | 6.887537 | 1658.008 |
| 2.515495 | 1766.287 | 753.767 | 272.141 | 674.837 | 333.336 | 147.7344 | 2.213931 | 1994.002 |
| 0.977159 | 1594.237 | 664.744 | 241.42  | 613.571 | 280.445 | 344.4803 | 2.282428 | 1975.805 |
| 2.994984 | 1636.069 | 511.474 | 292.264 | 370.066 | 332.285 | 363.2772 | 6.386463 | 2184.072 |
| 1.165121 | 1758.55  | 773.716 | 260.25  | 620.897 | 324.493 | 240.9818 | 2.35066  | 1953.851 |
| 9.714725 | 2126.397 | 975.95  | 282.783 | 975.95  | 390.961 | 197.695  | 5.642335 | 2223.441 |
| 3.078527 | 1709.982 | 751.458 | 244.056 | 643.587 | 367.179 | 191.9448 | 3.036096 | 2134.077 |
| 1.599203 | 1874.653 | 773.233 | 277.26  | 704.633 | 364.567 | 427.536  | 23.76717 | 3358.25  |
| 3.078527 | 1709.982 | 751.458 | 244.056 | 643.587 | 367.179 | 191.9448 | 3.036096 | 2134.077 |

Table S2 - Anonymized database

|          |          |         |         |         |         |          |          |          |
|----------|----------|---------|---------|---------|---------|----------|----------|----------|
| -2.48813 | 1431.669 | 416.868 | 267.291 | 405.63  | 267.291 | 379.0812 | 2.998592 | 1846.541 |
| 0.977159 | 1594.237 | 664.744 | 241.42  | 613.571 | 280.445 | 344.4803 | 2.282428 | 1975.805 |
| 9.255143 | 1650.811 | 552.766 | 309.093 | 552.766 | 317.585 | 384.1146 | 8.195766 | 2390.127 |
| 1.527967 | 1593.369 | 653.504 | 239.989 | 652.947 | 263.645 | 222.4361 | 2.733181 | 1472.043 |
| 3.224808 | 1725.185 | 734.304 | 267.716 | 605.522 | 351.814 | 118.4804 | 4.569775 | 1687.026 |
| -2.66538 | 1472.877 | 466.147 | 269.666 | 425.297 | 269.666 | 385.9416 | 16.94996 | 446.4642 |
| 0.977159 | 1594.237 | 664.744 | 241.42  | 613.571 | 280.445 | 344.4803 | 2.282428 | 1975.805 |
| -2.15702 | 1375.056 | 425.211 | 233.701 | 379.362 | 233.701 | 347.2733 | 4.467479 | 2075.471 |
| 1.495863 | 1907.282 | 690.445 | 334.487 | 517.025 | 436.375 | 148.2937 | 1.099489 | 1699.062 |
| -0.9291  | 1498.215 | 648.835 | 172.608 | 624.047 | 236.998 | 318.5292 | 13.84482 | 1524.968 |
| 3.261434 | 1879.834 | 690.801 | 311.902 | 627.259 | 388.914 | 65.92776 | 4.091606 | 1768.229 |
| 2.994984 | 1636.069 | 511.474 | 292.264 | 370.066 | 332.285 | 363.2772 | 6.386463 | 2184.072 |
| 7.99656  | 1601.338 | 515.562 | 279.154 | 513.384 | 337.386 | 388.4849 | 0.546904 | 1860.972 |
| 0.537049 | 1707.55  | 650.433 | 286.152 | 619.503 | 305.673 | 365.2663 | 8.606683 | 2248.623 |
| 3.078527 | 1709.982 | 751.458 | 244.056 | 643.587 | 367.179 | 191.9448 | 3.036096 | 2134.077 |
| -3.14471 | 1338.751 | 410.37  | 265.597 | 404.62  | 271.411 | 482.474  | 3.426512 | 1754.312 |
| 2.994984 | 1636.069 | 511.474 | 292.264 | 370.066 | 332.285 | 363.2772 | 6.386463 | 2184.072 |
| 3.539126 | 1680.951 | 554.388 | 288.569 | 403.414 | 299.121 | 317.2497 | 11.81392 | 959.2725 |
| 10.2139  | 1949.674 | 754.498 | 311.599 | 738.447 | 399.291 | 126.3232 | 4.08183  | 1849.596 |
| 1.599203 | 1874.653 | 773.233 | 277.26  | 704.633 | 364.567 | 427.536  | 23.76717 | 3358.25  |
| 10.3962  | 1656.738 | 540.026 | 292.239 | 499.881 | 349.794 | 288.6407 | 7.765498 | 2007.697 |
| 3.361176 | 1757.985 | 700.142 | 264.277 | 591.576 | 417.158 | 130.5054 | 1.396612 | 1963.494 |
| 0.940978 | 1742.635 | 716.934 | 292.411 | 568.432 | 345.087 | 306.2375 | 0.923596 | 1703.135 |
| 1.599203 | 1874.653 | 773.233 | 277.26  | 704.633 | 364.567 | 427.536  | 23.76717 | 3358.25  |
| 3.078527 | 1709.982 | 751.458 | 244.056 | 643.587 | 367.179 | 191.9448 | 3.036096 | 2134.077 |
| 3.019214 | 1815.915 | 658.626 | 332.458 | 596.949 | 373.76  | 107.388  | 1.836803 | 1754.523 |
| -2.73457 | 1690.79  | 575.959 | 263.325 | 529.174 | 263.325 | 602.6755 | 10.18564 | 2336.094 |
| 3.078527 | 1709.982 | 751.458 | 244.056 | 643.587 | 367.179 | 191.9448 | 3.036096 | 2134.077 |
| 3.654016 | 1808.103 | 609.406 | 326.03  | 600.122 | 405.004 | 69.53417 | 3.856232 | 1601.942 |
| 10.2139  | 1949.674 | 754.498 | 311.599 | 738.447 | 399.291 | 126.3232 | 4.08183  | 1849.596 |
| 0.977159 | 1594.237 | 664.744 | 241.42  | 613.571 | 280.445 | 344.4803 | 2.282428 | 1975.805 |
| 3.269582 | 1761.512 | 673.087 | 252.466 | 580.927 | 351.081 | 186.2722 | 14.29552 | 2568.046 |
| 3.539126 | 1680.951 | 554.388 | 288.569 | 403.414 | 299.121 | 317.2497 | 11.81392 | 959.2725 |
| 11.32852 | 1866.229 | 735.493 | 293.782 | 613.172 | 407.25  | 250.0854 | 6.824211 | 2129.41  |
| 0.977159 | 1594.237 | 664.744 | 241.42  | 613.571 | 280.445 | 344.4803 | 2.282428 | 1975.805 |
| 3.284632 | 1766.656 | 726.812 | 251.065 | 605.233 | 355.336 | 142.9463 | 2.576109 | 1703.397 |
| 2.515495 | 1766.287 | 753.767 | 272.141 | 674.837 | 333.336 | 147.7344 | 2.213931 | 1994.002 |
| 0.977159 | 1594.237 | 664.744 | 241.42  | 613.571 | 280.445 | 344.4803 | 2.282428 | 1975.805 |
| 3.019214 | 1815.915 | 658.626 | 332.458 | 596.949 | 373.76  | 107.388  | 1.836803 | 1754.523 |
| 0.089544 | 1624.298 | 659.248 | 248.595 | 629.329 | 291.427 | 363.0986 | 3.370361 | 2047.03  |
| 9.827434 | 1638.509 | 525.536 | 266.242 | 525.536 | 358.351 | 378.9761 | 11.98303 | 2443.236 |
| 2.923692 | 1750.604 | 725.927 | 281.575 | 644.04  | 339.092 | 108.9301 | 0.270718 | 1853.959 |
| 2.92322  | 1869.494 | 701.625 | 331.039 | 646.369 | 378.381 | 118.1115 | 1.501855 | 1862.66  |
| 0.977159 | 1594.237 | 664.744 | 241.42  | 613.571 | 280.445 | 344.4803 | 2.282428 | 1975.805 |
| 12.86876 | 1716.21  | 581.786 | 322.215 | 480.047 | 430.242 | 85.72495 | 2.663779 | 1867.87  |
| -2.32548 | 1444.681 | 448.344 | 270.455 | 395.367 | 270.455 | 330.781  | 0.599844 | 1782.226 |
| 3.224808 | 1725.185 | 734.304 | 267.716 | 605.522 | 351.814 | 118.4804 | 4.569775 | 1687.026 |
| 2.844868 | 1735.468 | 596.5   | 332.033 | 537.819 | 364.987 | 99.84711 | 3.078826 | 1649.392 |
| 3.078527 | 1709.982 | 751.458 | 244.056 | 643.587 | 367.179 | 191.9448 | 3.036096 | 2134.077 |
| 3.019214 | 1815.915 | 658.626 | 332.458 | 596.949 | 373.76  | 107.388  | 1.836803 | 1754.523 |

Table S2 - Anonymized database

|          |          |         |         |         |         |          |          |          |
|----------|----------|---------|---------|---------|---------|----------|----------|----------|
| 9.759945 | 1571.422 | 502.145 | 278.226 | 468.865 | 346.317 | 338.9043 | 2.973717 | 1697.062 |
| 13.3792  | 1700.819 | 607.024 | 323.455 | 425.48  | 432.876 | 9.546456 | 0.136922 | 1877.606 |
| 9.765038 | 1726.196 | 579.005 | 315.421 | 579.005 | 318.305 | 367.2032 | 9.372241 | 1854.878 |
| 11.56054 | 1731.735 | 653     | 289.524 | 551.408 | 392.258 | 133.692  | 0.928783 | 1841.605 |
| 11.56054 | 1731.735 | 653     | 289.524 | 551.408 | 392.258 | 133.692  | 0.928783 | 1841.605 |
| 7.99656  | 1601.338 | 515.562 | 279.154 | 513.384 | 337.386 | 388.4849 | 0.546904 | 1860.972 |
| -0.98347 | 1482.361 | 509.542 | 255.363 | 437.681 | 289.916 | 443.7068 | 24.45277 | 9.84658  |
| 0.655505 | 1798.683 | 851.344 | 229.906 | 796.802 | 302.237 | 230.9364 | 4.226843 | 2008.737 |
| 1.599203 | 1874.653 | 773.233 | 277.26  | 704.633 | 364.567 | 427.536  | 23.76717 | 3358.25  |
| 10.22724 | 1567.866 | 501.406 | 274.268 | 463.839 | 342.907 | 344.3909 | 7.572275 | 1738.915 |
| 3.191758 | 1749.745 | 600.434 | 315.678 | 581.92  | 364.259 | 71.10771 | 0.571329 | 1809.155 |
| 2.775    | 1706.642 | 622.925 | 269.626 | 594.823 | 367.238 | 151.6085 | 3.044361 | 1695.477 |
| 13.3792  | 1700.819 | 607.024 | 323.455 | 425.48  | 432.876 | 9.546456 | 0.136922 | 1877.606 |
| 1.165121 | 1758.55  | 773.716 | 260.25  | 620.897 | 324.493 | 240.9818 | 2.35066  | 1953.851 |
| -2.55621 | 1415.638 | 491.994 | 259.568 | 371.713 | 269.072 | 398.2895 | 1.172895 | 1606.425 |
| 3.673863 | 1689.434 | 533.232 | 297.784 | 533.232 | 348.849 | 353.818  | 9.800788 | 2414.645 |
| -3.14471 | 1338.751 | 410.37  | 265.597 | 404.62  | 271.411 | 482.474  | 3.426512 | 1754.312 |
| 1.599203 | 1874.653 | 773.233 | 277.26  | 704.633 | 364.567 | 427.536  | 23.76717 | 3358.25  |
| 11.56054 | 1731.735 | 653     | 289.524 | 551.408 | 392.258 | 133.692  | 0.928783 | 1841.605 |
| 2.844868 | 1735.468 | 596.5   | 332.033 | 537.819 | 364.987 | 99.84711 | 3.078826 | 1649.392 |
| 0.693659 | 1641.955 | 674.39  | 234.111 | 617.163 | 294.82  | 211.2159 | 8.984717 | 1305.867 |
| 1.599203 | 1874.653 | 773.233 | 277.26  | 704.633 | 364.567 | 427.536  | 23.76717 | 3358.25  |
| 10.11392 | 1595.562 | 514.394 | 277.919 | 514.394 | 340.584 | 327.824  | 10.42236 | 2086.291 |
| 1.517253 | 1619.106 | 647.824 | 248.946 | 647.824 | 267.039 | 330.4612 | 5.314943 | 2050.618 |
| 0.893077 | 1718.605 | 712.982 | 287.465 | 568.043 | 350.714 | 345.0285 | 2.841131 | 1883.004 |
| 9.255143 | 1650.811 | 552.766 | 309.093 | 552.766 | 317.585 | 384.1146 | 8.195766 | 2390.127 |
| 7.493527 | 1732.353 | 675.805 | 294.739 | 618.215 | 369.921 | 105.9056 | 4.341443 | 1633.646 |
| 3.254396 | 1940.243 | 834.343 | 252.329 | 723.289 | 400.305 | 297.4856 | 4.78008  | 2179.6   |
| 0.057346 | 1641.624 | 688.454 | 233.49  | 652.575 | 304.641 | 423.5338 | 15.46822 | 1331.014 |
| 3.03844  | 1928.127 | 868.941 | 263.871 | 768.761 | 345.561 | 115.4449 | 3.68327  | 1941.253 |
| 10.2139  | 1949.674 | 754.498 | 311.599 | 738.447 | 399.291 | 126.3232 | 4.08183  | 1849.596 |
| 12.66181 | 1742.803 | 571.654 | 332.656 | 408.076 | 442.982 | 68.98592 | 0.954197 | 1861.581 |
| 3.034577 | 1756.874 | 629.997 | 322.861 | 564.549 | 354.739 | 45.35895 | 9.336276 | 1008.816 |
| -2.73457 | 1690.79  | 575.959 | 263.325 | 529.174 | 263.325 | 602.6755 | 10.18564 | 2336.094 |
| 0.977159 | 1594.237 | 664.744 | 241.42  | 613.571 | 280.445 | 344.4803 | 2.282428 | 1975.805 |
| 0.089544 | 1624.298 | 659.248 | 248.595 | 629.329 | 291.427 | 363.0986 | 3.370361 | 2047.03  |
| -0.03574 | 1728.667 | 592.558 | 281.159 | 459.295 | 297.488 | 321.0894 | 7.302571 | 1338.034 |
| -1.72355 | 1358.596 | 581.878 | 172.581 | 523.931 | 235.866 | 693.117  | 3.449864 | 1538.647 |
| -1.24902 | 1802.949 | 615.544 | 299.283 | 536.595 | 299.283 | 367.5201 | 5.641701 | 2122.695 |
| 12.69676 | 1795.836 | 596.635 | 330.645 | 435.48  | 447.855 | 87.46478 | 2.164512 | 1745.672 |
| 10.3962  | 1656.738 | 540.026 | 292.239 | 499.881 | 349.794 | 288.6407 | 7.765498 | 2007.697 |
| 11.40095 | 1777.769 | 639.072 | 310.748 | 491.146 | 400.351 | 109.0332 | 0.997501 | 1804.575 |
| 2.994984 | 1636.069 | 511.474 | 292.264 | 370.066 | 332.285 | 363.2772 | 6.386463 | 2184.072 |
| 3.082264 | 1841.716 | 765.463 | 299.75  | 657.881 | 389.15  | 187.7079 | 2.024981 | 2018.113 |
| -1.80219 | 1829.322 | 673.068 | 270.259 | 598.688 | 295.698 | 425.881  | 16.28463 | 2612.849 |
| -0.9291  | 1498.215 | 648.835 | 172.608 | 624.047 | 236.998 | 318.5292 | 13.84482 | 1524.968 |
| -0.54135 | 1745.066 | 603.212 | 306.222 | 572.405 | 308.373 | 294.5679 | 3.569889 | 2092.734 |
| 3.270945 | 1667.127 | 534.067 | 293.901 | 424.25  | 335.156 | 334.5434 | 9.641643 | 1425.432 |
| 3.082264 | 1841.716 | 765.463 | 299.75  | 657.881 | 389.15  | 187.7079 | 2.024981 | 2018.113 |
| -1.72355 | 1358.596 | 581.878 | 172.581 | 523.931 | 235.866 | 693.117  | 3.449864 | 1538.647 |

Table S2 - Anonymized database

|          |          |         |         |         |         |          |          |          |
|----------|----------|---------|---------|---------|---------|----------|----------|----------|
| -0.03574 | 1728.667 | 592.558 | 281.159 | 459.295 | 297.488 | 321.0894 | 7.302571 | 1338.034 |
| -2.42617 | 1767.578 | 569.778 | 308.643 | 515.791 | 309.057 | 662.647  | 3.772194 | 2229.433 |
| 9.674176 | 1677.047 | 747.362 | 233.006 | 715.846 | 287.275 | 500.629  | 1.819382 | 1815.314 |
| 11.40095 | 1777.769 | 639.072 | 310.748 | 491.146 | 400.351 | 109.0332 | 0.997501 | 1804.575 |
| 1.108027 | 1624.28  | 625.868 | 268.403 | 625.868 | 274.827 | 369.4496 | 3.147714 | 1759.718 |
| 1.599203 | 1874.653 | 773.233 | 277.26  | 704.633 | 364.567 | 427.536  | 23.76717 | 3358.25  |
| 9.674176 | 1677.047 | 747.362 | 233.006 | 715.846 | 287.275 | 500.629  | 1.819382 | 1815.314 |
| 3.501115 | 1770.707 | 617.138 | 289.172 | 563.194 | 308.652 | 322.9681 | 4.351334 | 1582.188 |
| -0.54135 | 1745.066 | 603.212 | 306.222 | 572.405 | 308.373 | 294.5679 | 3.569889 | 2092.734 |
| 9.674176 | 1677.047 | 747.362 | 233.006 | 715.846 | 287.275 | 500.629  | 1.819382 | 1815.314 |
| 10.3962  | 1656.738 | 540.026 | 292.239 | 499.881 | 349.794 | 288.6407 | 7.765498 | 2007.697 |
| 0.977159 | 1594.237 | 664.744 | 241.42  | 613.571 | 280.445 | 344.4803 | 2.282428 | 1975.805 |
| 2.92322  | 1869.494 | 701.625 | 331.039 | 646.369 | 378.381 | 118.1115 | 1.501855 | 1862.66  |
| 2.67878  | 1857.64  | 776.54  | 295.668 | 720.464 | 376.505 | 139.6398 | 0.460311 | 1805.588 |
| -3.14471 | 1338.751 | 410.37  | 265.597 | 404.62  | 271.411 | 482.474  | 3.426512 | 1754.312 |
| 3.078527 | 1709.982 | 751.458 | 244.056 | 643.587 | 367.179 | 191.9448 | 3.036096 | 2134.077 |
| 0.057346 | 1641.624 | 688.454 | 233.49  | 652.575 | 304.641 | 423.5338 | 15.46822 | 1331.014 |
| 11.32852 | 1866.229 | 735.493 | 293.782 | 613.172 | 407.25  | 250.0854 | 6.824211 | 2129.41  |
| 0.057346 | 1641.624 | 688.454 | 233.49  | 652.575 | 304.641 | 423.5338 | 15.46822 | 1331.014 |
| 3.269582 | 1761.512 | 673.087 | 252.466 | 580.927 | 351.081 | 186.2722 | 14.29552 | 2568.046 |
| 3.270945 | 1667.127 | 534.067 | 293.901 | 424.25  | 335.156 | 334.5434 | 9.641643 | 1425.432 |
| 3.269582 | 1761.512 | 673.087 | 252.466 | 580.927 | 351.081 | 186.2722 | 14.29552 | 2568.046 |
| 2.966132 | 1738.862 | 720.904 | 276.289 | 636.563 | 334.732 | 153.333  | 4.875383 | 2212.881 |
| -0.8633  | 1752.065 | 718.955 | 260.487 | 570.262 | 362.782 | 302.8407 | 5.463532 | 1223.193 |
| 9.712044 | 1732.498 | 585.667 | 311.317 | 585.667 | 315.814 | 368.1078 | 3.085942 | 1998.603 |
| -3.14471 | 1338.751 | 410.37  | 265.597 | 404.62  | 271.411 | 482.474  | 3.426512 | 1754.312 |
| 1.778709 | 1995.365 | 772.682 | 326.285 | 701.46  | 438.144 | 177.847  | 2.773011 | 1576.339 |
| 3.078527 | 1709.982 | 751.458 | 244.056 | 643.587 | 367.179 | 191.9448 | 3.036096 | 2134.077 |
| 3.09322  | 1645.044 | 511.449 | 294.596 | 395.47  | 329.005 | 311.3914 | 3.386594 | 1645.39  |
| 1.980445 | 1420.531 | 451.953 | 284.108 | 376.634 | 292.057 | 415.1788 | 7.663112 | 2302.833 |
| 2.923692 | 1750.604 | 725.927 | 281.575 | 644.04  | 339.092 | 108.9301 | 0.270718 | 1853.959 |
| -0.9291  | 1498.215 | 648.835 | 172.608 | 624.047 | 236.998 | 318.5292 | 13.84482 | 1524.968 |
| 13.06402 | 1796.584 | 616.989 | 330.372 | 463.305 | 444.109 | 67.57873 | 4.980977 | 1515.009 |
| 7.75183  | 1744.123 | 686.263 | 290.613 | 624.057 | 366.899 | 96.70383 | 4.908966 | 1559.2   |
| -2.48813 | 1431.669 | 416.868 | 267.291 | 405.63  | 267.291 | 379.0812 | 2.998592 | 1846.541 |
| 9.255143 | 1650.811 | 552.766 | 309.093 | 552.766 | 317.585 | 384.1146 | 8.195766 | 2390.127 |
| 2.99339  | 1736.133 | 670.84  | 291.367 | 566.046 | 393.127 | 178.8689 | 3.350492 | 1871.85  |
| -3.14471 | 1338.751 | 410.37  | 265.597 | 404.62  | 271.411 | 482.474  | 3.426512 | 1754.312 |
| 1.495863 | 1907.282 | 690.445 | 334.487 | 517.025 | 436.375 | 148.2937 | 1.099489 | 1699.062 |
| 0.977159 | 1594.237 | 664.744 | 241.42  | 613.571 | 280.445 | 344.4803 | 2.282428 | 1975.805 |
| -0.98347 | 1482.361 | 509.542 | 255.363 | 437.681 | 289.916 | 443.7068 | 24.45277 | 9.84658  |
| 7.493527 | 1732.353 | 675.805 | 294.739 | 618.215 | 369.921 | 105.9056 | 4.341443 | 1633.646 |
| 3.034577 | 1756.874 | 629.997 | 322.861 | 564.549 | 354.739 | 45.35895 | 9.336276 | 1008.816 |
| 3.224808 | 1725.185 | 734.304 | 267.716 | 605.522 | 351.814 | 118.4804 | 4.569775 | 1687.026 |
| 9.827434 | 1638.509 | 525.536 | 266.242 | 525.536 | 358.351 | 378.9761 | 11.98303 | 2443.236 |
| 10.3962  | 1656.738 | 540.026 | 292.239 | 499.881 | 349.794 | 288.6407 | 7.765498 | 2007.697 |
| -0.9291  | 1498.215 | 648.835 | 172.608 | 624.047 | 236.998 | 318.5292 | 13.84482 | 1524.968 |
| -0.8633  | 1752.065 | 718.955 | 260.487 | 570.262 | 362.782 | 302.8407 | 5.463532 | 1223.193 |
| 8.484687 | 1566.905 | 478.142 | 281.648 | 399.884 | 348.375 | 344.1273 | 8.791059 | 2300.894 |
| 1.517253 | 1619.106 | 647.824 | 248.946 | 647.824 | 267.039 | 330.4612 | 5.314943 | 2050.618 |

Table S2 - Anonymized database

|          |          |         |         |         |         |          |          |          |
|----------|----------|---------|---------|---------|---------|----------|----------|----------|
| 9.255143 | 1650.811 | 552.766 | 309.093 | 552.766 | 317.585 | 384.1146 | 8.195766 | 2390.127 |
| 10.09323 | 1722.892 | 566.342 | 274.754 | 566.342 | 353.188 | 272.5588 | 7.12005  | 2301.675 |
| 12.19463 | 1690.914 | 540.209 | 315.174 | 420.553 | 427.2   | 117.4134 | 4.922527 | 1843.187 |
| 2.658973 | 1857.823 | 804.853 | 282.122 | 769.688 | 368.375 | 163.24   | 0.627206 | 1907.193 |
| 11.64161 | 1855.697 | 761.546 | 284.142 | 679.693 | 395.206 | 119.5475 | 4.079675 | 1512.646 |
| 3.019214 | 1815.915 | 658.626 | 332.458 | 596.949 | 373.76  | 62.67819 | 6.543175 | 1760.891 |
| 3.269582 | 1761.512 | 673.087 | 252.466 | 580.927 | 351.081 | 186.2722 | 14.29552 | 2568.046 |
| -2.48813 | 1431.669 | 416.868 | 267.291 | 405.63  | 267.291 | 379.0812 | 2.998592 | 1846.541 |
| 10.11392 | 1595.562 | 514.394 | 277.919 | 514.394 | 340.584 | 327.824  | 10.42236 | 2086.291 |
| 3.165027 | 1786.812 | 722.962 | 244.536 | 616.051 | 363.824 | 176.3364 | 1.888108 | 1919.367 |
| 3.366198 | 1708.992 | 522.547 | 336.275 | 466.573 | 407.951 | 98.54894 | 0.803851 | 1818.95  |
| 1.068066 | 1644.372 | 676.736 | 255.604 | 540.952 | 328.193 | 187.6075 | 5.691956 | 1343.706 |
| -0.8633  | 1752.065 | 718.955 | 260.487 | 570.262 | 362.782 | 302.8407 | 5.463532 | 1223.193 |
| 3.224808 | 1725.185 | 734.304 | 267.716 | 605.522 | 351.814 | 118.4804 | 4.569775 | 1687.026 |
| 2.966132 | 1738.862 | 720.904 | 276.289 | 636.563 | 334.732 | 153.333  | 4.875383 | 2212.881 |
| 9.759945 | 1571.422 | 502.145 | 278.226 | 468.865 | 346.317 | 338.9043 | 2.973717 | 1697.062 |
| -3.14471 | 1338.751 | 410.37  | 265.597 | 404.62  | 271.411 | 482.474  | 3.426512 | 1754.312 |
| 10.22724 | 1567.866 | 501.406 | 274.268 | 463.839 | 342.907 | 344.3909 | 7.572275 | 1738.915 |
| 3.702681 | 1741.133 | 640.872 | 271.713 | 560.119 | 436.985 | 100.9892 | 8.350395 | 2369.271 |
| -1.72355 | 1358.596 | 581.878 | 172.581 | 523.931 | 235.866 | 693.117  | 3.449864 | 1538.647 |
| 3.312335 | 1748.048 | 605.137 | 330.629 | 521.998 | 401.257 | 121.9577 | 2.032796 | 1891.805 |
| 11.32852 | 1866.229 | 735.493 | 293.782 | 613.172 | 407.25  | 250.0854 | 6.824211 | 2129.41  |
| 2.844868 | 1735.468 | 596.5   | 332.033 | 537.819 | 364.987 | 99.84711 | 3.078826 | 1649.392 |
| 2.793099 | 1680.525 | 640.494 | 253.498 | 580.599 | 350.649 | 214.722  | 3.836843 | 1629.528 |
| 10.12959 | 1638.506 | 522.081 | 270.148 | 522.081 | 357.382 | 313.4054 | 11.75299 | 1418.11  |
| 0.977159 | 1594.237 | 664.744 | 241.42  | 613.571 | 280.445 | 344.4803 | 2.282428 | 1975.805 |
| -2.64582 | 1464.559 | 458.745 | 257.359 | 414.643 | 257.359 | 411.3077 | 1.967308 | 1620.276 |
| 3.539126 | 1680.951 | 554.388 | 288.569 | 403.414 | 299.121 | 317.2497 | 11.81392 | 959.2725 |
| 7.99656  | 1601.338 | 515.562 | 279.154 | 513.384 | 337.386 | 388.4849 | 0.546904 | 1860.972 |
| 2.994984 | 1636.069 | 511.474 | 292.264 | 370.066 | 332.285 | 363.2772 | 6.386463 | 2184.072 |
| 11.56054 | 1731.735 | 653     | 289.524 | 551.408 | 392.258 | 133.692  | 0.928783 | 1841.605 |
| 2.67878  | 1857.64  | 776.54  | 295.668 | 720.464 | 376.505 | 139.6398 | 0.460311 | 1805.588 |
| 9.255143 | 1650.811 | 552.766 | 309.093 | 552.766 | 317.585 | 384.1146 | 8.195766 | 2390.127 |
| -1.80219 | 1829.322 | 673.068 | 270.259 | 598.688 | 295.698 | 425.881  | 16.28463 | 2612.849 |
| 11.32852 | 1866.229 | 735.493 | 293.782 | 613.172 | 407.25  | 250.0854 | 6.824211 | 2129.41  |
| 2.99339  | 1736.133 | 670.84  | 291.367 | 566.046 | 393.127 | 178.8689 | 3.350492 | 1871.85  |
| -0.98347 | 1482.361 | 509.542 | 255.363 | 437.681 | 289.916 | 443.7068 | 24.45277 | 9.84658  |
| 0.977159 | 1594.237 | 664.744 | 241.42  | 613.571 | 280.445 | 344.4803 | 2.282428 | 1975.805 |
| 2.99339  | 1736.133 | 670.84  | 291.367 | 566.046 | 393.127 | 178.8689 | 3.350492 | 1871.85  |
| -0.8633  | 1752.065 | 718.955 | 260.487 | 570.262 | 362.782 | 302.8407 | 5.463532 | 1223.193 |
| -1.72355 | 1358.596 | 581.878 | 172.581 | 523.931 | 235.866 | 693.117  | 3.449864 | 1538.647 |
| 2.844868 | 1735.468 | 596.5   | 332.033 | 537.819 | 364.987 | 99.84711 | 3.078826 | 1649.392 |
| 3.082264 | 1841.716 | 765.463 | 299.75  | 657.881 | 389.15  | 187.7079 | 2.024981 | 2018.113 |
| 3.501115 | 1770.707 | 617.138 | 289.172 | 563.194 | 308.652 | 322.9681 | 4.351334 | 1582.188 |
| 7.493527 | 1732.353 | 675.805 | 294.739 | 618.215 | 369.921 | 105.9056 | 4.341443 | 1633.646 |
| 3.03844  | 1928.127 | 868.941 | 263.871 | 768.761 | 345.561 | 115.4449 | 3.68327  | 1941.253 |
| 3.361176 | 1757.985 | 700.142 | 264.277 | 591.576 | 417.158 | 130.5054 | 1.396612 | 1963.494 |
| 2.045709 | 1716.124 | 701.845 | 242.792 | 614.784 | 306.751 | 288.6531 | 13.5198  | 1038.656 |
| -1.72355 | 1358.596 | 581.878 | 172.581 | 523.931 | 235.866 | 693.117  | 3.449864 | 1538.647 |
| 3.224808 | 1725.185 | 734.304 | 267.716 | 605.522 | 351.814 | 118.4804 | 4.569775 | 1687.026 |

Table S2 - Anonymized database

|          |          |         |         |         |         |          |          |          |
|----------|----------|---------|---------|---------|---------|----------|----------|----------|
| 2.844868 | 1735.468 | 596.5   | 332.033 | 537.819 | 364.987 | 99.84711 | 3.078826 | 1649.392 |
| -0.1882  | 1614.638 | 664.352 | 245.667 | 619.388 | 295.482 | 380.8375 | 4.070759 | 1519.568 |
| 0.940978 | 1742.635 | 716.934 | 292.411 | 568.432 | 345.087 | 306.2375 | 0.923596 | 1703.135 |
| -0.9291  | 1498.215 | 648.835 | 172.608 | 624.047 | 236.998 | 318.5292 | 13.84482 | 1524.968 |
| 3.494104 | 1713.474 | 552.081 | 335.551 | 431.305 | 415.616 | 110.0355 | 1.325417 | 1893.37  |
| 3.078527 | 1709.982 | 751.458 | 244.056 | 643.587 | 367.179 | 191.9448 | 3.036096 | 2134.077 |
| 1.599203 | 1874.653 | 773.233 | 277.26  | 704.633 | 364.567 | 427.536  | 23.76717 | 3358.25  |
| 3.078527 | 1709.982 | 751.458 | 244.056 | 643.587 | 367.179 | 191.9448 | 3.036096 | 2134.077 |
| 3.254396 | 1940.243 | 834.343 | 252.329 | 723.289 | 400.305 | 297.4856 | 4.78008  | 2179.6   |
| -2.80929 | 1344.204 | 397.487 | 267.195 | 338.895 | 267.195 | 409.062  | 9.06532  | 2102.892 |
| 3.019214 | 1815.915 | 658.626 | 332.458 | 596.949 | 373.76  | 62.67819 | 6.543175 | 1760.891 |
| 2.67878  | 1857.64  | 776.54  | 295.668 | 720.464 | 376.505 | 139.6398 | 0.460311 | 1805.588 |
| 3.494104 | 1713.474 | 552.081 | 335.551 | 431.305 | 415.616 | 110.0355 | 1.325417 | 1893.37  |
| 3.539126 | 1680.951 | 554.388 | 288.569 | 403.414 | 299.121 | 317.2497 | 11.81392 | 959.2725 |
| 3.224808 | 1725.185 | 734.304 | 267.716 | 605.522 | 351.814 | 118.4804 | 4.569775 | 1687.026 |
| -3.14471 | 1338.751 | 410.37  | 265.597 | 404.62  | 271.411 | 482.474  | 3.426512 | 1754.312 |
| 1.599203 | 1874.653 | 773.233 | 277.26  | 704.633 | 364.567 | 427.536  | 23.76717 | 3358.25  |
| 0.977159 | 1594.237 | 664.744 | 241.42  | 613.571 | 280.445 | 344.4803 | 2.282428 | 1975.805 |
| 0.655505 | 1798.683 | 851.344 | 229.906 | 796.802 | 302.237 | 230.9364 | 4.226843 | 2008.737 |
| 11.32852 | 1866.229 | 735.493 | 293.782 | 613.172 | 407.25  | 250.0854 | 6.824211 | 2129.41  |
| 10.11392 | 1595.562 | 514.394 | 277.919 | 514.394 | 340.584 | 327.824  | 10.42236 | 2086.291 |
| 2.844868 | 1735.468 | 596.5   | 332.033 | 537.819 | 364.987 | 99.84711 | 3.078826 | 1649.392 |
| 2.844868 | 1735.468 | 596.5   | 332.033 | 537.819 | 364.987 | 99.84711 | 3.078826 | 1649.392 |
| 2.844868 | 1735.468 | 596.5   | 332.033 | 537.819 | 364.987 | 99.84711 | 3.078826 | 1649.392 |
| 3.539126 | 1680.951 | 554.388 | 288.569 | 403.414 | 299.121 | 317.2497 | 11.81392 | 959.2725 |
| 0.914473 | 1762.075 | 769.288 | 249.294 | 630.181 | 304.338 | 195.607  | 12.72143 | 1135.702 |
| 3.284632 | 1766.656 | 726.812 | 251.065 | 605.233 | 355.336 | 142.9463 | 2.576109 | 1703.397 |
| 2.775    | 1706.642 | 622.925 | 269.626 | 594.823 | 367.238 | 151.6085 | 3.044361 | 1695.477 |
| 12.69676 | 1795.836 | 596.635 | 330.645 | 435.48  | 447.855 | 87.46478 | 2.164512 | 1745.672 |
| 0.977159 | 1594.237 | 664.744 | 241.42  | 613.571 | 280.445 | 344.4803 | 2.282428 | 1975.805 |
| 3.019214 | 1815.915 | 658.626 | 332.458 | 596.949 | 373.76  | 62.67819 | 6.543175 | 1760.891 |
| 2.515495 | 1766.287 | 753.767 | 272.141 | 674.837 | 333.336 | 147.7344 | 2.213931 | 1994.002 |
| 3.254396 | 1940.243 | 834.343 | 252.329 | 723.289 | 400.305 | 297.4856 | 4.78008  | 2179.6   |
| 1.527967 | 1593.369 | 653.504 | 239.989 | 652.947 | 263.645 | 222.4361 | 2.733181 | 1472.043 |
| -0.8633  | 1752.065 | 718.955 | 260.487 | 570.262 | 362.782 | 302.8407 | 5.463532 | 1223.193 |
| 3.078527 | 1709.982 | 751.458 | 244.056 | 643.587 | 367.179 | 191.9448 | 3.036096 | 2134.077 |
| 1.527967 | 1593.369 | 653.504 | 239.989 | 652.947 | 263.645 | 222.4361 | 2.733181 | 1472.043 |
| 3.402511 | 1801.875 | 765.158 | 242.219 | 652.101 | 377.846 | 184.527  | 4.803395 | 1531.5   |
| 3.673863 | 1689.434 | 533.232 | 297.784 | 533.232 | 348.849 | 353.818  | 9.800788 | 2414.645 |
| -0.41771 | 1550.417 | 578.046 | 232.753 | 534.165 | 284.639 | 200.8394 | 0.870624 | 920.6934 |
| 3.254396 | 1940.243 | 834.343 | 252.329 | 723.289 | 400.305 | 297.4856 | 4.78008  | 2179.6   |
| 3.078527 | 1709.982 | 751.458 | 244.056 | 643.587 | 367.179 | 191.9448 | 3.036096 | 2134.077 |
| 10.11392 | 1595.562 | 514.394 | 277.919 | 514.394 | 340.584 | 327.824  | 10.42236 | 2086.291 |
| -1.72355 | 1358.596 | 581.878 | 172.581 | 523.931 | 235.866 | 693.117  | 3.449864 | 1538.647 |
| 2.98006  | 1712.541 | 647.985 | 294.939 | 584.4   | 364.177 | 122.264  | 6.164512 | 2312.941 |
| 1.527967 | 1593.369 | 653.504 | 239.989 | 652.947 | 263.645 | 222.4361 | 2.733181 | 1472.043 |
| 1.165121 | 1758.55  | 773.716 | 260.25  | 620.897 | 324.493 | 240.9818 | 2.35066  | 1953.851 |
| -2.0658  | 1737.211 | 552.653 | 308.083 | 492.523 | 308.083 | 559.32   | 6.887537 | 1658.008 |
| 2.861005 | 1876.506 | 770.783 | 302.223 | 712.595 | 376.309 | 131.5466 | 7.098525 | 1302.395 |
| 2.67878  | 1857.64  | 776.54  | 295.668 | 720.464 | 376.505 | 139.6398 | 0.460311 | 1805.588 |

Table S2 - Anonymized database

|          |          |         |         |         |         |          |          |          |
|----------|----------|---------|---------|---------|---------|----------|----------|----------|
| 11.32852 | 1866.229 | 735.493 | 293.782 | 613.172 | 407.25  | 250.0854 | 6.824211 | 2129.41  |
| 10.22724 | 1567.866 | 501.406 | 274.268 | 463.839 | 342.907 | 344.3909 | 7.572275 | 1738.915 |
| 7.493527 | 1732.353 | 675.805 | 294.739 | 618.215 | 369.921 | 105.9056 | 4.341443 | 1633.646 |
| -0.8633  | 1752.065 | 718.955 | 260.487 | 570.262 | 362.782 | 302.8407 | 5.463532 | 1223.193 |
| 3.361176 | 1757.985 | 700.142 | 264.277 | 591.576 | 417.158 | 130.5054 | 1.396612 | 1963.494 |
| 3.186462 | 1749.97  | 683.881 | 258.535 | 628.119 | 343.95  | 174.5617 | 0.468577 | 1840.082 |
| 3.312335 | 1748.048 | 605.137 | 330.629 | 521.998 | 401.257 | 121.9577 | 2.032796 | 1891.805 |
| 0.693659 | 1641.955 | 674.39  | 234.111 | 617.163 | 294.82  | 211.2159 | 8.984717 | 1305.867 |
| 3.202247 | 1743.849 | 671.584 | 293.122 | 576.912 | 397.75  | 146.1161 | 0.880539 | 1819.605 |
| 3.38656  | 1671.116 | 534.958 | 296.157 | 388.283 | 341.02  | 305.1122 | 1.098116 | 1929.252 |
| 11.32852 | 1866.229 | 735.493 | 293.782 | 613.172 | 407.25  | 250.0854 | 6.824211 | 2129.41  |
| 3.284632 | 1766.656 | 726.812 | 251.065 | 605.233 | 355.336 | 142.9463 | 2.576109 | 1703.397 |
| 4.061687 | 1767.573 | 553.444 | 337.394 | 553.444 | 410.382 | 52.20359 | 5.166937 | 1447.064 |
| 3.078527 | 1709.982 | 751.458 | 244.056 | 643.587 | 367.179 | 191.9448 | 3.036096 | 2134.077 |
| 0.977159 | 1594.237 | 664.744 | 241.42  | 613.571 | 280.445 | 344.4803 | 2.282428 | 1975.805 |
| 12.39011 | 1694.763 | 534.732 | 335.899 | 398.526 | 429.408 | 83.90097 | 2.566    | 2002.437 |
| 1.369231 | 1606.278 | 649.244 | 245.354 | 642.337 | 269.913 | 301.849  | 15.21554 | 2029.688 |
| 2.923692 | 1750.604 | 725.927 | 281.575 | 644.04  | 339.092 | 108.9301 | 0.270718 | 1853.959 |
| 2.658973 | 1857.823 | 804.853 | 282.122 | 769.688 | 368.375 | 163.24   | 0.627206 | 1907.193 |
| 1.165121 | 1758.55  | 773.716 | 260.25  | 620.897 | 324.493 | 240.9818 | 2.35066  | 1953.851 |
| 4.061687 | 1767.573 | 553.444 | 337.394 | 553.444 | 410.382 | 52.20359 | 5.166937 | 1447.064 |
| -3.14471 | 1338.751 | 410.37  | 265.597 | 404.62  | 271.411 | 482.474  | 3.426512 | 1754.312 |
| -2.13416 | 1758.907 | 557.63  | 287.94  | 533.806 | 287.94  | 578.7245 | 15.7686  | 1843.488 |
| 11.77305 | 1798.059 | 729.666 | 298.193 | 624.238 | 390.883 | 158.5528 | 2.500618 | 2028.029 |
| 0.977159 | 1594.237 | 664.744 | 241.42  | 613.571 | 280.445 | 344.4803 | 2.282428 | 1975.805 |
| 10.3962  | 1656.738 | 540.026 | 292.239 | 499.881 | 349.794 | 288.6407 | 7.765498 | 2007.697 |
| 0.893077 | 1718.605 | 712.982 | 287.465 | 568.043 | 350.714 | 345.0285 | 2.841131 | 1883.004 |
| -2.42617 | 1767.578 | 569.778 | 308.643 | 515.791 | 309.057 | 662.647  | 3.772194 | 2229.433 |
| 3.09322  | 1645.044 | 511.449 | 294.596 | 395.47  | 329.005 | 311.3914 | 3.386594 | 1645.39  |
| 3.673863 | 1689.434 | 533.232 | 297.784 | 533.232 | 348.849 | 353.818  | 9.800788 | 2414.645 |
| 1.599203 | 1874.653 | 773.233 | 277.26  | 704.633 | 364.567 | 427.536  | 23.76717 | 3358.25  |
| 11.32852 | 1866.229 | 735.493 | 293.782 | 613.172 | 407.25  | 250.0854 | 6.824211 | 2129.41  |
| 2.739203 | 1760.081 | 718.746 | 280.373 | 654.203 | 347.181 | 162.8161 | 1.964231 | 1741.297 |
| 12.79818 | 1775.993 | 583.92  | 319.59  | 490.019 | 439.791 | 91.46474 | 1.612379 | 1995.601 |
| 1.599203 | 1874.653 | 773.233 | 277.26  | 704.633 | 364.567 | 427.536  | 23.76717 | 3358.25  |
| -2.13416 | 1758.907 | 557.63  | 287.94  | 533.806 | 287.94  | 578.7245 | 15.7686  | 1843.488 |
| 2.67878  | 1857.64  | 776.54  | 295.668 | 720.464 | 376.505 | 139.6398 | 0.460311 | 1805.588 |
| 3.165027 | 1786.812 | 722.962 | 244.536 | 616.051 | 363.824 | 176.3364 | 1.888108 | 1919.367 |
| 12.19463 | 1690.914 | 540.209 | 315.174 | 420.553 | 427.2   | 117.4134 | 4.922527 | 1843.187 |
| 11.32852 | 1866.229 | 735.493 | 293.782 | 613.172 | 407.25  | 250.0854 | 6.824211 | 2129.41  |
| 3.078527 | 1709.982 | 751.458 | 244.056 | 643.587 | 367.179 | 191.9448 | 3.036096 | 2134.077 |
| 2.92322  | 1869.494 | 701.625 | 331.039 | 646.369 | 378.381 | 118.1115 | 1.501855 | 1862.66  |
| 0.977159 | 1594.237 | 664.744 | 241.42  | 613.571 | 280.445 | 344.4803 | 2.282428 | 1975.805 |
| 0.914473 | 1762.075 | 769.288 | 249.294 | 630.181 | 304.338 | 195.607  | 12.72143 | 1135.702 |
| -1.72355 | 1358.596 | 581.878 | 172.581 | 523.931 | 235.866 | 693.117  | 3.449864 | 1538.647 |
| 3.082264 | 1841.716 | 765.463 | 299.75  | 657.881 | 389.15  | 187.7079 | 2.024981 | 2018.113 |
| -0.54135 | 1745.066 | 603.212 | 306.222 | 572.405 | 308.373 | 294.5679 | 3.569889 | 2092.734 |
| 0.655505 | 1798.683 | 851.344 | 229.906 | 796.802 | 302.237 | 230.9364 | 4.226843 | 2008.737 |
| -0.03574 | 1728.667 | 592.558 | 281.159 | 459.295 | 297.488 | 321.0894 | 7.302571 | 1338.034 |
| 3.270945 | 1667.127 | 534.067 | 293.901 | 424.25  | 335.156 | 334.5434 | 9.641643 | 1425.432 |

Table S2 - Anonymized database

|          |          |         |         |         |         |          |          |          |
|----------|----------|---------|---------|---------|---------|----------|----------|----------|
| 0.977159 | 1594.237 | 664.744 | 241.42  | 613.571 | 280.445 | 344.4803 | 2.282428 | 1975.805 |
| 12.67234 | 1722.314 | 565.458 | 330.413 | 405.641 | 440.329 | 54.76521 | 5.173323 | 1836.214 |
| 3.254396 | 1940.243 | 834.343 | 252.329 | 723.289 | 400.305 | 297.4856 | 4.78008  | 2179.6   |
| 2.739203 | 1760.081 | 718.746 | 280.373 | 654.203 | 347.181 | 162.8161 | 1.964231 | 1741.297 |
| -2.73457 | 1690.79  | 575.959 | 263.325 | 529.174 | 263.325 | 602.6755 | 10.18564 | 2336.094 |
| 3.284632 | 1766.656 | 726.812 | 251.065 | 605.233 | 355.336 | 142.9463 | 2.576109 | 1703.397 |
| 3.078527 | 1709.982 | 751.458 | 244.056 | 643.587 | 367.179 | 191.9448 | 3.036096 | 2134.077 |
| 0.446736 | 2007.881 | 732.491 | 340.365 | 659.08  | 457.163 | 311.8601 | 0.561861 | 1807.235 |
| 3.078527 | 1709.982 | 751.458 | 244.056 | 643.587 | 367.179 | 191.9448 | 3.036096 | 2134.077 |
| 2.994984 | 1636.069 | 511.474 | 292.264 | 370.066 | 332.285 | 363.2772 | 6.386463 | 2184.072 |
| 10.61508 | 1932.18  | 718.592 | 325.626 | 676.148 | 436.192 | 188.1355 | 5.151401 | 2020.188 |
| 2.309527 | 1759.552 | 665.196 | 297.839 | 608.559 | 382.53  | 231.4455 | 5.869617 | 2064.344 |
| 1.36717  | 1631.658 | 686.213 | 240.917 | 561.508 | 319.077 | 161.0517 | 3.782925 | 1557.11  |
| -2.32548 | 1444.681 | 448.344 | 270.455 | 395.367 | 270.455 | 330.781  | 0.599844 | 1782.226 |
| 1.599203 | 1874.653 | 773.233 | 277.26  | 704.633 | 364.567 | 427.536  | 23.76717 | 3358.25  |
| 0.057346 | 1641.624 | 688.454 | 233.49  | 652.575 | 304.641 | 423.5338 | 15.46822 | 1331.014 |
| 2.515495 | 1766.287 | 753.767 | 272.141 | 674.837 | 333.336 | 147.7344 | 2.213931 | 1994.002 |
| -2.15702 | 1375.056 | 425.211 | 233.701 | 379.362 | 233.701 | 347.2733 | 4.467479 | 2075.471 |
| -1.80219 | 1829.322 | 673.068 | 270.259 | 598.688 | 295.698 | 425.881  | 16.28463 | 2612.849 |
| 3.284632 | 1766.656 | 726.812 | 251.065 | 605.233 | 355.336 | 142.9463 | 2.576109 | 1703.397 |
| 3.269582 | 1761.512 | 673.087 | 252.466 | 580.927 | 351.081 | 186.2722 | 14.29552 | 2568.046 |
| 3.078527 | 1709.982 | 751.458 | 244.056 | 643.587 | 367.179 | 191.9448 | 3.036096 | 2134.077 |
| 2.515495 | 1766.287 | 753.767 | 272.141 | 674.837 | 333.336 | 147.7344 | 2.213931 | 1994.002 |
| 3.224808 | 1725.185 | 734.304 | 267.716 | 605.522 | 351.814 | 118.4804 | 4.569775 | 1687.026 |
| 12.07976 | 1683.682 | 592.625 | 305.189 | 507.767 | 402.879 | 92.29993 | 9.324022 | 1126.678 |
| -0.9291  | 1498.215 | 648.835 | 172.608 | 624.047 | 236.998 | 318.5292 | 13.84482 | 1524.968 |
| 2.844868 | 1735.468 | 596.5   | 332.033 | 537.819 | 364.987 | 99.84711 | 3.078826 | 1649.392 |
| 1.068066 | 1644.372 | 676.736 | 255.604 | 540.952 | 328.193 | 187.6075 | 5.691956 | 1343.706 |
| 1.527967 | 1593.369 | 653.504 | 239.989 | 652.947 | 263.645 | 222.4361 | 2.733181 | 1472.043 |
| 3.366198 | 1708.992 | 522.547 | 336.275 | 466.573 | 407.951 | 98.54894 | 0.803851 | 1818.95  |
| -0.41771 | 1550.417 | 578.046 | 232.753 | 534.165 | 284.639 | 200.8394 | 0.870624 | 920.6934 |
| 11.56054 | 1731.735 | 653     | 289.524 | 551.408 | 392.258 | 133.692  | 0.928783 | 1841.605 |
| 2.658973 | 1857.823 | 804.853 | 282.122 | 769.688 | 368.375 | 163.24   | 0.627206 | 1907.193 |
| -2.66538 | 1472.877 | 466.147 | 269.666 | 425.297 | 269.666 | 385.9416 | 16.94996 | 446.4642 |
| 7.99656  | 1601.338 | 515.562 | 279.154 | 513.384 | 337.386 | 388.4849 | 0.546904 | 1860.972 |
| -1.72355 | 1358.596 | 581.878 | 172.581 | 523.931 | 235.866 | 693.117  | 3.449864 | 1538.647 |
| 2.739203 | 1760.081 | 718.746 | 280.373 | 654.203 | 347.181 | 162.8161 | 1.964231 | 1741.297 |
| -2.42617 | 1767.578 | 569.778 | 308.643 | 515.791 | 309.057 | 662.647  | 3.772194 | 2229.433 |
| -3.14471 | 1338.751 | 410.37  | 265.597 | 404.62  | 271.411 | 482.474  | 3.426512 | 1754.312 |
| -1.80219 | 1829.322 | 673.068 | 270.259 | 598.688 | 295.698 | 425.881  | 16.28463 | 2612.849 |
| -2.80929 | 1344.204 | 397.487 | 267.195 | 338.895 | 267.195 | 409.062  | 9.06532  | 2102.892 |
| 3.673863 | 1689.434 | 533.232 | 297.784 | 533.232 | 348.849 | 353.818  | 9.800788 | 2414.645 |
| 3.09322  | 1645.044 | 511.449 | 294.596 | 395.47  | 329.005 | 311.3914 | 3.386594 | 1645.39  |
| 0.655505 | 1798.683 | 851.344 | 229.906 | 796.802 | 302.237 | 230.9364 | 4.226843 | 2008.737 |
| 2.994984 | 1636.069 | 511.474 | 292.264 | 370.066 | 332.285 | 363.2772 | 6.386463 | 2184.072 |
| 0.977159 | 1594.237 | 664.744 | 241.42  | 613.571 | 280.445 | 344.4803 | 2.282428 | 1975.805 |
| 11.38651 | 1863.632 | 727.8   | 297.391 | 628.303 | 411.921 | 119.6027 | 1.839919 | 1925.151 |
| 0.977159 | 1594.237 | 664.744 | 241.42  | 613.571 | 280.445 | 344.4803 | 2.282428 | 1975.805 |
| 2.844868 | 1735.468 | 596.5   | 332.033 | 537.819 | 364.987 | 99.84711 | 3.078826 | 1649.392 |
| -1.72355 | 1358.596 | 581.878 | 172.581 | 523.931 | 235.866 | 693.117  | 3.449864 | 1538.647 |



Table S2 - Anonymized database

|          |          |         |         |         |         |          |          |          |
|----------|----------|---------|---------|---------|---------|----------|----------|----------|
| 3.284632 | 1766.656 | 726.812 | 251.065 | 605.233 | 355.336 | 142.9463 | 2.576109 | 1703.397 |
| 1.165121 | 1758.55  | 773.716 | 260.25  | 620.897 | 324.493 | 240.9818 | 2.35066  | 1953.851 |
| 7.99656  | 1601.338 | 515.562 | 279.154 | 513.384 | 337.386 | 388.4849 | 0.546904 | 1860.972 |
| 10.3962  | 1656.738 | 540.026 | 292.239 | 499.881 | 349.794 | 288.6407 | 7.765498 | 2007.697 |
| 0.089544 | 1624.298 | 659.248 | 248.595 | 629.329 | 291.427 | 363.0986 | 3.370361 | 2047.03  |
| 0.977159 | 1594.237 | 664.744 | 241.42  | 613.571 | 280.445 | 344.4803 | 2.282428 | 1975.805 |
| 3.019214 | 1815.915 | 658.626 | 332.458 | 596.949 | 373.76  | 62.67819 | 6.543175 | 1760.891 |
| 2.515495 | 1766.287 | 753.767 | 272.141 | 674.837 | 333.336 | 147.7344 | 2.213931 | 1994.002 |
| 3.170423 | 1667.742 | 687.202 | 246.772 | 575.913 | 321.377 | 125.6447 | 1.431671 | 1880.36  |
| 3.261434 | 1879.834 | 690.801 | 311.902 | 627.259 | 388.914 | 65.92776 | 4.091606 | 1768.229 |
| -3.14471 | 1338.751 | 410.37  | 265.597 | 404.62  | 271.411 | 482.474  | 3.426512 | 1754.312 |
| -3.14471 | 1338.751 | 410.37  | 265.597 | 404.62  | 271.411 | 482.474  | 3.426512 | 1754.312 |
| 0.537049 | 1707.55  | 650.433 | 286.152 | 619.503 | 305.673 | 365.2663 | 8.606683 | 2248.623 |
| 0.977159 | 1594.237 | 664.744 | 241.42  | 613.571 | 280.445 | 344.4803 | 2.282428 | 1975.805 |
| 1.165121 | 1758.55  | 773.716 | 260.25  | 620.897 | 324.493 | 240.9818 | 2.35066  | 1953.851 |
| -2.46074 | 1373.009 | 422.337 | 249.857 | 365.846 | 249.857 | 396.1142 | 1.802708 | 1720.296 |
| 3.673863 | 1689.434 | 533.232 | 297.784 | 533.232 | 348.849 | 353.818  | 9.800788 | 2414.645 |
| 9.255143 | 1650.811 | 552.766 | 309.093 | 552.766 | 317.585 | 384.1146 | 8.195766 | 2390.127 |
| -3.14471 | 1338.751 | 410.37  | 265.597 | 404.62  | 271.411 | 482.474  | 3.426512 | 1754.312 |
| -1.72355 | 1358.596 | 581.878 | 172.581 | 523.931 | 235.866 | 693.117  | 3.449864 | 1538.647 |
| 10.09323 | 1722.892 | 566.342 | 274.754 | 566.342 | 353.188 | 272.5588 | 7.12005  | 2301.675 |
| 1.068066 | 1644.372 | 676.736 | 255.604 | 540.952 | 328.193 | 187.6075 | 5.691956 | 1343.706 |
| 4.306681 | 1669.886 | 546.443 | 290.398 | 461.013 | 447.037 | 28.46955 | 0.679182 | 1846.094 |
| 7.493527 | 1732.353 | 675.805 | 294.739 | 618.215 | 369.921 | 105.9056 | 4.341443 | 1633.646 |
| -1.55404 | 1655.204 | 707.488 | 235.803 | 692.561 | 285.481 | 489.7062 | 3.59755  | 1702.217 |
| 10.22724 | 1567.866 | 501.406 | 274.268 | 463.839 | 342.907 | 344.3909 | 7.572275 | 1738.915 |
| -0.03574 | 1728.667 | 592.558 | 281.159 | 459.295 | 297.488 | 321.0894 | 7.302571 | 1338.034 |
| 2.045709 | 1716.124 | 701.845 | 242.792 | 614.784 | 306.751 | 288.6531 | 13.5198  | 1038.656 |
| 11.56054 | 1731.735 | 653     | 289.524 | 551.408 | 392.258 | 133.692  | 0.928783 | 1841.605 |
| 9.255143 | 1650.811 | 552.766 | 309.093 | 552.766 | 317.585 | 384.1146 | 8.195766 | 2390.127 |
| 3.191758 | 1749.745 | 600.434 | 315.678 | 581.92  | 364.259 | 71.10771 | 0.571329 | 1809.155 |
| 10.2139  | 1949.674 | 754.498 | 311.599 | 738.447 | 399.291 | 126.3232 | 4.08183  | 1849.596 |
| 3.270945 | 1667.127 | 534.067 | 293.901 | 424.25  | 335.156 | 334.5434 | 9.641643 | 1425.432 |
| 12.79818 | 1775.993 | 583.92  | 319.59  | 490.019 | 439.791 | 91.46474 | 1.612379 | 1995.601 |
| 0.089544 | 1624.298 | 659.248 | 248.595 | 629.329 | 291.427 | 367.653  | 6.092455 | 2268.084 |
| 2.67878  | 1857.64  | 776.54  | 295.668 | 720.464 | 376.505 | 139.6398 | 0.460311 | 1805.588 |
| -0.9291  | 1498.215 | 648.835 | 172.608 | 624.047 | 236.998 | 318.5292 | 13.84482 | 1524.968 |
| -2.66538 | 1472.877 | 466.147 | 269.666 | 425.297 | 269.666 | 385.9416 | 16.94996 | 446.4642 |
| 9.674176 | 1677.047 | 747.362 | 233.006 | 715.846 | 287.275 | 500.629  | 1.819382 | 1815.314 |
| -3.14471 | 1338.751 | 410.37  | 265.597 | 404.62  | 271.411 | 482.474  | 3.426512 | 1754.312 |
| 11.32852 | 1866.229 | 735.493 | 293.782 | 613.172 | 407.25  | 250.0854 | 6.824211 | 2129.41  |
| 3.284632 | 1766.656 | 726.812 | 251.065 | 605.233 | 355.336 | 142.9463 | 2.576109 | 1703.397 |
| -0.8633  | 1752.065 | 718.955 | 260.487 | 570.262 | 362.782 | 302.8407 | 5.463532 | 1223.193 |
| 10.3962  | 1656.738 | 540.026 | 292.239 | 499.881 | 349.794 | 288.6407 | 7.765498 | 2007.697 |
| -0.54135 | 1745.066 | 603.212 | 306.222 | 572.405 | 308.373 | 294.5679 | 3.569889 | 2092.734 |
| 3.539126 | 1680.951 | 554.388 | 288.569 | 403.414 | 299.121 | 317.2497 | 11.81392 | 959.2725 |
| 3.165027 | 1786.812 | 722.962 | 244.536 | 616.051 | 363.824 | 176.3364 | 1.888108 | 1919.367 |
| 3.494104 | 1713.474 | 552.081 | 335.551 | 431.305 | 415.616 | 110.0355 | 1.325417 | 1893.37  |
| 0.914473 | 1762.075 | 769.288 | 249.294 | 630.181 | 304.338 | 195.607  | 12.72143 | 1135.702 |
| 2.861005 | 1876.506 | 770.783 | 302.223 | 712.595 | 376.309 | 131.5466 | 7.098525 | 1302.395 |

Table S2 - Anonymized database

|          |          |         |         |         |         |          |          |          |
|----------|----------|---------|---------|---------|---------|----------|----------|----------|
| 3.654016 | 1808.103 | 609.406 | 326.03  | 600.122 | 405.004 | 69.53417 | 3.856232 | 1601.942 |
| 11.32852 | 1866.229 | 735.493 | 293.782 | 613.172 | 407.25  | 250.0854 | 6.824211 | 2129.41  |
| -2.73457 | 1690.79  | 575.959 | 263.325 | 529.174 | 263.325 | 602.6755 | 10.18564 | 2336.094 |
| 10.22724 | 1567.866 | 501.406 | 274.268 | 463.839 | 342.907 | 344.3909 | 7.572275 | 1738.915 |
| 2.844868 | 1735.468 | 596.5   | 332.033 | 537.819 | 364.987 | 99.84711 | 3.078826 | 1649.392 |
| 10.3962  | 1656.738 | 540.026 | 292.239 | 499.881 | 349.794 | 288.6407 | 7.765498 | 2007.697 |
| 11.32852 | 1866.229 | 735.493 | 293.782 | 613.172 | 407.25  | 250.0854 | 6.824211 | 2129.41  |
| 10.11392 | 1595.562 | 514.394 | 277.919 | 514.394 | 340.584 | 327.824  | 10.42236 | 2086.291 |
| -3.14471 | 1338.751 | 410.37  | 265.597 | 404.62  | 271.411 | 482.474  | 3.426512 | 1754.312 |
| -1.80219 | 1829.322 | 673.068 | 270.259 | 598.688 | 295.698 | 425.881  | 16.28463 | 2612.849 |
| 2.92322  | 1869.494 | 701.625 | 331.039 | 646.369 | 378.381 | 118.1115 | 1.501855 | 1862.66  |
| 2.515495 | 1766.287 | 753.767 | 272.141 | 674.837 | 333.336 | 147.7344 | 2.213931 | 1994.002 |
| -0.98347 | 1482.361 | 509.542 | 255.363 | 437.681 | 289.916 | 443.7068 | 24.45277 | 9.84658  |
| -0.9291  | 1498.215 | 648.835 | 172.608 | 624.047 | 236.998 | 318.5292 | 13.84482 | 1524.968 |
| 1.527967 | 1593.369 | 653.504 | 239.989 | 652.947 | 263.645 | 222.4361 | 2.733181 | 1472.043 |
| 2.67878  | 1857.64  | 776.54  | 295.668 | 720.464 | 376.505 | 139.6398 | 0.460311 | 1805.588 |
| 8.429346 | 1519.842 | 463.864 | 279.723 | 375.305 | 336.653 | 365.6075 | 12.60653 | 1907.473 |
| 12.79818 | 1775.993 | 583.92  | 319.59  | 490.019 | 439.791 | 91.46474 | 1.612379 | 1995.601 |
| 0.057346 | 1641.624 | 688.454 | 233.49  | 652.575 | 304.641 | 423.5338 | 15.46822 | 1331.014 |
| 9.674176 | 1677.047 | 747.362 | 233.006 | 715.846 | 287.275 | 500.629  | 1.819382 | 1815.314 |
| 1.165121 | 1758.55  | 773.716 | 260.25  | 620.897 | 324.493 | 240.9818 | 2.35066  | 1953.851 |
| 3.270945 | 1667.127 | 534.067 | 293.901 | 424.25  | 335.156 | 345.6854 | 12.32941 | 1844.389 |
| 2.67878  | 1857.64  | 776.54  | 295.668 | 720.464 | 376.505 | 139.6398 | 0.460311 | 1805.588 |
| -2.55621 | 1415.638 | 491.994 | 259.568 | 371.713 | 269.072 | 398.2895 | 1.172895 | 1606.425 |
| 1.108027 | 1624.28  | 625.868 | 268.403 | 625.868 | 274.827 | 369.4496 | 3.147714 | 1759.718 |
| 0.977159 | 1594.237 | 664.744 | 241.42  | 613.571 | 280.445 | 344.4803 | 2.282428 | 1975.805 |
| 11.32852 | 1866.229 | 735.493 | 293.782 | 613.172 | 407.25  | 250.0854 | 6.824211 | 2129.41  |
| 3.019214 | 1815.915 | 658.626 | 332.458 | 596.949 | 373.76  | 62.67819 | 6.543175 | 1760.891 |
| 3.261434 | 1879.834 | 690.801 | 311.902 | 627.259 | 388.914 | 65.92776 | 4.091606 | 1768.229 |
| 2.658973 | 1857.823 | 804.853 | 282.122 | 769.688 | 368.375 | 163.24   | 0.627206 | 1907.193 |
| -3.14471 | 1338.751 | 410.37  | 265.597 | 404.62  | 271.411 | 482.474  | 3.426512 | 1754.312 |
| 9.674176 | 1677.047 | 747.362 | 233.006 | 715.846 | 287.275 | 500.629  | 1.819382 | 1815.314 |
| 10.2139  | 1949.674 | 754.498 | 311.599 | 738.447 | 399.291 | 126.3232 | 4.08183  | 1849.596 |
| -1.55404 | 1655.204 | 707.488 | 235.803 | 692.561 | 285.481 | 489.7062 | 3.59755  | 1702.217 |
| -0.8633  | 1752.065 | 718.955 | 260.487 | 570.262 | 362.782 | 302.8407 | 5.463532 | 1223.193 |
| 3.361176 | 1757.985 | 700.142 | 264.277 | 591.576 | 417.158 | 130.5054 | 1.396612 | 1963.494 |
| 2.739203 | 1760.081 | 718.746 | 280.373 | 654.203 | 347.181 | 162.8161 | 1.964231 | 1741.297 |
| 3.402511 | 1801.875 | 765.158 | 242.219 | 652.101 | 377.846 | 184.527  | 4.803395 | 1531.5   |
| 11.32852 | 1866.229 | 735.493 | 293.782 | 613.172 | 407.25  | 250.0854 | 6.824211 | 2129.41  |
| 0.940978 | 1742.635 | 716.934 | 292.411 | 568.432 | 345.087 | 306.2375 | 0.923596 | 1703.135 |
| -0.8633  | 1752.065 | 718.955 | 260.487 | 570.262 | 362.782 | 302.8407 | 5.463532 | 1223.193 |
| -1.72355 | 1358.596 | 581.878 | 172.581 | 523.931 | 235.866 | 693.117  | 3.449864 | 1538.647 |
| -2.73457 | 1690.79  | 575.959 | 263.325 | 529.174 | 263.325 | 602.6755 | 10.18564 | 2336.094 |
| 12.79818 | 1775.993 | 583.92  | 319.59  | 490.019 | 439.791 | 91.46474 | 1.612379 | 1995.601 |
| -0.41771 | 1550.417 | 578.046 | 232.753 | 534.165 | 284.639 | 200.8394 | 0.870624 | 920.6934 |
| 3.366198 | 1708.992 | 522.547 | 336.275 | 466.573 | 407.951 | 98.54894 | 0.803851 | 1818.95  |
| 13.3792  | 1700.819 | 607.024 | 323.455 | 425.48  | 432.876 | 9.546456 | 0.136922 | 1877.606 |
| 12.79818 | 1775.993 | 583.92  | 319.59  | 490.019 | 439.791 | 91.46474 | 1.612379 | 1995.601 |
| 10.61508 | 1932.18  | 718.592 | 325.626 | 676.148 | 436.192 | 188.1355 | 5.151401 | 2020.188 |
| 3.224808 | 1725.185 | 734.304 | 267.716 | 605.522 | 351.814 | 118.4804 | 4.569775 | 1687.026 |

**Table S2 - Anonymized database**

|          |          |         |         |         |         |          |          |          |
|----------|----------|---------|---------|---------|---------|----------|----------|----------|
| 2.309527 | 1759.552 | 665.196 | 297.839 | 608.559 | 382.53  | 231.4455 | 5.869617 | 2064.344 |
| -2.66538 | 1472.877 | 466.147 | 269.666 | 425.297 | 269.666 | 385.9416 | 16.94996 | 446.4642 |
| 0.977159 | 1594.237 | 664.744 | 241.42  | 613.571 | 280.445 | 344.4803 | 2.282428 | 1975.805 |
| 9.712044 | 1732.498 | 585.667 | 311.317 | 585.667 | 315.814 | 368.1078 | 3.085942 | 1998.603 |
| 2.045709 | 1716.124 | 701.845 | 242.792 | 614.784 | 306.751 | 288.6531 | 13.5198  | 1038.656 |
| 12.39011 | 1694.763 | 534.732 | 335.899 | 398.526 | 429.408 | 83.90097 | 2.566    | 2002.437 |
| 9.255143 | 1650.811 | 552.766 | 309.093 | 552.766 | 317.585 | 384.1146 | 8.195766 | 2390.127 |
| -0.54135 | 1745.066 | 603.212 | 306.222 | 572.405 | 308.373 | 294.5679 | 3.569889 | 2092.734 |
| 3.03844  | 1928.127 | 868.941 | 263.871 | 768.761 | 345.561 | 115.4449 | 3.68327  | 1941.253 |
| -0.03574 | 1728.667 | 592.558 | 281.159 | 459.295 | 297.488 | 321.0894 | 7.302571 | 1338.034 |
| 11.64161 | 1855.697 | 761.546 | 284.142 | 679.693 | 395.206 | 119.5475 | 4.079675 | 1512.646 |
| 3.03844  | 1928.127 | 868.941 | 263.871 | 768.761 | 345.561 | 115.4449 | 3.68327  | 1941.253 |
| 0.057346 | 1641.624 | 688.454 | 233.49  | 652.575 | 304.641 | 423.5338 | 15.46822 | 1331.014 |
| 1.495863 | 1907.282 | 690.445 | 334.487 | 517.025 | 436.375 | 148.2937 | 1.099489 | 1699.062 |
| -2.13416 | 1758.907 | 557.63  | 287.94  | 533.806 | 287.94  | 578.7245 | 15.7686  | 1843.488 |
| 9.255143 | 1650.811 | 552.766 | 309.093 | 552.766 | 317.585 | 384.1146 | 8.195766 | 2390.127 |
| 10.22724 | 1567.866 | 501.406 | 274.268 | 463.839 | 342.907 | 344.3909 | 7.572275 | 1738.915 |
| 11.40095 | 1777.769 | 639.072 | 310.748 | 491.146 | 400.351 | 109.0332 | 0.997501 | 1804.575 |
| 10.3962  | 1656.738 | 540.026 | 292.239 | 499.881 | 349.794 | 288.6407 | 7.765498 | 2007.697 |
| 3.078527 | 1709.982 | 751.458 | 244.056 | 643.587 | 367.179 | 191.9448 | 3.036096 | 2134.077 |
| 3.03844  | 1928.127 | 868.941 | 263.871 | 768.761 | 345.561 | 115.4449 | 3.68327  | 1941.253 |
| -2.0658  | 1737.211 | 552.653 | 308.083 | 492.523 | 308.083 | 559.32   | 6.887537 | 1658.008 |
| 9.712044 | 1732.498 | 585.667 | 311.317 | 585.667 | 315.814 | 368.1078 | 3.085942 | 1998.603 |
| 7.493527 | 1732.353 | 675.805 | 294.739 | 618.215 | 369.921 | 105.9056 | 4.341443 | 1633.646 |
| -2.73457 | 1690.79  | 575.959 | 263.325 | 529.174 | 263.325 | 602.6755 | 10.18564 | 2336.094 |
| 7.99656  | 1601.338 | 515.562 | 279.154 | 513.384 | 337.386 | 388.4849 | 0.546904 | 1860.972 |
| 0.655505 | 1798.683 | 851.344 | 229.906 | 796.802 | 302.237 | 230.9364 | 4.226843 | 2008.737 |
| 12.79818 | 1775.993 | 583.92  | 319.59  | 490.019 | 439.791 | 91.46474 | 1.612379 | 1995.601 |
| 1.599203 | 1874.653 | 773.233 | 277.26  | 704.633 | 364.567 | 427.536  | 23.76717 | 3358.25  |
| 12.07976 | 1683.682 | 592.625 | 305.189 | 507.767 | 402.879 | 92.29993 | 9.324022 | 1126.678 |



Table S2 - Anonymized database

|           |           |          |          |          |          |          |                  |    |
|-----------|-----------|----------|----------|----------|----------|----------|------------------|----|
| -0.0004   | 0.000957  | 6.641533 | 0.442236 | 0.896899 | 0.005228 | 0.388217 | 2 to 5 year      | 20 |
| -0.0004   | 0.000957  | 6.641533 | 0.442236 | 0.896899 | 0.005228 | 0.388217 | 2 to 5 year      | 20 |
| -0.0004   | 0.000957  | 6.641533 | 0.442236 | 0.896899 | 0.005228 | 0.388217 | 2 to 5 year      | 20 |
| -0.0004   | 0.000957  | 6.641533 | 0.442236 | 0.896899 | 0.005228 | 0.388217 | 2 to 5 year      | 20 |
| -0.0004   | 0.000957  | 6.641533 | 0.442236 | 0.896899 | 0.005228 | 0.388217 | 2 to 5 year      | 20 |
| -0.0004   | 0.000957  | 6.641533 | 0.442236 | 0.896899 | 0.005228 | 0.388217 | 2 to 5 year      | 20 |
| -0.0004   | 0.000957  | 6.641533 | 0.442236 | 0.896899 | 0.005228 | 0.388217 | 2 to 5 year      | 20 |
| -0.00019  | 0.000372  | 7.982374 | 0.981559 | 0.191161 | 0.011815 | 0.379323 | 5 to 10 year     | 5  |
| -8.50E-05 | 0.000397  | 7.945985 | 0.140679 | 0.990055 | 0.033448 | 0.351633 | 5 to 10 year     | 7  |
| -8.50E-05 | 0.000397  | 7.945985 | 0.140679 | 0.990055 | 0.033448 | 0.351633 | 5 to 10 year     | 7  |
| -8.50E-05 | 0.000397  | 7.945985 | 0.140679 | 0.990055 | 0.033448 | 0.351633 | 5 to 10 year     | 7  |
| 0.00045   | 0.001567  | 6.19803  | 0.377834 | -0.92587 | 0.001788 | 0.397825 | Over 10 year     | 11 |
| 0.00045   | 0.001567  | 6.19803  | 0.377834 | -0.92587 | 0.001788 | 0.397825 | Over 10 year     | 11 |
| 0.00045   | 0.001567  | 6.19803  | 0.377834 | -0.92587 | 0.001788 | 0.397825 | Over 10 year     | 11 |
| 0.00045   | 0.001567  | 6.19803  | 0.377834 | -0.92587 | 0.001788 | 0.397825 | Over 10 year     | 11 |
| -4.84E-05 | 0.000152  | 7.918477 | -0.79487 | 0.606782 | 0.003819 | 0.382867 | 2 to 5 year      | 3  |
| -4.84E-05 | 0.000152  | 7.918477 | -0.79487 | 0.606782 | 0.003819 | 0.382867 | 2 to 5 year      | 3  |
| 0.000122  | 0.000508  | 6.87462  | -0.92133 | 0.38879  | 0.004402 | 0.396521 | 2 to 5 year      | 2  |
| 0.000743  | -0.00013  | 7.701545 | 0.940046 | -0.34105 | 0.091966 | 0.278508 | 2 to 5 year      | 2  |
| 0.000743  | -0.00013  | 7.701545 | 0.940046 | -0.34105 | 0.091966 | 0.278508 | 2 to 5 year      | 2  |
| 0.000181  | 0.001625  | 6.488424 | -0.71545 | -0.69866 | 0.008097 | 0.387316 | 1 to 2 year      | 9  |
| 0.000181  | 0.001625  | 6.488424 | -0.71545 | -0.69866 | 0.008097 | 0.387316 | 1 to 2 year      | 9  |
| 0.001139  | 0.000826  | 8.643519 | 0.917286 | 0.398228 | 3.06E-05 | 0.404539 | 2 to 5 year      | 10 |
| 0.001139  | 0.000826  | 8.643519 | 0.917286 | 0.398228 | 3.06E-05 | 0.404539 | 2 to 5 year      | 10 |
| 0.001139  | 0.000826  | 8.643519 | 0.917286 | 0.398228 | 3.06E-05 | 0.404539 | 2 to 5 year      | 10 |
| 0.001139  | 0.000826  | 8.643519 | 0.917286 | 0.398228 | 3.06E-05 | 0.404539 | 2 to 5 year      | 10 |
| 0.001139  | 0.000826  | 8.643519 | 0.917286 | 0.398228 | 3.06E-05 | 0.404539 | 2 to 5 year      | 10 |
| 0.000352  | 0.000302  | 6.929667 | -0.10627 | -0.99434 | 0.003855 | 0.402067 | 2 to 5 year      | 1  |
| -0.0002   | 0.001013  | 6.953256 | 0.983781 | 0.179375 | 0.002878 | 0.393284 | 5 to 10 year     | 15 |
| -0.0002   | 0.001013  | 6.953256 | 0.983781 | 0.179375 | 0.002878 | 0.393284 | 5 to 10 year     | 15 |
| -0.0002   | 0.001013  | 6.953256 | 0.983781 | 0.179375 | 0.002878 | 0.393284 | 5 to 10 year     | 15 |
| -0.0002   | 0.001013  | 6.953256 | 0.983781 | 0.179375 | 0.002878 | 0.393284 | 5 to 10 year     | 15 |
| -0.0002   | 0.001013  | 6.953256 | 0.983781 | 0.179375 | 0.002878 | 0.393284 | 5 to 10 year     | 15 |
| -0.0002   | 0.001013  | 6.953256 | 0.983781 | 0.179375 | 0.002878 | 0.393284 | 5 to 10 year     | 15 |
| -0.0002   | 0.001013  | 6.953256 | 0.983781 | 0.179375 | 0.002878 | 0.393284 | 5 to 10 year     | 15 |
| -0.00041  | -0.00111  | 11.81479 | -0.34196 | -0.93972 | 0.02326  | 0.372225 | 5 to 10 year     | 8  |
| -0.00041  | -0.00111  | 11.81479 | -0.34196 | -0.93972 | 0.02326  | 0.372225 | 5 to 10 year     | 8  |
| 5.87E-05  | -0.00011  | 9.120533 | -0.22296 | 0.974829 | 0.037514 | 0.339528 | 2 to 5 year      | 3  |
| 5.87E-05  | -0.00011  | 9.120533 | -0.22296 | 0.974829 | 0.037514 | 0.339528 | 2 to 5 year      | 3  |
| -3.60E-05 | -8.79E-05 | 8.242848 | -0.22782 | 0.973704 | 0.0006   | 0.432857 | 2 to 5 year      | 5  |
| -0.0004   | 0.000957  | 6.641533 | 0.442236 | 0.896899 | 0.005228 | 0.388217 | 5 to 10 year     | 26 |
| -0.0004   | 0.000957  | 6.641533 | 0.442236 | 0.896899 | 0.005228 | 0.388217 | 5 to 10 year     | 26 |
| -0.0004   | 0.000957  | 6.641533 | 0.442236 | 0.896899 | 0.005228 | 0.388217 | 5 to 10 year     | 26 |
| -0.0004   | 0.000957  | 6.641533 | 0.442236 | 0.896899 | 0.005228 | 0.388217 | 5 to 10 year     | 26 |
| -0.0004   | 0.000957  | 6.641533 | 0.442236 | 0.896899 | 0.005228 | 0.388217 | 5 to 10 year     | 26 |
| -0.0004   | 0.000957  | 6.641533 | 0.442236 | 0.896899 | 0.005228 | 0.388217 | 5 to 10 year     | 26 |
| 0.000452  | -0.00043  | 8.325767 | -0.38681 | -0.92216 | 0.000667 | 0.38089  | Less than 1 year | 2  |
| 0.002697  | 0.002325  | 5.800778 | 0.905334 | -0.4247  | 0.001936 | 0.399948 | Over 10 year     | 17 |
| 0.002697  | 0.002325  | 5.800778 | 0.905334 | -0.4247  | 0.001936 | 0.399948 | Over 10 year     | 17 |
| 0.002697  | 0.002325  | 5.800778 | 0.905334 | -0.4247  | 0.001936 | 0.399948 | Over 10 year     | 17 |

Table S2 - Anonymized database

|           |           |          |          |          |          |          |             |    |
|-----------|-----------|----------|----------|----------|----------|----------|-------------|----|
| 0.002697  | 0.002325  | 5.800778 | 0.905334 | -0.4247  | 0.001936 | 0.399948 | Over 10 ye  | 17 |
| 0.002697  | 0.002325  | 5.800778 | 0.905334 | -0.4247  | 0.001936 | 0.399948 | Over 10 ye  | 17 |
| 0.002697  | 0.002325  | 5.800778 | 0.905334 | -0.4247  | 0.001936 | 0.399948 | Over 10 ye  | 17 |
| 0.002697  | 0.002325  | 5.800778 | 0.905334 | -0.4247  | 0.001936 | 0.399948 | Over 10 ye  | 17 |
| 0.000891  | 0.00392   | 5.304569 | 0.842642 | 0.538474 | 4.06E-05 | 0.399017 | 2 to 5 year | 9  |
| 0.000891  | 0.00392   | 5.304569 | 0.842642 | 0.538474 | 4.06E-05 | 0.399017 | 2 to 5 year | 9  |
| 0.000891  | 0.00392   | 5.304569 | 0.842642 | 0.538474 | 4.06E-05 | 0.399017 | 2 to 5 year | 9  |
| -0.00031  | 0.000173  | 8.677309 | 0.540681 | -0.84123 | 0.024952 | 0.366882 | 1 to 2 year | 2  |
| -0.00031  | 0.000173  | 8.677309 | 0.540681 | -0.84123 | 0.024952 | 0.366882 | 1 to 2 year | 2  |
| -0.00068  | 2.72E-05  | 8.409824 | 0.47124  | 0.882005 | 0.039537 | 0.326279 | 2 to 5 year | 14 |
| -0.00068  | 2.72E-05  | 8.409824 | 0.47124  | 0.882005 | 0.039537 | 0.326279 | 2 to 5 year | 14 |
| -0.00068  | 2.72E-05  | 8.409824 | 0.47124  | 0.882005 | 0.039537 | 0.326279 | 2 to 5 year | 14 |
| -0.0004   | 0.000669  | 7.70624  | -0.99708 | 0.076361 | 0.019945 | 0.383244 | 2 to 5 year | 6  |
| -0.0004   | 0.000669  | 7.70624  | -0.99708 | 0.076361 | 0.019945 | 0.383244 | 2 to 5 year | 6  |
| -7.18E-05 | -1.56E-05 | 7.911486 | -0.3367  | -0.94161 | 0.000646 | 0.422779 | 5 to 10 ya  | 9  |
| -7.18E-05 | -1.56E-05 | 7.911486 | -0.3367  | -0.94161 | 0.000646 | 0.422779 | 5 to 10 ya  | 9  |
| -7.18E-05 | -1.56E-05 | 7.911486 | -0.3367  | -0.94161 | 0.000646 | 0.422779 | 5 to 10 ya  | 9  |
| -0.00064  | -0.00037  | 8.810884 | 0.159075 | -0.98727 | 0.017465 | 0.406714 | 5 to 10 ya  | 8  |
| -0.00064  | -0.00037  | 8.810884 | 0.159075 | -0.98727 | 0.017465 | 0.406714 | 5 to 10 ya  | 8  |
| 0.000443  | 0.00158   | 6.237093 | -0.99049 | 0.137557 | 0.001588 | 0.360391 | Over 10 ye  | 31 |
| 0.000443  | 0.00158   | 6.237093 | -0.99049 | 0.137557 | 0.001588 | 0.360391 | Over 10 ye  | 31 |
| 0.000443  | 0.00158   | 6.237093 | -0.99049 | 0.137557 | 0.001588 | 0.360391 | Over 10 ye  | 31 |
| 0.000443  | 0.00158   | 6.237093 | -0.99049 | 0.137557 | 0.001588 | 0.360391 | Over 10 ye  | 31 |
| 0.000443  | 0.00158   | 6.237093 | -0.99049 | 0.137557 | 0.001588 | 0.360391 | Over 10 ye  | 31 |
| 0.000443  | 0.00158   | 6.237093 | -0.99049 | 0.137557 | 0.001588 | 0.360391 | Over 10 ye  | 31 |
| 0.000722  | -0.00228  | 10.3242  | -0.90898 | -0.41683 | 0.002737 | 0.389425 | Less than 1 | 3  |
| 0.001296  | -0.00068  | 8.44785  | 0.663142 | 0.748494 | 0.009909 | 0.387572 | 2 to 5 year | 8  |
| -0.00052  | -0.00071  | 8.980148 | 0.447706 | 0.894181 | 0.08958  | 0.278293 | Over 10 ye  | 28 |
| -0.00052  | -0.00071  | 8.980148 | 0.447706 | 0.894181 | 0.08958  | 0.278293 | Over 10 ye  | 28 |
| -0.00052  | -0.00071  | 8.980148 | 0.447706 | 0.894181 | 0.08958  | 0.278293 | Over 10 ye  | 28 |
| -0.00052  | -0.00071  | 8.980148 | 0.447706 | 0.894181 | 0.08958  | 0.278293 | Over 10 ye  | 28 |
| -0.00052  | -0.00071  | 8.980148 | 0.447706 | 0.894181 | 0.08958  | 0.278293 | Over 10 ye  | 28 |
| 0.000333  | 0.000143  | 7.315743 | 0.993855 | -0.11069 | 0.055491 | 0.279209 | 2 to 5 year | 3  |
| 0.000333  | 0.000143  | 7.315743 | 0.993855 | -0.11069 | 0.055491 | 0.279209 | 2 to 5 year | 3  |
| -0.00547  | -0.00471  | 9.736187 | -0.29985 | -0.95399 | 0.005529 | 0.407736 | 5 to 10 ya  | 5  |
| -0.00547  | -0.00471  | 9.736187 | -0.29985 | -0.95399 | 0.005529 | 0.407736 | 5 to 10 ya  | 5  |
| -0.00547  | -0.00471  | 9.736187 | -0.29985 | -0.95399 | 0.005529 | 0.407736 | 5 to 10 ya  | 5  |
| 0.000556  | 0.000357  | 6.866586 | -0.81302 | 0.582238 | 0.022762 | 0.38422  | 2 to 5 year | 1  |
| -0.00158  | -0.00072  | 6.94064  | -0.32886 | 0.94438  | 0.024372 | 0.374732 | Less than 1 | 2  |
| -0.00089  | -0.00035  | 7.0788   | -0.71109 | -0.7031  | 0.003488 | 0.403009 | 2 to 5 year | 5  |
| -0.00032  | 0.00039   | 7.819598 | -0.16045 | 0.987043 | 0.013231 | 0.403303 | 2 to 5 year | 2  |
| -0.00111  | -0.00027  | 10.13836 | 0.715309 | -0.69881 | 0.036897 | 0.350057 | Over 10 ye  | 10 |
| -0.00111  | -0.00027  | 10.13836 | 0.715309 | -0.69881 | 0.036897 | 0.350057 | Over 10 ye  | 10 |
| -0.00111  | -0.00027  | 10.13836 | 0.715309 | -0.69881 | 0.036897 | 0.350057 | Over 10 ye  | 10 |
| -0.00111  | -0.00027  | 10.13836 | 0.715309 | -0.69881 | 0.036897 | 0.350057 | Over 10 ye  | 10 |
| -0.00111  | -0.00027  | 10.13836 | 0.715309 | -0.69881 | 0.036897 | 0.350057 | Over 10 ye  | 10 |
| 0.001105  | 0.000415  | 5.860742 | -0.63306 | -0.7741  | 0.000107 | 0.404435 | 5 to 10 ya  | 5  |
| -0.00093  | 0.000257  | 8.140813 | 0.99914  | -0.04147 | 0.048512 | 0.34648  | 2 to 5 year | 3  |
| -0.00093  | 0.000257  | 8.140813 | 0.99914  | -0.04147 | 0.048512 | 0.34648  | 2 to 5 year | 3  |

Table S2 - Anonymized database

|           |          |          |          |          |          |          |                  |    |
|-----------|----------|----------|----------|----------|----------|----------|------------------|----|
| -0.00154  | -0.00157 | 9.944622 | -0.94558 | -0.32538 | 0.008966 | 0.390204 | 1 to 2 year      | 2  |
| 0.000452  | 0.000842 | 6.690324 | -0.85015 | -0.52654 | 0.032563 | 0.348585 | 1 to 2 year      | 3  |
| 0.001133  | 0.000899 | 6.576385 | 0.988113 | 0.153732 | 0.002441 | 0.427285 | 1 to 2 year      | 2  |
| 0.001133  | 0.000899 | 6.576385 | 0.988113 | 0.153732 | 0.002441 | 0.427285 | 1 to 2 year      | 2  |
| 0.001576  | 0.000457 | 6.224496 | 0.630085 | 0.776526 | 0.044078 | 0.371762 | 1 to 2 year      | 2  |
| 0.001339  | -0.00023 | 7.543291 | 0.125484 | 0.992096 | 0.005514 | 0.398555 | 5 to 10 year     | 15 |
| 0.001339  | -0.00023 | 7.543291 | 0.125484 | 0.992096 | 0.005514 | 0.398555 | 5 to 10 year     | 15 |
| 0.001339  | -0.00023 | 7.543291 | 0.125484 | 0.992096 | 0.005514 | 0.398555 | 5 to 10 year     | 15 |
| 0.00033   | 0.000413 | 7.68102  | 0.622847 | 0.782343 | 0.01425  | 0.411578 | Over 10 year     | 8  |
| 0.00033   | 0.000413 | 7.68102  | 0.622847 | 0.782343 | 0.01425  | 0.411578 | Over 10 year     | 8  |
| 0.000131  | -0.00029 | 9.292435 | -0.10971 | 0.993964 | 0.037466 | 0.339227 | Over 10 year     | 3  |
| 0.000131  | -0.00029 | 9.292435 | -0.10971 | 0.993964 | 0.037466 | 0.339227 | Over 10 year     | 3  |
| 0.000413  | -0.00087 | 6.962271 | 0.945246 | 0.326358 | 0.001523 | 0.379229 | 1 to 2 year      | 1  |
| -0.00026  | 0.000462 | 8.163028 | 0.284725 | -0.95861 | 0.024897 | 0.373615 | 1 to 2 year      | 2  |
| 0.000135  | -0.00132 | 8.828544 | 0.684457 | -0.72905 | 0.043763 | 0.373741 | 2 to 5 year      | 19 |
| 0.000135  | -0.00132 | 8.828544 | 0.684457 | -0.72905 | 0.043763 | 0.373741 | 2 to 5 year      | 19 |
| 0.000135  | -0.00132 | 8.828544 | 0.684457 | -0.72905 | 0.043763 | 0.373741 | 2 to 5 year      | 19 |
| 0.000135  | -0.00132 | 8.828544 | 0.684457 | -0.72905 | 0.043763 | 0.373741 | 2 to 5 year      | 19 |
| 0.000135  | -0.00132 | 8.828544 | 0.684457 | -0.72905 | 0.043763 | 0.373741 | 2 to 5 year      | 19 |
| 0.000135  | -0.00132 | 8.828544 | 0.684457 | -0.72905 | 0.043763 | 0.373741 | 2 to 5 year      | 19 |
| 0.000135  | -0.00132 | 8.828544 | 0.684457 | -0.72905 | 0.043763 | 0.373741 | 2 to 5 year      | 19 |
| 0.000135  | -0.00132 | 8.828544 | 0.684457 | -0.72905 | 0.043763 | 0.373741 | 2 to 5 year      | 19 |
| 0.000135  | -0.00132 | 8.828544 | 0.684457 | -0.72905 | 0.043763 | 0.373741 | 2 to 5 year      | 19 |
| -0.00027  | 0.00029  | 7.187155 | 0.29133  | -0.95662 | 0.027795 | 0.37041  | Less than 1 year | 2  |
| -0.00013  | 2.74E-05 | 7.615221 | -0.22678 | 0.973947 | 0.015185 | 0.373612 | 5 to 10 year     | 7  |
| -0.00013  | 2.74E-05 | 7.615221 | -0.22678 | 0.973947 | 0.015185 | 0.373612 | 5 to 10 year     | 7  |
| -0.00013  | 2.74E-05 | 7.615221 | -0.22678 | 0.973947 | 0.015185 | 0.373612 | 5 to 10 year     | 7  |
| -0.00013  | 2.74E-05 | 7.615221 | -0.22678 | 0.973947 | 0.015185 | 0.373612 | 5 to 10 year     | 7  |
| -0.0017   | -0.00024 | 7.246581 | -0.94994 | -0.31242 | 0.001859 | 0.392238 | Over 10 year     | 11 |
| -0.0017   | -0.00024 | 7.246581 | -0.94994 | -0.31242 | 0.001859 | 0.392238 | Over 10 year     | 11 |
| -0.0017   | -0.00024 | 7.246581 | -0.94994 | -0.31242 | 0.001859 | 0.392238 | Over 10 year     | 11 |
| -0.0017   | -0.00024 | 7.246581 | -0.94994 | -0.31242 | 0.001859 | 0.392238 | Over 10 year     | 11 |
| 0.000406  | 0.00014  | 7.523566 | 0.726085 | -0.6876  | 0.034812 | 0.339728 | 2 to 5 year      | 6  |
| 0.000406  | 0.00014  | 7.523566 | 0.726085 | -0.6876  | 0.034812 | 0.339728 | 2 to 5 year      | 6  |
| -0.00023  | 0.000335 | 8.117977 | -0.3198  | 0.947486 | 0.002843 | 0.430213 | 2 to 5 year      | 2  |
| -0.00023  | 0.000335 | 8.117977 | -0.3198  | 0.947486 | 0.002843 | 0.430213 | 2 to 5 year      | 2  |
| -0.00163  | 0.000282 | 6.320958 | -0.53334 | 0.845902 | 0.065325 | 0.32561  | 2 to 5 year      | 15 |
| -0.00163  | 0.000282 | 6.320958 | -0.53334 | 0.845902 | 0.065325 | 0.32561  | 2 to 5 year      | 15 |
| -0.00163  | 0.000282 | 6.320958 | -0.53334 | 0.845902 | 0.065325 | 0.32561  | 2 to 5 year      | 15 |
| -0.00163  | 0.000282 | 6.320958 | -0.53334 | 0.845902 | 0.065325 | 0.32561  | 2 to 5 year      | 15 |
| -0.00066  | 0.000356 | 7.34828  | 0.48702  | -0.87339 | 0.004815 | 0.391996 | 2 to 5 year      | 5  |
| -0.00066  | 0.000356 | 7.34828  | 0.48702  | -0.87339 | 0.004815 | 0.391996 | 2 to 5 year      | 5  |
| -0.00066  | 0.000356 | 7.34828  | 0.48702  | -0.87339 | 0.004815 | 0.391996 | 2 to 5 year      | 5  |
| -0.00037  | 8.18E-05 | 9.069148 | -0.38439 | -0.92317 | 0.000216 | 0.430965 | 1 to 2 year      | 2  |
| -8.74E-05 | 0.000909 | 7.239906 | 0.181161 | -0.98345 | 0.033777 | 0.366614 | 2 to 5 year      | 11 |
| -8.74E-05 | 0.000909 | 7.239906 | 0.181161 | -0.98345 | 0.033777 | 0.366614 | 2 to 5 year      | 11 |
| -8.74E-05 | 0.000909 | 7.239906 | 0.181161 | -0.98345 | 0.033777 | 0.366614 | 2 to 5 year      | 11 |
| -8.74E-05 | 0.000909 | 7.239906 | 0.181161 | -0.98345 | 0.033777 | 0.366614 | 2 to 5 year      | 11 |
| 0.001516  | 0.001423 | 5.770835 | -0.80301 | -0.59597 | 8.47E-05 | 0.403413 | 1 to 2 year      | 1  |
| 2.60E-05  | 0.000763 | 5.972576 | 0.988796 | 0.149274 | 0.012535 | 0.405665 | 2 to 5 year      | 1  |
| -0.00035  | 0.000564 | 6.56746  | -0.9893  | 0.145864 | 0.008895 | 0.411329 | Less than 1 year | 1  |

Table S2 - Anonymized database

|           |           |          |          |          |          |          |              |   |
|-----------|-----------|----------|----------|----------|----------|----------|--------------|---|
| -0.00087  | -0.00074  | 8.42246  | 0.919444 | -0.39322 | 0.000542 | 0.421315 | 2 to 5 year  | 1 |
| 0.000277  | -0.00146  | 6.302177 | -0.33404 | -0.94256 | 0.024641 | 0.373095 | 2 to 5 year  | 1 |
| 0.001349  | 0.000827  | 6.187137 | 0.943099 | -0.33251 | 0.021619 | 0.385329 | 1 to 2 year  | 1 |
| -5.00E-06 | 0.000193  | 8.795108 | -0.62124 | -0.78362 | 0.004689 | 0.411139 | Less than 1  | 1 |
| 0.000228  | -0.0001   | 8.286763 | -0.53674 | -0.84375 | 7.60E-06 | 0.371811 | 1 to 2 year  | 1 |
| 0.002791  | -0.00029  | 5.59797  | 0.994875 | -0.10112 | 0.000414 | 0.426809 | 2 to 5 year  | 2 |
| -0.00597  | -0.00256  | 9.492289 | 0.701878 | -0.7123  | 0.000216 | 0.430965 | 2 to 5 year  | 2 |
| -0.00081  | -0.00139  | 7.623704 | -0.89808 | 0.439828 | 0.026385 | 0.372594 | 1 to 2 year  | 2 |
| -0.00081  | -0.00139  | 7.623704 | -0.89808 | 0.439828 | 0.026385 | 0.372594 | 1 to 2 year  | 2 |
| 0.000526  | -0.00148  | 5.582147 | 0.572154 | -0.82015 | 0.025125 | 0.351967 | 1 to 2 year  | 2 |
| 0.000526  | -0.00148  | 5.582147 | 0.572154 | -0.82015 | 0.025125 | 0.351967 | 1 to 2 year  | 2 |
| -0.00243  | -0.00465  | 7.259941 | 0.896445 | 0.443156 | 6.97E-05 | 0.422515 | 2 to 5 year  | 2 |
| -0.00108  | 0.000143  | 9.864983 | -0.52344 | 0.852061 | 0.018665 | 0.380921 | 2 to 5 year  | 2 |
| 0.000249  | 0.000448  | 6.982077 | 0.999605 | 0.028089 | 0.010763 | 0.38082  | 1 to 2 year  | 2 |
| 0.000249  | 0.000448  | 6.982077 | 0.999605 | 0.028089 | 0.010763 | 0.38082  | 1 to 2 year  | 2 |
| 0.000918  | 0.000957  | 7.354772 | 0.678338 | 0.73475  | 0.014464 | 0.321976 | Less than 1  | 2 |
| -0.00103  | -0.0005   | 9.234109 | -0.53885 | 0.842403 | 0.077446 | 0.322683 | 2 to 5 year  | 2 |
| -0.00017  | -8.30E-05 | 10.68071 | -0.56871 | -0.82254 | 0.00063  | 0.42541  | 5 to 10 year | 2 |
| -0.0005   | 0.00166   | 6.079113 | -0.63624 | -0.77149 | 0.009163 | 0.405865 | 1 to 2 year  | 2 |
| 0.000199  | -0.00019  | 8.966571 | -0.91646 | -0.40012 | 0.004935 | 0.377711 | 5 to 10 year | 2 |
| -0.00237  | 0.000735  | 6.755063 | 0.091776 | -0.99578 | 0.017132 | 0.354799 | 2 to 5 year  | 2 |
| 0.00018   | -0.00015  | 9.943292 | 0.995409 | -0.09571 | 0.010153 | 0.375219 | 2 to 5 year  | 2 |
| 0.001771  | 0.001576  | 6.105651 | -0.99955 | 0.029905 | 0.000843 | 0.430229 | Over 10 year | 2 |
| 0.000971  | 0.00096   | 6.294988 | 0.703294 | -0.7109  | 0.039269 | 0.364845 | 5 to 10 year | 2 |
| 0.000425  | 0.000244  | 7.423181 | -0.58327 | 0.81228  | 0.006118 | 0.419368 | 1 to 2 year  | 2 |
| 0.000162  | 0.001492  | 7.414687 | 0.046305 | 0.998927 | 0.002787 | 0.412379 | 2 to 5 year  | 2 |
| 0.000162  | 0.001492  | 7.414687 | 0.046305 | 0.998927 | 0.002787 | 0.412379 | 2 to 5 year  | 2 |
| -0.00048  | -0.00042  | 10.2381  | -0.54978 | 0.835311 | 0.021104 | 0.374728 | 2 to 5 year  | 3 |
| -0.00102  | -0.00061  | 11.12156 | 0.96399  | 0.265938 | 0.050741 | 0.34748  | 1 to 2 year  | 3 |
| -0.00102  | -0.00061  | 11.12156 | 0.96399  | 0.265938 | 0.050741 | 0.34748  | 1 to 2 year  | 3 |
| 0.000476  | -0.0004   | 9.722341 | 0.966119 | 0.258098 | 0.036207 | 0.34751  | 5 to 10 year | 3 |
| 0.000476  | -0.0004   | 9.722341 | 0.966119 | 0.258098 | 0.036207 | 0.34751  | 5 to 10 year | 3 |
| 0.001039  | 0         | 7.701547 | 0.757136 | -0.65326 | 0.030647 | 0.366727 | 5 to 10 year | 3 |
| 3.00E-06  | -0.00061  | 12.34398 | 0.695892 | 0.718146 | 3.18E-05 | 0.406127 | 2 to 5 year  | 3 |
| -0.00061  | -0.00019  | 8.427426 | -0.53394 | 0.845524 | 0.000184 | 0.415632 | 2 to 5 year  | 3 |
| -0.00324  | -9.00E-04 | 12.5425  | -0.65231 | 0.757956 | 0.052029 | 0.311606 | 2 to 5 year  | 3 |
| 0.001345  | 0.002955  | 5.291983 | -0.99946 | -0.03292 | 0.001659 | 0.403552 | 2 to 5 year  | 4 |
| 0.001345  | 0.002955  | 5.291983 | -0.99946 | -0.03292 | 0.001659 | 0.403552 | 2 to 5 year  | 4 |
| 0.001345  | 0.002955  | 5.291983 | -0.99946 | -0.03292 | 0.001659 | 0.403552 | 2 to 5 year  | 4 |
| 0.001345  | 0.002955  | 5.291983 | -0.99946 | -0.03292 | 0.001659 | 0.403552 | 2 to 5 year  | 4 |
| -0.00043  | 0.000222  | 6.91947  | -0.59886 | -0.80085 | 0.003814 | 0.39002  | 2 to 5 year  | 4 |
| -0.00043  | 0.000222  | 6.91947  | -0.59886 | -0.80085 | 0.003814 | 0.39002  | 2 to 5 year  | 4 |
| 0.000486  | 0.000696  | 7.21388  | -0.99999 | 0.004943 | 0.003964 | 0.413122 | 5 to 10 year | 4 |
| 0.001133  | 0.000546  | 6.975701 | -0.65862 | 0.752475 | 0.004293 | 0.399878 | 5 to 10 year | 4 |
| 0.002444  | -0.00025  | 6.068515 | -0.99992 | -0.01246 | 0.00288  | 0.395734 | 2 to 5 year  | 4 |
| -0.00031  | 0.000414  | 6.752109 | -0.48257 | -0.87585 | 0.000372 | 0.396149 | 2 to 5 year  | 4 |
| -0.00031  | 0.000414  | 6.752109 | -0.48257 | -0.87585 | 0.000372 | 0.396149 | 2 to 5 year  | 4 |
| 0.000106  | 0.000435  | 10.30726 | -0.07783 | 0.996966 | 0.000332 | 0.395629 | 5 to 10 year | 4 |
| -0.00087  | -0.00049  | 8.240852 | 0.281379 | -0.9596  | 0.004232 | 0.388678 | 1 to 2 year  | 4 |
| -0.00087  | -0.00049  | 8.240852 | 0.281379 | -0.9596  | 0.004232 | 0.388678 | 1 to 2 year  | 4 |



Table S2 - Anonymized database

|           |           |          |          |          |          |          |              |   |
|-----------|-----------|----------|----------|----------|----------|----------|--------------|---|
| -0.00087  | -0.00049  | 8.240852 | 0.281379 | -0.9596  | 0.004232 | 0.388678 | 1 to 2 year  | 4 |
| 0.000332  | 0.001614  | 5.844646 | 0.999888 | 0.014955 | 0.022942 | 0.378116 | Over 10 ye   | 4 |
| -0.00018  | 0.000166  | 9.809126 | -0.98811 | -0.15374 | 0.017034 | 0.383016 | 2 to 5 year  | 4 |
| -0.00091  | -0.00011  | 7.181785 | 0.96959  | 0.244737 | 0.003353 | 0.400542 | 2 to 5 year  | 5 |
| -0.00091  | -0.00011  | 7.181785 | 0.96959  | 0.244737 | 0.003353 | 0.400542 | 2 to 5 year  | 5 |
| -0.00091  | -0.00011  | 7.181785 | 0.96959  | 0.244737 | 0.003353 | 0.400542 | 2 to 5 year  | 5 |
| -0.00013  | 0.000117  | 9.363936 | -0.85537 | -0.51802 | 0.068087 | 0.336834 | 2 to 5 year  | 5 |
| 0.000384  | 0.000594  | 7.174697 | -0.35256 | 0.935788 | 0.042672 | 0.359447 | 2 to 5 year  | 5 |
| 0.000384  | 0.000594  | 7.174697 | -0.35256 | 0.935788 | 0.042672 | 0.359447 | 2 to 5 year  | 5 |
| 0.000384  | 0.000594  | 7.174697 | -0.35256 | 0.935788 | 0.042672 | 0.359447 | 2 to 5 year  | 5 |
| -4.00E-05 | 0.000166  | 6.602221 | -0.24178 | 0.97033  | 0.042414 | 0.328016 | 2 to 5 year  | 5 |
| -4.00E-05 | 0.000166  | 6.602221 | -0.24178 | 0.97033  | 0.042414 | 0.328016 | 2 to 5 year  | 5 |
| -0.00181  | -3.80E-05 | 11.36418 | -0.63714 | 0.770751 | 0.001584 | 0.411519 | 5 to 10 year | 5 |
| -0.00028  | -0.00062  | 10.31837 | -0.92986 | -0.3679  | 0.062812 | 0.32094  | 2 to 5 year  | 5 |
| -0.00028  | -0.00062  | 10.31837 | -0.92986 | -0.3679  | 0.062812 | 0.32094  | 2 to 5 year  | 5 |
| 0.002301  | 0.003581  | 5.215646 | 0.603308 | 0.797508 | 0.01096  | 0.389974 | 1 to 2 year  | 5 |
| 0.002301  | 0.003581  | 5.215646 | 0.603308 | 0.797508 | 0.01096  | 0.389974 | 1 to 2 year  | 5 |
| 0.00364   | 0.001644  | 5.660378 | -0.83004 | -0.55771 | 0.062955 | 0.326097 | 1 to 2 year  | 5 |
| 0.00364   | 0.001644  | 5.660378 | -0.83004 | -0.55771 | 0.062955 | 0.326097 | 1 to 2 year  | 5 |
| 8.50E-05  | -0.00011  | 8.182613 | 0.65839  | -0.75268 | 0.00036  | 0.432406 | 2 to 5 year  | 5 |
| 8.50E-05  | -0.00011  | 8.182613 | 0.65839  | -0.75268 | 0.00036  | 0.432406 | 2 to 5 year  | 5 |
| 8.50E-05  | -0.00011  | 8.182613 | 0.65839  | -0.75268 | 0.00036  | 0.432406 | 2 to 5 year  | 5 |
| -0.00014  | 0.000165  | 10.64129 | 0.875599 | -0.48304 | 0.003819 | 0.382867 | 2 to 5 year  | 5 |
| -0.00014  | 0.000165  | 10.64129 | 0.875599 | -0.48304 | 0.003819 | 0.382867 | 2 to 5 year  | 5 |
| 0.00096   | 9.00E-05  | 6.846452 | 0.995135 | -0.09852 | 0.035441 | 0.339374 | 2 to 5 year  | 5 |
| 0.00096   | 9.00E-05  | 6.846452 | 0.995135 | -0.09852 | 0.035441 | 0.339374 | 2 to 5 year  | 5 |
| 0.001131  | 0.00063   | 7.54068  | 0.908182 | -0.41858 | 0.339062 | 0.343287 | 5 to 10 year | 5 |
| 0.001131  | 0.00063   | 7.54068  | 0.908182 | -0.41858 | 0.339062 | 0.343287 | 5 to 10 year | 5 |
| 0.001447  | 0.000749  | 5.42723  | 0.013815 | 0.999905 | 0.000165 | 0.401891 | Over 10 ye   | 5 |
| -0.00011  | -0.00023  | 10.92632 | 0.31408  | -0.9494  | 0.064053 | 0.313069 | Over 10 ye   | 5 |
| -0.00048  | -0.00042  | 8.983812 | -0.95159 | 0.307365 | 0.001385 | 0.40293  | 2 to 5 year  | 5 |
| -0.00048  | -0.00042  | 8.983812 | -0.95159 | 0.307365 | 0.001385 | 0.40293  | 2 to 5 year  | 5 |
| 0.000585  | -9.20E-05 | 7.951361 | 0.67058  | 0.741837 | 0.039557 | 0.340828 | 2 to 5 year  | 5 |
| 0.000585  | -9.20E-05 | 7.951361 | 0.67058  | 0.741837 | 0.039557 | 0.340828 | 2 to 5 year  | 5 |
| -0.002    | -0.0005   | 7.043015 | -0.99784 | -0.06576 | 0.002133 | 0.399649 | 2 to 5 year  | 6 |
| -0.002    | -0.0005   | 7.043015 | -0.99784 | -0.06576 | 0.002133 | 0.399649 | 2 to 5 year  | 6 |
| -0.002    | -0.0005   | 7.043015 | -0.99784 | -0.06576 | 0.002133 | 0.399649 | 2 to 5 year  | 6 |
| -0.002    | -0.0005   | 7.043015 | -0.99784 | -0.06576 | 0.002133 | 0.399649 | 2 to 5 year  | 6 |
| 2.80E-05  | 0.000158  | 7.935713 | 0.986909 | -0.16128 | 0.01295  | 0.403363 | 5 to 10 year | 6 |
| -3.40E-05 | -0.00087  | 9.206155 | -0.75518 | 0.65552  | 0.021835 | 0.387149 | 5 to 10 year | 6 |
| -0.00126  | 0.000191  | 7.233391 | 0.378898 | 0.925438 | 0.008101 | 0.393838 | 1 to 2 year  | 6 |
| -0.00249  | -0.00183  | 7.791164 | 0.833364 | 0.552724 | 0.000654 | 0.433276 | 5 to 10 year | 6 |
| -0.00249  | -0.00183  | 7.791164 | 0.833364 | 0.552724 | 0.000654 | 0.433276 | 5 to 10 year | 6 |
| -0.00037  | 0.000395  | 7.243243 | -0.01524 | 0.999884 | 0.037988 | 0.325697 | 2 to 5 year  | 6 |
| -0.00037  | 0.000395  | 7.243243 | -0.01524 | 0.999884 | 0.037988 | 0.325697 | 2 to 5 year  | 6 |
| 0.002139  | -0.00178  | 6.95804  | -0.13969 | 0.990196 | 0.009714 | 0.385306 | 1 to 2 year  | 7 |
| 0.002139  | -0.00178  | 6.95804  | -0.13969 | 0.990196 | 0.009714 | 0.385306 | 1 to 2 year  | 7 |
| 0.002139  | -0.00178  | 6.95804  | -0.13969 | 0.990196 | 0.009714 | 0.385306 | 1 to 2 year  | 7 |
| 0.000545  | -0.00015  | 7.788049 | 0.711975 | -0.70221 | 0.079883 | 0.293708 | 2 to 5 year  | 7 |
| 0.000545  | -0.00015  | 7.788049 | 0.711975 | -0.70221 | 0.079883 | 0.293708 | 2 to 5 year  | 7 |

Table S2 - Anonymized database

|          |           |          |          |          |          |          |             |    |
|----------|-----------|----------|----------|----------|----------|----------|-------------|----|
| 0.004227 | 0.002337  | 5.757184 | -0.80577 | -0.59222 | 0.000278 | 0.402242 | Over 10 ye  | 7  |
| 0.004227 | 0.002337  | 5.757184 | -0.80577 | -0.59222 | 0.000278 | 0.402242 | Over 10 ye  | 7  |
| 0.000112 | 0.000241  | 7.972994 | 0.449417 | 0.893322 | 0.002402 | 0.419275 | 2 to 5 year | 7  |
| 0.000112 | 0.000241  | 7.972994 | 0.449417 | 0.893322 | 0.002402 | 0.419275 | 2 to 5 year | 7  |
| 0.000112 | 0.000241  | 7.972994 | 0.449417 | 0.893322 | 0.002402 | 0.419275 | 2 to 5 year | 7  |
| 0.000112 | 0.000241  | 7.972994 | 0.449417 | 0.893322 | 0.002402 | 0.419275 | 2 to 5 year | 7  |
| 0.001105 | 0.000415  | 5.860742 | -0.63306 | -0.7741  | 0.000107 | 0.404435 | 5 to 10 yea | 7  |
| -0.00063 | -6.20E-05 | 8.821591 | -0.96326 | -0.26858 | 0.050648 | 0.295265 | 2 to 5 year | 7  |
| -0.00063 | -6.20E-05 | 8.821591 | -0.96326 | -0.26858 | 0.050648 | 0.295265 | 2 to 5 year | 7  |
| 0.000179 | -0.00019  | 9.676757 | 0.818019 | 0.575191 | 0.014334 | 0.395231 | Over 10 ye  | 7  |
| 0.000179 | -0.00019  | 9.676757 | 0.818019 | 0.575191 | 0.014334 | 0.395231 | Over 10 ye  | 7  |
| 0.000179 | -0.00019  | 9.676757 | 0.818019 | 0.575191 | 0.014334 | 0.395231 | Over 10 ye  | 7  |
| 0.000179 | -0.00019  | 9.676757 | 0.818019 | 0.575191 | 0.014334 | 0.395231 | Over 10 ye  | 7  |
| -0.0006  | 0.001251  | 7.111355 | -0.90249 | 0.430702 | 0.002676 | 0.421914 | 5 to 10 yea | 7  |
| 0.000708 | 0.000582  | 7.037695 | 0.990504 | 0.137486 | 0.014558 | 0.400028 | Over 10 ye  | 7  |
| 0.000708 | 0.000582  | 7.037695 | 0.990504 | 0.137486 | 0.014558 | 0.400028 | Over 10 ye  | 7  |
| -0.00029 | -6.10E-05 | 10.92574 | 0.009512 | -0.99995 | 0.040339 | 0.342214 | 2 to 5 year | 8  |
| -0.00029 | -6.10E-05 | 10.92574 | 0.009512 | -0.99995 | 0.040339 | 0.342214 | 2 to 5 year | 8  |
| -0.00149 | -0.00148  | 8.976081 | -0.75992 | 0.650019 | 0.009797 | 0.373252 | 2 to 5 year | 8  |
| -0.00149 | -0.00148  | 8.976081 | -0.75992 | 0.650019 | 0.009797 | 0.373252 | 2 to 5 year | 8  |
| -0.00149 | -0.00148  | 8.976081 | -0.75992 | 0.650019 | 0.009797 | 0.373252 | 2 to 5 year | 8  |
| 0.003221 | 0.001054  | 5.788663 | 0.94556  | 0.325447 | 0.005833 | 0.395439 | 2 to 5 year | 8  |
| 0.002565 | 0.000252  | 7.01588  | -0.81028 | -0.58604 | 0.008547 | 0.386603 | 5 to 10 yea | 8  |
| -0.00125 | -0.00089  | 6.507705 | 0.751696 | -0.65951 | 0.059097 | 0.317329 | 2 to 5 year | 8  |
| -0.00125 | -0.00089  | 6.507705 | 0.751696 | -0.65951 | 0.059097 | 0.317329 | 2 to 5 year | 8  |
| 0.000404 | -0.00101  | 6.550444 | -0.98501 | 0.172514 | 0.000392 | 0.415925 | 5 to 10 yea | 9  |
| 0.000404 | -0.00101  | 6.550444 | -0.98501 | 0.172514 | 0.000392 | 0.415925 | 5 to 10 yea | 9  |
| 0.000404 | -0.00101  | 6.550444 | -0.98501 | 0.172514 | 0.000392 | 0.415925 | 5 to 10 yea | 9  |
| 0.000265 | -0.00173  | 8.467335 | 0.624563 | -0.78097 | 0.032531 | 0.341907 | 2 to 5 year | 9  |
| 0.000265 | -0.00173  | 8.467335 | 0.624563 | -0.78097 | 0.032531 | 0.341907 | 2 to 5 year | 9  |
| 0.000265 | -0.00173  | 8.467335 | 0.624563 | -0.78097 | 0.032531 | 0.341907 | 2 to 5 year | 9  |
| 0.000265 | -0.00173  | 8.467335 | 0.624563 | -0.78097 | 0.032531 | 0.341907 | 2 to 5 year | 9  |
| 2.20E-05 | -0.00026  | 8.60884  | 0.084634 | -0.99641 | 1.55E-05 | 0.411413 | 2 to 5 year | 9  |
| 2.20E-05 | -0.00026  | 8.60884  | 0.084634 | -0.99641 | 1.55E-05 | 0.411413 | 2 to 5 year | 9  |
| 2.20E-05 | -0.00026  | 8.60884  | 0.084634 | -0.99641 | 1.55E-05 | 0.411413 | 2 to 5 year | 9  |
| 0.000705 | 0.000384  | 6.483116 | -0.75141 | 0.659836 | 0.016717 | 0.333957 | Over 10 ye  | 9  |
| 0.000705 | 0.000384  | 6.483116 | -0.75141 | 0.659836 | 0.016717 | 0.333957 | Over 10 ye  | 9  |
| 0.000705 | 0.000384  | 6.483116 | -0.75141 | 0.659836 | 0.016717 | 0.333957 | Over 10 ye  | 9  |
| 0.002295 | 0.00551   | 4.841191 | -0.19558 | 0.980687 | 0.006205 | 0.387621 | 5 to 10 yea | 10 |
| 0.002295 | 0.00551   | 4.841191 | -0.19558 | 0.980687 | 0.006205 | 0.387621 | 5 to 10 yea | 10 |
| 0.002295 | 0.00551   | 4.841191 | -0.19558 | 0.980687 | 0.006205 | 0.387621 | 5 to 10 yea | 10 |
| -0.00351 | -0.00493  | 9.698227 | 0.9886   | -0.15057 | 0.05117  | 0.320754 | 5 to 10 yea | 10 |
| -0.00351 | -0.00493  | 9.698227 | 0.9886   | -0.15057 | 0.05117  | 0.320754 | 5 to 10 yea | 10 |
| 0.00096  | 0.005301  | 5.114022 | 0.944001 | -0.32994 | 4.06E-05 | 0.399017 | 5 to 10 yea | 10 |
| 0.00096  | 0.005301  | 5.114022 | 0.944001 | -0.32994 | 4.06E-05 | 0.399017 | 5 to 10 yea | 10 |
| 0.00096  | 0.005301  | 5.114022 | 0.944001 | -0.32994 | 4.06E-05 | 0.399017 | 5 to 10 yea | 10 |
| 0.00096  | 0.005301  | 5.114022 | 0.944001 | -0.32994 | 4.06E-05 | 0.399017 | 5 to 10 yea | 10 |
| 0.00096  | 0.005301  | 5.114022 | 0.944001 | -0.32994 | 4.06E-05 | 0.399017 | 5 to 10 yea | 10 |
| -0.00019 | 0.000252  | 9.080857 | -0.15098 | 0.988537 | 0.023393 | 0.371974 | Over 10 ye  | 10 |
| -0.00019 | 0.000252  | 9.080857 | -0.15098 | 0.988537 | 0.023393 | 0.371974 | Over 10 ye  | 10 |

Table S2 - Anonymized database

|           |           |          |          |          |          |          |              |    |
|-----------|-----------|----------|----------|----------|----------|----------|--------------|----|
| 3.30E-05  | 0.000103  | 7.984262 | 0.497598 | -0.86741 | 0.004843 | 0.391127 | 5 to 10 year | 11 |
| 3.30E-05  | 0.000103  | 7.984262 | 0.497598 | -0.86741 | 0.004843 | 0.391127 | 5 to 10 year | 11 |
| 3.30E-05  | 0.000103  | 7.984262 | 0.497598 | -0.86741 | 0.004843 | 0.391127 | 5 to 10 year | 11 |
| -0.00037  | 0.000636  | 6.427949 | -0.7724  | -0.63513 | 0.003948 | 0.402743 | Over 10 ye   | 11 |
| -0.00037  | 0.000636  | 6.427949 | -0.7724  | -0.63513 | 0.003948 | 0.402743 | Over 10 ye   | 11 |
| -0.00037  | 0.000636  | 6.427949 | -0.7724  | -0.63513 | 0.003948 | 0.402743 | Over 10 ye   | 11 |
| 0.000382  | -0.00059  | 12.14705 | 0.290701 | 0.956814 | 0.001242 | 0.395773 | 1 to 2 year  | 11 |
| 0.000382  | -0.00059  | 12.14705 | 0.290701 | 0.956814 | 0.001242 | 0.395773 | 1 to 2 year  | 11 |
| 0.000373  | 0.000481  | 7.152483 | -0.42747 | -0.90403 | 0.016893 | 0.387055 | 2 to 5 year  | 11 |
| 0.000373  | 0.000481  | 7.152483 | -0.42747 | -0.90403 | 0.016893 | 0.387055 | 2 to 5 year  | 11 |
| 0.000373  | 0.000481  | 7.152483 | -0.42747 | -0.90403 | 0.016893 | 0.387055 | 2 to 5 year  | 11 |
| 0.000373  | 0.000481  | 7.152483 | -0.42747 | -0.90403 | 0.016893 | 0.387055 | 2 to 5 year  | 11 |
| 0.000373  | 0.000481  | 7.152483 | -0.42747 | -0.90403 | 0.016893 | 0.387055 | 2 to 5 year  | 11 |
| 0.000373  | 0.000481  | 7.152483 | -0.42747 | -0.90403 | 0.016893 | 0.387055 | 2 to 5 year  | 11 |
| 3.70E-05  | 0.000344  | 6.792089 | -0.99023 | 0.139451 | 0.012965 | 0.387951 | 2 to 5 year  | 12 |
| 3.70E-05  | 0.000344  | 6.792089 | -0.99023 | 0.139451 | 0.012965 | 0.387951 | 2 to 5 year  | 12 |
| 3.70E-05  | 0.000344  | 6.792089 | -0.99023 | 0.139451 | 0.012965 | 0.387951 | 2 to 5 year  | 12 |
| 3.70E-05  | 0.000344  | 6.792089 | -0.99023 | 0.139451 | 0.012965 | 0.387951 | 2 to 5 year  | 12 |
| -7.20E-05 | -4.70E-05 | 11.12294 | 0.04965  | 0.998767 | 0.103332 | 0.286539 | Over 10 ye   | 12 |
| -7.20E-05 | -4.70E-05 | 11.12294 | 0.04965  | 0.998767 | 0.103332 | 0.286539 | Over 10 ye   | 12 |
| -7.20E-05 | -4.70E-05 | 11.12294 | 0.04965  | 0.998767 | 0.103332 | 0.286539 | Over 10 ye   | 12 |
| -7.20E-05 | -4.70E-05 | 11.12294 | 0.04965  | 0.998767 | 0.103332 | 0.286539 | Over 10 ye   | 12 |
| 0.000125  | 0.000106  | 8.09158  | -0.47147 | -0.88188 | 0.001293 | 0.395439 | 5 to 10 year | 12 |
| 0.000125  | 0.000106  | 8.09158  | -0.47147 | -0.88188 | 0.001293 | 0.395439 | 5 to 10 year | 12 |
| 0.000125  | 0.000106  | 8.09158  | -0.47147 | -0.88188 | 0.001293 | 0.395439 | 5 to 10 year | 12 |
| -3.90E-05 | -0.00066  | 10.38832 | -0.13929 | -0.99025 | 0.046155 | 0.323061 | Over 10 ye   | 15 |
| -3.90E-05 | -0.00066  | 10.38832 | -0.13929 | -0.99025 | 0.046155 | 0.323061 | Over 10 ye   | 15 |
| -3.90E-05 | -0.00066  | 10.38832 | -0.13929 | -0.99025 | 0.046155 | 0.323061 | Over 10 ye   | 15 |
| -3.90E-05 | -0.00066  | 10.38832 | -0.13929 | -0.99025 | 0.046155 | 0.323061 | Over 10 ye   | 15 |
| -3.90E-05 | -0.00066  | 10.38832 | -0.13929 | -0.99025 | 0.046155 | 0.323061 | Over 10 ye   | 15 |
| -0.00045  | -0.0004   | 9.139278 | -0.97586 | -0.21837 | 0.009431 | 0.390315 | 2 to 5 year  | 20 |
| -0.00045  | -0.0004   | 9.139278 | -0.97586 | -0.21837 | 0.009431 | 0.390315 | 2 to 5 year  | 20 |
| -0.00045  | -0.0004   | 9.139278 | -0.97586 | -0.21837 | 0.009431 | 0.390315 | 2 to 5 year  | 20 |
| -0.00045  | -0.0004   | 9.139278 | -0.97586 | -0.21837 | 0.009431 | 0.390315 | 2 to 5 year  | 20 |
| -0.00018  | 0.000577  | 7.314416 | 0.452999 | 0.891511 | 0.078283 | 0.307638 | 5 to 10 year | 11 |
| -0.00018  | 0.000577  | 7.314416 | 0.452999 | 0.891511 | 0.078283 | 0.307638 | 5 to 10 year | 11 |
| -0.00018  | 0.000577  | 7.314416 | 0.452999 | 0.891511 | 0.078283 | 0.307638 | 5 to 10 year | 11 |
| -0.00018  | 0.000577  | 7.314416 | 0.452999 | 0.891511 | 0.078283 | 0.307638 | 5 to 10 year | 11 |
| -0.00354  | -0.0001   | 7.882977 | 0.95887  | -0.28384 | 0.000103 | 0.423653 | 1 to 2 year  | 12 |
| -0.00354  | -0.0001   | 7.882977 | 0.95887  | -0.28384 | 0.000103 | 0.423653 | 1 to 2 year  | 12 |
| -0.00354  | -0.0001   | 7.882977 | 0.95887  | -0.28384 | 0.000103 | 0.423653 | 1 to 2 year  | 12 |
| -0.00023  | 0.000294  | 7.396209 | -0.85928 | 0.511503 | 0.102343 | 0.287067 | 5 to 10 year | 13 |
| -0.00023  | 0.000294  | 7.396209 | -0.85928 | 0.511503 | 0.102343 | 0.287067 | 5 to 10 year | 13 |
| -0.00023  | 0.000294  | 7.396209 | -0.85928 | 0.511503 | 0.102343 | 0.287067 | 5 to 10 year | 13 |
| 0.00033   | 0.000413  | 7.68102  | 0.622847 | 0.782343 | 0.01425  | 0.411578 | Over 10 ye   | 14 |
| 0.00033   | 0.000413  | 7.68102  | 0.622847 | 0.782343 | 0.01425  | 0.411578 | Over 10 ye   | 14 |
| 0.00033   | 0.000413  | 7.68102  | 0.622847 | 0.782343 | 0.01425  | 0.411578 | Over 10 ye   | 14 |
| -0.00028  | 0.000453  | 6.854851 | 0.797983 | 0.60268  | 0.009312 | 0.395292 | 2 to 5 year  | 16 |
| -0.00028  | 0.000453  | 6.854851 | 0.797983 | 0.60268  | 0.009312 | 0.395292 | 2 to 5 year  | 16 |
| -0.00028  | 0.000453  | 6.854851 | 0.797983 | 0.60268  | 0.009312 | 0.395292 | 2 to 5 year  | 16 |

Table S2 - Anonymized database

|           |          |          |          |          |          |          |             |    |
|-----------|----------|----------|----------|----------|----------|----------|-------------|----|
| -0.00028  | 0.000453 | 6.854851 | 0.797983 | 0.60268  | 0.009312 | 0.395292 | 2 to 5 year | 16 |
| -0.00054  | -0.00053 | 7.974645 | 0.37949  | -0.9252  | 0.003664 | 0.395188 | Over 10 ye  | 16 |
| -0.00054  | -0.00053 | 7.974645 | 0.37949  | -0.9252  | 0.003664 | 0.395188 | Over 10 ye  | 16 |
| -0.00054  | -0.00053 | 7.974645 | 0.37949  | -0.9252  | 0.003664 | 0.395188 | Over 10 ye  | 16 |
| -0.00054  | -0.00053 | 7.974645 | 0.37949  | -0.9252  | 0.003664 | 0.395188 | Over 10 ye  | 16 |
| -0.00054  | -0.00053 | 7.974645 | 0.37949  | -0.9252  | 0.003664 | 0.395188 | Over 10 ye  | 16 |
| -0.00054  | -0.00053 | 7.974645 | 0.37949  | -0.9252  | 0.003664 | 0.395188 | Over 10 ye  | 16 |
| -0.00317  | -0.00758 | 8.285575 | 0.381979 | -0.92417 | 0.008867 | 0.385166 | Over 10 ye  | 17 |
| -0.00317  | -0.00758 | 8.285575 | 0.381979 | -0.92417 | 0.008867 | 0.385166 | Over 10 ye  | 17 |
| -0.00317  | -0.00758 | 8.285575 | 0.381979 | -0.92417 | 0.008867 | 0.385166 | Over 10 ye  | 17 |
| -0.00317  | -0.00758 | 8.285575 | 0.381979 | -0.92417 | 0.008867 | 0.385166 | Over 10 ye  | 17 |
| -0.00108  | -0.00118 | 9.110424 | 0.81459  | -0.58004 | 0.043763 | 0.373741 | 2 to 5 year | 24 |
| -0.00108  | -0.00118 | 9.110424 | 0.81459  | -0.58004 | 0.043763 | 0.373741 | 2 to 5 year | 24 |
| -0.00108  | -0.00118 | 9.110424 | 0.81459  | -0.58004 | 0.043763 | 0.373741 | 2 to 5 year | 24 |
| -0.00108  | -0.00118 | 9.110424 | 0.81459  | -0.58004 | 0.043763 | 0.373741 | 2 to 5 year | 24 |
| -0.00108  | -0.00118 | 9.110424 | 0.81459  | -0.58004 | 0.043763 | 0.373741 | 2 to 5 year | 24 |
| -0.00108  | -0.00118 | 9.110424 | 0.81459  | -0.58004 | 0.043763 | 0.373741 | 2 to 5 year | 24 |
| -0.00108  | -0.00118 | 9.110424 | 0.81459  | -0.58004 | 0.043763 | 0.373741 | 2 to 5 year | 24 |
| -0.00108  | -0.00118 | 9.110424 | 0.81459  | -0.58004 | 0.043763 | 0.373741 | 2 to 5 year | 24 |
| -0.00108  | -0.00118 | 9.110424 | 0.81459  | -0.58004 | 0.043763 | 0.373741 | 2 to 5 year | 24 |
| -0.00108  | -0.00118 | 9.110424 | 0.81459  | -0.58004 | 0.043763 | 0.373741 | 2 to 5 year | 24 |
| -0.00108  | -0.00118 | 9.110424 | 0.81459  | -0.58004 | 0.043763 | 0.373741 | 2 to 5 year | 24 |
| 0.000928  | 0.000315 | 7.07586  | -0.01795 | -0.99984 | 0.047869 | 0.34643  | 5 to 10 yea | 26 |
| 0.000928  | 0.000315 | 7.07586  | -0.01795 | -0.99984 | 0.047869 | 0.34643  | 5 to 10 yea | 26 |
| 0.000928  | 0.000315 | 7.07586  | -0.01795 | -0.99984 | 0.047869 | 0.34643  | 5 to 10 yea | 26 |
| 0.000928  | 0.000315 | 7.07586  | -0.01795 | -0.99984 | 0.047869 | 0.34643  | 5 to 10 yea | 26 |
| -0.00069  | -0.00049 | 8.958983 | 0.132123 | -0.99123 | 0.044799 | 0.359558 | Over 10 ye  | 34 |
| -0.00069  | -0.00049 | 8.958983 | 0.132123 | -0.99123 | 0.044799 | 0.359558 | Over 10 ye  | 34 |
| -0.00069  | -0.00049 | 8.958983 | 0.132123 | -0.99123 | 0.044799 | 0.359558 | Over 10 ye  | 34 |
| -0.00069  | -0.00049 | 8.958983 | 0.132123 | -0.99123 | 0.044799 | 0.359558 | Over 10 ye  | 34 |
| -0.00069  | -0.00049 | 8.958983 | 0.132123 | -0.99123 | 0.044799 | 0.359558 | Over 10 ye  | 34 |
| -0.00069  | -0.00049 | 8.958983 | 0.132123 | -0.99123 | 0.044799 | 0.359558 | Over 10 ye  | 34 |
| -0.00069  | -0.00049 | 8.958983 | 0.132123 | -0.99123 | 0.044799 | 0.359558 | Over 10 ye  | 34 |
| -0.00069  | -0.00049 | 8.958983 | 0.132123 | -0.99123 | 0.044799 | 0.359558 | Over 10 ye  | 34 |
| -0.00069  | -0.00049 | 8.958983 | 0.132123 | -0.99123 | 0.044799 | 0.359558 | Over 10 ye  | 34 |
| -0.00069  | -0.00114 | 8.010088 | 0.5936   | -0.80476 | 0.003718 | 0.39511  | Over 10 ye  | 15 |
| -0.0004   | 0.000957 | 6.641533 | 0.442236 | 0.896899 | 0.005228 | 0.388217 | 2 to 5 year | 20 |
| -0.00133  | 5.61E-05 | 8.335838 | -0.93209 | -0.36222 | 0.036897 | 0.350057 | 5 to 10 yea | 12 |
| 0.000137  | -0.00059 | 9.942574 | 0.071324 | 0.997453 | 0.021988 | 0.380222 | 5 to 10 yea | 2  |
| -0.00032  | -0.00022 | 7.557192 | 0.915366 | -0.40262 | 0.00028  | 0.423083 | Over 10 ye  | 5  |
| 0.002679  | 0.000302 | 7.512269 | 0.558958 | -0.8292  | 0.002882 | 0.388022 | 2 to 5 year | 8  |
| -0.00133  | 5.61E-05 | 8.335838 | -0.93209 | -0.36222 | 0.036897 | 0.350057 | 5 to 10 yea | 12 |
| -4.84E-05 | 0.000152 | 7.918477 | -0.79487 | 0.606782 | 0.003819 | 0.382867 | 2 to 5 year | 3  |
| -0.00062  | 0.002157 | 6.203242 | 0.859966 | 0.510351 | 0.005228 | 0.388217 | 2 to 5 year | 25 |
| 0.000858  | -0.00035 | 6.141755 | -0.20772 | 0.978188 | 0.004976 | 0.409187 | 2 to 5 year | 2  |
| -0.00024  | -0.00318 | 12.51608 | -0.20785 | 0.978162 | 0.000148 | 0.401935 | Over 10 ye  | 5  |
| -0.00062  | 0.002157 | 6.203242 | 0.859966 | 0.510351 | 0.005228 | 0.388217 | 2 to 5 year | 25 |
| -0.00062  | 0.002157 | 6.203242 | 0.859966 | 0.510351 | 0.005228 | 0.388217 | 2 to 5 year | 25 |
| 0.000253  | 2.23E-05 | 9.858754 | 0.137937 | -0.99044 | 0.003718 | 0.399419 | 2 to 5 year | 16 |
| -0.00091  | 0.000146 | 11.52142 | 0.881388 | -0.47239 | 0.021245 | 0.375289 | 5 to 10 yea | 12 |
| -0.00266  | -0.00119 | 7.505739 | 0.449955 | -0.89305 | 0.019117 | 0.376947 | 2 to 5 year | 3  |

Table S2 - Anonymized database

|           |           |          |          |          |          |          |             |    |
|-----------|-----------|----------|----------|----------|----------|----------|-------------|----|
| -0.00062  | 0.002157  | 6.203242 | 0.859966 | 0.510351 | 0.005228 | 0.388217 | 2 to 5 year | 25 |
| 5.80E-07  | -0.00012  | 10.36644 | 0.996778 | -0.08021 | 0.002177 | 0.390538 | Over 10 ye  | 7  |
| -0.0004   | 0.000957  | 6.641533 | 0.442236 | 0.896899 | 0.005228 | 0.388217 | 2 to 5 year | 20 |
| 0.000332  | -0.00016  | 8.166043 | 0.84661  | -0.53221 | 0.035441 | 0.339374 | Less than 1 | 1  |
| -0.00014  | -2.45E-05 | 8.419302 | -0.99468 | -0.10297 | 0.006977 | 0.395521 | Over 10 ye  | 6  |
| -0.00064  | -0.00037  | 8.810884 | 0.159075 | -0.98727 | 0.017465 | 0.406714 | 2 to 5 year | 8  |
| 0.002679  | 0.000302  | 7.512269 | 0.558958 | -0.8292  | 0.002882 | 0.388022 | 2 to 5 year | 8  |
| -0.0004   | 0.000957  | 6.641533 | 0.442236 | 0.896899 | 0.005228 | 0.388217 | 2 to 5 year | 20 |
| 0.000193  | 0.000456  | 7.759312 | 0.949024 | 0.315205 | 0.001225 | 0.387706 | Over 10 ye  | 2  |
| -0.00041  | -0.00111  | 11.81479 | -0.34196 | -0.93972 | 0.02326  | 0.372225 | 5 to 10 ya  | 8  |
| -0.00041  | -0.00111  | 11.81479 | -0.34196 | -0.93972 | 0.02326  | 0.372225 | 5 to 10 ya  | 8  |
| 0.002679  | 0.000302  | 7.512269 | 0.558958 | -0.8292  | 0.002882 | 0.388022 | 2 to 5 year | 8  |
| 0.000181  | 0.001625  | 6.488424 | -0.71545 | -0.69866 | 0.008097 | 0.387316 | 1 to 2 year | 9  |
| -0.00266  | -0.00119  | 7.505739 | 0.449955 | -0.89305 | 0.019117 | 0.376947 | 2 to 5 year | 3  |
| -0.00133  | 5.61E-05  | 8.335838 | -0.93209 | -0.36222 | 0.036897 | 0.350057 | 5 to 10 ya  | 12 |
| -0.00062  | 0.002157  | 6.203242 | 0.859966 | 0.510351 | 0.005228 | 0.388217 | 2 to 5 year | 25 |
| 0.000693  | 0.000295  | 7.874253 | -0.26448 | 0.964392 | 0.029475 | 0.379598 | 1 to 2 year | 1  |
| 0.004048  | 7.36E-05  | 5.468233 | -0.63031 | 0.776346 | 0.088383 | 0.284658 | 1 to 2 year | 2  |
| 0.000122  | 0.000508  | 6.87462  | -0.92133 | 0.38879  | 0.004402 | 0.396521 | 2 to 5 year | 2  |
| -0.00131  | -0.00066  | 7.994784 | -0.99629 | 0.086062 | 0.063094 | 0.314198 | Less than 1 | 2  |
| 5.80E-07  | -0.00012  | 10.36644 | 0.996778 | -0.08021 | 0.002177 | 0.390538 | Over 10 ye  | 7  |
| 0.000181  | 0.001625  | 6.488424 | -0.71545 | -0.69866 | 0.008097 | 0.387316 | 1 to 2 year | 9  |
| -0.00138  | -0.00091  | 7.085806 | -0.68539 | -0.72818 | 0.000877 | 0.41725  | 1 to 2 year | 2  |
| -0.00069  | -0.00114  | 8.010088 | 0.5936   | -0.80476 | 0.003718 | 0.39511  | Over 10 ye  | 15 |
| 0.001051  | 0.00104   | 6.225508 | 0.022104 | 0.999756 | 0.005495 | 0.401035 | 2 to 5 year | 2  |
| -0.00014  | -2.45E-05 | 8.419302 | -0.99468 | -0.10297 | 0.006977 | 0.395521 | Over 10 ye  | 6  |
| -0.0004   | 0.000957  | 6.641533 | 0.442236 | 0.896899 | 0.005228 | 0.388217 | 2 to 5 year | 20 |
| -0.00131  | -0.00066  | 7.994784 | -0.99629 | 0.086062 | 0.063094 | 0.314198 | Less than 1 | 2  |
| 0.001139  | 0.000826  | 8.643519 | 0.917286 | 0.398228 | 3.06E-05 | 0.404539 | 2 to 5 year | 10 |
| -0.00064  | -0.00037  | 8.810884 | 0.159075 | -0.98727 | 0.017465 | 0.406714 | 2 to 5 year | 8  |
| -0.00062  | 0.002157  | 6.203242 | 0.859966 | 0.510351 | 0.005228 | 0.388217 | 2 to 5 year | 25 |
| -0.00091  | 0.000146  | 11.52142 | 0.881388 | -0.47239 | 0.021245 | 0.375289 | 5 to 10 ya  | 12 |
| 0.002881  | 0.000422  | 5.561703 | 0.998678 | 0.051401 | 0.000468 | 0.416233 | 5 to 10 ya  | 8  |
| 0.001387  | 0.002705  | 5.654704 | 0.266069 | -0.96395 | 0.017398 | 0.354443 | Less than 1 | 2  |
| -3.60E-05 | -8.79E-05 | 8.242848 | -0.22782 | 0.973704 | 0.0006   | 0.432857 | 2 to 5 year | 5  |
| -0.00091  | 0.000146  | 11.52142 | 0.881388 | -0.47239 | 0.021245 | 0.375289 | 5 to 10 ya  | 12 |
| -0.00011  | 0.000304  | 7.088681 | -0.39936 | 0.916795 | 6.15E-05 | 0.413402 | 5 to 10 ya  | 4  |
| 0.000181  | 0.001625  | 6.488424 | -0.71545 | -0.69866 | 0.008097 | 0.387316 | 1 to 2 year | 9  |
| -0.00133  | 5.61E-05  | 8.335838 | -0.93209 | -0.36222 | 0.036897 | 0.350057 | 5 to 10 ya  | 12 |
| -0.0004   | 0.000957  | 6.641533 | 0.442236 | 0.896899 | 0.005228 | 0.388217 | 2 to 5 year | 20 |
| -0.00037  | 0.001131  | 7.66582  | -0.27043 | 0.962741 | 0.010208 | 0.415073 | 5 to 10 ya  | 5  |
| 0.000212  | -0.00112  | 11.00994 | -0.21897 | -0.97573 | 0.004866 | 0.386107 | 5 to 10 ya  | 1  |
| 0.001139  | 0.000826  | 8.643519 | 0.917286 | 0.398228 | 3.06E-05 | 0.404539 | 2 to 5 year | 10 |
| -3.60E-05 | -8.79E-05 | 8.242848 | -0.22782 | 0.973704 | 0.0006   | 0.432857 | 2 to 5 year | 5  |
| -0.0002   | 0.001013  | 6.953256 | 0.983781 | 0.179375 | 0.002878 | 0.393284 | 5 to 10 ya  | 15 |
| -0.00062  | 0.002157  | 6.203242 | 0.859966 | 0.510351 | 0.005228 | 0.388217 | 2 to 5 year | 25 |
| 0.000181  | -0.00068  | 9.671714 | -0.74085 | 0.67167  | 0.002675 | 0.401647 | 1 to 2 year | 2  |
| 0.00045   | 0.001567  | 6.19803  | 0.377834 | -0.92587 | 0.001788 | 0.397825 | Over 10 ye  | 11 |
| 0.000253  | 2.23E-05  | 9.858754 | 0.137937 | -0.99044 | 0.003718 | 0.399419 | 2 to 5 year | 16 |
| -0.00124  | 0.000302  | 9.16566  | -0.97215 | -0.23437 | 0.075947 | 0.300423 | 2 to 5 year | 7  |

Table S2 - Anonymized database

|           |           |          |          |          |          |          |             |    |
|-----------|-----------|----------|----------|----------|----------|----------|-------------|----|
| -0.00266  | -0.00119  | 7.505739 | 0.449955 | -0.89305 | 0.019117 | 0.376947 | 2 to 5 year | 3  |
| 0.001387  | 0.002705  | 5.654704 | 0.266069 | -0.96395 | 0.017398 | 0.354443 | Less than 1 | 2  |
| -0.00062  | 0.002157  | 6.203242 | 0.859966 | 0.510351 | 0.005228 | 0.388217 | 2 to 5 year | 25 |
| 0.00045   | 0.001567  | 6.19803  | 0.377834 | -0.92587 | 0.001788 | 0.397825 | Over 10 ye  | 11 |
| -0.00133  | 5.61E-05  | 8.335838 | -0.93209 | -0.36222 | 0.036897 | 0.350057 | 5 to 10 ya  | 12 |
| 5.87E-05  | -0.00011  | 9.120533 | -0.22296 | 0.974829 | 0.037514 | 0.339528 | 2 to 5 year | 3  |
| 0.000253  | 2.23E-05  | 9.858754 | 0.137937 | -0.99044 | 0.003718 | 0.399419 | 2 to 5 year | 16 |
| -0.00062  | 0.002157  | 6.203242 | 0.859966 | 0.510351 | 0.005228 | 0.388217 | 2 to 5 year | 25 |
| -0.00062  | 0.002157  | 6.203242 | 0.859966 | 0.510351 | 0.005228 | 0.388217 | 2 to 5 year | 25 |
| 0.002881  | 0.000422  | 5.561703 | 0.998678 | 0.051401 | 0.000468 | 0.416233 | 5 to 10 ya  | 8  |
| -0.00064  | -0.00037  | 8.810884 | 0.159075 | -0.98727 | 0.017465 | 0.406714 | 2 to 5 year | 8  |
| 0.000253  | 2.23E-05  | 9.858754 | 0.137937 | -0.99044 | 0.003718 | 0.399419 | 2 to 5 year | 16 |
| -0.00019  | 0.000372  | 7.982374 | 0.981559 | 0.191161 | 0.011815 | 0.379323 | 5 to 10 ya  | 5  |
| 0.001139  | 0.000826  | 8.643519 | 0.917286 | 0.398228 | 3.06E-05 | 0.404539 | 2 to 5 year | 10 |
| -0.00064  | -0.00037  | 8.810884 | 0.159075 | -0.98727 | 0.017465 | 0.406714 | 2 to 5 year | 8  |
| 0.002881  | 0.000422  | 5.561703 | 0.998678 | 0.051401 | 0.000468 | 0.416233 | 5 to 10 ya  | 8  |
| -0.00019  | 0.000372  | 7.982374 | 0.981559 | 0.191161 | 0.011815 | 0.379323 | 5 to 10 ya  | 5  |
| 0.002881  | 0.000422  | 5.561703 | 0.998678 | 0.051401 | 0.000468 | 0.416233 | 5 to 10 ya  | 8  |
| -0.00062  | 0.002157  | 6.203242 | 0.859966 | 0.510351 | 0.005228 | 0.388217 | 2 to 5 year | 25 |
| -0.0002   | 0.001013  | 6.953256 | 0.983781 | 0.179375 | 0.002878 | 0.393284 | 5 to 10 ya  | 15 |
| -0.0004   | 0.000957  | 6.641533 | 0.442236 | 0.896899 | 0.005228 | 0.388217 | 2 to 5 year | 20 |
| 0.000253  | 2.23E-05  | 9.858754 | 0.137937 | -0.99044 | 0.003718 | 0.399419 | 2 to 5 year | 16 |
| -0.00124  | 0.000302  | 9.16566  | -0.97215 | -0.23437 | 0.075947 | 0.300423 | 2 to 5 year | 7  |
| 0.001139  | 0.000826  | 8.643519 | 0.917286 | 0.398228 | 3.06E-05 | 0.404539 | 2 to 5 year | 10 |
| -0.0004   | 0.000957  | 6.641533 | 0.442236 | 0.896899 | 0.005228 | 0.388217 | 2 to 5 year | 20 |
| -0.00037  | 0.001131  | 7.66582  | -0.27043 | 0.962741 | 0.010208 | 0.415073 | 5 to 10 ya  | 5  |
| 9.08E-05  | 0.00013   | 7.812431 | 0.274433 | 0.961606 | 0.093409 | 0.287989 | 2 to 5 year | 3  |
| -3.60E-05 | -8.79E-05 | 8.242848 | -0.22782 | 0.973704 | 0.0006   | 0.432857 | 2 to 5 year | 5  |
| 0.000253  | 2.23E-05  | 9.858754 | 0.137937 | -0.99044 | 0.003718 | 0.399419 | 2 to 5 year | 16 |
| 0.000253  | 2.23E-05  | 9.858754 | 0.137937 | -0.99044 | 0.003718 | 0.399419 | 2 to 5 year | 16 |
| -0.00124  | 0.000302  | 9.16566  | -0.97215 | -0.23437 | 0.075947 | 0.300423 | 2 to 5 year | 7  |
| -0.00091  | 0.000146  | 11.52142 | 0.881388 | -0.47239 | 0.021245 | 0.375289 | 5 to 10 ya  | 12 |
| -0.00099  | -0.00155  | 15.27797 | -0.98557 | 0.169284 | 0.000484 | 0.429518 | Over 10 ye  | 4  |
| 0.000181  | -0.00068  | 9.671714 | -0.74085 | 0.67167  | 0.002675 | 0.401647 | 1 to 2 year | 2  |
| 0.000253  | 2.23E-05  | 9.858754 | 0.137937 | -0.99044 | 0.003718 | 0.399419 | 2 to 5 year | 16 |
| 0.000193  | 0.000456  | 7.759312 | 0.949024 | 0.315205 | 0.001225 | 0.387706 | Over 10 ye  | 2  |
| 0.00074   | -2.47E-05 | 7.907915 | 0.246254 | 0.969205 | 0.000527 | 0.425985 | 1 to 2 year | 1  |
| -0.0002   | 0.001013  | 6.953256 | 0.983781 | 0.179375 | 0.002878 | 0.393284 | 5 to 10 ya  | 15 |
| 0.00092   | 0.000939  | 6.476176 | -0.28295 | -0.95913 | 0.000145 | 0.407446 | 1 to 2 year | 1  |
| -0.00091  | 0.000146  | 11.52142 | 0.881388 | -0.47239 | 0.021245 | 0.375289 | 5 to 10 ya  | 12 |
| 0.000253  | 2.23E-05  | 9.858754 | 0.137937 | -0.99044 | 0.003718 | 0.399419 | 2 to 5 year | 16 |
| -8.50E-05 | 0.000397  | 7.945985 | 0.140679 | 0.990055 | 0.033448 | 0.351633 | 5 to 10 ya  | 7  |
| 0.002881  | 0.000422  | 5.561703 | 0.998678 | 0.051401 | 0.000468 | 0.416233 | 5 to 10 ya  | 8  |
| -0.00091  | 0.000146  | 11.52142 | 0.881388 | -0.47239 | 0.021245 | 0.375289 | 5 to 10 ya  | 12 |
| -0.00069  | -0.00114  | 8.010088 | 0.5936   | -0.80476 | 0.003718 | 0.39511  | Over 10 ye  | 15 |
| -8.50E-05 | 0.000397  | 7.945985 | 0.140679 | 0.990055 | 0.033448 | 0.351633 | 5 to 10 ya  | 7  |
| 0.000718  | -1.35E-05 | 7.385127 | -0.73872 | 0.67401  | 0.005736 | 0.423036 | 2 to 5 year | 3  |
| -0.00133  | 5.61E-05  | 8.335838 | -0.93209 | -0.36222 | 0.036897 | 0.350057 | 5 to 10 ya  | 12 |
| -0.00064  | -0.00037  | 8.810884 | 0.159075 | -0.98727 | 0.017465 | 0.406714 | 2 to 5 year | 8  |
| 0.002679  | 0.000302  | 7.512269 | 0.558958 | -0.8292  | 0.002882 | 0.388022 | 2 to 5 year | 8  |

Table S2 - Anonymized database

|           |           |          |          |          |          |          |              |    |
|-----------|-----------|----------|----------|----------|----------|----------|--------------|----|
| 0.000718  | -1.35E-05 | 7.385127 | -0.73872 | 0.67401  | 0.005736 | 0.423036 | 2 to 5 year  | 3  |
| -0.00124  | 0.000302  | 9.16566  | -0.97215 | -0.23437 | 0.075947 | 0.300423 | 2 to 5 year  | 7  |
| -3.60E-05 | -8.79E-05 | 8.242848 | -0.22782 | 0.973704 | 0.0006   | 0.432857 | 2 to 5 year  | 5  |
| -0.0002   | 0.001013  | 6.953256 | 0.983781 | 0.179375 | 0.002878 | 0.393284 | 5 to 10 year | 15 |
| -0.00062  | 0.002157  | 6.203242 | 0.859966 | 0.510351 | 0.005228 | 0.388217 | 2 to 5 year  | 25 |
| -0.00062  | 0.002157  | 6.203242 | 0.859966 | 0.510351 | 0.005228 | 0.388217 | 2 to 5 year  | 25 |
| -0.00142  | 0.000344  | 7.128039 | 0.597078 | -0.80218 | 0.047731 | 0.353481 | 2 to 5 year  | 4  |
| -0.00091  | 0.000146  | 11.52142 | 0.881388 | -0.47239 | 0.021245 | 0.375289 | 5 to 10 year | 12 |
| 0.00045   | 0.001567  | 6.19803  | 0.377834 | -0.92587 | 0.001788 | 0.397825 | Over 10 year | 11 |
| 5.80E-07  | -0.00012  | 10.36644 | 0.996778 | -0.08021 | 0.002177 | 0.390538 | Over 10 year | 7  |
| 9.37E-05  | -0.00029  | 9.465427 | -0.75018 | 0.661232 | 0.007897 | 0.414037 | 2 to 5 year  | 1  |
| -0.0004   | 0.000957  | 6.641533 | 0.442236 | 0.896899 | 0.005228 | 0.388217 | 2 to 5 year  | 20 |
| 5.80E-07  | -0.00012  | 10.36644 | 0.996778 | -0.08021 | 0.002177 | 0.390538 | Over 10 year | 7  |
| -0.00069  | -0.00114  | 8.010088 | 0.5936   | -0.80476 | 0.003718 | 0.39511  | Over 10 year | 15 |
| 5.80E-07  | -0.00012  | 10.36644 | 0.996778 | -0.08021 | 0.002177 | 0.390538 | Over 10 year | 7  |
| -0.00133  | 5.61E-05  | 8.335838 | -0.93209 | -0.36222 | 0.036897 | 0.350057 | 5 to 10 year | 12 |
| 9.08E-05  | 0.00013   | 7.812431 | 0.274433 | 0.961606 | 0.093409 | 0.287989 | 2 to 5 year  | 3  |
| -8.50E-05 | 0.000397  | 7.945985 | 0.140679 | 0.990055 | 0.033448 | 0.351633 | 5 to 10 year | 7  |
| -0.00069  | -0.00114  | 8.010088 | 0.5936   | -0.80476 | 0.003718 | 0.39511  | Over 10 year | 15 |
| -0.00041  | -0.00111  | 11.81479 | -0.34196 | -0.93972 | 0.02326  | 0.372225 | 5 to 10 year | 8  |
| -0.00014  | -2.45E-05 | 8.419302 | -0.99468 | -0.10297 | 0.006977 | 0.395521 | Over 10 year | 6  |
| -0.0004   | 0.000957  | 6.641533 | 0.442236 | 0.896899 | 0.005228 | 0.388217 | 2 to 5 year  | 20 |
| -0.0002   | 0.001013  | 6.953256 | 0.983781 | 0.179375 | 0.002878 | 0.393284 | 5 to 10 year | 15 |
| -8.50E-05 | 0.000397  | 7.945985 | 0.140679 | 0.990055 | 0.033448 | 0.351633 | 5 to 10 year | 7  |
| -0.00037  | 0.001131  | 7.66582  | -0.27043 | 0.962741 | 0.010208 | 0.415073 | 5 to 10 year | 5  |
| -0.00069  | -0.00114  | 8.010088 | 0.5936   | -0.80476 | 0.003718 | 0.39511  | Over 10 year | 15 |
| 0.00045   | 0.001567  | 6.19803  | 0.377834 | -0.92587 | 0.001788 | 0.397825 | Over 10 year | 11 |
| -3.39E-05 | 0.000811  | 7.181637 | 0.934402 | -0.35622 | 6.14E-05 | 0.420754 | 1 to 2 year  | 2  |
| 0.000253  | 2.23E-05  | 9.858754 | 0.137937 | -0.99044 | 0.003718 | 0.399419 | 2 to 5 year  | 16 |
| 0.000181  | 0.001625  | 6.488424 | -0.71545 | -0.69866 | 0.008097 | 0.387316 | 1 to 2 year  | 9  |
| -0.0004   | 0.000957  | 6.641533 | 0.442236 | 0.896899 | 0.005228 | 0.388217 | 2 to 5 year  | 20 |
| -0.00037  | 0.001131  | 7.66582  | -0.27043 | 0.962741 | 0.010208 | 0.415073 | 5 to 10 year | 5  |
| -0.00062  | 0.002157  | 6.203242 | 0.859966 | 0.510351 | 0.005228 | 0.388217 | 2 to 5 year  | 25 |
| 0.001139  | 0.000826  | 8.643519 | 0.917286 | 0.398228 | 3.06E-05 | 0.404539 | 2 to 5 year  | 10 |
| -0.00124  | 0.000302  | 9.16566  | -0.97215 | -0.23437 | 0.075947 | 0.300423 | 2 to 5 year  | 7  |
| -0.00091  | 0.000146  | 11.52142 | 0.881388 | -0.47239 | 0.021245 | 0.375289 | 5 to 10 year | 12 |
| -0.00062  | 0.002157  | 6.203242 | 0.859966 | 0.510351 | 0.005228 | 0.388217 | 2 to 5 year  | 25 |
| 0.00095   | -0.00083  | 6.641782 | 0.979936 | -0.19931 | 0.052453 | 0.331113 | 2 to 5 year  | 1  |
| -0.00041  | -0.00111  | 11.81479 | -0.34196 | -0.93972 | 0.02326  | 0.372225 | 5 to 10 year | 8  |
| -0.00024  | -0.00318  | 12.51608 | -0.20785 | 0.978162 | 0.000148 | 0.401935 | Over 10 year | 5  |
| -0.00014  | -2.45E-05 | 8.419302 | -0.99468 | -0.10297 | 0.006977 | 0.395521 | Over 10 year | 6  |
| 0.00045   | 0.001567  | 6.19803  | 0.377834 | -0.92587 | 0.001788 | 0.397825 | Over 10 year | 11 |
| 6.76E-05  | 0.000252  | 8.373786 | -0.47368 | 0.880697 | 0.067381 | 0.314345 | 2 to 5 year  | 3  |
| -0.0004   | 0.000957  | 6.641533 | 0.442236 | 0.896899 | 0.005228 | 0.388217 | 2 to 5 year  | 20 |
| -0.00069  | -0.00114  | 8.010088 | 0.5936   | -0.80476 | 0.003718 | 0.39511  | Over 10 year | 15 |
| -0.00142  | 0.000344  | 7.128039 | 0.597078 | -0.80218 | 0.047731 | 0.353481 | 2 to 5 year  | 4  |
| 0.002881  | 0.000422  | 5.561703 | 0.998678 | 0.051401 | 0.000468 | 0.416233 | 5 to 10 year | 8  |
| -0.00024  | -0.00318  | 12.51608 | -0.20785 | 0.978162 | 0.000148 | 0.401935 | Over 10 year | 5  |
| 0.000253  | 2.23E-05  | 9.858754 | 0.137937 | -0.99044 | 0.003718 | 0.399419 | 2 to 5 year  | 16 |
| -0.00064  | -0.00037  | 8.810884 | 0.159075 | -0.98727 | 0.017465 | 0.406714 | 2 to 5 year  | 8  |

Table S2 - Anonymized database

|           |           |          |          |          |          |          |             |    |
|-----------|-----------|----------|----------|----------|----------|----------|-------------|----|
| -0.00142  | 0.000344  | 7.128039 | 0.597078 | -0.80218 | 0.047731 | 0.353481 | 2 to 5 year | 4  |
| 0.000718  | -1.35E-05 | 7.385127 | -0.73872 | 0.67401  | 0.005736 | 0.423036 | 2 to 5 year | 3  |
| -0.00069  | -0.00114  | 8.010088 | 0.5936   | -0.80476 | 0.003718 | 0.39511  | Over 10 ye  | 15 |
| -0.00062  | 0.002157  | 6.203242 | 0.859966 | 0.510351 | 0.005228 | 0.388217 | 2 to 5 year | 25 |
| 0.000181  | 0.001625  | 6.488424 | -0.71545 | -0.69866 | 0.008097 | 0.387316 | 1 to 2 year | 9  |
| -0.00014  | -2.45E-05 | 8.419302 | -0.99468 | -0.10297 | 0.006977 | 0.395521 | Over 10 ye  | 6  |
| -0.00039  | 0.000536  | 7.561653 | 0.939061 | -0.34375 | 0.017287 | 0.36359  | 2 to 5 year | 1  |
| -0.0004   | 0.000957  | 6.641533 | 0.442236 | 0.896899 | 0.005228 | 0.388217 | 2 to 5 year | 20 |
| -0.00037  | 0.001131  | 7.66582  | -0.27043 | 0.962741 | 0.010208 | 0.415073 | 5 to 10 ya  | 5  |
| -0.00062  | 0.002157  | 6.203242 | 0.859966 | 0.510351 | 0.005228 | 0.388217 | 2 to 5 year | 25 |
| -0.00124  | 0.000302  | 9.16566  | -0.97215 | -0.23437 | 0.075947 | 0.300423 | 2 to 5 year | 7  |
| -0.00041  | -0.00111  | 11.81479 | -0.34196 | -0.93972 | 0.02326  | 0.372225 | 5 to 10 ya  | 8  |
| -0.00032  | -0.00022  | 7.557192 | 0.915366 | -0.40262 | 0.00028  | 0.423083 | Over 10 ye  | 5  |
| -0.00099  | -0.00155  | 15.27797 | -0.98557 | 0.169284 | 0.000484 | 0.429518 | Over 10 ye  | 4  |
| 0.000181  | 0.001625  | 6.488424 | -0.71545 | -0.69866 | 0.008097 | 0.387316 | 1 to 2 year | 9  |
| -0.00064  | -0.00037  | 8.810884 | 0.159075 | -0.98727 | 0.017465 | 0.406714 | 2 to 5 year | 8  |
| -0.00142  | 0.000344  | 7.128039 | 0.597078 | -0.80218 | 0.047731 | 0.353481 | 2 to 5 year | 4  |
| -0.00062  | 0.002157  | 6.203242 | 0.859966 | 0.510351 | 0.005228 | 0.388217 | 2 to 5 year | 25 |
| -0.00019  | 0.000372  | 7.982374 | 0.981559 | 0.191161 | 0.011815 | 0.379323 | 5 to 10 ya  | 5  |
| 0.00045   | 0.001567  | 6.19803  | 0.377834 | -0.92587 | 0.001788 | 0.397825 | Over 10 ye  | 11 |
| -0.00019  | 0.000372  | 7.982374 | 0.981559 | 0.191161 | 0.011815 | 0.379323 | 5 to 10 ya  | 5  |
| -0.00011  | 0.000304  | 7.088681 | -0.39936 | 0.916795 | 6.15E-05 | 0.413402 | 5 to 10 ya  | 4  |
| -0.00091  | 0.000146  | 11.52142 | 0.881388 | -0.47239 | 0.021245 | 0.375289 | 5 to 10 ya  | 12 |
| -3.39E-05 | 0.000811  | 7.181637 | 0.934402 | -0.35622 | 6.14E-05 | 0.420754 | 1 to 2 year | 2  |
| 0.002881  | 0.000422  | 5.561703 | 0.998678 | 0.051401 | 0.000468 | 0.416233 | 5 to 10 ya  | 8  |
| -0.00138  | -0.00091  | 7.085806 | -0.68539 | -0.72818 | 0.000877 | 0.41725  | 1 to 2 year | 2  |
| 0.000181  | 0.001625  | 6.488424 | -0.71545 | -0.69866 | 0.008097 | 0.387316 | 1 to 2 year | 9  |
| 0.001139  | 0.000826  | 8.643519 | 0.917286 | 0.398228 | 3.06E-05 | 0.404539 | 2 to 5 year | 10 |
| 0.004048  | 7.36E-05  | 5.468233 | -0.63031 | 0.776346 | 0.088383 | 0.284658 | 1 to 2 year | 2  |
| -0.0004   | 0.000957  | 6.641533 | 0.442236 | 0.896899 | 0.005228 | 0.388217 | 2 to 5 year | 20 |
| 0.00045   | 0.001567  | 6.19803  | 0.377834 | -0.92587 | 0.001788 | 0.397825 | Over 10 ye  | 11 |
| -0.00014  | -2.45E-05 | 8.419302 | -0.99468 | -0.10297 | 0.006977 | 0.395521 | Over 10 ye  | 6  |
| 0.000137  | -0.00059  | 9.942574 | 0.071324 | 0.997453 | 0.021988 | 0.380222 | 5 to 10 ya  | 2  |
| 6.76E-05  | 0.000252  | 8.373786 | -0.47368 | 0.880697 | 0.067381 | 0.314345 | 2 to 5 year | 3  |
| -0.00091  | 0.000146  | 11.52142 | 0.881388 | -0.47239 | 0.021245 | 0.375289 | 5 to 10 ya  | 12 |
| -0.00041  | -0.00111  | 11.81479 | -0.34196 | -0.93972 | 0.02326  | 0.372225 | 5 to 10 ya  | 8  |
| -0.0002   | 0.001013  | 6.953256 | 0.983781 | 0.179375 | 0.002878 | 0.393284 | 5 to 10 ya  | 15 |
| 0.002836  | -0.00084  | 7.157466 | -0.5676  | -0.8233  | 0.001367 | 0.396477 | Over 10 ye  | 2  |
| -0.0002   | 0.001013  | 6.953256 | 0.983781 | 0.179375 | 0.002878 | 0.393284 | 5 to 10 ya  | 15 |
| 0.000961  | 0.000191  | 7.336547 | 0.876566 | 0.481282 | 0.011134 | 0.405673 | 1 to 2 year | 1  |
| -0.0004   | 0.000957  | 6.641533 | 0.442236 | 0.896899 | 0.005228 | 0.388217 | 5 to 10 ya  | 26 |
| -0.00048  | 0.00019   | 9.078908 | 0.467368 | -0.88406 | 0.00014  | 0.39744  | 2 to 5 year | 3  |
| 0.001339  | -0.00023  | 7.543291 | 0.125484 | 0.992096 | 0.005514 | 0.398555 | 5 to 10 ya  | 15 |
| 0.000891  | 0.00392   | 5.304569 | 0.842642 | 0.538474 | 4.06E-05 | 0.399017 | 2 to 5 year | 9  |
| -0.0004   | 0.000669  | 7.70624  | -0.99708 | 0.076361 | 0.019945 | 0.383244 | 2 to 5 year | 6  |
| -0.00037  | 8.18E-05  | 9.069148 | -0.38439 | -0.92317 | 0.000216 | 0.430965 | 1 to 2 year | 2  |
| 0.002697  | 0.002325  | 5.800778 | 0.905334 | -0.4247  | 0.001936 | 0.399948 | Over 10 ye  | 17 |
| -0.0004   | 0.000957  | 6.641533 | 0.442236 | 0.896899 | 0.005228 | 0.388217 | 5 to 10 ya  | 26 |
| -0.00013  | 2.74E-05  | 7.615221 | -0.22678 | 0.973947 | 0.015185 | 0.373612 | 5 to 10 ya  | 7  |
| -0.0004   | 0.000957  | 6.641533 | 0.442236 | 0.896899 | 0.005228 | 0.388217 | 5 to 10 ya  | 26 |



Table S2 - Anonymized database

|           |           |          |          |          |          |          |              |    |
|-----------|-----------|----------|----------|----------|----------|----------|--------------|----|
| -0.00064  | -0.00037  | 8.810884 | 0.159075 | -0.98727 | 0.017465 | 0.406714 | 5 to 10 year | 8  |
| -0.00068  | 2.72E-05  | 8.409824 | 0.47124  | 0.882005 | 0.039537 | 0.326279 | 2 to 5 year  | 14 |
| 0.001339  | -0.00023  | 7.543291 | 0.125484 | 0.992096 | 0.005514 | 0.398555 | 5 to 10 year | 15 |
| 0.002697  | 0.002325  | 5.800778 | 0.905334 | -0.4247  | 0.001936 | 0.399948 | Over 10 ye   | 17 |
| -0.00052  | -0.00071  | 8.980148 | 0.447706 | 0.894181 | 0.08958  | 0.278293 | Over 10 ye   | 28 |
| 0.002697  | 0.002325  | 5.800778 | 0.905334 | -0.4247  | 0.001936 | 0.399948 | Over 10 ye   | 17 |
| -0.00068  | 2.72E-05  | 8.409824 | 0.47124  | 0.882005 | 0.039537 | 0.326279 | 2 to 5 year  | 14 |
| -0.00111  | -0.00027  | 10.13836 | 0.715309 | -0.69881 | 0.036897 | 0.350057 | Over 10 ye   | 10 |
| 0.000443  | 0.00158   | 6.237093 | -0.99049 | 0.137557 | 0.001588 | 0.360391 | Over 10 ye   | 31 |
| -0.0004   | 0.000957  | 6.641533 | 0.442236 | 0.896899 | 0.005228 | 0.388217 | 5 to 10 year | 26 |
| 0.000722  | -0.00228  | 10.3242  | -0.90898 | -0.41683 | 0.002737 | 0.389425 | Less than 1  | 3  |
| 0.000443  | 0.00158   | 6.237093 | -0.99049 | 0.137557 | 0.001588 | 0.360391 | Over 10 ye   | 31 |
| 0.002697  | 0.002325  | 5.800778 | 0.905334 | -0.4247  | 0.001936 | 0.399948 | Over 10 ye   | 17 |
| -0.00048  | 0.00019   | 9.078908 | 0.467368 | -0.88406 | 0.00014  | 0.39744  | 2 to 5 year  | 3  |
| 0.002443  | 0.009064  | 4.495414 | -0.72388 | -0.68993 | 0.023465 | 0.383007 | 1 to 2 year  | 1  |
| -0.00068  | 2.72E-05  | 8.409824 | 0.47124  | 0.882005 | 0.039537 | 0.326279 | 2 to 5 year  | 14 |
| -0.00052  | -0.00071  | 8.980148 | 0.447706 | 0.894181 | 0.08958  | 0.278293 | Over 10 ye   | 28 |
| 0.000443  | 0.00158   | 6.237093 | -0.99049 | 0.137557 | 0.001588 | 0.360391 | Over 10 ye   | 31 |
| 0.000443  | 0.00158   | 6.237093 | -0.99049 | 0.137557 | 0.001588 | 0.360391 | Over 10 ye   | 31 |
| 0.000135  | -0.00132  | 8.828544 | 0.684457 | -0.72905 | 0.043763 | 0.373741 | 2 to 5 year  | 19 |
| -0.00158  | -0.00072  | 6.94064  | -0.32886 | 0.94438  | 0.024372 | 0.374732 | Less than 1  | 2  |
| 0.001036  | -4.26E-06 | 6.939217 | 0.941752 | 0.336307 | 0.001393 | 0.393455 | 5 to 10 year | 7  |
| 0.000406  | 0.00014   | 7.523566 | 0.726085 | -0.6876  | 0.034812 | 0.339728 | 2 to 5 year  | 6  |
| -0.001    | 0.000891  | 6.066459 | -0.95174 | 0.30692  | 0.000202 | 0.386658 | 2 to 5 year  | 2  |
| -0.00068  | 2.72E-05  | 8.409824 | 0.47124  | 0.882005 | 0.039537 | 0.326279 | 2 to 5 year  | 14 |
| 0.000244  | -9.30E-06 | 8.093132 | 0.954265 | 0.298962 | 0.021249 | 0.365716 | Less than 1  | 1  |
| -0.0004   | 0.000957  | 6.641533 | 0.442236 | 0.896899 | 0.005228 | 0.388217 | 5 to 10 year | 26 |
| -0.0017   | -0.00024  | 7.246581 | -0.94994 | -0.31242 | 0.001859 | 0.392238 | Over 10 ye   | 11 |
| -0.00395  | -0.00151  | 8.142526 | -0.16303 | -0.98662 | 0.072606 | 0.311889 | 2 to 5 year  | 1  |
| 0.000135  | -0.00132  | 8.828544 | 0.684457 | -0.72905 | 0.043763 | 0.373741 | 2 to 5 year  | 19 |
| 0.001036  | -4.26E-06 | 6.939217 | 0.941752 | 0.336307 | 0.001393 | 0.393455 | 5 to 10 year | 7  |
| 0.001339  | -0.00023  | 7.543291 | 0.125484 | 0.992096 | 0.005514 | 0.398555 | 5 to 10 year | 15 |
| -0.00052  | -0.00071  | 8.980148 | 0.447706 | 0.894181 | 0.08958  | 0.278293 | Over 10 ye   | 28 |
| -0.00068  | 2.72E-05  | 8.409824 | 0.47124  | 0.882005 | 0.039537 | 0.326279 | 2 to 5 year  | 14 |
| -0.00052  | -0.00071  | 8.980148 | 0.447706 | 0.894181 | 0.08958  | 0.278293 | Over 10 ye   | 28 |
| 0.00033   | 0.000413  | 7.68102  | 0.622847 | 0.782343 | 0.01425  | 0.411578 | Over 10 ye   | 8  |
| -8.74E-05 | 0.000909  | 7.239906 | 0.181161 | -0.98345 | 0.033777 | 0.366614 | 2 to 5 year  | 11 |
| -0.0017   | -0.00024  | 7.246581 | -0.94994 | -0.31242 | 0.001859 | 0.392238 | Over 10 ye   | 11 |
| 0.001296  | -0.00068  | 8.44785  | 0.663142 | 0.748494 | 0.009909 | 0.387572 | 2 to 5 year  | 8  |
| -0.00052  | -0.00071  | 8.980148 | 0.447706 | 0.894181 | 0.08958  | 0.278293 | Over 10 ye   | 28 |
| 0.002697  | 0.002325  | 5.800778 | 0.905334 | -0.4247  | 0.001936 | 0.399948 | Over 10 ye   | 17 |
| -0.00082  | -6.62E-05 | 7.554388 | -0.74691 | 0.664929 | 0.012798 | 0.397134 | 1 to 2 year  | 2  |
| 0.00033   | 0.000413  | 7.68102  | 0.622847 | 0.782343 | 0.01425  | 0.411578 | Over 10 ye   | 8  |
| -0.00052  | -0.00071  | 8.980148 | 0.447706 | 0.894181 | 0.08958  | 0.278293 | Over 10 ye   | 28 |
| 0.000443  | 0.00158   | 6.237093 | -0.99049 | 0.137557 | 0.001588 | 0.360391 | Over 10 ye   | 31 |
| -0.00111  | -0.00027  | 10.13836 | 0.715309 | -0.69881 | 0.036897 | 0.350057 | Over 10 ye   | 10 |
| 0.000443  | 0.00158   | 6.237093 | -0.99049 | 0.137557 | 0.001588 | 0.360391 | Over 10 ye   | 31 |
| 0.001105  | 0.000415  | 5.860742 | -0.63306 | -0.7741  | 0.000107 | 0.404435 | 5 to 10 year | 5  |
| -8.74E-05 | 0.000909  | 7.239906 | 0.181161 | -0.98345 | 0.033777 | 0.366614 | 2 to 5 year  | 11 |
| 0.001339  | -0.00023  | 7.543291 | 0.125484 | 0.992096 | 0.005514 | 0.398555 | 5 to 10 year | 15 |

Table S2 - Anonymized database

|           |           |          |          |          |          |          |              |    |
|-----------|-----------|----------|----------|----------|----------|----------|--------------|----|
| -0.00013  | 2.74E-05  | 7.615221 | -0.22678 | 0.973947 | 0.015185 | 0.373612 | 5 to 10 year | 7  |
| -0.00082  | -6.62E-05 | 7.554388 | -0.74691 | 0.664929 | 0.012798 | 0.397134 | 1 to 2 year  | 2  |
| -0.00089  | -0.00035  | 7.0788   | -0.71109 | -0.7031  | 0.003488 | 0.403009 | 2 to 5 year  | 5  |
| -0.00052  | -0.00071  | 8.980148 | 0.447706 | 0.894181 | 0.08958  | 0.278293 | Over 10 ye   | 28 |
| 0.001036  | -4.26E-06 | 6.939217 | 0.941752 | 0.336307 | 0.001393 | 0.393455 | 5 to 10 year | 7  |
| -0.00163  | 0.000282  | 6.320958 | -0.53334 | 0.845902 | 0.065325 | 0.32561  | 2 to 5 year  | 15 |
| 0.002697  | 0.002325  | 5.800778 | 0.905334 | -0.4247  | 0.001936 | 0.399948 | Over 10 ye   | 17 |
| 0.000452  | 0.000842  | 6.690324 | -0.85015 | -0.52654 | 0.032563 | 0.348585 | 1 to 2 year  | 3  |
| -0.00089  | -0.00035  | 7.0788   | -0.71109 | -0.7031  | 0.003488 | 0.403009 | 2 to 5 year  | 5  |
| 0.000443  | 0.00158   | 6.237093 | -0.99049 | 0.137557 | 0.001588 | 0.360391 | Over 10 ye   | 31 |
| -0.00068  | 2.72E-05  | 8.409824 | 0.47124  | 0.882005 | 0.039537 | 0.326279 | 2 to 5 year  | 14 |
| 0.001105  | 0.000415  | 5.860742 | -0.63306 | -0.7741  | 0.000107 | 0.404435 | 5 to 10 year | 5  |
| -0.00064  | -0.00037  | 8.810884 | 0.159075 | -0.98727 | 0.017465 | 0.406714 | 5 to 10 year | 8  |
| 0.000131  | -0.00029  | 9.292435 | -0.10971 | 0.993964 | 0.037466 | 0.339227 | Over 10 ye   | 3  |
| 0.000258  | 0.000345  | 7.474024 | 0.731652 | 0.681678 | 0.008124 | 0.414248 | Less than 1  | 1  |
| 0.001036  | -4.26E-06 | 6.939217 | 0.941752 | 0.336307 | 0.001393 | 0.393455 | 5 to 10 year | 7  |
| -0.00154  | -0.00157  | 9.944622 | -0.94558 | -0.32538 | 0.008966 | 0.390204 | 1 to 2 year  | 2  |
| 0.001036  | -4.26E-06 | 6.939217 | 0.941752 | 0.336307 | 0.001393 | 0.393455 | 5 to 10 year | 7  |
| 0.001353  | 0.000184  | 6.482762 | -0.35969 | 0.933073 | 0.020249 | 0.388149 | Over 10 ye   | 2  |
| 0.000891  | 0.00392   | 5.304569 | 0.842642 | 0.538474 | 4.06E-05 | 0.399017 | 2 to 5 year  | 9  |
| 0.000135  | -0.00132  | 8.828544 | 0.684457 | -0.72905 | 0.043763 | 0.373741 | 2 to 5 year  | 19 |
| -0.00138  | -0.00091  | 7.085806 | -0.68539 | -0.72818 | 0.000877 | 0.41725  | 1 to 2 year  | 3  |
| 0.004535  | -0.00052  | 5.5207   | 0.989703 | -0.14314 | 0.000434 | 0.426494 | 2 to 5 year  | 2  |
| 0.000452  | -0.00043  | 8.325767 | -0.38681 | -0.92216 | 0.000667 | 0.38089  | Less than 1  | 2  |
| 0.000443  | 0.00158   | 6.237093 | -0.99049 | 0.137557 | 0.001588 | 0.360391 | Over 10 ye   | 31 |
| 0.001353  | 0.000184  | 6.482762 | -0.35969 | 0.933073 | 0.020249 | 0.388149 | Over 10 ye   | 2  |
| 0.000135  | -0.00132  | 8.828544 | 0.684457 | -0.72905 | 0.043763 | 0.373741 | 2 to 5 year  | 19 |
| 0.001339  | -0.00023  | 7.543291 | 0.125484 | 0.992096 | 0.005514 | 0.398555 | 5 to 10 year | 15 |
| -0.00052  | -0.00071  | 8.980148 | 0.447706 | 0.894181 | 0.08958  | 0.278293 | Over 10 ye   | 28 |
| 0.002697  | 0.002325  | 5.800778 | 0.905334 | -0.4247  | 0.001936 | 0.399948 | Over 10 ye   | 17 |
| -0.00093  | 0.000257  | 8.140813 | 0.99914  | -0.04147 | 0.048512 | 0.34648  | 2 to 5 year  | 3  |
| -8.74E-05 | 0.000909  | 7.239906 | 0.181161 | -0.98345 | 0.033777 | 0.366614 | 2 to 5 year  | 11 |
| -0.00163  | 0.000282  | 6.320958 | -0.53334 | 0.845902 | 0.065325 | 0.32561  | 2 to 5 year  | 15 |
| -0.00066  | 0.000356  | 7.34828  | 0.48702  | -0.87339 | 0.004815 | 0.391996 | 2 to 5 year  | 5  |
| 0.00033   | 0.000413  | 7.68102  | 0.622847 | 0.782343 | 0.01425  | 0.411578 | Over 10 ye   | 8  |
| -0.00163  | 0.000282  | 6.320958 | -0.53334 | 0.845902 | 0.065325 | 0.32561  | 2 to 5 year  | 15 |
| -7.18E-05 | -1.56E-05 | 7.911486 | -0.3367  | -0.94161 | 0.000646 | 0.422779 | 5 to 10 year | 9  |
| -0.00163  | 0.000282  | 6.320958 | -0.53334 | 0.845902 | 0.065325 | 0.32561  | 2 to 5 year  | 15 |
| 0.000443  | 0.00158   | 6.237093 | -0.99049 | 0.137557 | 0.001588 | 0.360391 | Over 10 ye   | 31 |
| -0.0004   | 0.000957  | 6.641533 | 0.442236 | 0.896899 | 0.005228 | 0.388217 | 5 to 10 year | 26 |
| -0.0004   | 0.000957  | 6.641533 | 0.442236 | 0.896899 | 0.005228 | 0.388217 | 5 to 10 year | 26 |
| -0.0004   | 0.000957  | 6.641533 | 0.442236 | 0.896899 | 0.005228 | 0.388217 | 5 to 10 year | 26 |
| 0.001036  | -4.26E-06 | 6.939217 | 0.941752 | 0.336307 | 0.001393 | 0.393455 | 5 to 10 year | 7  |
| 0.001339  | -0.00023  | 7.543291 | 0.125484 | 0.992096 | 0.005514 | 0.398555 | 5 to 10 year | 15 |
| 0.000123  | 0.000242  | 9.155404 | 0.103996 | -0.99458 | 0.013909 | 0.384906 | 2 to 5 year  | 1  |
| 0.000443  | 0.00158   | 6.237093 | -0.99049 | 0.137557 | 0.001588 | 0.360391 | Over 10 ye   | 31 |
| -0.00013  | 2.74E-05  | 7.615221 | -0.22678 | 0.973947 | 0.015185 | 0.373612 | 5 to 10 year | 7  |
| -0.001    | 0.000891  | 6.066459 | -0.95174 | 0.30692  | 0.000202 | 0.386658 | 2 to 5 year  | 2  |
| 0.002697  | 0.002325  | 5.800778 | 0.905334 | -0.4247  | 0.001936 | 0.399948 | Over 10 ye   | 17 |
| -0.0017   | -0.00024  | 7.246581 | -0.94994 | -0.31242 | 0.001859 | 0.392238 | Over 10 ye   | 11 |

Table S2 - Anonymized database

|           |           |          |          |          |          |          |             |    |
|-----------|-----------|----------|----------|----------|----------|----------|-------------|----|
| 0.000443  | 0.00158   | 6.237093 | -0.99049 | 0.137557 | 0.001588 | 0.360391 | Over 10 ye  | 31 |
| 0.001339  | -0.00023  | 7.543291 | 0.125484 | 0.992096 | 0.005514 | 0.398555 | 5 to 10 ya  | 15 |
| 0.000443  | 0.00158   | 6.237093 | -0.99049 | 0.137557 | 0.001588 | 0.360391 | Over 10 ye  | 31 |
| -0.00089  | -0.00035  | 7.0788   | -0.71109 | -0.7031  | 0.003488 | 0.403009 | 2 to 5 year | 5  |
| -0.00163  | 0.000282  | 6.320958 | -0.53334 | 0.845902 | 0.065325 | 0.32561  | 2 to 5 year | 15 |
| -7.18E-05 | -1.56E-05 | 7.911486 | -0.3367  | -0.94161 | 0.000646 | 0.422779 | 5 to 10 ya  | 9  |
| 2.64E-05  | 0.000763  | 5.972576 | 0.988796 | 0.149274 | 0.012535 | 0.405665 | 1 to 2 year | 1  |
| -0.00064  | -0.00037  | 8.810884 | 0.159075 | -0.98727 | 0.017465 | 0.406714 | 5 to 10 ya  | 8  |
| -0.00064  | -0.00037  | 8.810884 | 0.159075 | -0.98727 | 0.017465 | 0.406714 | 5 to 10 ya  | 8  |
| -7.18E-05 | -1.56E-05 | 7.911486 | -0.3367  | -0.94161 | 0.000646 | 0.422779 | 5 to 10 ya  | 9  |
| -0.0004   | 0.000957  | 6.641533 | 0.442236 | 0.896899 | 0.005228 | 0.388217 | 5 to 10 ya  | 26 |
| 0.004773  | 0.002721  | 5.106052 | -0.97229 | 0.23379  | 5.76E-05 | 0.3733   | 2 to 5 year | 4  |
| -8.74E-05 | 0.000909  | 7.239906 | 0.181161 | -0.98345 | 0.033777 | 0.366614 | 2 to 5 year | 11 |
| -0.0017   | -0.00024  | 7.246581 | -0.94994 | -0.31242 | 0.001859 | 0.392238 | Over 10 ye  | 11 |
| -0.00026  | 0.000462  | 8.163028 | 0.284725 | -0.95861 | 0.024897 | 0.373615 | 1 to 2 year | 2  |
| 0.000443  | 0.00158   | 6.237093 | -0.99049 | 0.137557 | 0.001588 | 0.360391 | Over 10 ye  | 31 |
| 0.002697  | 0.002325  | 5.800778 | 0.905334 | -0.4247  | 0.001936 | 0.399948 | Over 10 ye  | 17 |
| 0.001576  | 0.000457  | 6.224496 | 0.630085 | 0.776526 | 0.044078 | 0.371762 | 1 to 2 year | 2  |
| -0.00068  | 2.72E-05  | 8.409824 | 0.47124  | 0.882005 | 0.039537 | 0.326279 | 2 to 5 year | 14 |
| 0.000135  | -0.00132  | 8.828544 | 0.684457 | -0.72905 | 0.043763 | 0.373741 | 2 to 5 year | 19 |
| -0.0004   | 0.000957  | 6.641533 | 0.442236 | 0.896899 | 0.005228 | 0.388217 | 5 to 10 ya  | 26 |
| -0.00052  | -0.00071  | 8.980148 | 0.447706 | 0.894181 | 0.08958  | 0.278293 | Over 10 ye  | 28 |
| -0.00138  | -0.00091  | 7.085806 | -0.68539 | -0.72818 | 0.000877 | 0.41725  | 1 to 2 year | 3  |
| -0.00052  | -0.00071  | 8.980148 | 0.447706 | 0.894181 | 0.08958  | 0.278293 | Over 10 ye  | 28 |
| 0.001105  | 0.000415  | 5.860742 | -0.63306 | -0.7741  | 0.000107 | 0.404435 | 5 to 10 ya  | 5  |
| -0.00111  | -0.00027  | 10.13836 | 0.715309 | -0.69881 | 0.036897 | 0.350057 | Over 10 ye  | 10 |
| 0.000443  | 0.00158   | 6.237093 | -0.99049 | 0.137557 | 0.001588 | 0.360391 | Over 10 ye  | 31 |
| 0.00033   | 0.000413  | 7.68102  | 0.622847 | 0.782343 | 0.01425  | 0.411578 | Over 10 ye  | 8  |
| -0.00052  | -0.00071  | 8.980148 | 0.447706 | 0.894181 | 0.08958  | 0.278293 | Over 10 ye  | 28 |
| -7.18E-05 | -1.56E-05 | 7.911486 | -0.3367  | -0.94161 | 0.000646 | 0.422779 | 5 to 10 ya  | 9  |
| -0.0004   | 0.000957  | 6.641533 | 0.442236 | 0.896899 | 0.005228 | 0.388217 | 5 to 10 ya  | 26 |
| -0.0004   | 0.000669  | 7.70624  | -0.99708 | 0.076361 | 0.019945 | 0.383244 | 2 to 5 year | 6  |
| -0.00052  | -0.00071  | 8.980148 | 0.447706 | 0.894181 | 0.08958  | 0.278293 | Over 10 ye  | 28 |
| 0.000443  | 0.00158   | 6.237093 | -0.99049 | 0.137557 | 0.001588 | 0.360391 | Over 10 ye  | 31 |
| 0.000443  | 0.00158   | 6.237093 | -0.99049 | 0.137557 | 0.001588 | 0.360391 | Over 10 ye  | 31 |
| -0.00066  | 0.000356  | 7.34828  | 0.48702  | -0.87339 | 0.004815 | 0.391996 | 2 to 5 year | 5  |
| 0.001036  | -4.26E-06 | 6.939217 | 0.941752 | 0.336307 | 0.001393 | 0.393455 | 5 to 10 ya  | 7  |
| 0.000443  | 0.00158   | 6.237093 | -0.99049 | 0.137557 | 0.001588 | 0.360391 | Over 10 ye  | 31 |
| 0.000393  | 0.000719  | 7.13387  | -0.98446 | -0.17562 | 0.046343 | 0.330844 | 1 to 2 year | 2  |
| -0.00052  | -0.00071  | 8.980148 | 0.447706 | 0.894181 | 0.08958  | 0.278293 | Over 10 ye  | 28 |
| -0.00032  | 0.00039   | 7.819598 | -0.16045 | 0.987043 | 0.013231 | 0.403303 | 2 to 5 year | 2  |
| 0.000135  | -0.00132  | 8.828544 | 0.684457 | -0.72905 | 0.043763 | 0.373741 | 2 to 5 year | 19 |
| 0.000135  | -0.00132  | 8.828544 | 0.684457 | -0.72905 | 0.043763 | 0.373741 | 2 to 5 year | 19 |
| 0.001339  | -0.00023  | 7.543291 | 0.125484 | 0.992096 | 0.005514 | 0.398555 | 5 to 10 ya  | 15 |
| 0.000443  | 0.00158   | 6.237093 | -0.99049 | 0.137557 | 0.001588 | 0.360391 | Over 10 ye  | 31 |
| 0.001339  | -0.00023  | 7.543291 | 0.125484 | 0.992096 | 0.005514 | 0.398555 | 5 to 10 ya  | 15 |
| -7.18E-05 | -1.56E-05 | 7.911486 | -0.3367  | -0.94161 | 0.000646 | 0.422779 | 5 to 10 ya  | 9  |
| 0.000452  | 0.000842  | 6.690324 | -0.85015 | -0.52654 | 0.032563 | 0.348585 | 1 to 2 year | 3  |
| 0.001339  | -0.00023  | 7.543291 | 0.125484 | 0.992096 | 0.005514 | 0.398555 | 5 to 10 ya  | 15 |
| 0.000443  | 0.00158   | 6.237093 | -0.99049 | 0.137557 | 0.001588 | 0.360391 | Over 10 ye  | 31 |

Table S2 - Anonymized database

|           |           |          |          |          |          |          |             |    |
|-----------|-----------|----------|----------|----------|----------|----------|-------------|----|
| -0.00052  | -0.00071  | 8.980148 | 0.447706 | 0.894181 | 0.08958  | 0.278293 | Over 10 ye  | 28 |
| -7.18E-05 | -1.56E-05 | 7.911486 | -0.3367  | -0.94161 | 0.000646 | 0.422779 | 5 to 10 ya  | 9  |
| 0.004773  | 0.002721  | 5.106052 | -0.97229 | 0.23379  | 5.76E-05 | 0.3733   | 2 to 5 year | 4  |
| -0.0017   | -0.00024  | 7.246581 | -0.94994 | -0.31242 | 0.001859 | 0.392238 | Over 10 ye  | 11 |
| -0.00052  | -0.00071  | 8.980148 | 0.447706 | 0.894181 | 0.08958  | 0.278293 | Over 10 ye  | 28 |
| -0.00052  | -0.00071  | 8.980148 | 0.447706 | 0.894181 | 0.08958  | 0.278293 | Over 10 ye  | 28 |
| 0.001296  | -0.00068  | 8.44785  | 0.663142 | 0.748494 | 0.009909 | 0.387572 | 2 to 5 year | 8  |
| -0.00089  | -0.00035  | 7.0788   | -0.71109 | -0.7031  | 0.003488 | 0.403009 | 2 to 5 year | 5  |
| -8.74E-05 | 0.000909  | 7.239906 | 0.181161 | -0.98345 | 0.033777 | 0.366614 | 2 to 5 year | 11 |
| 0.004773  | 0.002721  | 5.106052 | -0.97229 | 0.23379  | 5.76E-05 | 0.3733   | 2 to 5 year | 4  |
| -0.00163  | 0.000282  | 6.320958 | -0.53334 | 0.845902 | 0.065325 | 0.32561  | 2 to 5 year | 15 |
| 0.000135  | -0.00132  | 8.828544 | 0.684457 | -0.72905 | 0.043763 | 0.373741 | 2 to 5 year | 19 |
| -0.0024   | -0.00012  | 11.78486 | 0.988351 | -0.15219 | 0.013105 | 0.383563 | 1 to 2 year | 1  |
| 0.000891  | 0.00392   | 5.304569 | 0.842642 | 0.538474 | 4.06E-05 | 0.399017 | 2 to 5 year | 9  |
| 0.00033   | 0.000413  | 7.68102  | 0.622847 | 0.782343 | 0.01425  | 0.411578 | Over 10 ye  | 8  |
| 0.000722  | -0.00228  | 10.3242  | -0.90898 | -0.41683 | 0.002737 | 0.389425 | Less than 1 | 3  |
| 0.000406  | 0.00014   | 7.523566 | 0.726085 | -0.6876  | 0.034812 | 0.339728 | 2 to 5 year | 6  |
| -0.0004   | 0.000669  | 7.70624  | -0.99708 | 0.076361 | 0.019945 | 0.383244 | 2 to 5 year | 6  |
| -0.00052  | -0.00071  | 8.980148 | 0.447706 | 0.894181 | 0.08958  | 0.278293 | Over 10 ye  | 28 |
| -0.00547  | -0.00471  | 9.736187 | -0.29985 | -0.95399 | 0.005529 | 0.407736 | 5 to 10 ya  | 5  |
| 0.001296  | -0.00068  | 8.44785  | 0.663142 | 0.748494 | 0.009909 | 0.387572 | 2 to 5 year | 8  |
| -0.00138  | -0.00091  | 7.085806 | -0.68539 | -0.72818 | 0.000877 | 0.41725  | 1 to 2 year | 3  |
| -0.00064  | -0.00037  | 8.810884 | 0.159075 | -0.98727 | 0.017465 | 0.406714 | 5 to 10 ya  | 8  |
| -0.00052  | -0.00071  | 8.980148 | 0.447706 | 0.894181 | 0.08958  | 0.278293 | Over 10 ye  | 28 |
| -0.0004   | 0.000957  | 6.641533 | 0.442236 | 0.896899 | 0.005228 | 0.388217 | 5 to 10 ya  | 26 |
| 0.000393  | 0.000719  | 7.13387  | -0.98446 | -0.17562 | 0.046343 | 0.330844 | 1 to 2 year | 2  |
| 0.001105  | 0.000415  | 5.860742 | -0.63306 | -0.7741  | 0.000107 | 0.404435 | 5 to 10 ya  | 5  |
| -0.00163  | 0.000282  | 6.320958 | -0.53334 | 0.845902 | 0.065325 | 0.32561  | 2 to 5 year | 15 |
| 0.000135  | -0.00132  | 8.828544 | 0.684457 | -0.72905 | 0.043763 | 0.373741 | 2 to 5 year | 19 |
| 0.001296  | -0.00068  | 8.44785  | 0.663142 | 0.748494 | 0.009909 | 0.387572 | 2 to 5 year | 8  |
| 0.001296  | -0.00068  | 8.44785  | 0.663142 | 0.748494 | 0.009909 | 0.387572 | 2 to 5 year | 8  |
| -8.74E-05 | 0.000909  | 7.239906 | 0.181161 | -0.98345 | 0.033777 | 0.366614 | 2 to 5 year | 11 |
| 0.004535  | -0.00052  | 5.5207   | 0.989703 | -0.14314 | 0.000434 | 0.426494 | 2 to 5 year | 2  |
| -0.0004   | 0.000957  | 6.641533 | 0.442236 | 0.896899 | 0.005228 | 0.388217 | 5 to 10 ya  | 26 |
| 0.000406  | 0.00014   | 7.523566 | 0.726085 | -0.6876  | 0.034812 | 0.339728 | 2 to 5 year | 6  |
| 0.000443  | 0.00158   | 6.237093 | -0.99049 | 0.137557 | 0.001588 | 0.360391 | Over 10 ye  | 31 |
| 0.002697  | 0.002325  | 5.800778 | 0.905334 | -0.4247  | 0.001936 | 0.399948 | Over 10 ye  | 17 |
| -0.00068  | 2.72E-05  | 8.409824 | 0.47124  | 0.882005 | 0.039537 | 0.326279 | 2 to 5 year | 14 |
| 0.001296  | -0.00068  | 8.44785  | 0.663142 | 0.748494 | 0.009909 | 0.387572 | 2 to 5 year | 8  |
| -0.00163  | 0.000282  | 6.320958 | -0.53334 | 0.845902 | 0.065325 | 0.32561  | 2 to 5 year | 15 |
| 0.00033   | 0.000413  | 7.68102  | 0.622847 | 0.782343 | 0.01425  | 0.411578 | Over 10 ye  | 8  |
| 0.000443  | 0.00158   | 6.237093 | -0.99049 | 0.137557 | 0.001588 | 0.360391 | Over 10 ye  | 31 |
| -0.0004   | 0.000669  | 7.70624  | -0.99708 | 0.076361 | 0.019945 | 0.383244 | 2 to 5 year | 6  |
| -0.0004   | 0.000957  | 6.641533 | 0.442236 | 0.896899 | 0.005228 | 0.388217 | 5 to 10 ya  | 26 |
| -0.00111  | -0.00027  | 10.13836 | 0.715309 | -0.69881 | 0.036897 | 0.350057 | Over 10 ye  | 10 |
| 0.000443  | 0.00158   | 6.237093 | -0.99049 | 0.137557 | 0.001588 | 0.360391 | Over 10 ye  | 31 |
| -0.0004   | 0.000957  | 6.641533 | 0.442236 | 0.896899 | 0.005228 | 0.388217 | 5 to 10 ya  | 26 |
| -0.00052  | -0.00071  | 8.980148 | 0.447706 | 0.894181 | 0.08958  | 0.278293 | Over 10 ye  | 28 |
| -0.0004   | 0.000957  | 6.641533 | 0.442236 | 0.896899 | 0.005228 | 0.388217 | 5 to 10 ya  | 26 |
| -0.0004   | 0.000957  | 6.641533 | 0.442236 | 0.896899 | 0.005228 | 0.388217 | 5 to 10 ya  | 26 |

Table S2 - Anonymized database

|           |           |          |          |          |          |          |                  |    |
|-----------|-----------|----------|----------|----------|----------|----------|------------------|----|
| 0.000891  | 0.00392   | 5.304569 | 0.842642 | 0.538474 | 4.06E-05 | 0.399017 | 2 to 5 year      | 9  |
| -0.00068  | 2.72E-05  | 8.409824 | 0.47124  | 0.882005 | 0.039537 | 0.326279 | 2 to 5 year      | 14 |
| 0.001339  | -0.00023  | 7.543291 | 0.125484 | 0.992096 | 0.005514 | 0.398555 | 5 to 10 year     | 15 |
| -8.74E-05 | 0.000909  | 7.239906 | 0.181161 | -0.98345 | 0.033777 | 0.366614 | 2 to 5 year      | 11 |
| -0.00163  | 0.000282  | 6.320958 | -0.53334 | 0.845902 | 0.065325 | 0.32561  | 2 to 5 year      | 15 |
| 0.000443  | 0.00158   | 6.237093 | -0.99049 | 0.137557 | 0.001588 | 0.360391 | Over 10 year     | 31 |
| -0.00048  | 0.00019   | 9.078908 | 0.467368 | -0.88406 | 0.00014  | 0.39744  | 2 to 5 year      | 3  |
| 0.000891  | 0.00392   | 5.304569 | 0.842642 | 0.538474 | 4.06E-05 | 0.399017 | 2 to 5 year      | 9  |
| -0.00068  | 2.72E-05  | 8.409824 | 0.47124  | 0.882005 | 0.039537 | 0.326279 | 2 to 5 year      | 14 |
| 0.00022   | -0.00022  | 7.385865 | 0.999496 | 0.031747 | 0.062085 | 0.318606 | 5 to 10 year     | 1  |
| 0.000333  | 0.000143  | 7.315743 | 0.993855 | -0.11069 | 0.055491 | 0.279209 | 2 to 5 year      | 3  |
| 0.000443  | 0.00158   | 6.237093 | -0.99049 | 0.137557 | 0.001588 | 0.360391 | Over 10 year     | 31 |
| -0.0004   | 0.000957  | 6.641533 | 0.442236 | 0.896899 | 0.005228 | 0.388217 | 5 to 10 year     | 26 |
| 0.001339  | -0.00023  | 7.543291 | 0.125484 | 0.992096 | 0.005514 | 0.398555 | 5 to 10 year     | 15 |
| -0.00027  | 0.00029   | 7.187155 | 0.29133  | -0.95662 | 0.027795 | 0.37041  | Less than 1 year | 2  |
| -0.00052  | -0.00071  | 8.980148 | 0.447706 | 0.894181 | 0.08958  | 0.278293 | Over 10 year     | 28 |
| -0.00068  | 2.72E-05  | 8.409824 | 0.47124  | 0.882005 | 0.039537 | 0.326279 | 2 to 5 year      | 14 |
| -0.00052  | -0.00071  | 8.980148 | 0.447706 | 0.894181 | 0.08958  | 0.278293 | Over 10 year     | 28 |
| -0.00163  | 0.000282  | 6.320958 | -0.53334 | 0.845902 | 0.065325 | 0.32561  | 2 to 5 year      | 15 |
| -0.0004   | 0.000957  | 6.641533 | 0.442236 | 0.896899 | 0.005228 | 0.388217 | 5 to 10 year     | 26 |
| -0.0004   | 0.000957  | 6.641533 | 0.442236 | 0.896899 | 0.005228 | 0.388217 | 5 to 10 year     | 26 |
| -0.00052  | -0.00071  | 8.980148 | 0.447706 | 0.894181 | 0.08958  | 0.278293 | Over 10 year     | 28 |
| 0.000135  | -0.00132  | 8.828544 | 0.684457 | -0.72905 | 0.043763 | 0.373741 | 2 to 5 year      | 19 |
| 0.000135  | -0.00132  | 8.828544 | 0.684457 | -0.72905 | 0.043763 | 0.373741 | 2 to 5 year      | 19 |
| -0.00547  | -0.00471  | 9.736187 | -0.29985 | -0.95399 | 0.005529 | 0.407736 | 5 to 10 year     | 5  |
| 0.001296  | -0.00068  | 8.44785  | 0.663142 | 0.748494 | 0.009909 | 0.387572 | 2 to 5 year      | 8  |
| -0.00052  | -0.00071  | 8.980148 | 0.447706 | 0.894181 | 0.08958  | 0.278293 | Over 10 year     | 28 |
| -0.0017   | -0.00024  | 7.246581 | -0.94994 | -0.31242 | 0.001859 | 0.392238 | Over 10 year     | 11 |
| -0.00163  | 0.000282  | 6.320958 | -0.53334 | 0.845902 | 0.065325 | 0.32561  | 2 to 5 year      | 15 |
| -0.00111  | -0.00027  | 10.13836 | 0.715309 | -0.69881 | 0.036897 | 0.350057 | Over 10 year     | 10 |
| 0.004773  | 0.002721  | 5.106052 | -0.97229 | 0.23379  | 5.76E-05 | 0.3733   | 2 to 5 year      | 4  |
| 0.000406  | 0.00014   | 7.523566 | 0.726085 | -0.6876  | 0.034812 | 0.339728 | 2 to 5 year      | 6  |
| -0.00064  | -0.00037  | 8.810884 | 0.159075 | -0.98727 | 0.017465 | 0.406714 | 5 to 10 year     | 8  |
| 0.000891  | 0.00392   | 5.304569 | 0.842642 | 0.538474 | 4.06E-05 | 0.399017 | 2 to 5 year      | 9  |
| -0.0017   | -0.00024  | 7.246581 | -0.94994 | -0.31242 | 0.001859 | 0.392238 | Over 10 year     | 11 |
| 0.001547  | 0.000517  | 6.168585 | 0.008704 | 0.999962 | 0.001499 | 0.425114 | 5 to 10 year     | 3  |
| -0.00045  | -0.0004   | 9.139278 | -0.97586 | -0.21837 | 0.009431 | 0.390315 | 2 to 5 year      | 20 |
| 0.000872  | 0.000622  | 7.015728 | -0.62153 | -0.78339 | 0.011947 | 0.403054 | 1 to 2 year      | 2  |
| -0.00019  | 0.000252  | 9.080857 | -0.15098 | 0.988537 | 0.023393 | 0.371974 | Over 10 year     | 10 |
| 0.001131  | 0.00063   | 7.54068  | 0.908182 | -0.41858 | 0.339062 | 0.343287 | 5 to 10 year     | 5  |
| 0.000754  | 3.40E-05  | 6.545462 | 0.443489 | -0.89628 | 0.014039 | 0.374165 | Over 10 year     | 2  |
| 0.001105  | 0.000415  | 5.860742 | -0.63306 | -0.7741  | 0.000107 | 0.404435 | 5 to 10 year     | 7  |
| -0.00149  | -0.00148  | 8.976081 | -0.75992 | 0.650019 | 0.009797 | 0.373252 | 2 to 5 year      | 8  |
| -0.00023  | 0.000294  | 7.396209 | -0.85928 | 0.511503 | 0.102343 | 0.287067 | 5 to 10 year     | 13 |
| -0.00037  | 0.000636  | 6.427949 | -0.7724  | -0.63513 | 0.003948 | 0.402743 | Over 10 year     | 11 |
| -3.90E-05 | -0.00066  | 10.38832 | -0.13929 | -0.99025 | 0.046155 | 0.323061 | Over 10 year     | 15 |
| 0.002444  | -0.00025  | 6.068515 | -0.99992 | -0.01246 | 0.00288  | 0.395734 | 2 to 5 year      | 4  |
| -0.00054  | -0.00053  | 7.974645 | 0.37949  | -0.9252  | 0.003664 | 0.395188 | Over 10 year     | 16 |
| -0.002    | -0.0005   | 7.043015 | -0.99784 | -0.06576 | 0.002133 | 0.399649 | 2 to 5 year      | 6  |
| -0.00324  | -9.00E-04 | 12.5425  | -0.65231 | 0.757956 | 0.052029 | 0.311606 | 2 to 5 year      | 3  |

Table S2 - Anonymized database

|           |           |          |          |          |          |          |             |    |
|-----------|-----------|----------|----------|----------|----------|----------|-------------|----|
| 3.00E-06  | -0.00061  | 12.34398 | 0.695892 | 0.718146 | 3.18E-05 | 0.406127 | 2 to 5 year | 3  |
| -0.00069  | -0.00049  | 8.958983 | 0.132123 | -0.99123 | 0.044799 | 0.359558 | Over 10 ye  | 34 |
| 0.000585  | -9.20E-05 | 7.951361 | 0.67058  | 0.741837 | 0.039557 | 0.340828 | 2 to 5 year | 5  |
| 0.000373  | 0.000481  | 7.152483 | -0.42747 | -0.90403 | 0.016893 | 0.387055 | 2 to 5 year | 11 |
| -0.00054  | 0.000921  | 7.719733 | 0.996977 | -0.0777  | 0.024062 | 0.382715 | 5 to 10 ya  | 1  |
| -0.00181  | -3.80E-05 | 11.36418 | -0.63714 | 0.770751 | 0.001584 | 0.411519 | 5 to 10 ya  | 5  |
| 2.80E-05  | 0.000158  | 7.935713 | 0.986909 | -0.16128 | 0.01295  | 0.403363 | 5 to 10 ya  | 6  |
| 0.000928  | 0.000315  | 7.07586  | -0.01795 | -0.99984 | 0.047869 | 0.34643  | 5 to 10 ya  | 26 |
| 0.000827  | 0.000962  | 6.420393 | -0.99141 | -0.13081 | 0.001287 | 0.426577 | 1 to 2 year | 3  |
| -0.00351  | -0.00493  | 9.698227 | 0.9886   | -0.15057 | 0.05117  | 0.320754 | 5 to 10 ya  | 10 |
| 0.001535  | 0.000484  | 6.717156 | -0.14995 | -0.98869 | 0.058258 | 0.334687 | 1 to 2 year | 2  |
| 0.001039  | 0         | 7.701547 | 0.757136 | -0.65326 | 0.030647 | 0.366727 | 5 to 10 ya  | 3  |
| -0.00028  | 0.000453  | 6.854851 | 0.797983 | 0.60268  | 0.009312 | 0.395292 | 2 to 5 year | 16 |
| -0.00037  | 0.000395  | 7.243243 | -0.01524 | 0.999884 | 0.037988 | 0.325697 | 2 to 5 year | 6  |
| -0.00351  | -0.00493  | 9.698227 | 0.9886   | -0.15057 | 0.05117  | 0.320754 | 5 to 10 ya  | 10 |
| 0.002295  | 0.00551   | 4.841191 | -0.19558 | 0.980687 | 0.006205 | 0.387621 | 5 to 10 ya  | 10 |
| 0.000928  | 0.000315  | 7.07586  | -0.01795 | -0.99984 | 0.047869 | 0.34643  | 5 to 10 ya  | 26 |
| -3.90E-05 | -0.00066  | 10.38832 | -0.13929 | -0.99025 | 0.046155 | 0.323061 | Over 10 ye  | 15 |
| -0.00019  | 0.000252  | 9.080857 | -0.15098 | 0.988537 | 0.023393 | 0.371974 | Over 10 ye  | 10 |
| 0.00364   | 0.001644  | 5.660378 | -0.83004 | -0.55771 | 0.062955 | 0.326097 | 1 to 2 year | 5  |
| -0.00125  | -0.00089  | 6.507705 | 0.751696 | -0.65951 | 0.059097 | 0.317329 | 2 to 5 year | 8  |
| 0.000112  | 0.000241  | 7.972994 | 0.449417 | 0.893322 | 0.002402 | 0.419275 | 2 to 5 year | 7  |
| 0.003221  | 0.001054  | 5.788663 | 0.94556  | 0.325447 | 0.005833 | 0.395439 | 2 to 5 year | 8  |
| -3.40E-05 | -0.00087  | 9.206155 | -0.75518 | 0.65552  | 0.021835 | 0.387149 | 5 to 10 ya  | 6  |
| 3.30E-05  | 0.000103  | 7.984262 | 0.497598 | -0.86741 | 0.004843 | 0.391127 | 5 to 10 ya  | 11 |
| -0.00075  | 0.000153  | 8.199074 | 0.444781 | -0.89564 | 0.002887 | 0.393638 | 2 to 5 year | 1  |
| -0.00149  | -0.00148  | 8.976081 | -0.75992 | 0.650019 | 0.009797 | 0.373252 | 2 to 5 year | 8  |
| -1.40E-05 | 3.80E-05  | 9.22682  | 0.72213  | 0.691757 | 6.65E-07 | 0.412395 | 2 to 5 year | 3  |
| -0.00023  | 0.000294  | 7.396209 | -0.85928 | 0.511503 | 0.102343 | 0.287067 | 5 to 10 ya  | 13 |
| 0.000125  | 0.000106  | 8.09158  | -0.47147 | -0.88188 | 0.001293 | 0.395439 | 5 to 10 ya  | 12 |
| 0.000928  | 0.000315  | 7.07586  | -0.01795 | -0.99984 | 0.047869 | 0.34643  | 5 to 10 ya  | 26 |
| -0.00149  | -0.00148  | 8.976081 | -0.75992 | 0.650019 | 0.009797 | 0.373252 | 2 to 5 year | 8  |
| 0.000125  | 0.000106  | 8.09158  | -0.47147 | -0.88188 | 0.001293 | 0.395439 | 5 to 10 ya  | 12 |
| 0.000928  | 0.000315  | 7.07586  | -0.01795 | -0.99984 | 0.047869 | 0.34643  | 5 to 10 ya  | 26 |
| -3.90E-05 | -0.00066  | 10.38832 | -0.13929 | -0.99025 | 0.046155 | 0.323061 | Over 10 ye  | 15 |
| 0.002565  | 0.000252  | 7.01588  | -0.81028 | -0.58604 | 0.008547 | 0.386603 | 5 to 10 ya  | 8  |
| -0.00351  | -0.00493  | 9.698227 | 0.9886   | -0.15057 | 0.05117  | 0.320754 | 5 to 10 ya  | 10 |
| 0.000125  | 0.000106  | 8.09158  | -0.47147 | -0.88188 | 0.001293 | 0.395439 | 5 to 10 ya  | 12 |
| -0.00037  | 0.000395  | 7.243243 | -0.01524 | 0.999884 | 0.037988 | 0.325697 | 2 to 5 year | 6  |
| 0.00096   | 9.00E-05  | 6.846452 | 0.995135 | -0.09852 | 0.035441 | 0.339374 | 2 to 5 year | 5  |
| 0.0011    | -0.00039  | 9.418569 | 0.243551 | -0.96989 | 0.002535 | 0.408747 | 2 to 5 year | 6  |
| -0.00048  | -0.00042  | 8.983812 | -0.95159 | 0.307365 | 0.001385 | 0.40293  | 2 to 5 year | 5  |
| 3.30E-05  | 0.000103  | 7.984262 | 0.497598 | -0.86741 | 0.004843 | 0.391127 | 5 to 10 ya  | 11 |
| -0.00069  | -0.00049  | 8.958983 | 0.132123 | -0.99123 | 0.044799 | 0.359558 | Over 10 ye  | 34 |
| -0.00037  | 0.000636  | 6.427949 | -0.7724  | -0.63513 | 0.003948 | 0.402743 | Over 10 ye  | 11 |
| -3.90E-05 | -0.00066  | 10.38832 | -0.13929 | -0.99025 | 0.046155 | 0.323061 | Over 10 ye  | 15 |
| -0.00087  | -0.00049  | 8.240852 | 0.281379 | -0.9596  | 0.004232 | 0.388678 | 1 to 2 year | 4  |
| 0.000928  | 0.000315  | 7.07586  | -0.01795 | -0.99984 | 0.047869 | 0.34643  | 5 to 10 ya  | 26 |
| -0.00317  | -0.00758  | 8.285575 | 0.381979 | -0.92417 | 0.008867 | 0.385166 | Over 10 ye  | 17 |
| 0.000928  | 0.000315  | 7.07586  | -0.01795 | -0.99984 | 0.047869 | 0.34643  | 5 to 10 ya  | 26 |

Table S2 - Anonymized database

|          |           |          |          |          |          |          |             |    |
|----------|-----------|----------|----------|----------|----------|----------|-------------|----|
| 0.000524 | -0.00082  | 7.77387  | -0.9394  | -0.34282 | 0.019976 | 0.370704 | 2 to 5 year | 3  |
| -0.00069 | -0.00049  | 8.958983 | 0.132123 | -0.99123 | 0.044799 | 0.359558 | Over 10 ye  | 34 |
| -0.00054 | -0.00053  | 7.974645 | 0.37949  | -0.9252  | 0.003664 | 0.395188 | Over 10 ye  | 16 |
| -0.00019 | 0.000252  | 9.080857 | -0.15098 | 0.988537 | 0.023393 | 0.371974 | Over 10 ye  | 10 |
| -0.00023 | 0.000294  | 7.396209 | -0.85928 | 0.511503 | 0.102343 | 0.287067 | 5 to 10 yea | 13 |
| 0.002139 | -0.00178  | 6.95804  | -0.13969 | 0.990196 | 0.009714 | 0.385306 | 1 to 2 year | 7  |
| -0.00069 | -0.00049  | 8.958983 | 0.132123 | -0.99123 | 0.044799 | 0.359558 | Over 10 ye  | 34 |
| 0.000699 | -0.00033  | 7.434845 | -0.42134 | -0.9069  | 0.036834 | 0.356765 | 2 to 5 year | 2  |
| -0.00181 | -3.80E-05 | 11.36418 | -0.63714 | 0.770751 | 0.001584 | 0.411519 | 5 to 10 yea | 5  |
| 3.70E-05 | 0.000344  | 6.792089 | -0.99023 | 0.139451 | 0.012965 | 0.387951 | 2 to 5 year | 12 |
| 0.000242 | -4.50E-05 | 7.396961 | -0.96834 | 0.249643 | 0.024769 | 0.391333 | 1 to 2 year | 3  |
| -0.00037 | 0.000636  | 6.427949 | -0.7724  | -0.63513 | 0.003948 | 0.402743 | Over 10 ye  | 11 |
| -0.00029 | -6.10E-05 | 10.92574 | 0.009512 | -0.99995 | 0.040339 | 0.342214 | 2 to 5 year | 8  |
| -0.00043 | 0.000222  | 6.91947  | -0.59886 | -0.80085 | 0.003814 | 0.39002  | 2 to 5 year | 4  |
| 0.000928 | 0.000315  | 7.07586  | -0.01795 | -0.99984 | 0.047869 | 0.34643  | 5 to 10 yea | 26 |
| -0.00045 | -0.0004   | 9.139278 | -0.97586 | -0.21837 | 0.009431 | 0.390315 | 2 to 5 year | 20 |
| -0.00037 | 0.000636  | 6.427949 | -0.7724  | -0.63513 | 0.003948 | 0.402743 | Over 10 ye  | 11 |
| 0.002295 | 0.00551   | 4.841191 | -0.19558 | 0.980687 | 0.006205 | 0.387621 | 5 to 10 yea | 10 |
| -0.00351 | -0.00493  | 9.698227 | 0.9886   | -0.15057 | 0.05117  | 0.320754 | 5 to 10 yea | 10 |
| -0.00317 | -0.00758  | 8.285575 | 0.381979 | -0.92417 | 0.008867 | 0.385166 | Over 10 ye  | 17 |
| -0.00354 | -0.0001   | 7.882977 | 0.95887  | -0.28384 | 0.000103 | 0.423653 | 1 to 2 year | 12 |
| -0.00013 | 0.000117  | 9.363936 | -0.85537 | -0.51802 | 0.068087 | 0.336834 | 2 to 5 year | 5  |
| -0.00018 | 0.000166  | 9.809126 | -0.98811 | -0.15374 | 0.017034 | 0.383016 | 2 to 5 year | 4  |
| -0.00317 | -0.00758  | 8.285575 | 0.381979 | -0.92417 | 0.008867 | 0.385166 | Over 10 ye  | 17 |
| 0.000928 | 0.000315  | 7.07586  | -0.01795 | -0.99984 | 0.047869 | 0.34643  | 5 to 10 yea | 26 |
| 0.000179 | -0.00019  | 9.676757 | 0.818019 | 0.575191 | 0.014334 | 0.395231 | Over 10 ye  | 7  |
| 0.002565 | 0.000252  | 7.01588  | -0.81028 | -0.58604 | 0.008547 | 0.386603 | 5 to 10 yea | 8  |
| 0.000928 | 0.000315  | 7.07586  | -0.01795 | -0.99984 | 0.047869 | 0.34643  | 5 to 10 yea | 26 |
| -0.00061 | -0.00019  | 8.427426 | -0.53394 | 0.845524 | 0.000184 | 0.415632 | 2 to 5 year | 3  |
| -0.00351 | -0.00493  | 9.698227 | 0.9886   | -0.15057 | 0.05117  | 0.320754 | 5 to 10 yea | 10 |
| -0.00069 | -0.00049  | 8.958983 | 0.132123 | -0.99123 | 0.044799 | 0.359558 | Over 10 ye  | 34 |
| -0.00125 | -0.00089  | 6.507705 | 0.751696 | -0.65951 | 0.059097 | 0.317329 | 2 to 5 year | 8  |
| 0.002295 | 0.00551   | 4.841191 | -0.19558 | 0.980687 | 0.006205 | 0.387621 | 5 to 10 yea | 10 |
| -0.00108 | -0.00118  | 9.110424 | 0.81459  | -0.58004 | 0.043763 | 0.373741 | 2 to 5 year | 24 |
| -0.00069 | -0.00049  | 8.958983 | 0.132123 | -0.99123 | 0.044799 | 0.359558 | Over 10 ye  | 34 |
| -0.00018 | 0.000577  | 7.314416 | 0.452999 | 0.891511 | 0.078283 | 0.307638 | 5 to 10 yea | 11 |
| 3.30E-05 | 0.000103  | 7.984262 | 0.497598 | -0.86741 | 0.004843 | 0.391127 | 5 to 10 yea | 11 |
| -0.00069 | -0.00049  | 8.958983 | 0.132123 | -0.99123 | 0.044799 | 0.359558 | Over 10 ye  | 34 |
| 0.000179 | -0.00019  | 9.676757 | 0.818019 | 0.575191 | 0.014334 | 0.395231 | Over 10 ye  | 7  |
| -0.00276 | 0.000517  | 8.721258 | -0.29706 | -0.95486 | 0.057471 | 0.335248 | 2 to 5 year | 3  |
| 0.008767 | 0.001926  | 4.580526 | 0.724124 | -0.68967 | 0.001702 | 0.420842 | 2 to 5 year | 2  |
| -0.00014 | 0.000165  | 10.64129 | 0.875599 | -0.48304 | 0.003819 | 0.382867 | 2 to 5 year | 5  |
| 2.80E-05 | 0.000158  | 7.935713 | 0.986909 | -0.16128 | 0.01295  | 0.403363 | 5 to 10 yea | 6  |
| -0.00069 | -0.00049  | 8.958983 | 0.132123 | -0.99123 | 0.044799 | 0.359558 | Over 10 ye  | 34 |
| -0.00019 | -0.00194  | 11.11409 | -0.99996 | 0.009151 | 9.26E-06 | 0.432676 | Over 10 ye  | 1  |
| 0.00096  | 9.00E-05  | 6.846452 | 0.995135 | -0.09852 | 0.035441 | 0.339374 | 2 to 5 year | 5  |
| -0.00023 | 0.000294  | 7.396209 | -0.85928 | 0.511503 | 0.102343 | 0.287067 | 5 to 10 yea | 13 |
| 0.00033  | 0.000413  | 7.68102  | 0.622847 | 0.782343 | 0.01425  | 0.411578 | Over 10 ye  | 14 |
| 0.000928 | 0.000315  | 7.07586  | -0.01795 | -0.99984 | 0.047869 | 0.34643  | 5 to 10 yea | 26 |
| 0.000179 | -0.00019  | 9.676757 | 0.818019 | 0.575191 | 0.014334 | 0.395231 | Over 10 ye  | 7  |

Table S2 - Anonymized database

|           |           |          |          |          |          |          |                  |    |
|-----------|-----------|----------|----------|----------|----------|----------|------------------|----|
| -9.40E-05 | 0.000331  | 7.918806 | -0.84816 | 0.529745 | 0.002653 | 0.416487 | 1 to 2 year      | 2  |
| 8.00E-06  | -1.60E-05 | 13.27315 | 0.748272 | -0.66339 | 8.31E-07 | 0.311308 | 2 to 5 year      | 3  |
| -0.002    | -0.0005   | 7.043015 | -0.99784 | -0.06576 | 0.002133 | 0.399649 | 2 to 5 year      | 6  |
| -0.0006   | 0.001251  | 7.111355 | -0.90249 | 0.430702 | 0.002676 | 0.421914 | 5 to 10 year     | 7  |
| -0.0006   | 0.001251  | 7.111355 | -0.90249 | 0.430702 | 0.002676 | 0.421914 | 5 to 10 year     | 7  |
| -0.00029  | -6.10E-05 | 10.92574 | 0.009512 | -0.99995 | 0.040339 | 0.342214 | 2 to 5 year      | 8  |
| 0.001447  | 0.000749  | 5.42723  | 0.013815 | 0.999905 | 0.000165 | 0.401891 | Over 10 year     | 5  |
| 0.000265  | -0.00173  | 8.467335 | 0.624563 | -0.78097 | 0.032531 | 0.341907 | 2 to 5 year      | 9  |
| -0.00317  | -0.00758  | 8.285575 | 0.381979 | -0.92417 | 0.008867 | 0.385166 | Over 10 year     | 17 |
| 0.000404  | -0.00101  | 6.550444 | -0.98501 | 0.172514 | 0.000392 | 0.415925 | 5 to 10 year     | 9  |
| 0.000112  | 0.000241  | 7.972994 | 0.449417 | 0.893322 | 0.002402 | 0.419275 | 2 to 5 year      | 7  |
| 0.000585  | -9.20E-05 | 7.951361 | 0.67058  | 0.741837 | 0.039557 | 0.340828 | 2 to 5 year      | 5  |
| 8.00E-06  | -1.60E-05 | 13.27315 | 0.748272 | -0.66339 | 8.31E-07 | 0.311308 | 2 to 5 year      | 3  |
| -3.90E-05 | -0.00066  | 10.38832 | -0.13929 | -0.99025 | 0.046155 | 0.323061 | Over 10 year     | 15 |
| -0.00048  | -0.00042  | 10.2381  | -0.54978 | 0.835311 | 0.021104 | 0.374728 | 2 to 5 year      | 3  |
| 0.001105  | 0.000415  | 5.860742 | -0.63306 | -0.7741  | 0.000107 | 0.404435 | 5 to 10 year     | 7  |
| -0.00045  | -0.0004   | 9.139278 | -0.97586 | -0.21837 | 0.009431 | 0.390315 | 2 to 5 year      | 20 |
| -0.00317  | -0.00758  | 8.285575 | 0.381979 | -0.92417 | 0.008867 | 0.385166 | Over 10 year     | 17 |
| -0.0006   | 0.001251  | 7.111355 | -0.90249 | 0.430702 | 0.002676 | 0.421914 | 5 to 10 year     | 7  |
| 0.00033   | 0.000413  | 7.68102  | 0.622847 | 0.782343 | 0.01425  | 0.411578 | Over 10 year     | 14 |
| -0.00149  | -0.00148  | 8.976081 | -0.75992 | 0.650019 | 0.009797 | 0.373252 | 2 to 5 year      | 8  |
| -0.00317  | -0.00758  | 8.285575 | 0.381979 | -0.92417 | 0.008867 | 0.385166 | Over 10 year     | 17 |
| 0.00096   | 0.005301  | 5.114022 | 0.944001 | -0.32994 | 4.06E-05 | 0.399017 | 5 to 10 year     | 10 |
| 0.00364   | 0.001644  | 5.660378 | -0.83004 | -0.55771 | 0.062955 | 0.326097 | 1 to 2 year      | 5  |
| -6.90E-05 | 0.000241  | 7.275188 | 0.854634 | -0.51923 | 0.007868 | 0.389344 | 2 to 5 year      | 2  |
| -0.00054  | -0.00053  | 7.974645 | 0.37949  | -0.9252  | 0.003664 | 0.395188 | Over 10 year     | 16 |
| 0.000705  | 0.000384  | 6.483116 | -0.75141 | 0.659836 | 0.016717 | 0.333957 | Over 10 year     | 9  |
| 0.000545  | -0.00015  | 7.788049 | 0.711975 | -0.70221 | 0.079883 | 0.293708 | 2 to 5 year      | 7  |
| 0.003221  | 0.001054  | 5.788663 | 0.94556  | 0.325447 | 0.005833 | 0.395439 | 2 to 5 year      | 8  |
| -0.00063  | -6.20E-05 | 8.821591 | -0.96326 | -0.26858 | 0.050648 | 0.295265 | 2 to 5 year      | 7  |
| -0.00351  | -0.00493  | 9.698227 | 0.9886   | -0.15057 | 0.05117  | 0.320754 | 5 to 10 year     | 10 |
| 0.000322  | -4.70E-05 | 9.028348 | -0.99976 | -0.02187 | 2.64E-05 | 0.421283 | Less than 1 year | 1  |
| -0.00899  | 0.000177  | 8.424847 | -0.31745 | 0.948276 | 0.010962 | 0.400156 | 1 to 2 year      | 2  |
| 0.002565  | 0.000252  | 7.01588  | -0.81028 | -0.58604 | 0.008547 | 0.386603 | 5 to 10 year     | 8  |
| -0.00069  | -0.00049  | 8.958983 | 0.132123 | -0.99123 | 0.044799 | 0.359558 | Over 10 year     | 34 |
| -0.00276  | 0.000517  | 8.721258 | -0.29706 | -0.95486 | 0.057471 | 0.335248 | 2 to 5 year      | 3  |
| -0.00126  | 0.000191  | 7.233391 | 0.378898 | 0.925438 | 0.008101 | 0.393838 | 1 to 2 year      | 6  |
| -0.00028  | 0.000453  | 6.854851 | 0.797983 | 0.60268  | 0.009312 | 0.395292 | 2 to 5 year      | 16 |
| 0.001039  | 0         | 7.701547 | 0.757136 | -0.65326 | 0.030647 | 0.366727 | 5 to 10 year     | 3  |
| -1.40E-05 | 3.80E-05  | 9.22682  | 0.72213  | 0.691757 | 6.65E-07 | 0.412395 | 2 to 5 year      | 3  |
| -0.00354  | -0.0001   | 7.882977 | 0.95887  | -0.28384 | 0.000103 | 0.423653 | 1 to 2 year      | 12 |
| -0.00201  | 6.60E-05  | 14.15868 | 0.97946  | -0.20164 | 0.020628 | 0.384548 | 2 to 5 year      | 3  |
| -0.00037  | 0.000636  | 6.427949 | -0.7724  | -0.63513 | 0.003948 | 0.402743 | Over 10 year     | 11 |
| 0.000373  | 0.000481  | 7.152483 | -0.42747 | -0.90403 | 0.016893 | 0.387055 | 2 to 5 year      | 11 |
| 0.004227  | 0.002337  | 5.757184 | -0.80577 | -0.59222 | 0.000278 | 0.402242 | Over 10 year     | 7  |
| 3.70E-05  | 0.000344  | 6.792089 | -0.99023 | 0.139451 | 0.012965 | 0.387951 | 2 to 5 year      | 12 |
| 0.0011    | -0.00039  | 9.418569 | 0.243551 | -0.96989 | 0.002535 | 0.408747 | 2 to 5 year      | 6  |
| -0.00249  | -0.00183  | 7.791164 | 0.833364 | 0.552724 | 0.000654 | 0.433276 | 5 to 10 year     | 6  |
| 0.000373  | 0.000481  | 7.152483 | -0.42747 | -0.90403 | 0.016893 | 0.387055 | 2 to 5 year      | 11 |
| -0.00028  | 0.000453  | 6.854851 | 0.797983 | 0.60268  | 0.009312 | 0.395292 | 2 to 5 year      | 16 |



Table S2 - Anonymized database

|           |           |          |          |          |          |          |                  |    |
|-----------|-----------|----------|----------|----------|----------|----------|------------------|----|
| -0.00126  | 0.000191  | 7.233391 | 0.378898 | 0.925438 | 0.008101 | 0.393838 | 1 to 2 year      | 6  |
| 0.001072  | 0.000296  | 8.071708 | 0.069514 | -0.99758 | 0.024897 | 0.373615 | 2 to 5 year      | 3  |
| 0.000125  | 0.000106  | 8.09158  | -0.47147 | -0.88188 | 0.001293 | 0.395439 | 5 to 10 year     | 12 |
| -0.00201  | 6.60E-05  | 14.15868 | 0.97946  | -0.20164 | 0.020628 | 0.384548 | 2 to 5 year      | 3  |
| -0.00091  | -0.00011  | 7.181785 | 0.96959  | 0.244737 | 0.003353 | 0.400542 | 2 to 5 year      | 5  |
| -0.00317  | -0.00758  | 8.285575 | 0.381979 | -0.92417 | 0.008867 | 0.385166 | Over 10 year     | 17 |
| 0.000125  | 0.000106  | 8.09158  | -0.47147 | -0.88188 | 0.001293 | 0.395439 | 5 to 10 year     | 12 |
| -0.00019  | -0.00348  | 9.576899 | -0.63885 | 0.769334 | 0.001559 | 0.412951 | 1 to 2 year      | 2  |
| 0.0011    | -0.00039  | 9.418569 | 0.243551 | -0.96989 | 0.002535 | 0.408747 | 2 to 5 year      | 6  |
| 0.000125  | 0.000106  | 8.09158  | -0.47147 | -0.88188 | 0.001293 | 0.395439 | 5 to 10 year     | 12 |
| -0.00354  | -0.0001   | 7.882977 | 0.95887  | -0.28384 | 0.000103 | 0.423653 | 1 to 2 year      | 12 |
| -0.00069  | -0.00049  | 8.958983 | 0.132123 | -0.99123 | 0.044799 | 0.359558 | Over 10 year     | 34 |
| 2.80E-05  | 0.000158  | 7.935713 | 0.986909 | -0.16128 | 0.01295  | 0.403363 | 5 to 10 year     | 6  |
| -7.20E-05 | -4.70E-05 | 11.12294 | 0.04965  | 0.998767 | 0.103332 | 0.286539 | Over 10 year     | 12 |
| -0.00045  | -0.0004   | 9.139278 | -0.97586 | -0.21837 | 0.009431 | 0.390315 | 2 to 5 year      | 20 |
| 0.000928  | 0.000315  | 7.07586  | -0.01795 | -0.99984 | 0.047869 | 0.34643  | 5 to 10 year     | 26 |
| 0.003221  | 0.001054  | 5.788663 | 0.94556  | 0.325447 | 0.005833 | 0.395439 | 2 to 5 year      | 8  |
| -0.00108  | -0.00118  | 9.110424 | 0.81459  | -0.58004 | 0.043763 | 0.373741 | 2 to 5 year      | 24 |
| 0.003221  | 0.001054  | 5.788663 | 0.94556  | 0.325447 | 0.005833 | 0.395439 | 2 to 5 year      | 8  |
| -0.00125  | -0.00089  | 6.507705 | 0.751696 | -0.65951 | 0.059097 | 0.317329 | 2 to 5 year      | 8  |
| -0.00249  | -0.00183  | 7.791164 | 0.833364 | 0.552724 | 0.000654 | 0.433276 | 5 to 10 year     | 6  |
| -0.00125  | -0.00089  | 6.507705 | 0.751696 | -0.65951 | 0.059097 | 0.317329 | 2 to 5 year      | 8  |
| -0.00107  | -5.70E-05 | 7.900374 | -0.21527 | -0.97655 | 0.002407 | 0.37604  | 5 to 10 year     | 2  |
| 0.000382  | -0.00059  | 12.14705 | 0.290701 | 0.956814 | 0.001242 | 0.395773 | 1 to 2 year      | 11 |
| 8.70E-05  | 2.70E-05  | 6.958606 | -0.76012 | -0.64978 | 0.003537 | 0.38875  | Over 10 year     | 3  |
| -0.00045  | -0.0004   | 9.139278 | -0.97586 | -0.21837 | 0.009431 | 0.390315 | 2 to 5 year      | 20 |
| -0.00253  | -7.40E-05 | 13.57139 | -0.22779 | 0.97371  | 0.032885 | 0.357136 | 1 to 2 year      | 1  |
| 0.000928  | 0.000315  | 7.07586  | -0.01795 | -0.99984 | 0.047869 | 0.34643  | 5 to 10 year     | 26 |
| 0.001133  | 0.000546  | 6.975701 | -0.65862 | 0.752475 | 0.004293 | 0.399878 | 5 to 10 year     | 4  |
| 0.000754  | 3.40E-05  | 6.545462 | 0.443489 | -0.89628 | 0.014039 | 0.374165 | Over 10 year     | 2  |
| -0.00014  | 0.000165  | 10.64129 | 0.875599 | -0.48304 | 0.003819 | 0.382867 | 2 to 5 year      | 5  |
| 3.70E-05  | 0.000344  | 6.792089 | -0.99023 | 0.139451 | 0.012965 | 0.387951 | 2 to 5 year      | 12 |
| -0.00019  | -0.00033  | 9.448408 | 0.474164 | 0.880436 | 1.61E-05 | 0.406384 | 1 to 2 year      | 1  |
| 0.000918  | 0.000957  | 7.354772 | 0.678338 | 0.73475  | 0.014464 | 0.321976 | Less than 1 year | 2  |
| 0.000524  | -0.00082  | 7.77387  | -0.9394  | -0.34282 | 0.019976 | 0.370704 | 2 to 5 year      | 3  |
| -0.00054  | -0.00053  | 7.974645 | 0.37949  | -0.9252  | 0.003664 | 0.395188 | Over 10 year     | 16 |
| 0.000486  | 0.000696  | 7.21388  | -0.99999 | 0.004943 | 0.003964 | 0.413122 | 5 to 10 year     | 4  |
| -0.00045  | -0.0004   | 9.139278 | -0.97586 | -0.21837 | 0.009431 | 0.390315 | 2 to 5 year      | 20 |
| -0.00181  | -3.80E-05 | 11.36418 | -0.63714 | 0.770751 | 0.001584 | 0.411519 | 5 to 10 year     | 5  |
| -0.00069  | -0.00049  | 8.958983 | 0.132123 | -0.99123 | 0.044799 | 0.359558 | Over 10 year     | 34 |
| 0.001447  | 0.000749  | 5.42723  | 0.013815 | 0.999905 | 0.000165 | 0.401891 | Over 10 year     | 5  |
| 0.000705  | 0.000384  | 6.483116 | -0.75141 | 0.659836 | 0.016717 | 0.333957 | Over 10 year     | 9  |
| -0.00899  | 0.000177  | 8.424847 | -0.31745 | 0.948276 | 0.010962 | 0.400156 | 1 to 2 year      | 2  |
| -0.00023  | 0.000294  | 7.396209 | -0.85928 | 0.511503 | 0.102343 | 0.287067 | 5 to 10 year     | 13 |
| 0.008767  | 0.001926  | 4.580526 | 0.724124 | -0.68967 | 0.001702 | 0.420842 | 2 to 5 year      | 2  |
| -0.00354  | -0.0001   | 7.882977 | 0.95887  | -0.28384 | 0.000103 | 0.423653 | 1 to 2 year      | 12 |
| 3.70E-05  | 0.000344  | 6.792089 | -0.99023 | 0.139451 | 0.012965 | 0.387951 | 2 to 5 year      | 12 |
| 0.000382  | -0.00059  | 12.14705 | 0.290701 | 0.956814 | 0.001242 | 0.395773 | 1 to 2 year      | 11 |
| -0.00597  | -0.00256  | 9.492289 | 0.701878 | -0.7123  | 0.000216 | 0.430965 | 2 to 5 year      | 2  |
| 0.00364   | 0.001644  | 5.660378 | -0.83004 | -0.55771 | 0.062955 | 0.326097 | 1 to 2 year      | 5  |

Table S2 - Anonymized database

|           |           |          |          |          |          |          |             |    |
|-----------|-----------|----------|----------|----------|----------|----------|-------------|----|
| -0.00054  | -0.00053  | 7.974645 | 0.37949  | -0.9252  | 0.003664 | 0.395188 | Over 10 ye  | 16 |
| -0.00031  | 0.000414  | 6.752109 | -0.48257 | -0.87585 | 0.000372 | 0.396149 | 2 to 5 year | 4  |
| 0.000437  | 0.00135   | 6.904528 | 0.998935 | 0.04614  | 0.000293 | 0.425109 | 1 to 2 year | 2  |
| -0.00011  | -0.00023  | 10.92632 | 0.31408  | -0.9494  | 0.064053 | 0.313069 | Over 10 ye  | 5  |
| 0.000384  | 0.000594  | 7.174697 | -0.35256 | 0.935788 | 0.042672 | 0.359447 | 2 to 5 year | 5  |
| 0.000708  | 0.000582  | 7.037695 | 0.990504 | 0.137486 | 0.014558 | 0.400028 | Over 10 ye  | 7  |
| -0.00125  | -0.00089  | 6.507705 | 0.751696 | -0.65951 | 0.059097 | 0.317329 | 2 to 5 year | 8  |
| 0.000524  | -0.00082  | 7.77387  | -0.9394  | -0.34282 | 0.019976 | 0.370704 | 2 to 5 year | 3  |
| 0.00096   | 0.005301  | 5.114022 | 0.944001 | -0.32994 | 4.06E-05 | 0.399017 | 5 to 10 yea | 10 |
| -0.00028  | -0.00062  | 10.31837 | -0.92986 | -0.3679  | 0.062812 | 0.32094  | 2 to 5 year | 5  |
| 0.000108  | 1.90E-05  | 10.09791 | 0.863383 | 0.50455  | 0.003253 | 0.431537 | 2 to 5 year | 3  |
| -4.00E-05 | 0.000166  | 6.602221 | -0.24178 | 0.97033  | 0.042414 | 0.328016 | 2 to 5 year | 5  |
| 0.000382  | -0.00059  | 12.14705 | 0.290701 | 0.956814 | 0.001242 | 0.395773 | 1 to 2 year | 11 |
| -0.00023  | 0.000294  | 7.396209 | -0.85928 | 0.511503 | 0.102343 | 0.287067 | 5 to 10 yea | 13 |
| -0.00107  | -5.70E-05 | 7.900374 | -0.21527 | -0.97655 | 0.002407 | 0.37604  | 5 to 10 yea | 2  |
| -9.40E-05 | 0.000331  | 7.918806 | -0.84816 | 0.529745 | 0.002653 | 0.416487 | 1 to 2 year | 2  |
| -0.00045  | -0.0004   | 9.139278 | -0.97586 | -0.21837 | 0.009431 | 0.390315 | 2 to 5 year | 20 |
| 0.000404  | -0.00101  | 6.550444 | -0.98501 | 0.172514 | 0.000392 | 0.415925 | 5 to 10 yea | 9  |
| -0.0005   | 0.00166   | 6.079113 | -0.63624 | -0.77149 | 0.009163 | 0.405865 | 1 to 2 year | 2  |
| -0.00028  | 0.000453  | 6.854851 | 0.797983 | 0.60268  | 0.009312 | 0.395292 | 2 to 5 year | 16 |
| 0.000827  | 0.000962  | 6.420393 | -0.99141 | -0.13081 | 0.001287 | 0.426577 | 1 to 2 year | 3  |
| -0.00108  | -0.00118  | 9.110424 | 0.81459  | -0.58004 | 0.043763 | 0.373741 | 2 to 5 year | 24 |
| 0.00033   | 0.000413  | 7.68102  | 0.622847 | 0.782343 | 0.01425  | 0.411578 | Over 10 ye  | 14 |
| -0.00103  | -0.0005   | 9.234109 | -0.53885 | 0.842403 | 0.077446 | 0.322683 | 2 to 5 year | 2  |
| -0.00243  | -0.00465  | 7.259941 | 0.896445 | 0.443156 | 6.97E-05 | 0.422515 | 2 to 5 year | 2  |
| -0.00069  | -0.00049  | 8.958983 | 0.132123 | -0.99123 | 0.044799 | 0.359558 | Over 10 ye  | 34 |
| 0.000263  | 0.000325  | 7.37233  | 0.554118 | 0.832438 | 0.035376 | 0.346586 | 1 to 2 year | 1  |
| 0.002295  | 0.00551   | 4.841191 | -0.19558 | 0.980687 | 0.006205 | 0.387621 | 5 to 10 yea | 10 |
| -0.00029  | -6.10E-05 | 10.92574 | 0.009512 | -0.99995 | 0.040339 | 0.342214 | 2 to 5 year | 8  |
| -0.00037  | 0.000636  | 6.427949 | -0.7724  | -0.63513 | 0.003948 | 0.402743 | Over 10 ye  | 11 |
| -0.0006   | 0.001251  | 7.111355 | -0.90249 | 0.430702 | 0.002676 | 0.421914 | 5 to 10 yea | 7  |
| -7.20E-05 | -4.70E-05 | 11.12294 | 0.04965  | 0.998767 | 0.103332 | 0.286539 | Over 10 ye  | 12 |
| -0.00054  | -0.00053  | 7.974645 | 0.37949  | -0.9252  | 0.003664 | 0.395188 | Over 10 ye  | 16 |
| 0.004227  | 0.002337  | 5.757184 | -0.80577 | -0.59222 | 0.000278 | 0.402242 | Over 10 ye  | 7  |
| -0.00108  | -0.00118  | 9.110424 | 0.81459  | -0.58004 | 0.043763 | 0.373741 | 2 to 5 year | 24 |
| 0.000486  | 0.000696  | 7.21388  | -0.99999 | 0.004943 | 0.003964 | 0.413122 | 5 to 10 yea | 4  |
| 0.001447  | 0.000749  | 5.42723  | 0.013815 | 0.999905 | 0.000165 | 0.401891 | Over 10 ye  | 5  |
| -0.00069  | -0.00049  | 8.958983 | 0.132123 | -0.99123 | 0.044799 | 0.359558 | Over 10 ye  | 34 |
| 0.000486  | 0.000696  | 7.21388  | -0.99999 | 0.004943 | 0.003964 | 0.413122 | 5 to 10 yea | 4  |
| 0.000382  | -0.00059  | 12.14705 | 0.290701 | 0.956814 | 0.001242 | 0.395773 | 1 to 2 year | 11 |
| -0.00028  | 0.000453  | 6.854851 | 0.797983 | 0.60268  | 0.009312 | 0.395292 | 2 to 5 year | 16 |
| 0.00033   | 0.000413  | 7.68102  | 0.622847 | 0.782343 | 0.01425  | 0.411578 | Over 10 ye  | 14 |
| 0.000373  | 0.000481  | 7.152483 | -0.42747 | -0.90403 | 0.016893 | 0.387055 | 2 to 5 year | 11 |
| -0.00019  | -0.00348  | 9.576899 | -0.63885 | 0.769334 | 0.001559 | 0.412951 | 1 to 2 year | 2  |
| 0.000705  | 0.000384  | 6.483116 | -0.75141 | 0.659836 | 0.016717 | 0.333957 | Over 10 ye  | 9  |
| -0.00063  | -6.20E-05 | 8.821591 | -0.96326 | -0.26858 | 0.050648 | 0.295265 | 2 to 5 year | 7  |
| -0.00013  | 0.000117  | 9.363936 | -0.85537 | -0.51802 | 0.068087 | 0.336834 | 2 to 5 year | 5  |
| 0.002301  | 0.003581  | 5.215646 | 0.603308 | 0.797508 | 0.01096  | 0.389974 | 1 to 2 year | 5  |
| -0.00028  | 0.000453  | 6.854851 | 0.797983 | 0.60268  | 0.009312 | 0.395292 | 2 to 5 year | 16 |
| -0.00023  | 0.000294  | 7.396209 | -0.85928 | 0.511503 | 0.102343 | 0.287067 | 5 to 10 yea | 13 |

Table S2 - Anonymized database

|           |           |          |          |          |          |          |             |    |
|-----------|-----------|----------|----------|----------|----------|----------|-------------|----|
| 0.00033   | 0.000413  | 7.68102  | 0.622847 | 0.782343 | 0.01425  | 0.411578 | Over 10 ye  | 14 |
| -0.00108  | 0.000143  | 9.864983 | -0.52344 | 0.852061 | 0.018665 | 0.380921 | 2 to 5 year | 2  |
| -0.00018  | 0.000166  | 9.809126 | -0.98811 | -0.15374 | 0.017034 | 0.383016 | 2 to 5 year | 4  |
| 3.70E-05  | 0.000344  | 6.792089 | -0.99023 | 0.139451 | 0.012965 | 0.387951 | 2 to 5 year | 12 |
| 0.000453  | 0.000402  | 7.477843 | 0.861715 | -0.50739 | 0.01583  | 0.397747 | 2 to 5 year | 3  |
| 0.000928  | 0.000315  | 7.07586  | -0.01795 | -0.99984 | 0.047869 | 0.34643  | 5 to 10 ya  | 26 |
| -0.00317  | -0.00758  | 8.285575 | 0.381979 | -0.92417 | 0.008867 | 0.385166 | Over 10 ye  | 17 |
| 0.000928  | 0.000315  | 7.07586  | -0.01795 | -0.99984 | 0.047869 | 0.34643  | 5 to 10 ya  | 26 |
| 0.000545  | -0.00015  | 7.788049 | 0.711975 | -0.70221 | 0.079883 | 0.293708 | 2 to 5 year | 7  |
| 0.000498  | 0.000841  | 8.941735 | 0.823845 | -0.56681 | 0.013135 | 0.383289 | 2 to 5 year | 2  |
| 0.000708  | 0.000582  | 7.037695 | 0.990504 | 0.137486 | 0.014558 | 0.400028 | Over 10 ye  | 7  |
| -7.20E-05 | -4.70E-05 | 11.12294 | 0.04965  | 0.998767 | 0.103332 | 0.286539 | Over 10 ye  | 12 |
| 0.000453  | 0.000402  | 7.477843 | 0.861715 | -0.50739 | 0.01583  | 0.397747 | 2 to 5 year | 3  |
| 0.002295  | 0.00551   | 4.841191 | -0.19558 | 0.980687 | 0.006205 | 0.387621 | 5 to 10 ya  | 10 |
| -0.00023  | 0.000294  | 7.396209 | -0.85928 | 0.511503 | 0.102343 | 0.287067 | 5 to 10 ya  | 13 |
| -0.00045  | -0.0004   | 9.139278 | -0.97586 | -0.21837 | 0.009431 | 0.390315 | 2 to 5 year | 20 |
| -0.00317  | -0.00758  | 8.285575 | 0.381979 | -0.92417 | 0.008867 | 0.385166 | Over 10 ye  | 17 |
| -0.00069  | -0.00049  | 8.958983 | 0.132123 | -0.99123 | 0.044799 | 0.359558 | Over 10 ye  | 34 |
| 0.000265  | -0.00173  | 8.467335 | 0.624563 | -0.78097 | 0.032531 | 0.341907 | 2 to 5 year | 9  |
| -0.00108  | -0.00118  | 9.110424 | 0.81459  | -0.58004 | 0.043763 | 0.373741 | 2 to 5 year | 24 |
| 0.00096   | 0.005301  | 5.114022 | 0.944001 | -0.32994 | 4.06E-05 | 0.399017 | 5 to 10 ya  | 10 |
| 0.00033   | 0.000413  | 7.68102  | 0.622847 | 0.782343 | 0.01425  | 0.411578 | Over 10 ye  | 14 |
| 0.00033   | 0.000413  | 7.68102  | 0.622847 | 0.782343 | 0.01425  | 0.411578 | Over 10 ye  | 14 |
| 0.00033   | 0.000413  | 7.68102  | 0.622847 | 0.782343 | 0.01425  | 0.411578 | Over 10 ye  | 14 |
| 0.002295  | 0.00551   | 4.841191 | -0.19558 | 0.980687 | 0.006205 | 0.387621 | 5 to 10 ya  | 10 |
| -0.00046  | 0.002523  | 5.318647 | 0.781001 | 0.62453  | 0.042118 | 0.349723 | Over 10 ye  | 3  |
| -0.00018  | 0.000577  | 7.314416 | 0.452999 | 0.891511 | 0.078283 | 0.307638 | 5 to 10 ya  | 11 |
| 0.000585  | -9.20E-05 | 7.951361 | 0.67058  | 0.741837 | 0.039557 | 0.340828 | 2 to 5 year | 5  |
| -1.40E-05 | 3.80E-05  | 9.22682  | 0.72213  | 0.691757 | 6.65E-07 | 0.412395 | 2 to 5 year | 3  |
| -0.00069  | -0.00049  | 8.958983 | 0.132123 | -0.99123 | 0.044799 | 0.359558 | Over 10 ye  | 34 |
| 0.000708  | 0.000582  | 7.037695 | 0.990504 | 0.137486 | 0.014558 | 0.400028 | Over 10 ye  | 7  |
| 3.30E-05  | 0.000103  | 7.984262 | 0.497598 | -0.86741 | 0.004843 | 0.391127 | 5 to 10 ya  | 11 |
| 0.000545  | -0.00015  | 7.788049 | 0.711975 | -0.70221 | 0.079883 | 0.293708 | 2 to 5 year | 7  |
| -0.00019  | 0.000252  | 9.080857 | -0.15098 | 0.988537 | 0.023393 | 0.371974 | Over 10 ye  | 10 |
| 0.000382  | -0.00059  | 12.14705 | 0.290701 | 0.956814 | 0.001242 | 0.395773 | 1 to 2 year | 11 |
| 0.000928  | 0.000315  | 7.07586  | -0.01795 | -0.99984 | 0.047869 | 0.34643  | 5 to 10 ya  | 26 |
| -0.00019  | 0.000252  | 9.080857 | -0.15098 | 0.988537 | 0.023393 | 0.371974 | Over 10 ye  | 10 |
| 0.001468  | -3.60E-05 | 6.365498 | 0.172739 | 0.984968 | 0.056563 | 0.311263 | 1 to 2 year | 2  |
| 0.001105  | 0.000415  | 5.860742 | -0.63306 | -0.7741  | 0.000107 | 0.404435 | 5 to 10 ya  | 7  |
| 0.000106  | 0.000435  | 10.30726 | -0.07783 | 0.996966 | 0.000332 | 0.395629 | 5 to 10 ya  | 4  |
| 0.000545  | -0.00015  | 7.788049 | 0.711975 | -0.70221 | 0.079883 | 0.293708 | 2 to 5 year | 7  |
| 0.000928  | 0.000315  | 7.07586  | -0.01795 | -0.99984 | 0.047869 | 0.34643  | 5 to 10 ya  | 26 |
| 0.00096   | 0.005301  | 5.114022 | 0.944001 | -0.32994 | 4.06E-05 | 0.399017 | 5 to 10 ya  | 10 |
| -0.00028  | 0.000453  | 6.854851 | 0.797983 | 0.60268  | 0.009312 | 0.395292 | 2 to 5 year | 16 |
| -0.00237  | 0.000735  | 6.755063 | 0.091776 | -0.99578 | 0.017132 | 0.354799 | 2 to 5 year | 2  |
| -0.00019  | 0.000252  | 9.080857 | -0.15098 | 0.988537 | 0.023393 | 0.371974 | Over 10 ye  | 10 |
| -3.90E-05 | -0.00066  | 10.38832 | -0.13929 | -0.99025 | 0.046155 | 0.323061 | Over 10 ye  | 15 |
| -0.00048  | -0.00042  | 8.983812 | -0.95159 | 0.307365 | 0.001385 | 0.40293  | 2 to 5 year | 5  |
| -0.00037  | 0.000395  | 7.243243 | -0.01524 | 0.999884 | 0.037988 | 0.325697 | 2 to 5 year | 6  |
| -7.20E-05 | -4.70E-05 | 11.12294 | 0.04965  | 0.998767 | 0.103332 | 0.286539 | Over 10 ye  | 12 |

Table S2 - Anonymized database

|           |           |          |          |          |          |          |              |    |
|-----------|-----------|----------|----------|----------|----------|----------|--------------|----|
| -0.00108  | -0.00118  | 9.110424 | 0.81459  | -0.58004 | 0.043763 | 0.373741 | 2 to 5 year  | 24 |
| 0.000404  | -0.00101  | 6.550444 | -0.98501 | 0.172514 | 0.000392 | 0.415925 | 5 to 10 year | 9  |
| 0.000705  | 0.000384  | 6.483116 | -0.75141 | 0.659836 | 0.016717 | 0.333957 | Over 10 year | 9  |
| 0.000382  | -0.00059  | 12.14705 | 0.290701 | 0.956814 | 0.001242 | 0.395773 | 1 to 2 year  | 11 |
| -0.00013  | 0.000117  | 9.363936 | -0.85537 | -0.51802 | 0.068087 | 0.336834 | 2 to 5 year  | 5  |
| -0.00102  | -0.00061  | 11.12156 | 0.96399  | 0.265938 | 0.050741 | 0.34748  | 1 to 2 year  | 3  |
| 0.000827  | 0.000962  | 6.420393 | -0.99141 | -0.13081 | 0.001287 | 0.426577 | 1 to 2 year  | 3  |
| -0.00149  | -0.00148  | 8.976081 | -0.75992 | 0.650019 | 0.009797 | 0.373252 | 2 to 5 year  | 8  |
| 0.000425  | 0.000244  | 7.423181 | -0.58327 | 0.81228  | 0.006118 | 0.419368 | 1 to 2 year  | 2  |
| -0.00017  | -8.30E-05 | 10.68071 | -0.56871 | -0.82254 | 0.00063  | 0.42541  | 5 to 10 year | 2  |
| -0.00108  | -0.00118  | 9.110424 | 0.81459  | -0.58004 | 0.043763 | 0.373741 | 2 to 5 year  | 24 |
| -0.00018  | 0.000577  | 7.314416 | 0.452999 | 0.891511 | 0.078283 | 0.307638 | 5 to 10 year | 11 |
| -0.00245  | 0.000323  | 7.116082 | -0.0026  | 0.999997 | 0.00016  | 0.411031 | 2 to 5 year  | 2  |
| 0.000928  | 0.000315  | 7.07586  | -0.01795 | -0.99984 | 0.047869 | 0.34643  | 5 to 10 year | 26 |
| -0.00069  | -0.00049  | 8.958983 | 0.132123 | -0.99123 | 0.044799 | 0.359558 | Over 10 year | 34 |
| 8.50E-05  | -0.00011  | 8.182613 | 0.65839  | -0.75268 | 0.00036  | 0.432406 | 2 to 5 year  | 5  |
| 0.001566  | -0.00187  | 6.3935   | 0.976425 | -0.21586 | 0.018741 | 0.371319 | 2 to 5 year  | 1  |
| -0.00014  | 0.000165  | 10.64129 | 0.875599 | -0.48304 | 0.003819 | 0.382867 | 2 to 5 year  | 5  |
| -0.00011  | -0.00023  | 10.92632 | 0.31408  | -0.9494  | 0.064053 | 0.313069 | Over 10 year | 5  |
| -3.90E-05 | -0.00066  | 10.38832 | -0.13929 | -0.99025 | 0.046155 | 0.323061 | Over 10 year | 15 |
| -0.00245  | 0.000323  | 7.116082 | -0.0026  | 0.999997 | 0.00016  | 0.411031 | 2 to 5 year  | 2  |
| -0.00045  | -0.0004   | 9.139278 | -0.97586 | -0.21837 | 0.009431 | 0.390315 | 2 to 5 year  | 20 |
| 0.000332  | 0.001614  | 5.844646 | 0.999888 | 0.014955 | 0.022942 | 0.378116 | Over 10 year | 4  |
| 0.000872  | 0.000622  | 7.015728 | -0.62153 | -0.78339 | 0.011947 | 0.403054 | 1 to 2 year  | 2  |
| -0.00069  | -0.00049  | 8.958983 | 0.132123 | -0.99123 | 0.044799 | 0.359558 | Over 10 year | 34 |
| -0.00354  | -0.0001   | 7.882977 | 0.95887  | -0.28384 | 0.000103 | 0.423653 | 1 to 2 year  | 12 |
| -6.90E-05 | 0.000241  | 7.275188 | 0.854634 | -0.51923 | 0.007868 | 0.389344 | 2 to 5 year  | 2  |
| 0.001072  | 0.000296  | 8.071708 | 0.069514 | -0.99758 | 0.024897 | 0.373615 | 2 to 5 year  | 3  |
| 0.001133  | 0.000546  | 6.975701 | -0.65862 | 0.752475 | 0.004293 | 0.399878 | 5 to 10 year | 4  |
| 0.001105  | 0.000415  | 5.860742 | -0.63306 | -0.7741  | 0.000107 | 0.404435 | 5 to 10 year | 7  |
| -0.00317  | -0.00758  | 8.285575 | 0.381979 | -0.92417 | 0.008867 | 0.385166 | Over 10 year | 17 |
| -0.00108  | -0.00118  | 9.110424 | 0.81459  | -0.58004 | 0.043763 | 0.373741 | 2 to 5 year  | 24 |
| -3.40E-05 | -0.00087  | 9.206155 | -0.75518 | 0.65552  | 0.021835 | 0.387149 | 5 to 10 year | 6  |
| 2.20E-05  | -0.00026  | 8.60884  | 0.084634 | -0.99641 | 1.55E-05 | 0.411413 | 2 to 5 year  | 9  |
| -0.00317  | -0.00758  | 8.285575 | 0.381979 | -0.92417 | 0.008867 | 0.385166 | Over 10 year | 17 |
| 0.000332  | 0.001614  | 5.844646 | 0.999888 | 0.014955 | 0.022942 | 0.378116 | Over 10 year | 4  |
| -7.20E-05 | -4.70E-05 | 11.12294 | 0.04965  | 0.998767 | 0.103332 | 0.286539 | Over 10 year | 12 |
| -0.00028  | -0.00062  | 10.31837 | -0.92986 | -0.3679  | 0.062812 | 0.32094  | 2 to 5 year  | 5  |
| 0.000437  | 0.00135   | 6.904528 | 0.998935 | 0.04614  | 0.000293 | 0.425109 | 1 to 2 year  | 2  |
| -0.00108  | -0.00118  | 9.110424 | 0.81459  | -0.58004 | 0.043763 | 0.373741 | 2 to 5 year  | 24 |
| 0.000928  | 0.000315  | 7.07586  | -0.01795 | -0.99984 | 0.047869 | 0.34643  | 5 to 10 year | 26 |
| 2.80E-05  | 0.000158  | 7.935713 | 0.986909 | -0.16128 | 0.01295  | 0.403363 | 5 to 10 year | 6  |
| -0.00069  | -0.00049  | 8.958983 | 0.132123 | -0.99123 | 0.044799 | 0.359558 | Over 10 year | 34 |
| -0.00046  | 0.002523  | 5.318647 | 0.781001 | 0.62453  | 0.042118 | 0.349723 | Over 10 year | 3  |
| -0.00028  | 0.000453  | 6.854851 | 0.797983 | 0.60268  | 0.009312 | 0.395292 | 2 to 5 year  | 16 |
| 0.000373  | 0.000481  | 7.152483 | -0.42747 | -0.90403 | 0.016893 | 0.387055 | 2 to 5 year  | 11 |
| 0.0011    | -0.00039  | 9.418569 | 0.243551 | -0.96989 | 0.002535 | 0.408747 | 2 to 5 year  | 6  |
| 0.000265  | -0.00173  | 8.467335 | 0.624563 | -0.78097 | 0.032531 | 0.341907 | 2 to 5 year  | 9  |
| -0.00126  | 0.000191  | 7.233391 | 0.378898 | 0.925438 | 0.008101 | 0.393838 | 1 to 2 year  | 6  |
| -0.00249  | -0.00183  | 7.791164 | 0.833364 | 0.552724 | 0.000654 | 0.433276 | 5 to 10 year | 6  |

Table S2 - Anonymized database

|           |           |          |          |          |          |          |             |    |
|-----------|-----------|----------|----------|----------|----------|----------|-------------|----|
| -0.00069  | -0.00049  | 8.958983 | 0.132123 | -0.99123 | 0.044799 | 0.359558 | Over 10 ye  | 34 |
| 0.001771  | 0.001576  | 6.105651 | -0.99955 | 0.029905 | 0.000843 | 0.430229 | Over 10 ye  | 2  |
| 0.000545  | -0.00015  | 7.788049 | 0.711975 | -0.70221 | 0.079883 | 0.293708 | 2 to 5 year | 7  |
| -3.40E-05 | -0.00087  | 9.206155 | -0.75518 | 0.65552  | 0.021835 | 0.387149 | 5 to 10 ya  | 6  |
| 0.002565  | 0.000252  | 7.01588  | -0.81028 | -0.58604 | 0.008547 | 0.386603 | 5 to 10 ya  | 8  |
| -0.00018  | 0.000577  | 7.314416 | 0.452999 | 0.891511 | 0.078283 | 0.307638 | 5 to 10 ya  | 11 |
| 0.000928  | 0.000315  | 7.07586  | -0.01795 | -0.99984 | 0.047869 | 0.34643  | 5 to 10 ya  | 26 |
| 0.000199  | -0.00019  | 8.966571 | -0.91646 | -0.40012 | 0.004935 | 0.377711 | 5 to 10 ya  | 2  |
| 0.000928  | 0.000315  | 7.07586  | -0.01795 | -0.99984 | 0.047869 | 0.34643  | 5 to 10 ya  | 26 |
| -0.00037  | 0.000636  | 6.427949 | -0.7724  | -0.63513 | 0.003948 | 0.402743 | Over 10 ye  | 11 |
| -0.00171  | 0.000814  | 6.917393 | 0.837894 | -0.54583 | 0.061167 | 0.312614 | 1 to 2 year | 2  |
| 0.001131  | 0.00063   | 7.54068  | 0.908182 | -0.41858 | 0.339062 | 0.343287 | 5 to 10 ya  | 5  |
| -0.00324  | -9.00E-04 | 12.5425  | -0.65231 | 0.757956 | 0.052029 | 0.311606 | 2 to 5 year | 3  |
| 0.00096   | 9.00E-05  | 6.846452 | 0.995135 | -0.09852 | 0.035441 | 0.339374 | 2 to 5 year | 5  |
| -0.00317  | -0.00758  | 8.285575 | 0.381979 | -0.92417 | 0.008867 | 0.385166 | Over 10 ye  | 17 |
| 0.003221  | 0.001054  | 5.788663 | 0.94556  | 0.325447 | 0.005833 | 0.395439 | 2 to 5 year | 8  |
| 3.30E-05  | 0.000103  | 7.984262 | 0.497598 | -0.86741 | 0.004843 | 0.391127 | 5 to 10 ya  | 11 |
| 0.000699  | -0.00033  | 7.434845 | -0.42134 | -0.9069  | 0.036834 | 0.356765 | 2 to 5 year | 2  |
| 0.004227  | 0.002337  | 5.757184 | -0.80577 | -0.59222 | 0.000278 | 0.402242 | Over 10 ye  | 7  |
| -0.00018  | 0.000577  | 7.314416 | 0.452999 | 0.891511 | 0.078283 | 0.307638 | 5 to 10 ya  | 11 |
| -0.00125  | -0.00089  | 6.507705 | 0.751696 | -0.65951 | 0.059097 | 0.317329 | 2 to 5 year | 8  |
| 0.000928  | 0.000315  | 7.07586  | -0.01795 | -0.99984 | 0.047869 | 0.34643  | 5 to 10 ya  | 26 |
| 3.30E-05  | 0.000103  | 7.984262 | 0.497598 | -0.86741 | 0.004843 | 0.391127 | 5 to 10 ya  | 11 |
| -0.00023  | 0.000294  | 7.396209 | -0.85928 | 0.511503 | 0.102343 | 0.287067 | 5 to 10 ya  | 13 |
| 0.001547  | 0.000517  | 6.168585 | 0.008704 | 0.999962 | 0.001499 | 0.425114 | 5 to 10 ya  | 3  |
| 3.70E-05  | 0.000344  | 6.792089 | -0.99023 | 0.139451 | 0.012965 | 0.387951 | 2 to 5 year | 12 |
| 0.00033   | 0.000413  | 7.68102  | 0.622847 | 0.782343 | 0.01425  | 0.411578 | Over 10 ye  | 14 |
| -4.00E-05 | 0.000166  | 6.602221 | -0.24178 | 0.97033  | 0.042414 | 0.328016 | 2 to 5 year | 5  |
| -0.00019  | 0.000252  | 9.080857 | -0.15098 | 0.988537 | 0.023393 | 0.371974 | Over 10 ye  | 10 |
| 0.000108  | 1.90E-05  | 10.09791 | 0.863383 | 0.50455  | 0.003253 | 0.431537 | 2 to 5 year | 3  |
| 0.000106  | 0.000435  | 10.30726 | -0.07783 | 0.996966 | 0.000332 | 0.395629 | 5 to 10 ya  | 4  |
| -0.0006   | 0.001251  | 7.111355 | -0.90249 | 0.430702 | 0.002676 | 0.421914 | 5 to 10 ya  | 7  |
| -0.00011  | -0.00023  | 10.92632 | 0.31408  | -0.9494  | 0.064053 | 0.313069 | Over 10 ye  | 5  |
| 0.002139  | -0.00178  | 6.95804  | -0.13969 | 0.990196 | 0.009714 | 0.385306 | 1 to 2 year | 7  |
| -0.00029  | -6.10E-05 | 10.92574 | 0.009512 | -0.99995 | 0.040339 | 0.342214 | 2 to 5 year | 8  |
| -0.00028  | 0.000453  | 6.854851 | 0.797983 | 0.60268  | 0.009312 | 0.395292 | 2 to 5 year | 16 |
| -3.40E-05 | -0.00087  | 9.206155 | -0.75518 | 0.65552  | 0.021835 | 0.387149 | 5 to 10 ya  | 6  |
| 0.001072  | 0.000296  | 8.071708 | 0.069514 | -0.99758 | 0.024897 | 0.373615 | 2 to 5 year | 3  |
| -0.00045  | -0.0004   | 9.139278 | -0.97586 | -0.21837 | 0.009431 | 0.390315 | 2 to 5 year | 20 |
| 0.004227  | 0.002337  | 5.757184 | -0.80577 | -0.59222 | 0.000278 | 0.402242 | Over 10 ye  | 7  |
| 0.000498  | 0.000841  | 8.941735 | 0.823845 | -0.56681 | 0.013135 | 0.383289 | 2 to 5 year | 2  |
| 0.001105  | 0.000415  | 5.860742 | -0.63306 | -0.7741  | 0.000107 | 0.404435 | 5 to 10 ya  | 7  |
| 0.001133  | 0.000546  | 6.975701 | -0.65862 | 0.752475 | 0.004293 | 0.399878 | 5 to 10 ya  | 4  |
| 0.000265  | -0.00173  | 8.467335 | 0.624563 | -0.78097 | 0.032531 | 0.341907 | 2 to 5 year | 9  |
| -0.00037  | 0.000636  | 6.427949 | -0.7724  | -0.63513 | 0.003948 | 0.402743 | Over 10 ye  | 11 |
| -0.00069  | -0.00049  | 8.958983 | 0.132123 | -0.99123 | 0.044799 | 0.359558 | Over 10 ye  | 34 |
| 0.000971  | 0.00096   | 6.294988 | 0.703294 | -0.7109  | 0.039269 | 0.364845 | 5 to 10 ya  | 2  |
| -0.00069  | -0.00049  | 8.958983 | 0.132123 | -0.99123 | 0.044799 | 0.359558 | Over 10 ye  | 34 |
| 0.00033   | 0.000413  | 7.68102  | 0.622847 | 0.782343 | 0.01425  | 0.411578 | Over 10 ye  | 14 |
| -0.00028  | 0.000453  | 6.854851 | 0.797983 | 0.60268  | 0.009312 | 0.395292 | 2 to 5 year | 16 |

Table S2 - Anonymized database

|           |           |          |          |          |          |          |              |    |
|-----------|-----------|----------|----------|----------|----------|----------|--------------|----|
| -0.00018  | 0.000577  | 7.314416 | 0.452999 | 0.891511 | 0.078283 | 0.307638 | 5 to 10 year | 11 |
| -3.90E-05 | -0.00066  | 10.38832 | -0.13929 | -0.99025 | 0.046155 | 0.323061 | Over 10 ye   | 15 |
| -0.00029  | -6.10E-05 | 10.92574 | 0.009512 | -0.99995 | 0.040339 | 0.342214 | 2 to 5 year  | 8  |
| -0.00354  | -0.0001   | 7.882977 | 0.95887  | -0.28384 | 0.000103 | 0.423653 | 1 to 2 year  | 12 |
| -0.00276  | 0.000517  | 8.721258 | -0.29706 | -0.95486 | 0.057471 | 0.335248 | 2 to 5 year  | 3  |
| -0.00069  | -0.00049  | 8.958983 | 0.132123 | -0.99123 | 0.044799 | 0.359558 | Over 10 ye   | 34 |
| 0.000708  | 0.000582  | 7.037695 | 0.990504 | 0.137486 | 0.014558 | 0.400028 | Over 10 ye   | 7  |
| 3.30E-05  | 0.000103  | 7.984262 | 0.497598 | -0.86741 | 0.004843 | 0.391127 | 5 to 10 year | 11 |
| 0.00018   | -0.00015  | 9.943292 | 0.995409 | -0.09571 | 0.010153 | 0.375219 | 2 to 5 year  | 2  |
| 0.000242  | -4.50E-05 | 7.396961 | -0.96834 | 0.249643 | 0.024769 | 0.391333 | 1 to 2 year  | 3  |
| -0.00045  | -0.0004   | 9.139278 | -0.97586 | -0.21837 | 0.009431 | 0.390315 | 2 to 5 year  | 20 |
| -0.00045  | -0.0004   | 9.139278 | -0.97586 | -0.21837 | 0.009431 | 0.390315 | 2 to 5 year  | 20 |
| -0.00043  | 0.000222  | 6.91947  | -0.59886 | -0.80085 | 0.003814 | 0.39002  | 2 to 5 year  | 4  |
| -0.00069  | -0.00049  | 8.958983 | 0.132123 | -0.99123 | 0.044799 | 0.359558 | Over 10 ye   | 34 |
| -3.90E-05 | -0.00066  | 10.38832 | -0.13929 | -0.99025 | 0.046155 | 0.323061 | Over 10 ye   | 15 |
| 0.000476  | -0.0004   | 9.722341 | 0.966119 | 0.258098 | 0.036207 | 0.34751  | 5 to 10 year | 3  |
| 0.001105  | 0.000415  | 5.860742 | -0.63306 | -0.7741  | 0.000107 | 0.404435 | 5 to 10 year | 7  |
| -0.00054  | -0.00053  | 7.974645 | 0.37949  | -0.9252  | 0.003664 | 0.395188 | Over 10 ye   | 16 |
| -0.00045  | -0.0004   | 9.139278 | -0.97586 | -0.21837 | 0.009431 | 0.390315 | 2 to 5 year  | 20 |
| -0.00028  | 0.000453  | 6.854851 | 0.797983 | 0.60268  | 0.009312 | 0.395292 | 2 to 5 year  | 16 |
| -0.00031  | 0.000414  | 6.752109 | -0.48257 | -0.87585 | 0.000372 | 0.396149 | 2 to 5 year  | 4  |
| -4.00E-05 | 0.000166  | 6.602221 | -0.24178 | 0.97033  | 0.042414 | 0.328016 | 2 to 5 year  | 5  |
| 3.00E-06  | -0.00061  | 12.34398 | 0.695892 | 0.718146 | 3.18E-05 | 0.406127 | 2 to 5 year  | 3  |
| 0.000705  | 0.000384  | 6.483116 | -0.75141 | 0.659836 | 0.016717 | 0.333957 | Over 10 ye   | 9  |
| 0.002444  | -0.00025  | 6.068515 | -0.99992 | -0.01246 | 0.00288  | 0.395734 | 2 to 5 year  | 4  |
| 0.000404  | -0.00101  | 6.550444 | -0.98501 | 0.172514 | 0.000392 | 0.415925 | 5 to 10 year | 9  |
| -0.00126  | 0.000191  | 7.233391 | 0.378898 | 0.925438 | 0.008101 | 0.393838 | 1 to 2 year  | 6  |
| 0.002301  | 0.003581  | 5.215646 | 0.603308 | 0.797508 | 0.01096  | 0.389974 | 1 to 2 year  | 5  |
| -0.0006   | 0.001251  | 7.111355 | -0.90249 | 0.430702 | 0.002676 | 0.421914 | 5 to 10 year | 7  |
| -0.00054  | -0.00053  | 7.974645 | 0.37949  | -0.9252  | 0.003664 | 0.395188 | Over 10 ye   | 16 |
| 0.000112  | 0.000241  | 7.972994 | 0.449417 | 0.893322 | 0.002402 | 0.419275 | 2 to 5 year  | 7  |
| -0.00351  | -0.00493  | 9.698227 | 0.9886   | -0.15057 | 0.05117  | 0.320754 | 5 to 10 year | 10 |
| -0.00249  | -0.00183  | 7.791164 | 0.833364 | 0.552724 | 0.000654 | 0.433276 | 5 to 10 year | 6  |
| 2.20E-05  | -0.00026  | 8.60884  | 0.084634 | -0.99641 | 1.55E-05 | 0.411413 | 2 to 5 year  | 9  |
| 0.001535  | 0.000484  | 6.717156 | -0.14995 | -0.98869 | 0.058258 | 0.334687 | 1 to 2 year  | 2  |
| -7.20E-05 | -4.70E-05 | 11.12294 | 0.04965  | 0.998767 | 0.103332 | 0.286539 | Over 10 ye   | 12 |
| 3.70E-05  | 0.000344  | 6.792089 | -0.99023 | 0.139451 | 0.012965 | 0.387951 | 2 to 5 year  | 12 |
| 0.002139  | -0.00178  | 6.95804  | -0.13969 | 0.990196 | 0.009714 | 0.385306 | 1 to 2 year  | 7  |
| 0.000125  | 0.000106  | 8.09158  | -0.47147 | -0.88188 | 0.001293 | 0.395439 | 5 to 10 year | 12 |
| -0.00045  | -0.0004   | 9.139278 | -0.97586 | -0.21837 | 0.009431 | 0.390315 | 2 to 5 year  | 20 |
| -0.00108  | -0.00118  | 9.110424 | 0.81459  | -0.58004 | 0.043763 | 0.373741 | 2 to 5 year  | 24 |
| -0.00018  | 0.000577  | 7.314416 | 0.452999 | 0.891511 | 0.078283 | 0.307638 | 5 to 10 year | 11 |
| 0.000382  | -0.00059  | 12.14705 | 0.290701 | 0.956814 | 0.001242 | 0.395773 | 1 to 2 year  | 11 |
| -0.00354  | -0.0001   | 7.882977 | 0.95887  | -0.28384 | 0.000103 | 0.423653 | 1 to 2 year  | 12 |
| 0.0011    | -0.00039  | 9.418569 | 0.243551 | -0.96989 | 0.002535 | 0.408747 | 2 to 5 year  | 6  |
| 0.002295  | 0.00551   | 4.841191 | -0.19558 | 0.980687 | 0.006205 | 0.387621 | 5 to 10 year | 10 |
| -0.00028  | -0.00062  | 10.31837 | -0.92986 | -0.3679  | 0.062812 | 0.32094  | 2 to 5 year  | 5  |
| 0.000453  | 0.000402  | 7.477843 | 0.861715 | -0.50739 | 0.01583  | 0.397747 | 2 to 5 year  | 3  |
| -0.00046  | 0.002523  | 5.318647 | 0.781001 | 0.62453  | 0.042118 | 0.349723 | Over 10 ye   | 3  |
| -0.00037  | 0.000395  | 7.243243 | -0.01524 | 0.999884 | 0.037988 | 0.325697 | 2 to 5 year  | 6  |

Table S2 - Anonymized database

|           |           |          |          |          |          |          |              |    |
|-----------|-----------|----------|----------|----------|----------|----------|--------------|----|
| -0.00061  | -0.00019  | 8.427426 | -0.53394 | 0.845524 | 0.000184 | 0.415632 | 2 to 5 year  | 3  |
| -0.00108  | -0.00118  | 9.110424 | 0.81459  | -0.58004 | 0.043763 | 0.373741 | 2 to 5 year  | 24 |
| 0.002565  | 0.000252  | 7.01588  | -0.81028 | -0.58604 | 0.008547 | 0.386603 | 5 to 10 year | 8  |
| 0.000404  | -0.00101  | 6.550444 | -0.98501 | 0.172514 | 0.000392 | 0.415925 | 5 to 10 year | 9  |
| 0.00033   | 0.000413  | 7.68102  | 0.622847 | 0.782343 | 0.01425  | 0.411578 | Over 10 year | 14 |
| -0.00354  | -0.0001   | 7.882977 | 0.95887  | -0.28384 | 0.000103 | 0.423653 | 1 to 2 year  | 12 |
| -0.00108  | -0.00118  | 9.110424 | 0.81459  | -0.58004 | 0.043763 | 0.373741 | 2 to 5 year  | 24 |
| 0.00096   | 0.005301  | 5.114022 | 0.944001 | -0.32994 | 4.06E-05 | 0.399017 | 5 to 10 year | 10 |
| -0.00045  | -0.0004   | 9.139278 | -0.97586 | -0.21837 | 0.009431 | 0.390315 | 2 to 5 year  | 20 |
| 0.004227  | 0.002337  | 5.757184 | -0.80577 | -0.59222 | 0.000278 | 0.402242 | Over 10 year | 7  |
| 2.80E-05  | 0.000158  | 7.935713 | 0.986909 | -0.16128 | 0.01295  | 0.403363 | 5 to 10 year | 6  |
| 3.30E-05  | 0.000103  | 7.984262 | 0.497598 | -0.86741 | 0.004843 | 0.391127 | 5 to 10 year | 11 |
| 0.001447  | 0.000749  | 5.42723  | 0.013815 | 0.999905 | 0.000165 | 0.401891 | Over 10 year | 5  |
| 3.70E-05  | 0.000344  | 6.792089 | -0.99023 | 0.139451 | 0.012965 | 0.387951 | 2 to 5 year  | 12 |
| -0.00019  | 0.000252  | 9.080857 | -0.15098 | 0.988537 | 0.023393 | 0.371974 | Over 10 year | 10 |
| -7.20E-05 | -4.70E-05 | 11.12294 | 0.04965  | 0.998767 | 0.103332 | 0.286539 | Over 10 year | 12 |
| 0.002791  | -0.00029  | 5.59797  | 0.994875 | -0.10112 | 0.000414 | 0.426809 | 2 to 5 year  | 2  |
| 2.20E-05  | -0.00026  | 8.60884  | 0.084634 | -0.99641 | 1.55E-05 | 0.411413 | 2 to 5 year  | 9  |
| 0.003221  | 0.001054  | 5.788663 | 0.94556  | 0.325447 | 0.005833 | 0.395439 | 2 to 5 year  | 8  |
| 0.000125  | 0.000106  | 8.09158  | -0.47147 | -0.88188 | 0.001293 | 0.395439 | 5 to 10 year | 12 |
| -3.90E-05 | -0.00066  | 10.38832 | -0.13929 | -0.99025 | 0.046155 | 0.323061 | Over 10 year | 15 |
| 0.005883  | 0.000297  | 5.461362 | 0.999997 | -0.00237 | 0.000945 | 0.432409 | 2 to 5 year  | 1  |
| -7.20E-05 | -4.70E-05 | 11.12294 | 0.04965  | 0.998767 | 0.103332 | 0.286539 | Over 10 year | 12 |
| -0.00048  | -0.00042  | 10.2381  | -0.54978 | 0.835311 | 0.021104 | 0.374728 | 2 to 5 year  | 3  |
| -0.00091  | -0.00011  | 7.181785 | 0.96959  | 0.244737 | 0.003353 | 0.400542 | 2 to 5 year  | 5  |
| -0.00069  | -0.00049  | 8.958983 | 0.132123 | -0.99123 | 0.044799 | 0.359558 | Over 10 year | 34 |
| -0.00108  | -0.00118  | 9.110424 | 0.81459  | -0.58004 | 0.043763 | 0.373741 | 2 to 5 year  | 24 |
| 0.000708  | 0.000582  | 7.037695 | 0.990504 | 0.137486 | 0.014558 | 0.400028 | Over 10 year | 7  |
| 0.000242  | -4.50E-05 | 7.396961 | -0.96834 | 0.249643 | 0.024769 | 0.391333 | 1 to 2 year  | 3  |
| -0.00011  | -0.00023  | 10.92632 | 0.31408  | -0.9494  | 0.064053 | 0.313069 | Over 10 year | 5  |
| -0.00045  | -0.0004   | 9.139278 | -0.97586 | -0.21837 | 0.009431 | 0.390315 | 2 to 5 year  | 20 |
| 0.000125  | 0.000106  | 8.09158  | -0.47147 | -0.88188 | 0.001293 | 0.395439 | 5 to 10 year | 12 |
| -0.00351  | -0.00493  | 9.698227 | 0.9886   | -0.15057 | 0.05117  | 0.320754 | 5 to 10 year | 10 |
| 0.002444  | -0.00025  | 6.068515 | -0.99992 | -0.01246 | 0.00288  | 0.395734 | 2 to 5 year  | 4  |
| 0.000382  | -0.00059  | 12.14705 | 0.290701 | 0.956814 | 0.001242 | 0.395773 | 1 to 2 year  | 11 |
| -0.00013  | 0.000117  | 9.363936 | -0.85537 | -0.51802 | 0.068087 | 0.336834 | 2 to 5 year  | 5  |
| -3.40E-05 | -0.00087  | 9.206155 | -0.75518 | 0.65552  | 0.021835 | 0.387149 | 5 to 10 year | 6  |
| 0.001468  | -3.60E-05 | 6.365498 | 0.172739 | 0.984968 | 0.056563 | 0.311263 | 1 to 2 year  | 2  |
| -0.00108  | -0.00118  | 9.110424 | 0.81459  | -0.58004 | 0.043763 | 0.373741 | 2 to 5 year  | 24 |
| -0.00018  | 0.000166  | 9.809126 | -0.98811 | -0.15374 | 0.017034 | 0.383016 | 2 to 5 year  | 4  |
| 0.000382  | -0.00059  | 12.14705 | 0.290701 | 0.956814 | 0.001242 | 0.395773 | 1 to 2 year  | 11 |
| -0.00028  | 0.000453  | 6.854851 | 0.797983 | 0.60268  | 0.009312 | 0.395292 | 2 to 5 year  | 16 |
| 0.002565  | 0.000252  | 7.01588  | -0.81028 | -0.58604 | 0.008547 | 0.386603 | 5 to 10 year | 8  |
| 2.20E-05  | -0.00026  | 8.60884  | 0.084634 | -0.99641 | 1.55E-05 | 0.411413 | 2 to 5 year  | 9  |
| 0.000106  | 0.000435  | 10.30726 | -0.07783 | 0.996966 | 0.000332 | 0.395629 | 5 to 10 year | 4  |
| 0.000108  | 1.90E-05  | 10.09791 | 0.863383 | 0.50455  | 0.003253 | 0.431537 | 2 to 5 year  | 3  |
| 8.00E-06  | -1.60E-05 | 13.27315 | 0.748272 | -0.66339 | 8.31E-07 | 0.311308 | 2 to 5 year  | 3  |
| 2.20E-05  | -0.00026  | 8.60884  | 0.084634 | -0.99641 | 1.55E-05 | 0.411413 | 2 to 5 year  | 9  |
| -0.00171  | 0.000814  | 6.917393 | 0.837894 | -0.54583 | 0.061167 | 0.312614 | 1 to 2 year  | 2  |
| -0.00023  | 0.000294  | 7.396209 | -0.85928 | 0.511503 | 0.102343 | 0.287067 | 5 to 10 year | 13 |

Table S2 - Anonymized database

|          |           |          |          |          |          |          |              |    |
|----------|-----------|----------|----------|----------|----------|----------|--------------|----|
| 0.001131 | 0.00063   | 7.54068  | 0.908182 | -0.41858 | 0.339062 | 0.343287 | 5 to 10 year | 5  |
| 0.002139 | -0.00178  | 6.95804  | -0.13969 | 0.990196 | 0.009714 | 0.385306 | 1 to 2 year  | 7  |
| -0.00069 | -0.00049  | 8.958983 | 0.132123 | -0.99123 | 0.044799 | 0.359558 | Over 10 ye   | 34 |
| 8.70E-05 | 2.70E-05  | 6.958606 | -0.76012 | -0.64978 | 0.003537 | 0.38875  | Over 10 ye   | 3  |
| 0.002301 | 0.003581  | 5.215646 | 0.603308 | 0.797508 | 0.01096  | 0.389974 | 1 to 2 year  | 5  |
| 8.50E-05 | -0.00011  | 8.182613 | 0.65839  | -0.75268 | 0.00036  | 0.432406 | 2 to 5 year  | 5  |
| -0.00054 | -0.00053  | 7.974645 | 0.37949  | -0.9252  | 0.003664 | 0.395188 | Over 10 ye   | 16 |
| 0.0011   | -0.00039  | 9.418569 | 0.243551 | -0.96989 | 0.002535 | 0.408747 | 2 to 5 year  | 6  |
| -0.00063 | -6.20E-05 | 8.821591 | -0.96326 | -0.26858 | 0.050648 | 0.295265 | 2 to 5 year  | 7  |
| -0.00126 | 0.000191  | 7.233391 | 0.378898 | 0.925438 | 0.008101 | 0.393838 | 1 to 2 year  | 6  |
| 0.000384 | 0.000594  | 7.174697 | -0.35256 | 0.935788 | 0.042672 | 0.359447 | 2 to 5 year  | 5  |
| -0.00063 | -6.20E-05 | 8.821591 | -0.96326 | -0.26858 | 0.050648 | 0.295265 | 2 to 5 year  | 7  |
| 0.003221 | 0.001054  | 5.788663 | 0.94556  | 0.325447 | 0.005833 | 0.395439 | 2 to 5 year  | 8  |
| -0.00181 | -3.80E-05 | 11.36418 | -0.63714 | 0.770751 | 0.001584 | 0.411519 | 5 to 10 year | 5  |
| 0.000332 | 0.001614  | 5.844646 | 0.999888 | 0.014955 | 0.022942 | 0.378116 | Over 10 ye   | 4  |
| -0.00054 | -0.00053  | 7.974645 | 0.37949  | -0.9252  | 0.003664 | 0.395188 | Over 10 ye   | 16 |
| 0.000404 | -0.00101  | 6.550444 | -0.98501 | 0.172514 | 0.000392 | 0.415925 | 5 to 10 year | 9  |
| -0.00201 | 6.60E-05  | 14.15868 | 0.97946  | -0.20164 | 0.020628 | 0.384548 | 2 to 5 year  | 3  |
| -0.00354 | -0.0001   | 7.882977 | 0.95887  | -0.28384 | 0.000103 | 0.423653 | 1 to 2 year  | 12 |
| 0.000928 | 0.000315  | 7.07586  | -0.01795 | -0.99984 | 0.047869 | 0.34643  | 5 to 10 year | 26 |
| -0.00063 | -6.20E-05 | 8.821591 | -0.96326 | -0.26858 | 0.050648 | 0.295265 | 2 to 5 year  | 7  |
| -0.00048 | -0.00042  | 8.983812 | -0.95159 | 0.307365 | 0.001385 | 0.40293  | 2 to 5 year  | 5  |
| 8.70E-05 | 2.70E-05  | 6.958606 | -0.76012 | -0.64978 | 0.003537 | 0.38875  | Over 10 ye   | 3  |
| 0.000705 | 0.000384  | 6.483116 | -0.75141 | 0.659836 | 0.016717 | 0.333957 | Over 10 ye   | 9  |
| 0.002565 | 0.000252  | 7.01588  | -0.81028 | -0.58604 | 0.008547 | 0.386603 | 5 to 10 year | 8  |
| -0.00029 | -6.10E-05 | 10.92574 | 0.009512 | -0.99995 | 0.040339 | 0.342214 | 2 to 5 year  | 8  |
| 0.000265 | -0.00173  | 8.467335 | 0.624563 | -0.78097 | 0.032531 | 0.341907 | 2 to 5 year  | 9  |
| 2.20E-05 | -0.00026  | 8.60884  | 0.084634 | -0.99641 | 1.55E-05 | 0.411413 | 2 to 5 year  | 9  |
| -0.00317 | -0.00758  | 8.285575 | 0.381979 | -0.92417 | 0.008867 | 0.385166 | Over 10 ye   | 17 |
| 0.001547 | 0.000517  | 6.168585 | 0.008704 | 0.999962 | 0.001499 | 0.425114 | 5 to 10 year | 3  |
